# Supplementary material for: The tumor immune microenvironmental analysis of 2,033 transcriptomes across 7 cancer types
Source: Sci Rep. 2020 Jun 12;10:9536. doi: 10.1038/s41598-020-66449-0 (PMC7293350; doi:10.1038/s41598-020-66449-0)
Supplement: Supplementary file 1 — Supplementary information. [file 41598_2020_66449_MOESM1_ESM.pdf]

## **Supplementary Information**

### **The tumor immune microenvironmental analysis of 2,033 transcriptomes across 7 cancer types**

Sungjae Kim<sup>1,2,3,6</sup>, Ahreum Kim<sup>4,6</sup>, Jong-Yeon Shin<sup>2</sup>, Jeong-Sun Seo<sup>1,2,3,5</sup>

<sup>1</sup>Precision Medicine Center, Seoul National University Bundang Hospital, Seongnam, 13605, Republic of Korea

<sup>2</sup>Precision Medicine Institute, MacroGen Inc., Seongnam, 13605, Republic of Korea

<sup>3</sup>Department of Biomedical Sciences, Seoul National University Graduate School, Seoul, 03080, Republic of Korea

<sup>4</sup>CHA University School of Medicine, Seongnam, 13488, Republic of Korea

<sup>5</sup>Gong-Wu Genomic Medicine Institute, Seoul National University Bundang Hospital, Seongnam, 13605, Republic of Korea

<sup>6</sup>These authors contributed equally to this work

#### **Corresponding author:**

Jeong-Sun Seo, MD, PhD

Precision Medicine Center,

Seoul National University Bundang Hospital,

172 Dolma-ro, Seongnam, Bundang-gu, Gyeonggi-do 13605, Republic of Korea,

Tel: +82-10-8963-8246; Fax: +82-31-600-3011; E-mail: jeongsunseo@gmail.com

## Supplementary Figures

**Supplementary Fig 1. Dendrogram plots of 10 cancer types at  $k=2$  and  $k=3$ .**

**Supplementary Fig 2. Correlation plots between purity inferred by ESTIMATE and ABSOLUTE of 7 cancer types.** The x-axis corresponds to the purity data from ESTIMATE (A) and y-axis to the data from ABSOLUTE (B). Correlation coefficient and p-values were calculated using Pearson's product-moment correlation.

**Supplementary Fig 3. Sample inclusion flow chart.**

**Supplementary Fig 4. Diagram showing the status of elevated expression of several immune molecules.** For subtype B, yellow color and red color squares represent elevation without and with statistical significance, respectively. For subtype A, blue color and sky blue color squares, respectively. Statistical significances between subtypes were measured by unpaired Student *t* test.

**Supplementary Fig 5. The expression profile of signature genes for cDC1 and NK cell suppression in KIRP and SKCM.** The expression heatmap between the immune subtypes. **a**, in KIRP. **b**, in SKCM. Statistical significance was measured by Student *t* test.

**Supplementary Fig 6. Significantly amplified (red) and deleted (blue) regions in immune-deficient (subtype A) and immune-competent (subtype B) across 7 cancer types.** Immune checkpoint genes are presented at the loci if included.

**Supplementary Fig 7. Predicted neoepitope loads between the subtypes across 7 cancer types.**

**Supplementary Fig 8. Correlation plots between predicted SNV neoantigen loads and cytolytic (CYT) scores of immune-deficient subtypes (left) and immune-competent subtypes (right) across 7 cancer types.**

## **Supplementary Tables**

**Supplementary Table 1. Top 1,000 most variable genes used for unsupervised hierarchical clustering in 10 cancer types**

**Supplementary Table 2. Gene set enrichment analysis results of top 1,000 most variable genes used for unsupervised hierarchical clustering in 10 cancer types**

**Supplementary Table 3. Significantly amplified and deleted loci across 7 cancer types**

**Supplementary Table 4. Significantly amplified and deleted genes across 7 cancer types**

**Supplementary Table 5. Immune subtypes in 7 cancer types**

a

k=2

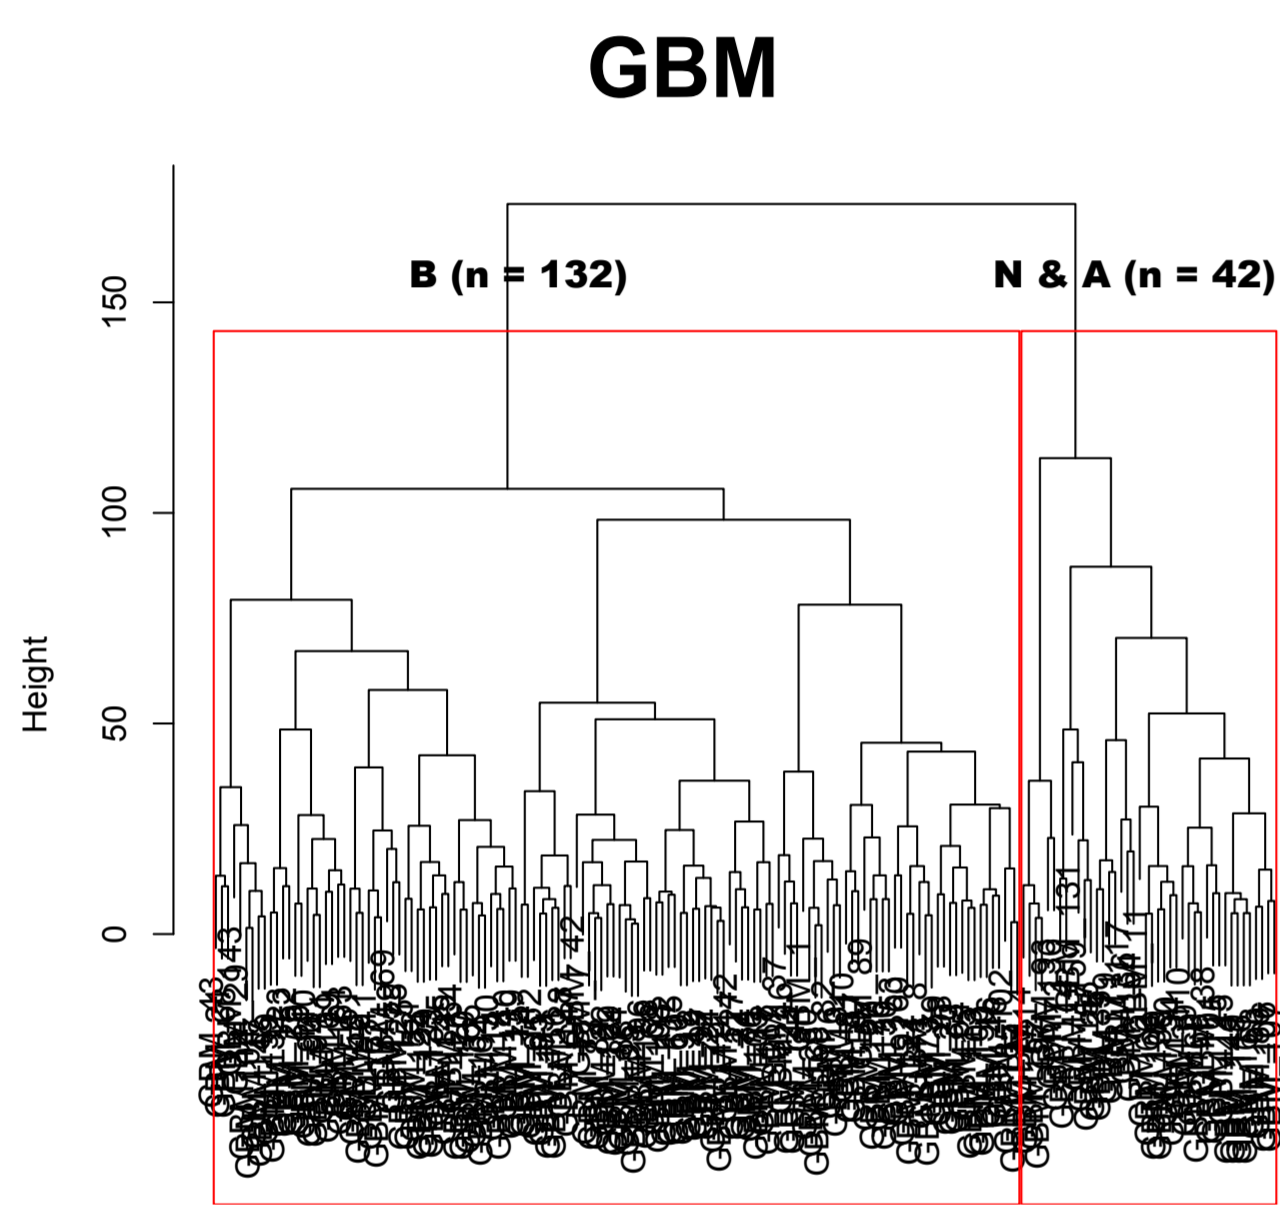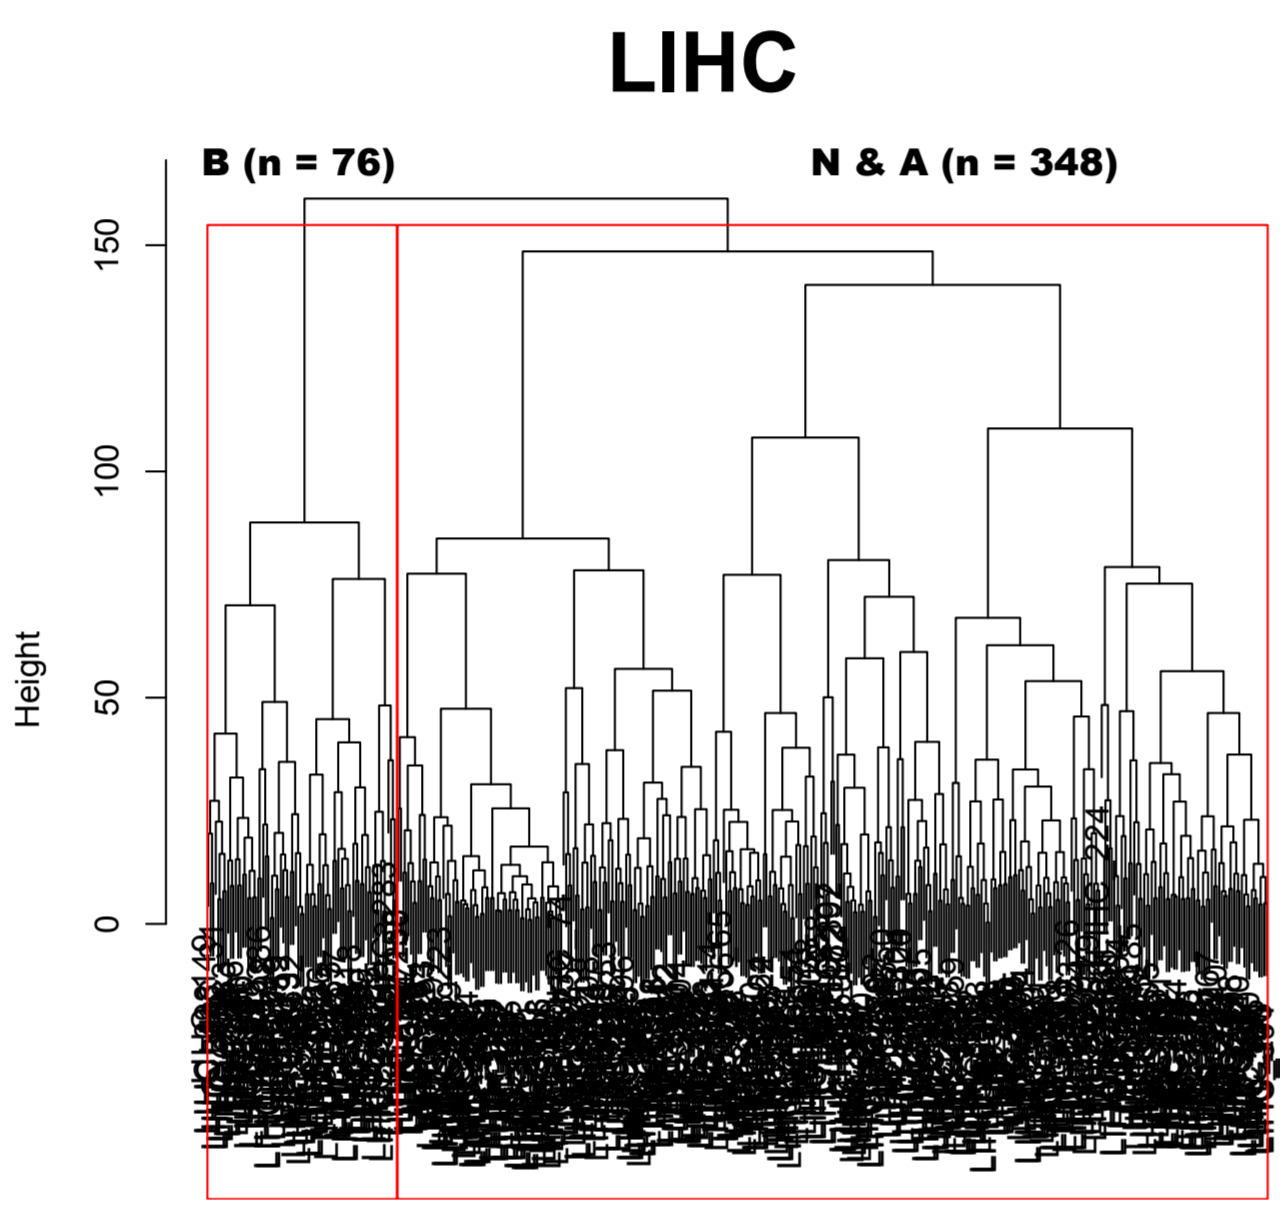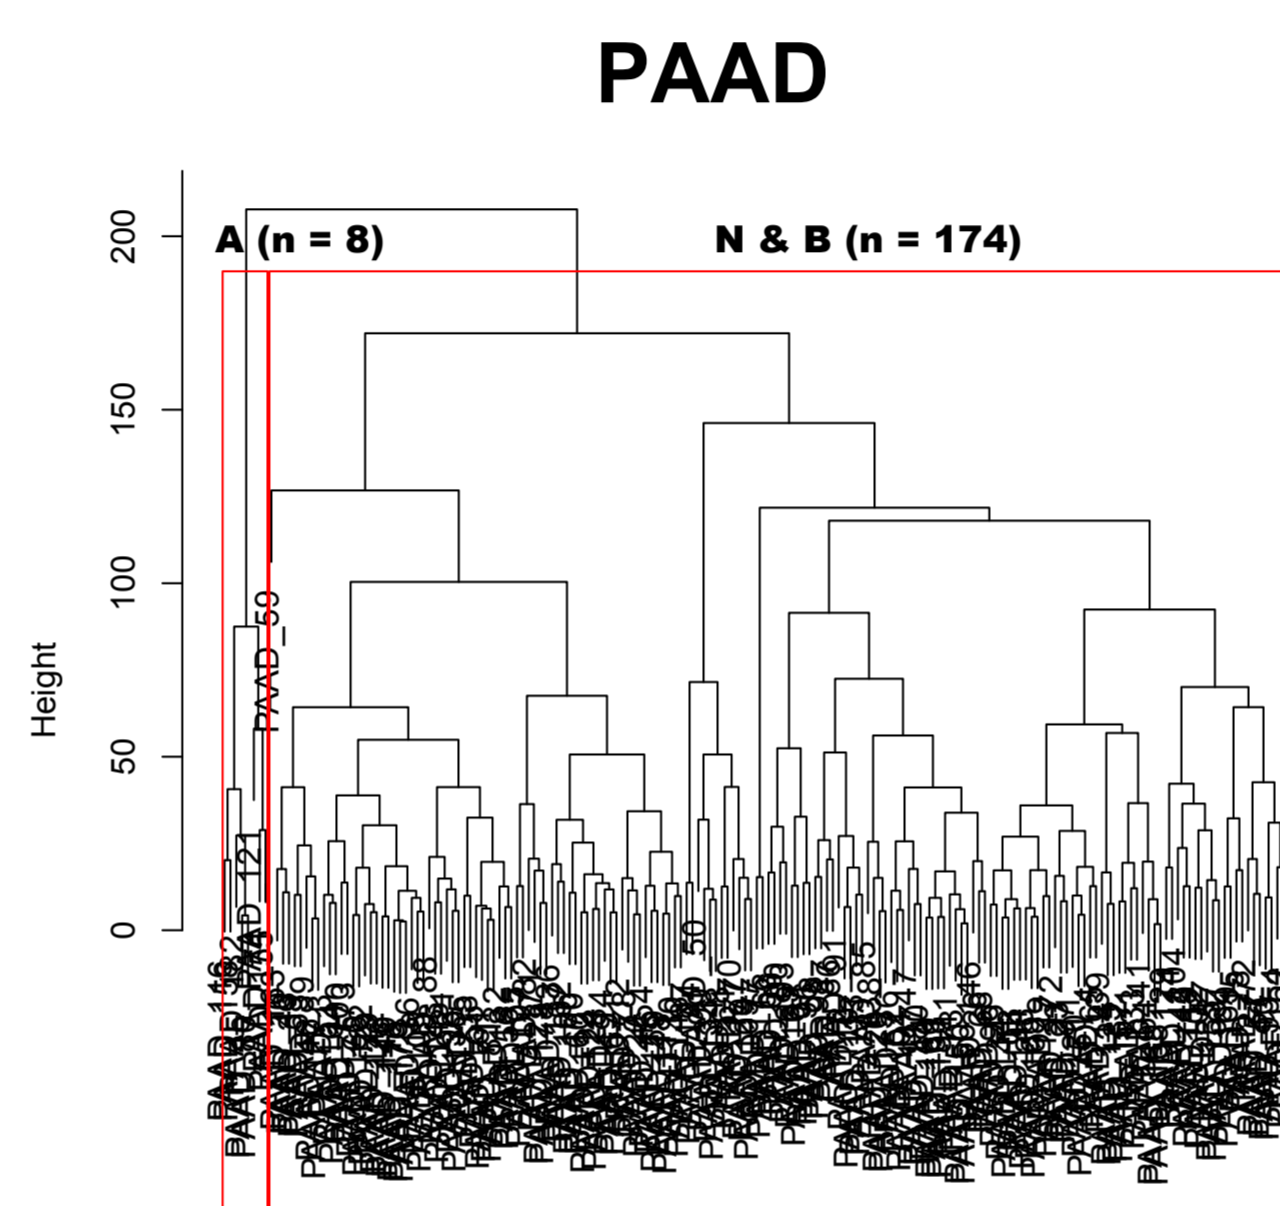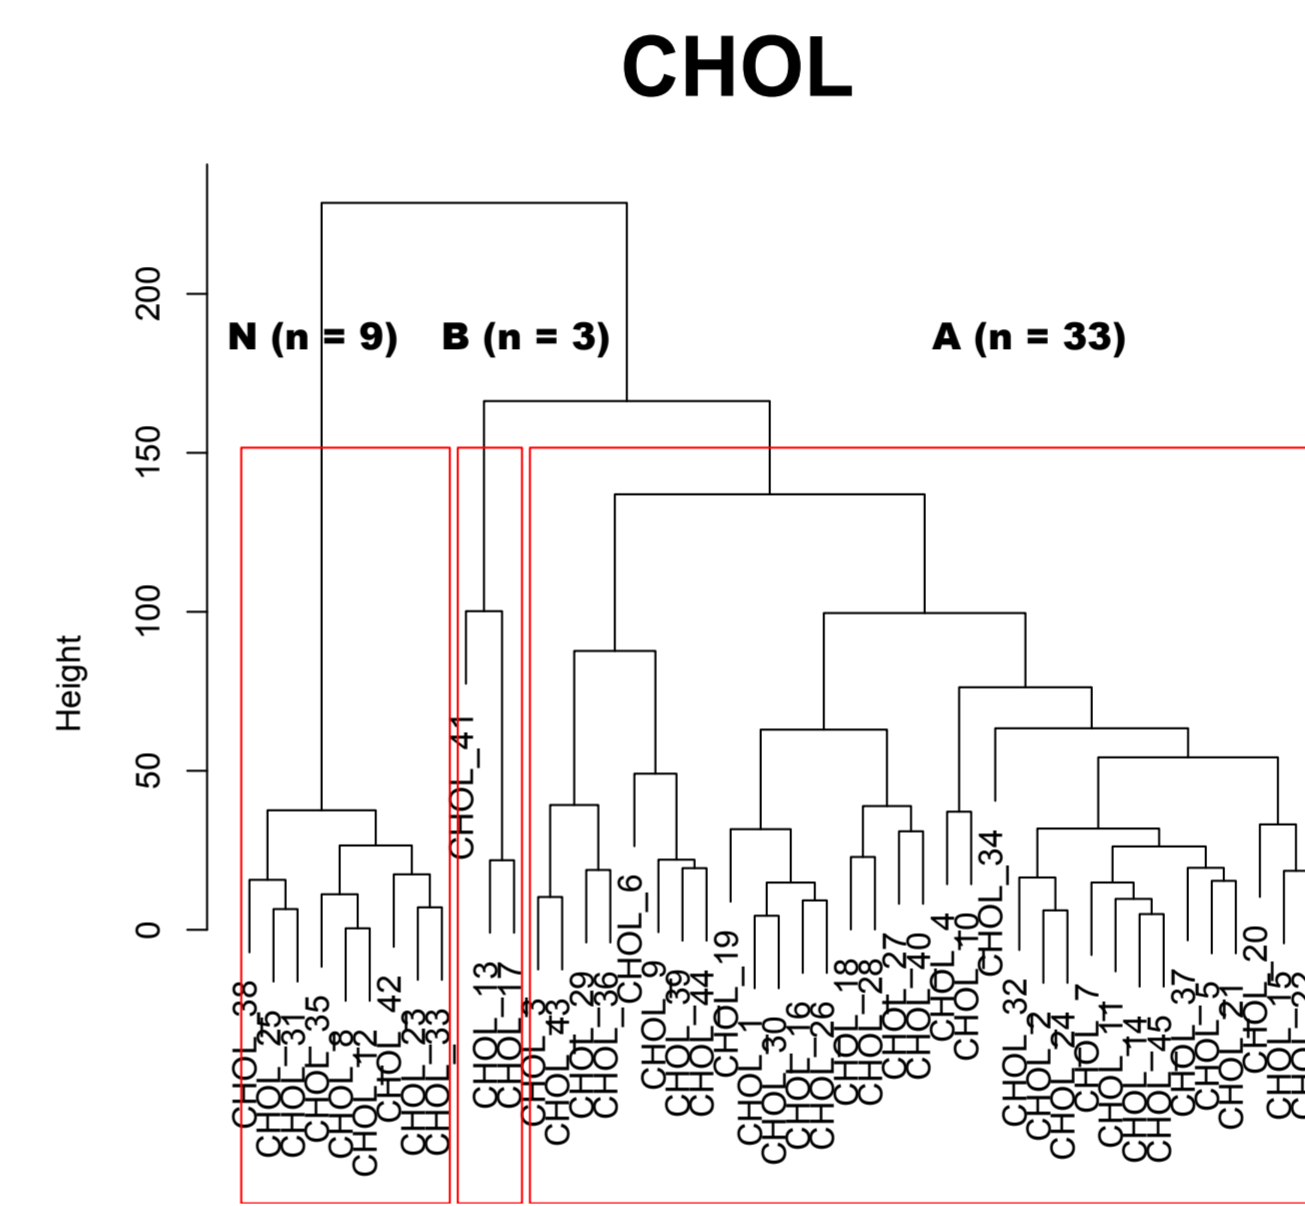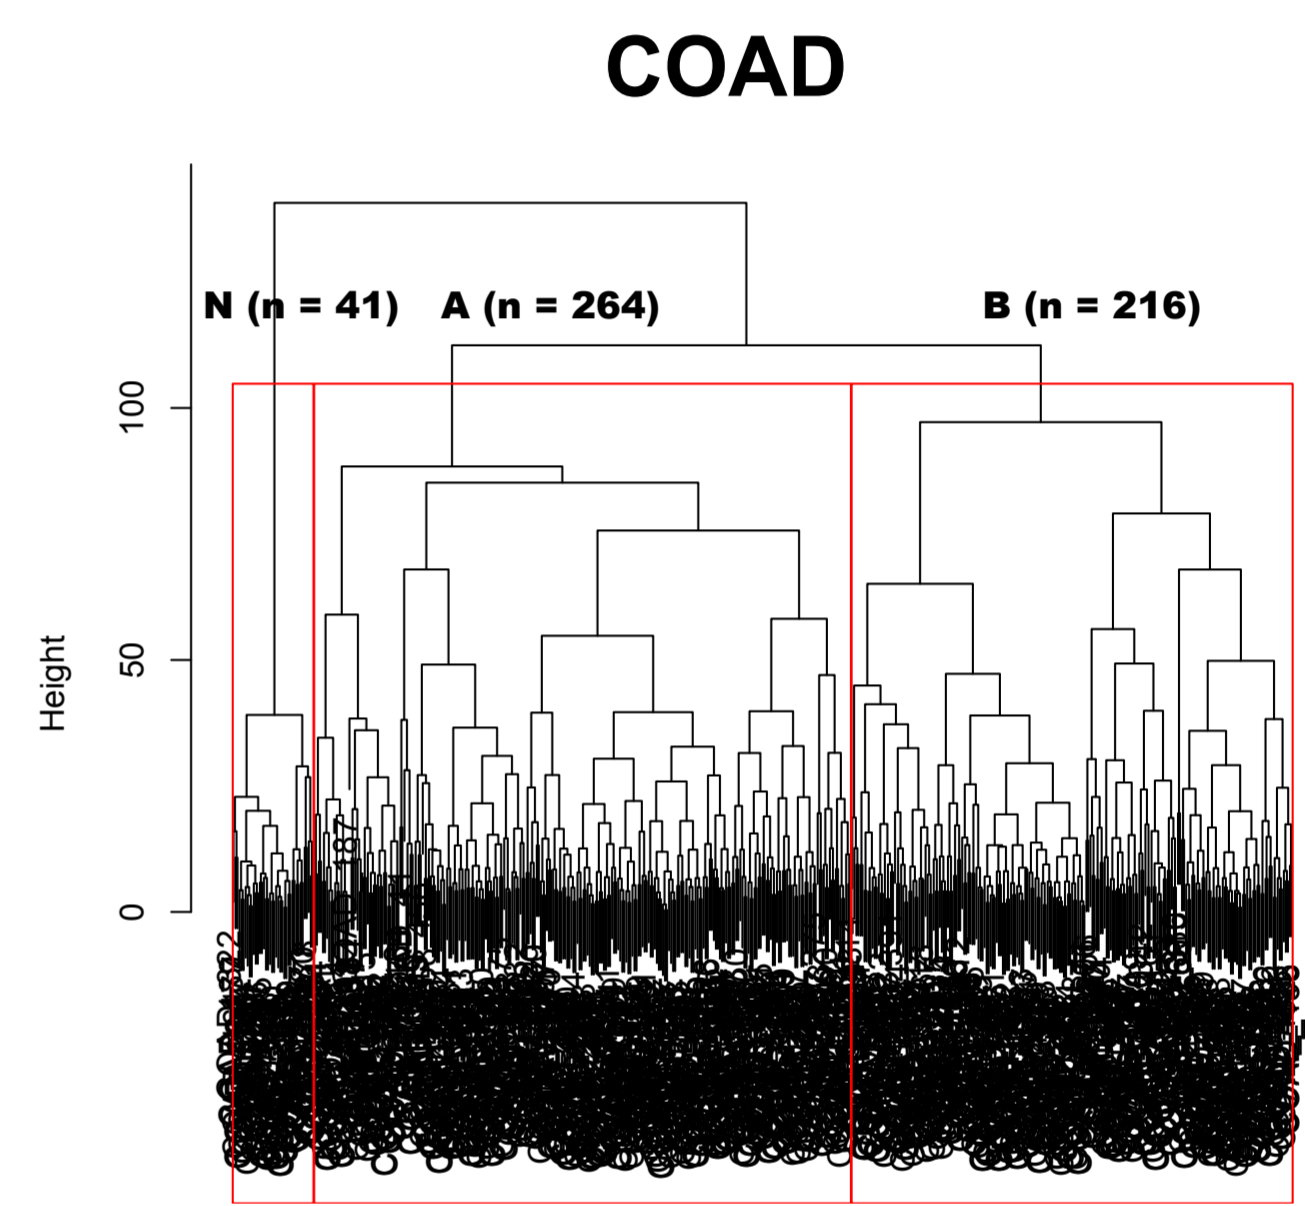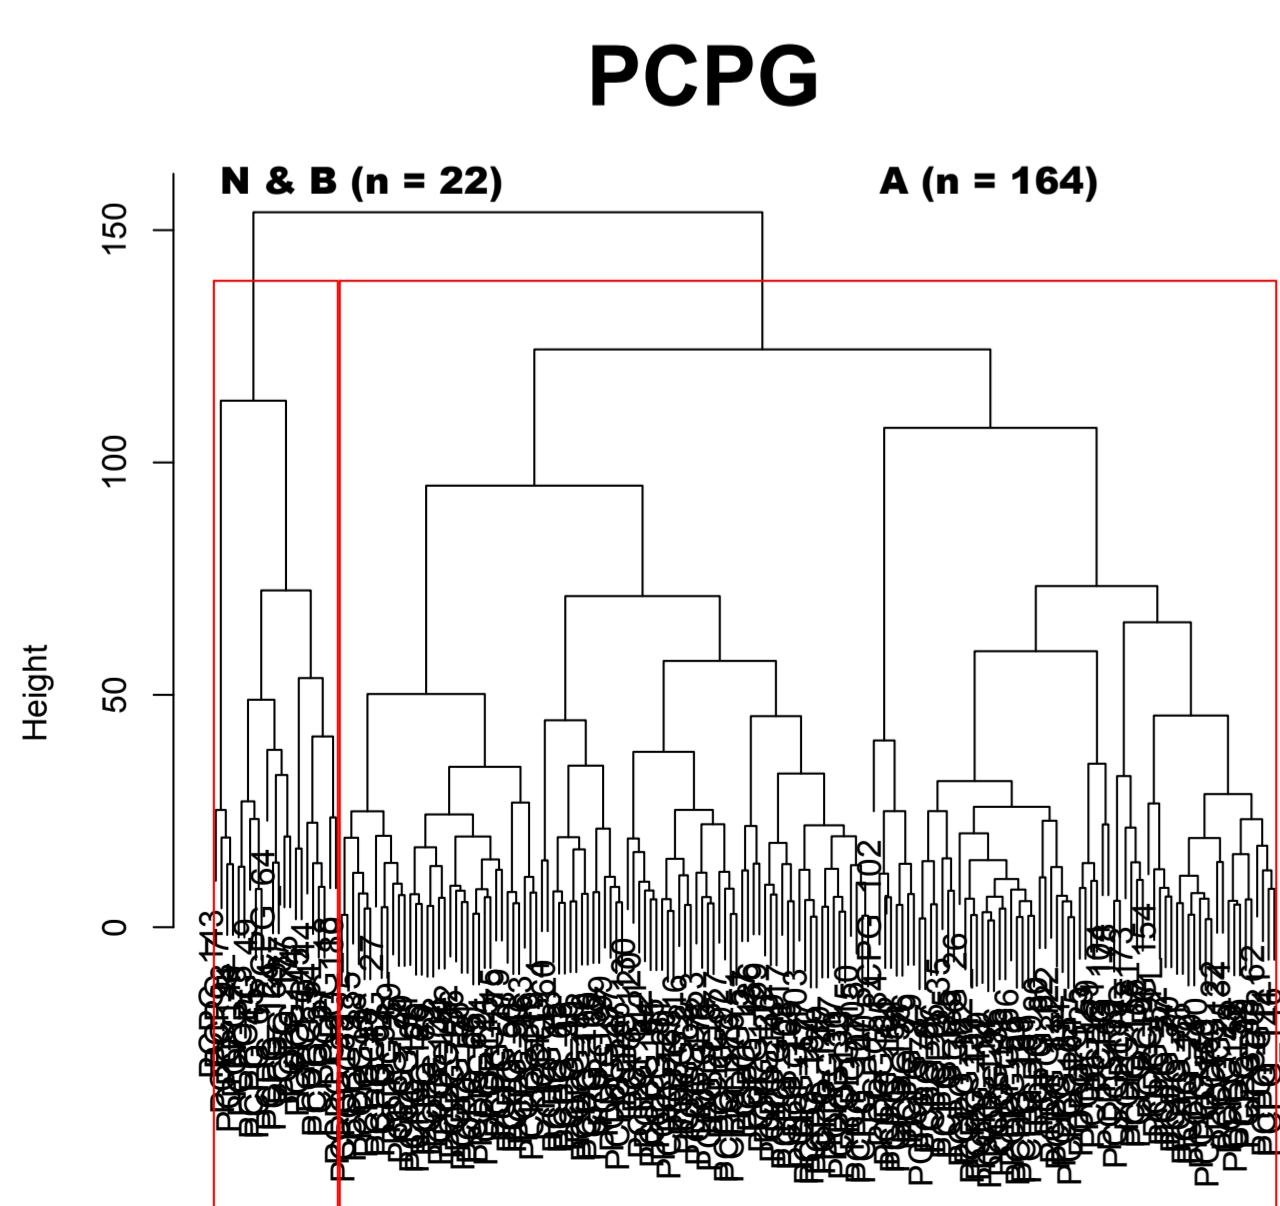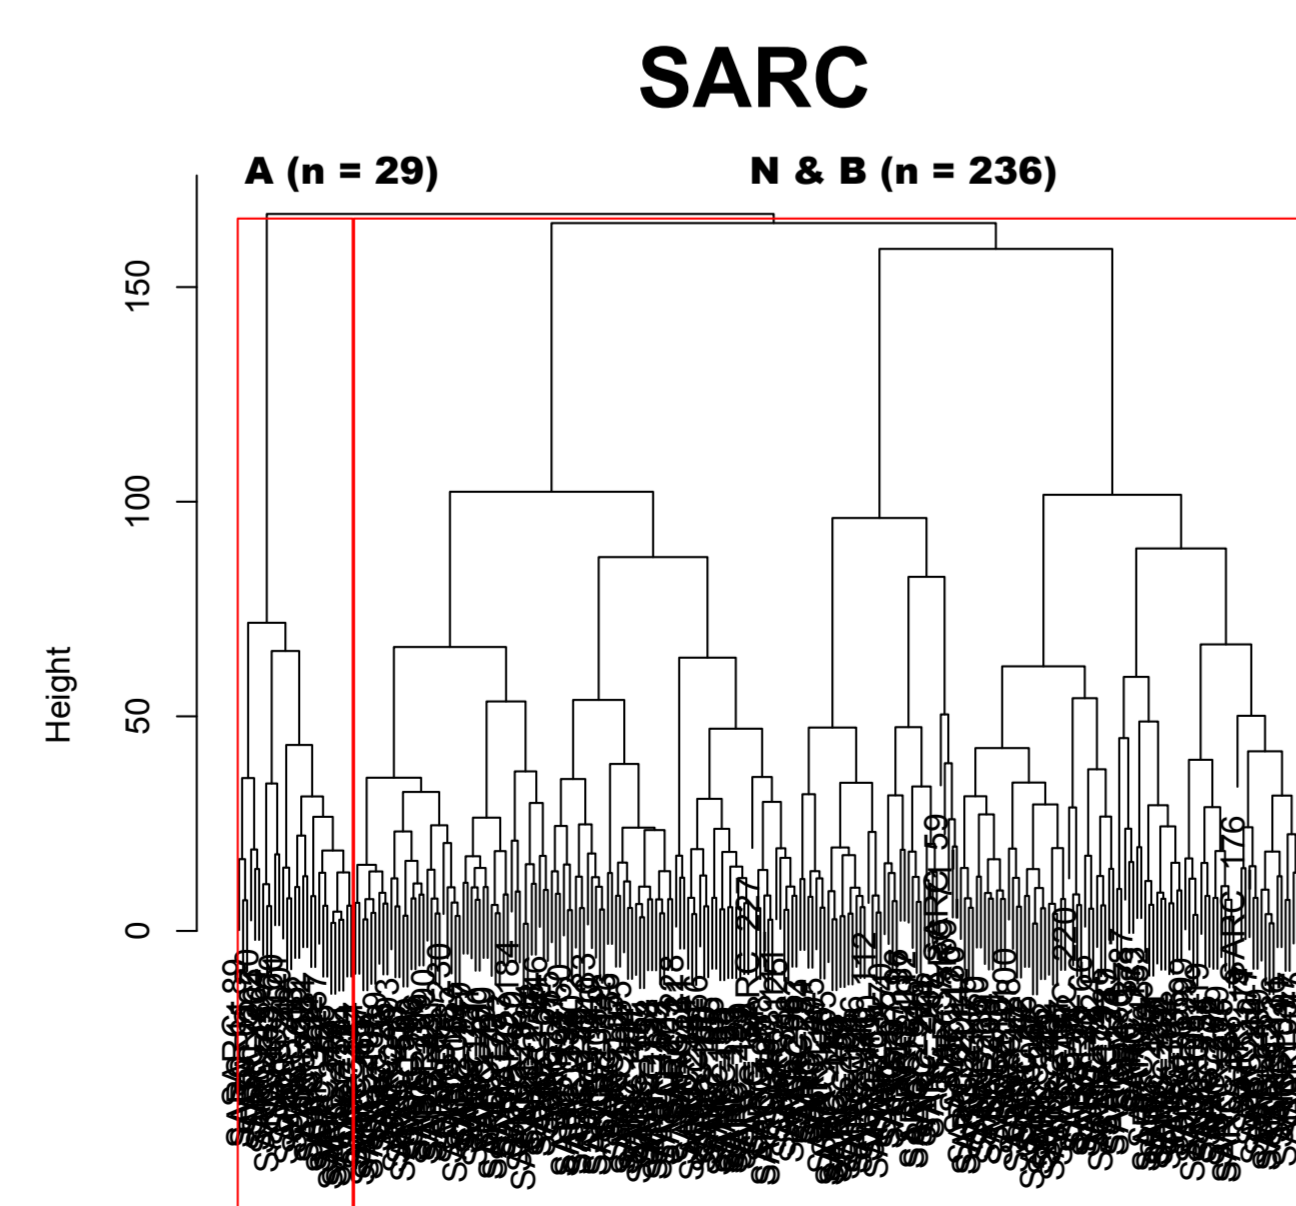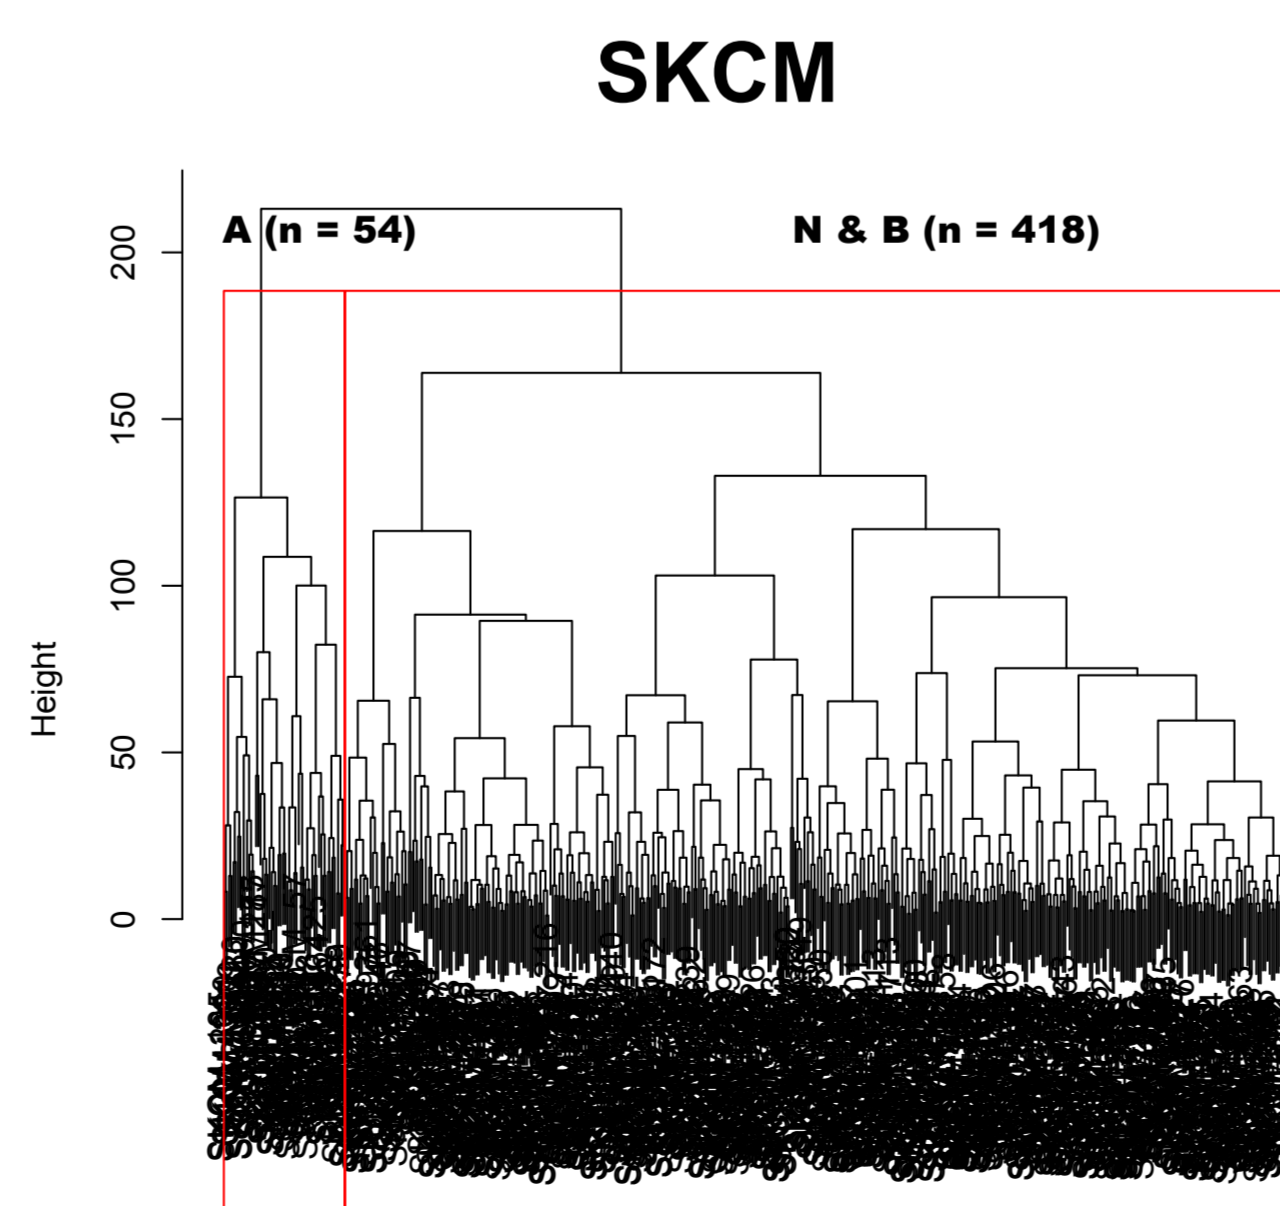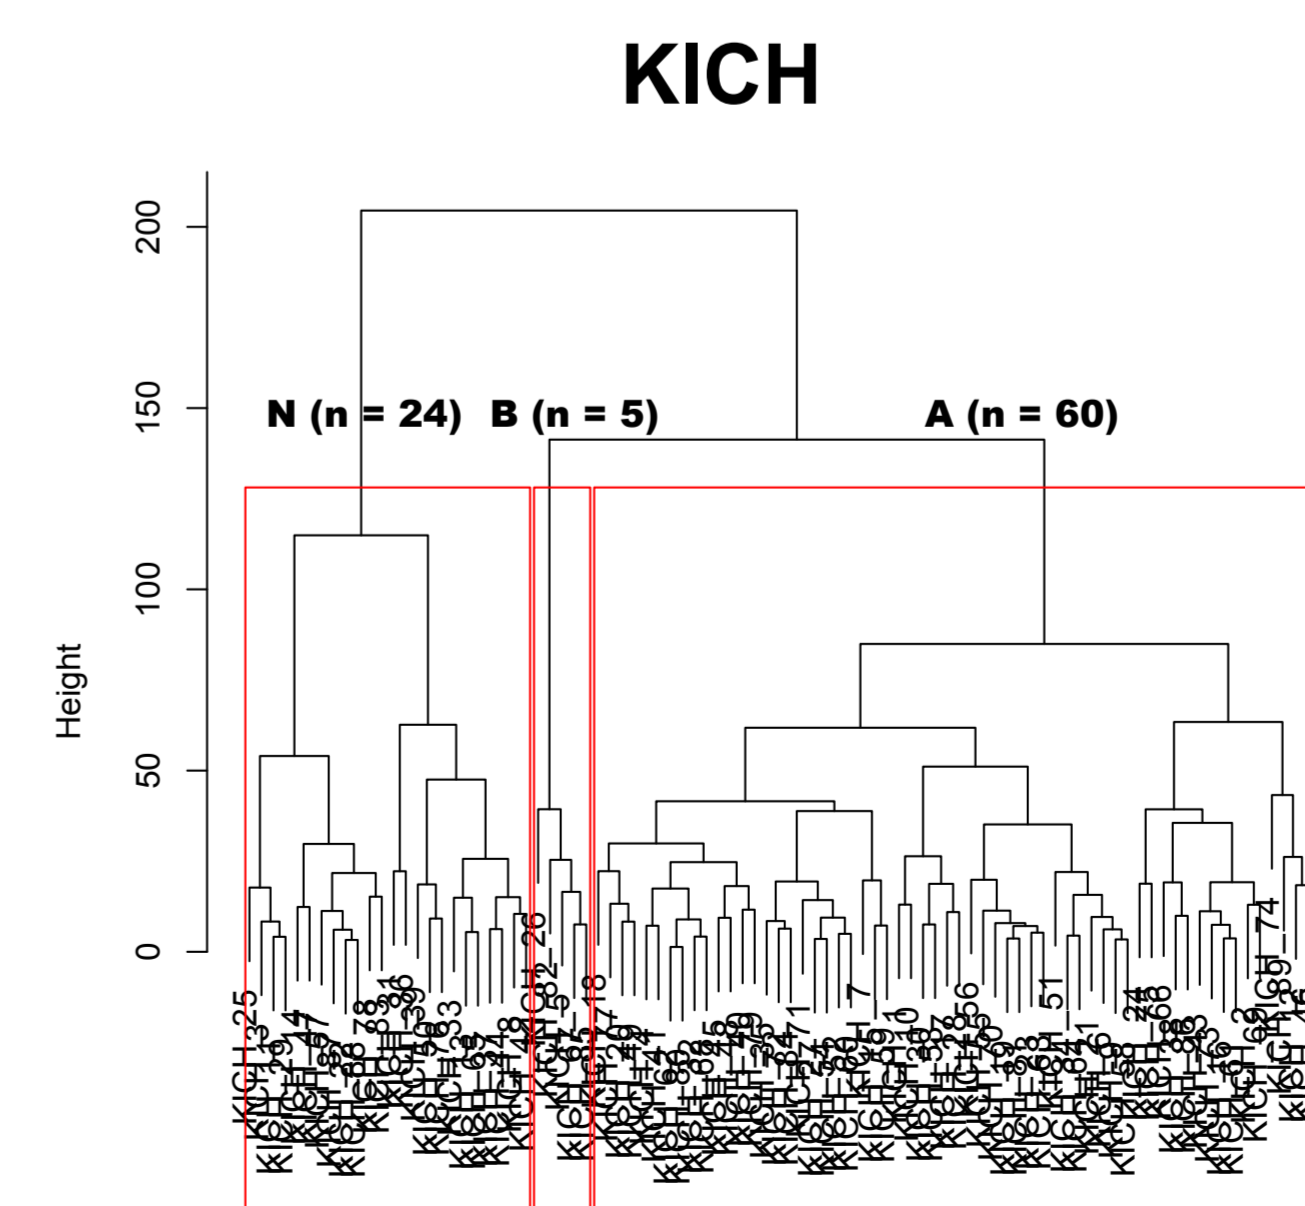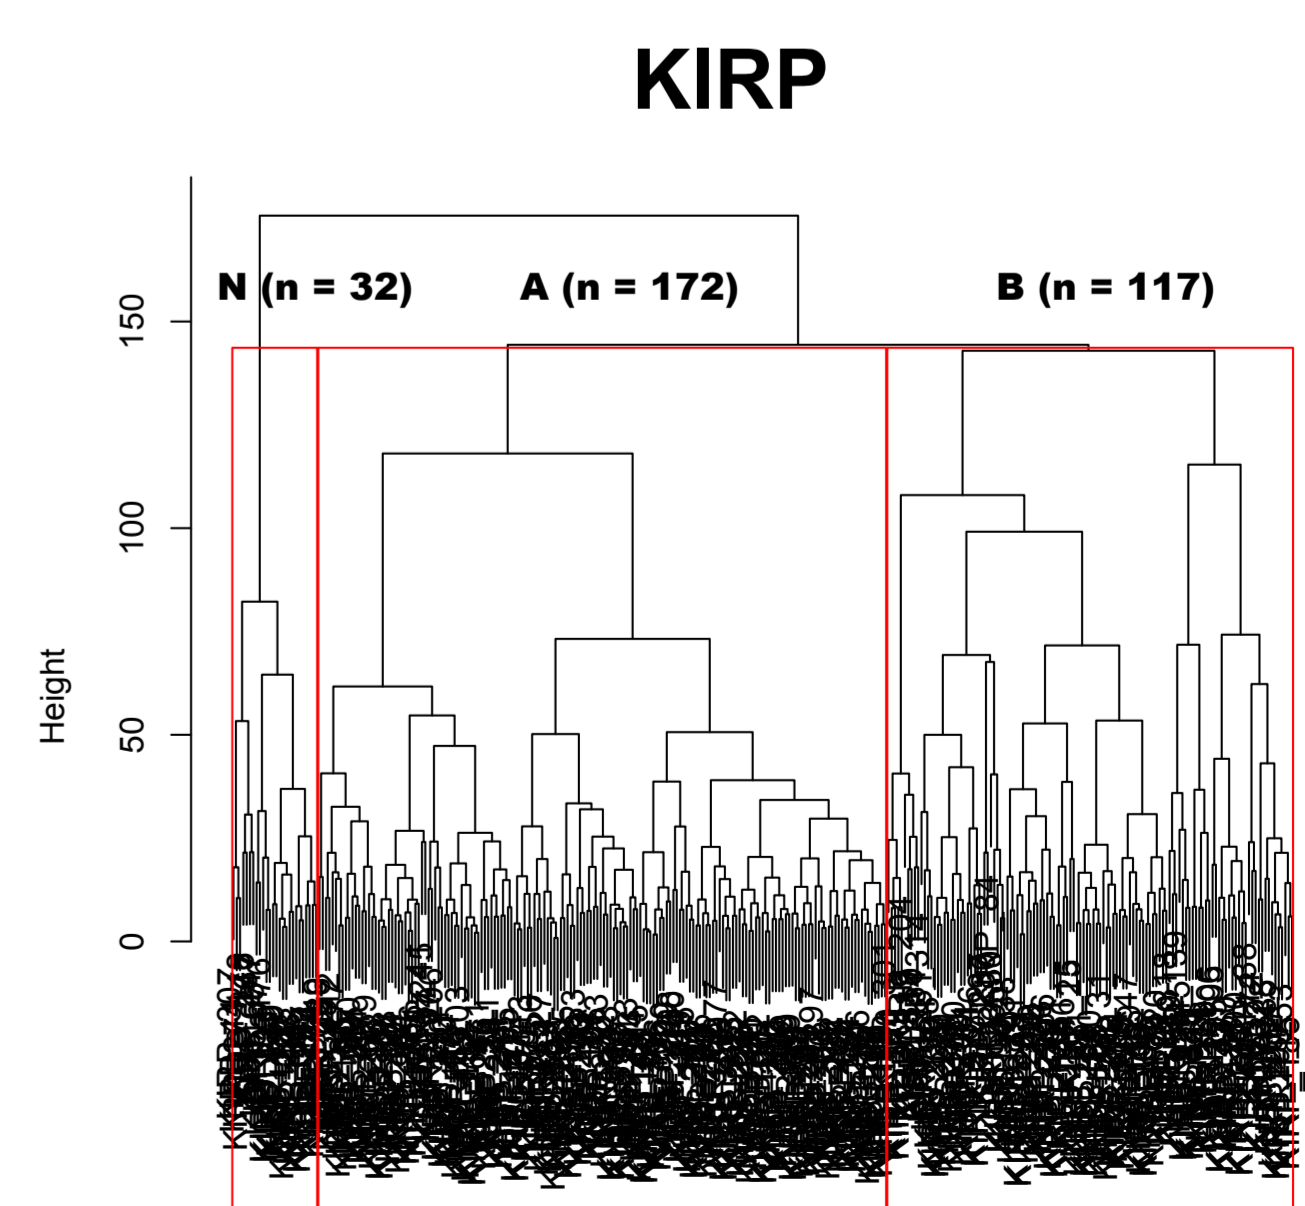

A: Immune-deficient subtype (Subtype A)  
B: Immune-competent subtype (Subtype B)  
N: noncancer controls

b

k=3

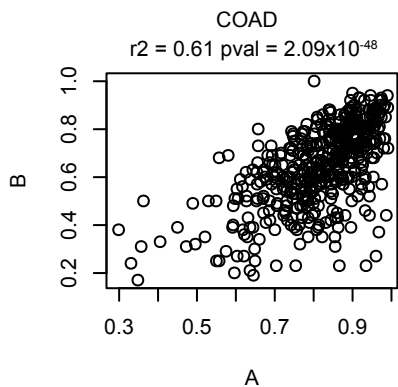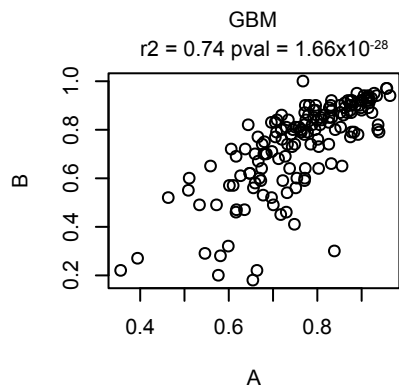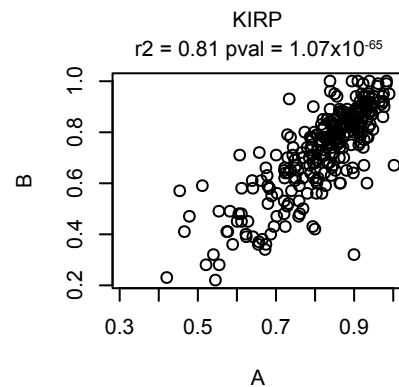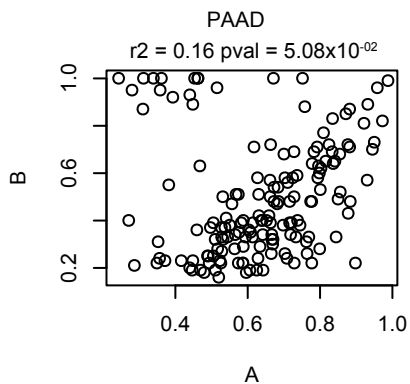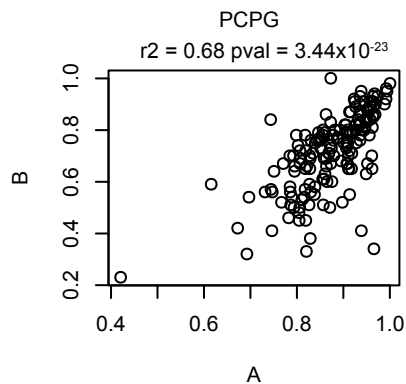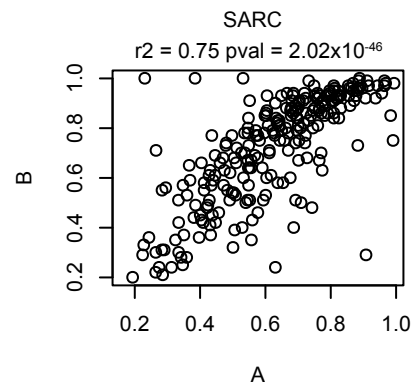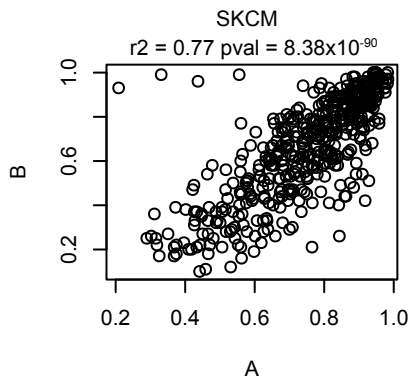

A: ESTIMATE

B: ABSOLUTE

TCGA transcriptomic data

7,762 samples in 22 cancer types

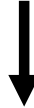

2,675 samples in 11 cancer types

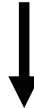

2,508 samples in 10 cancer types

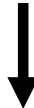

**2,033 samples in 7 cancer types**

Not clearly differentiated

Excluded BLCA, BRCA, CESC, ESCA  
, HNSC, KIRC, PRAD, STAD, THCA,  
THYM and UCEC

Unbalanced distribution of the samples

Excluded READ

Non-significant changes in 4 estimated scores for  
TME

Excluded CHOL, KICH and LIHC

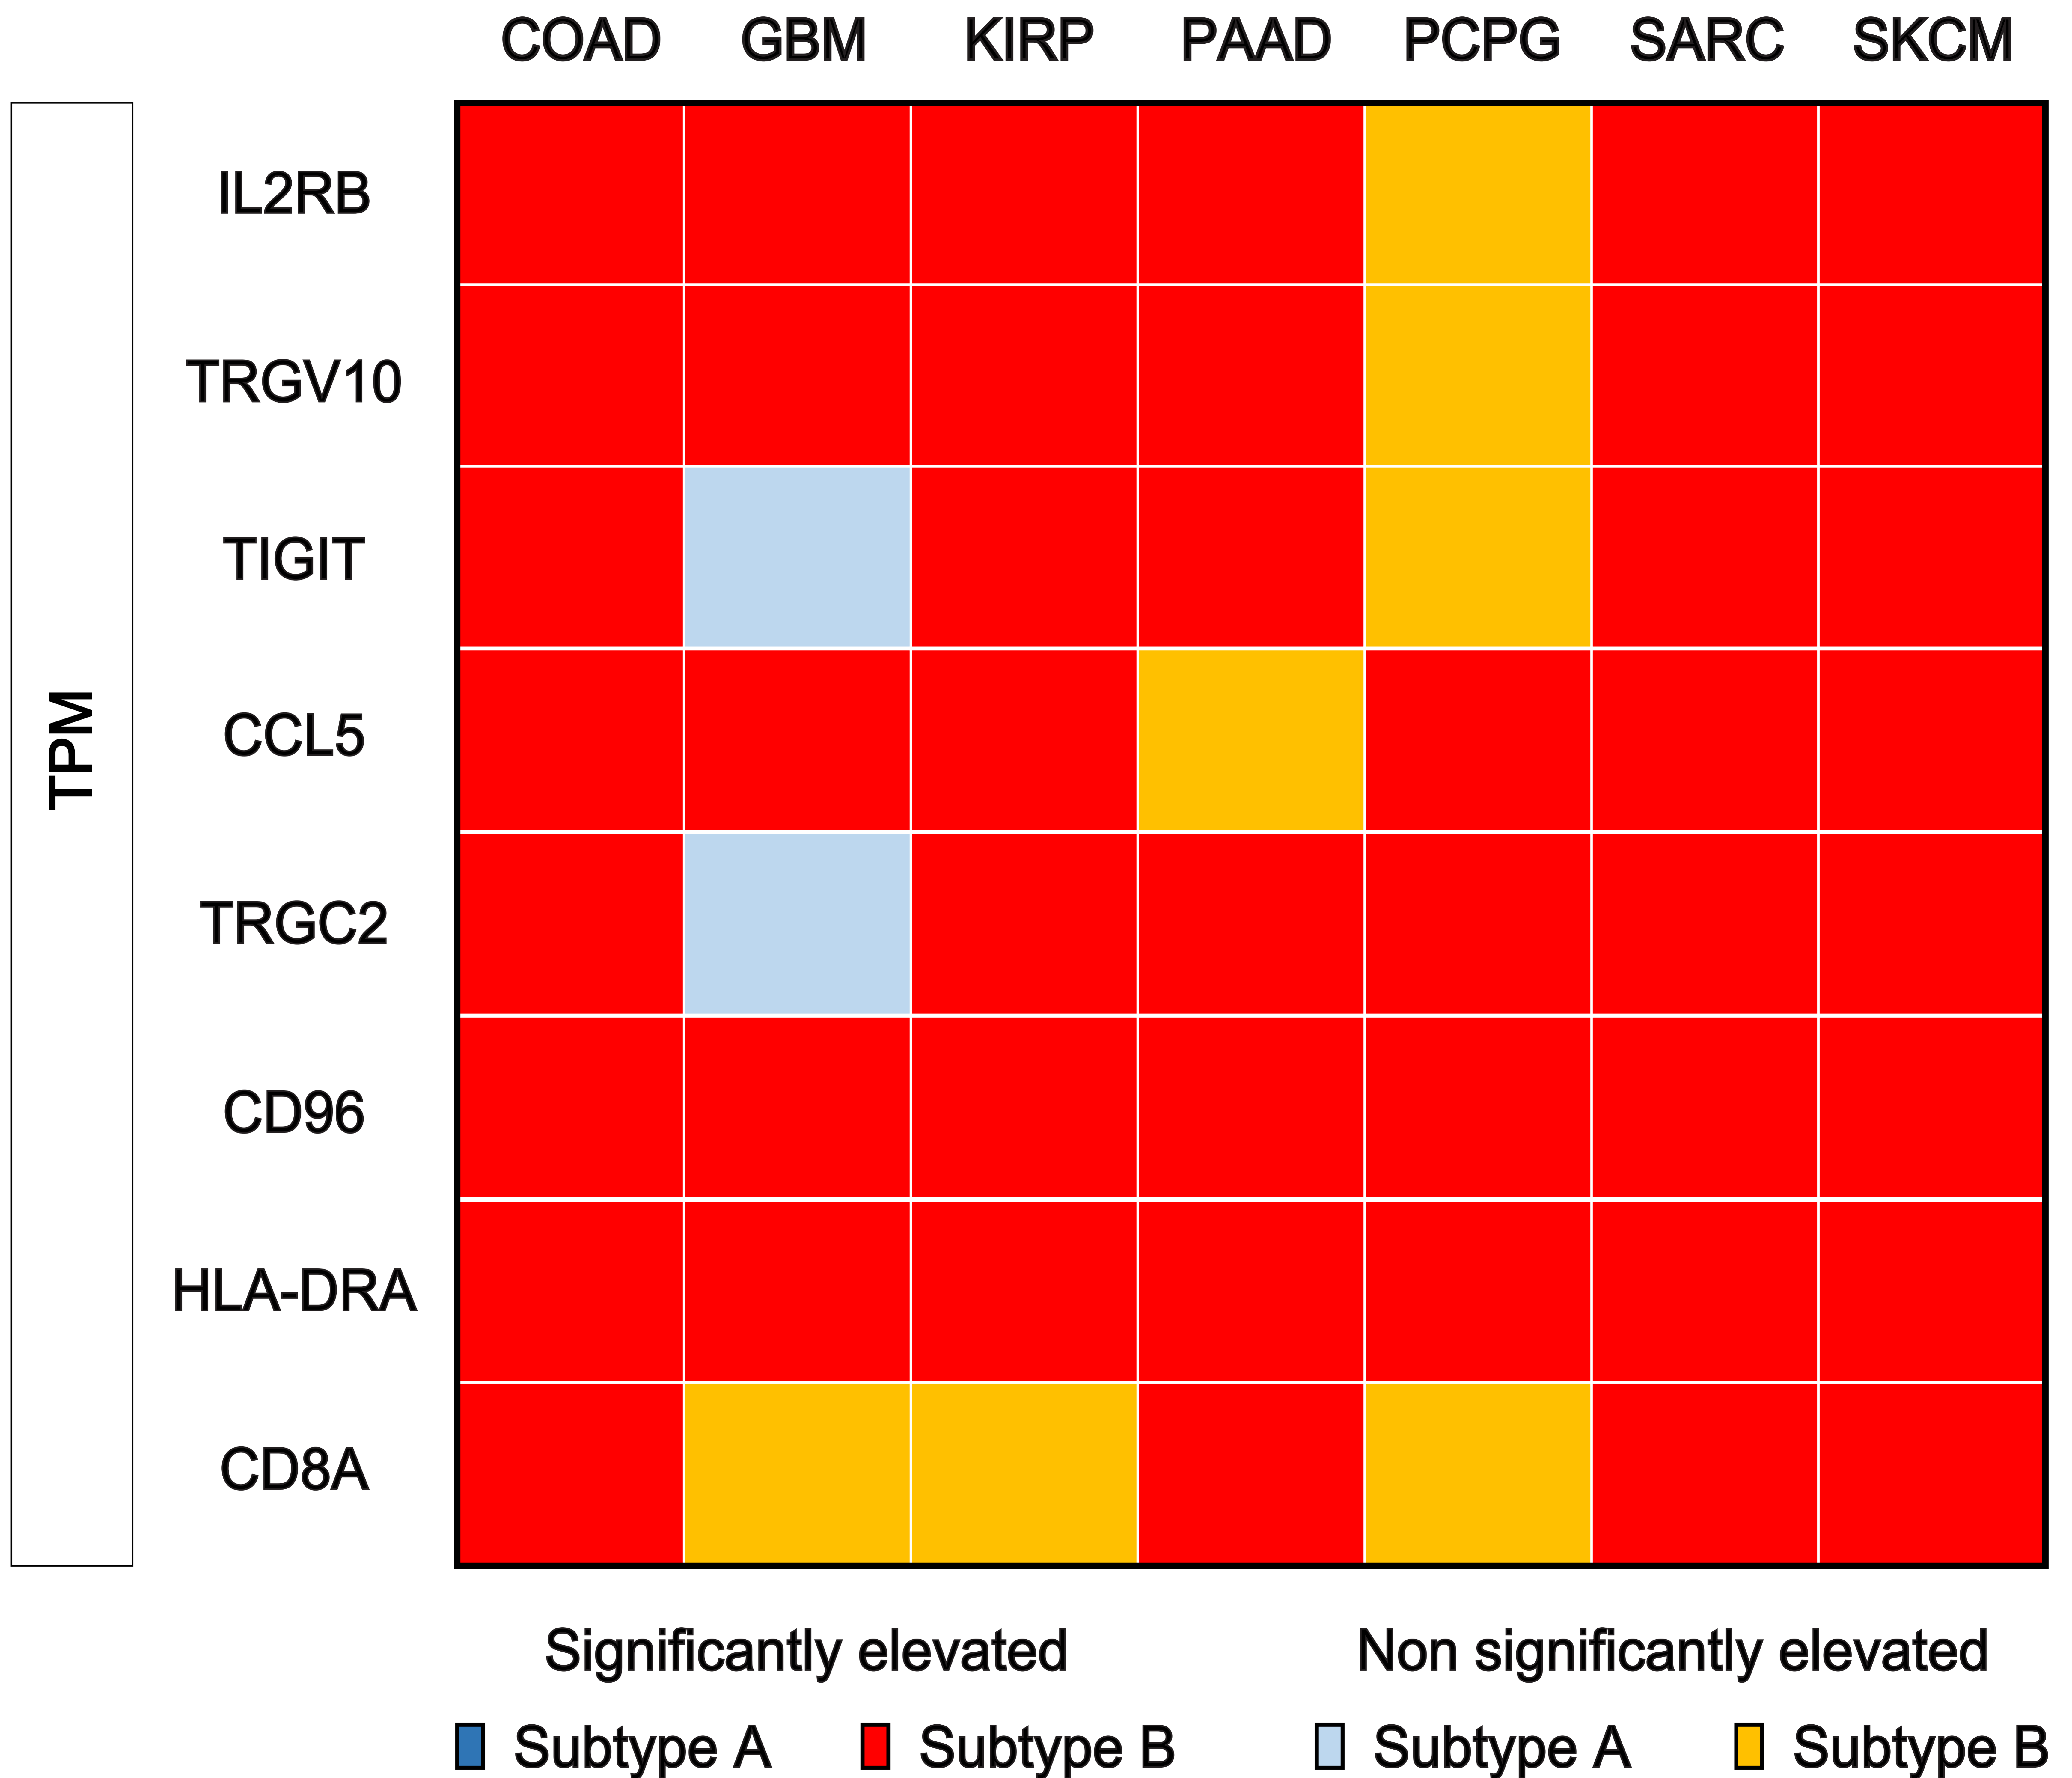

a

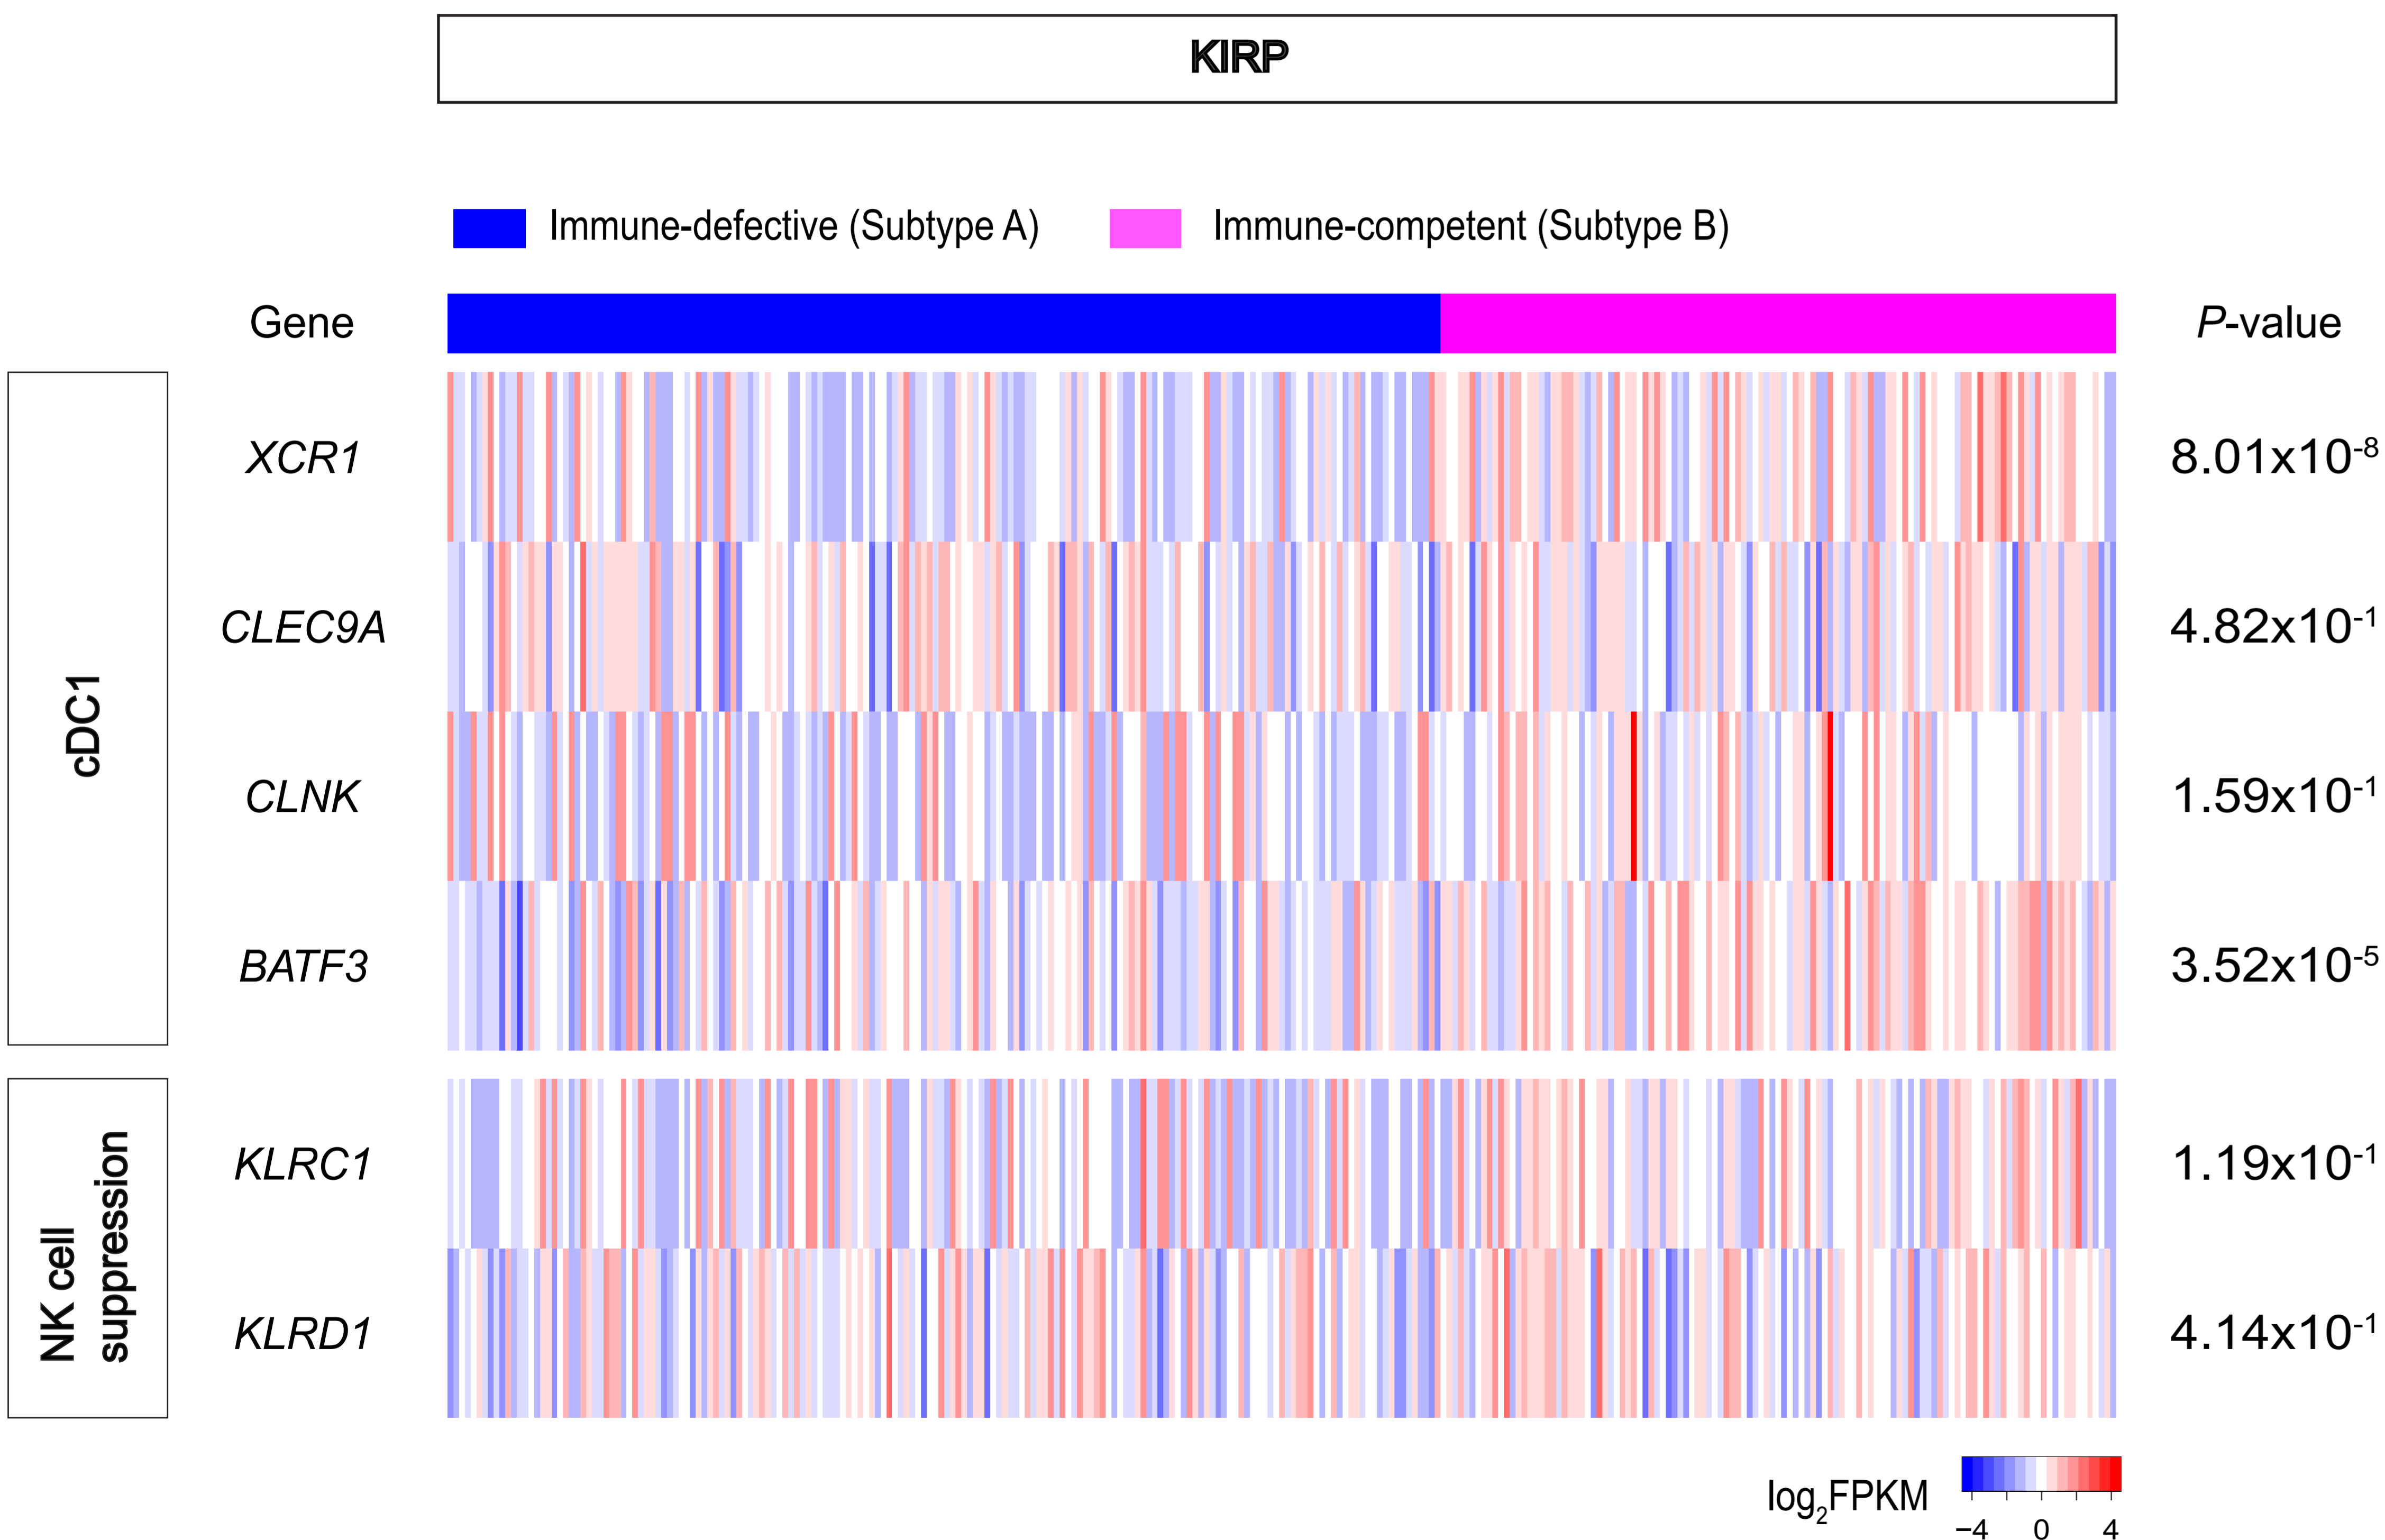

b

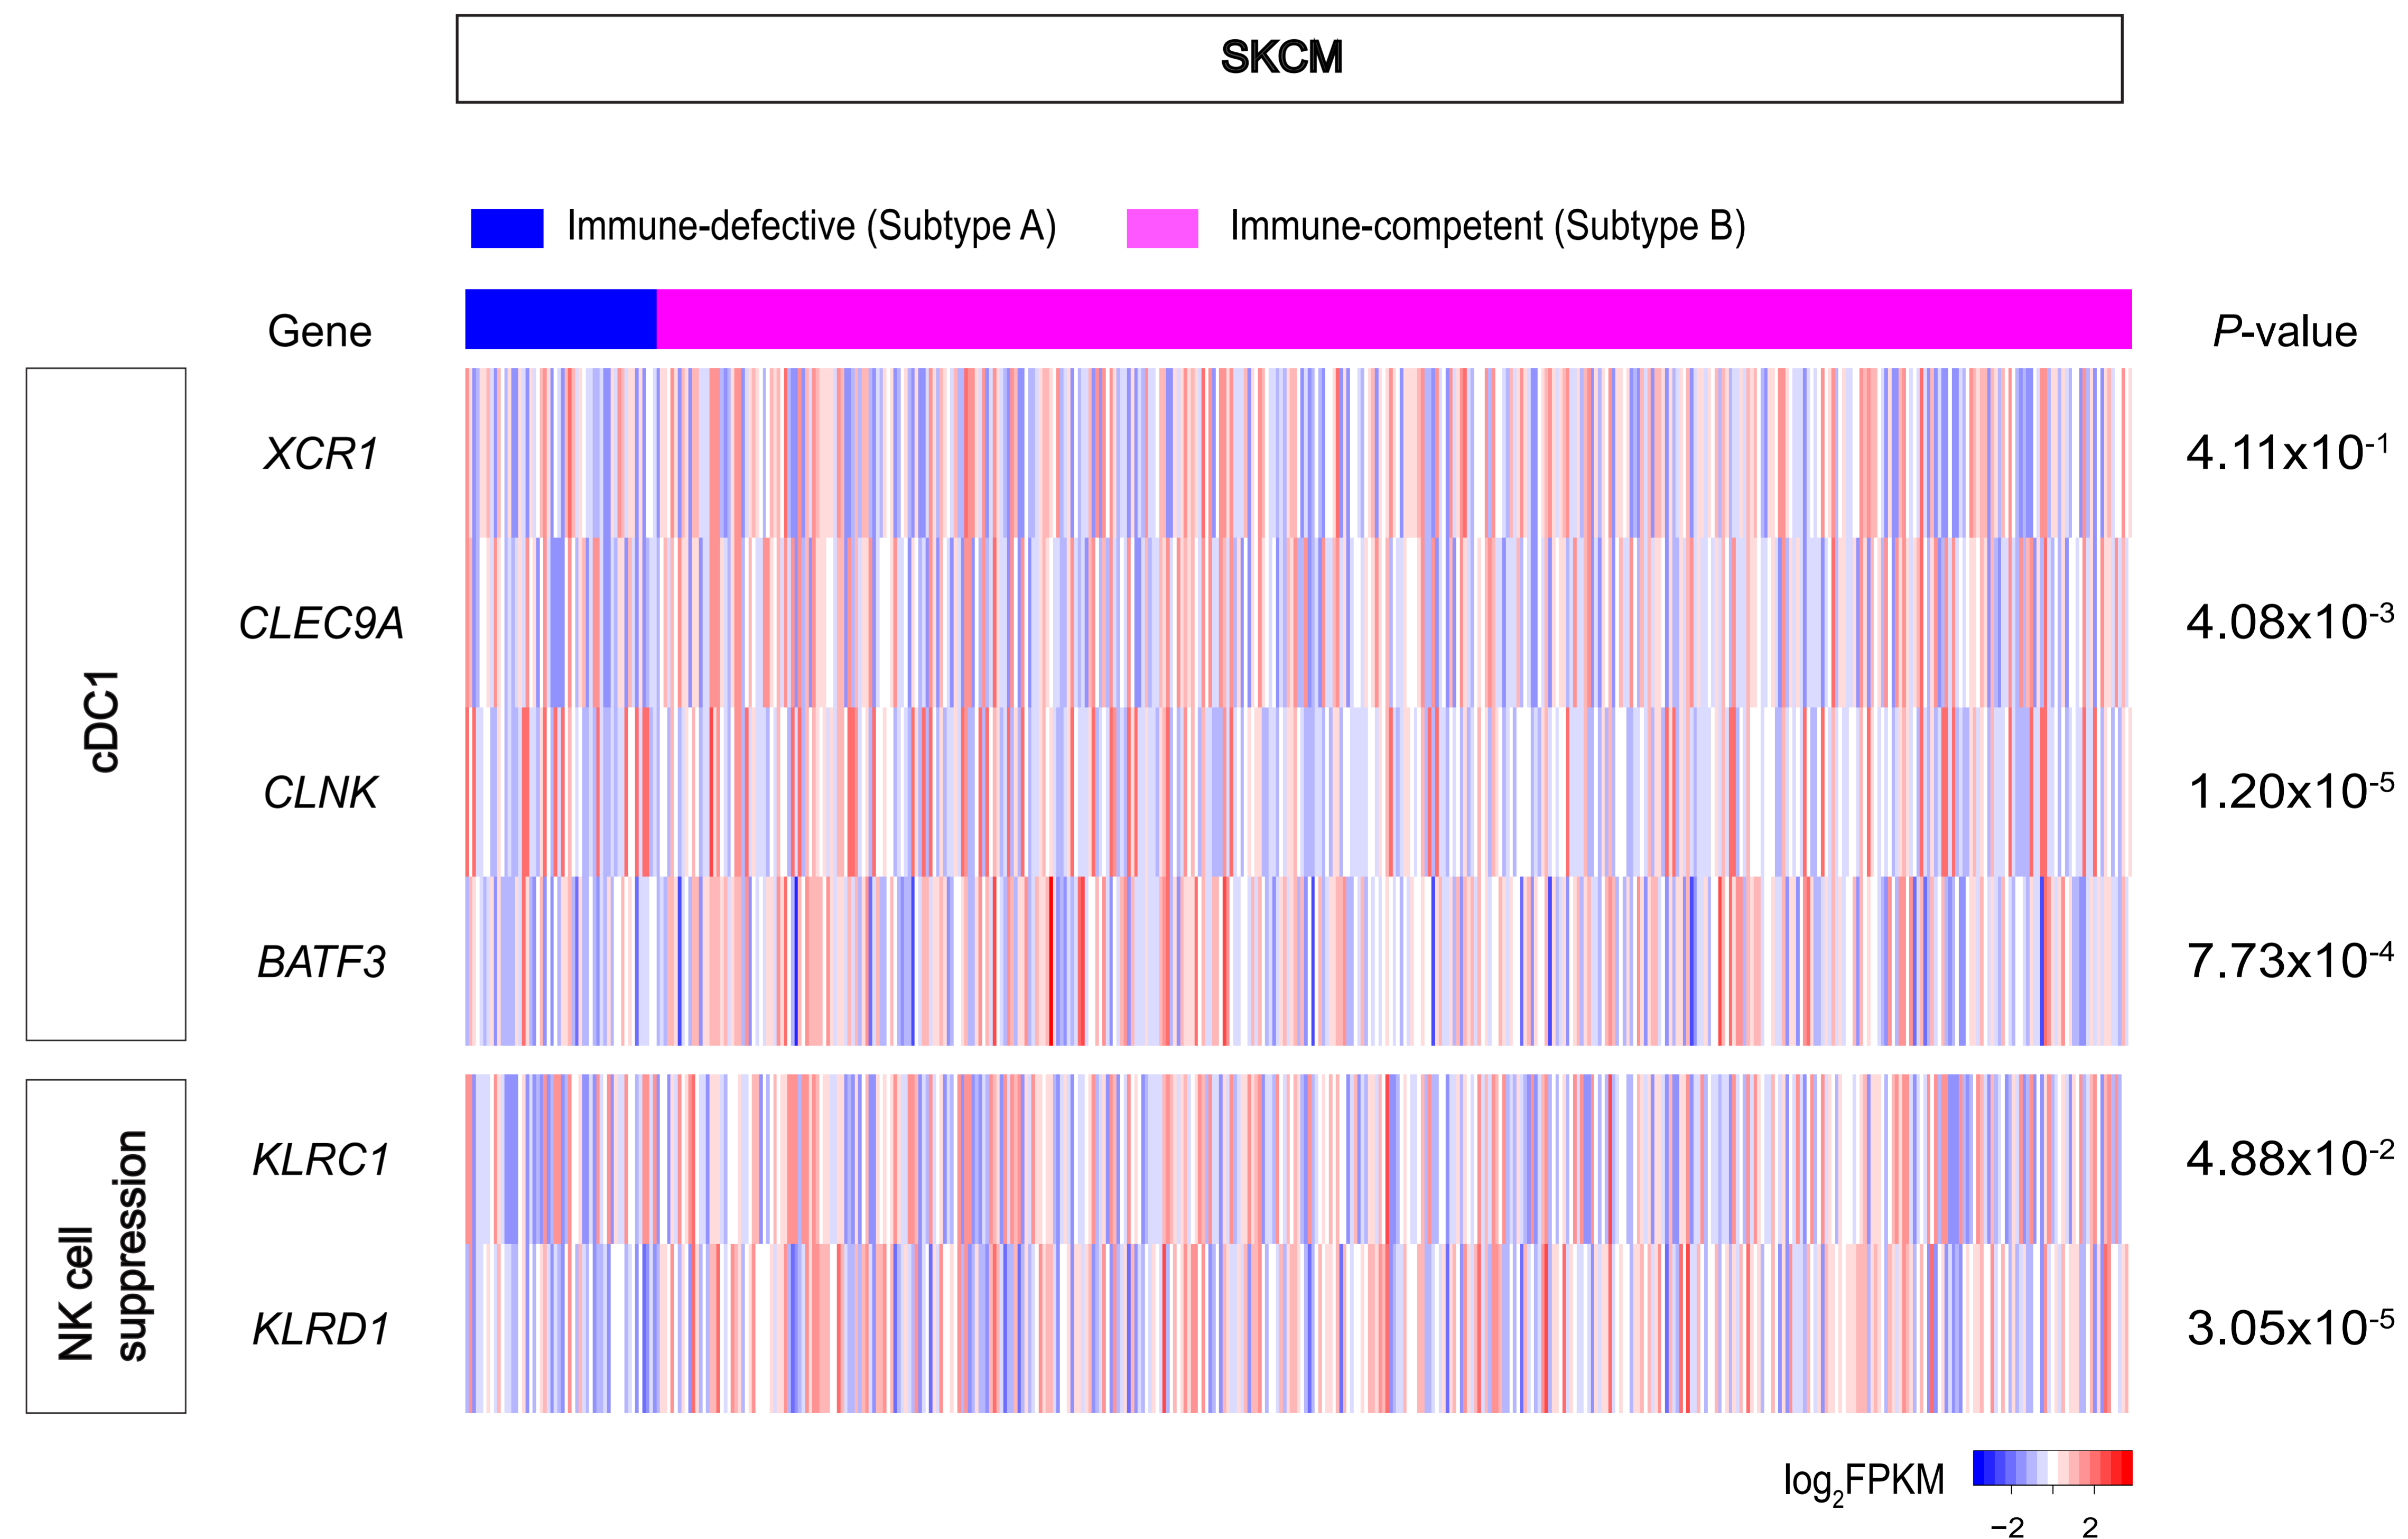

COAD

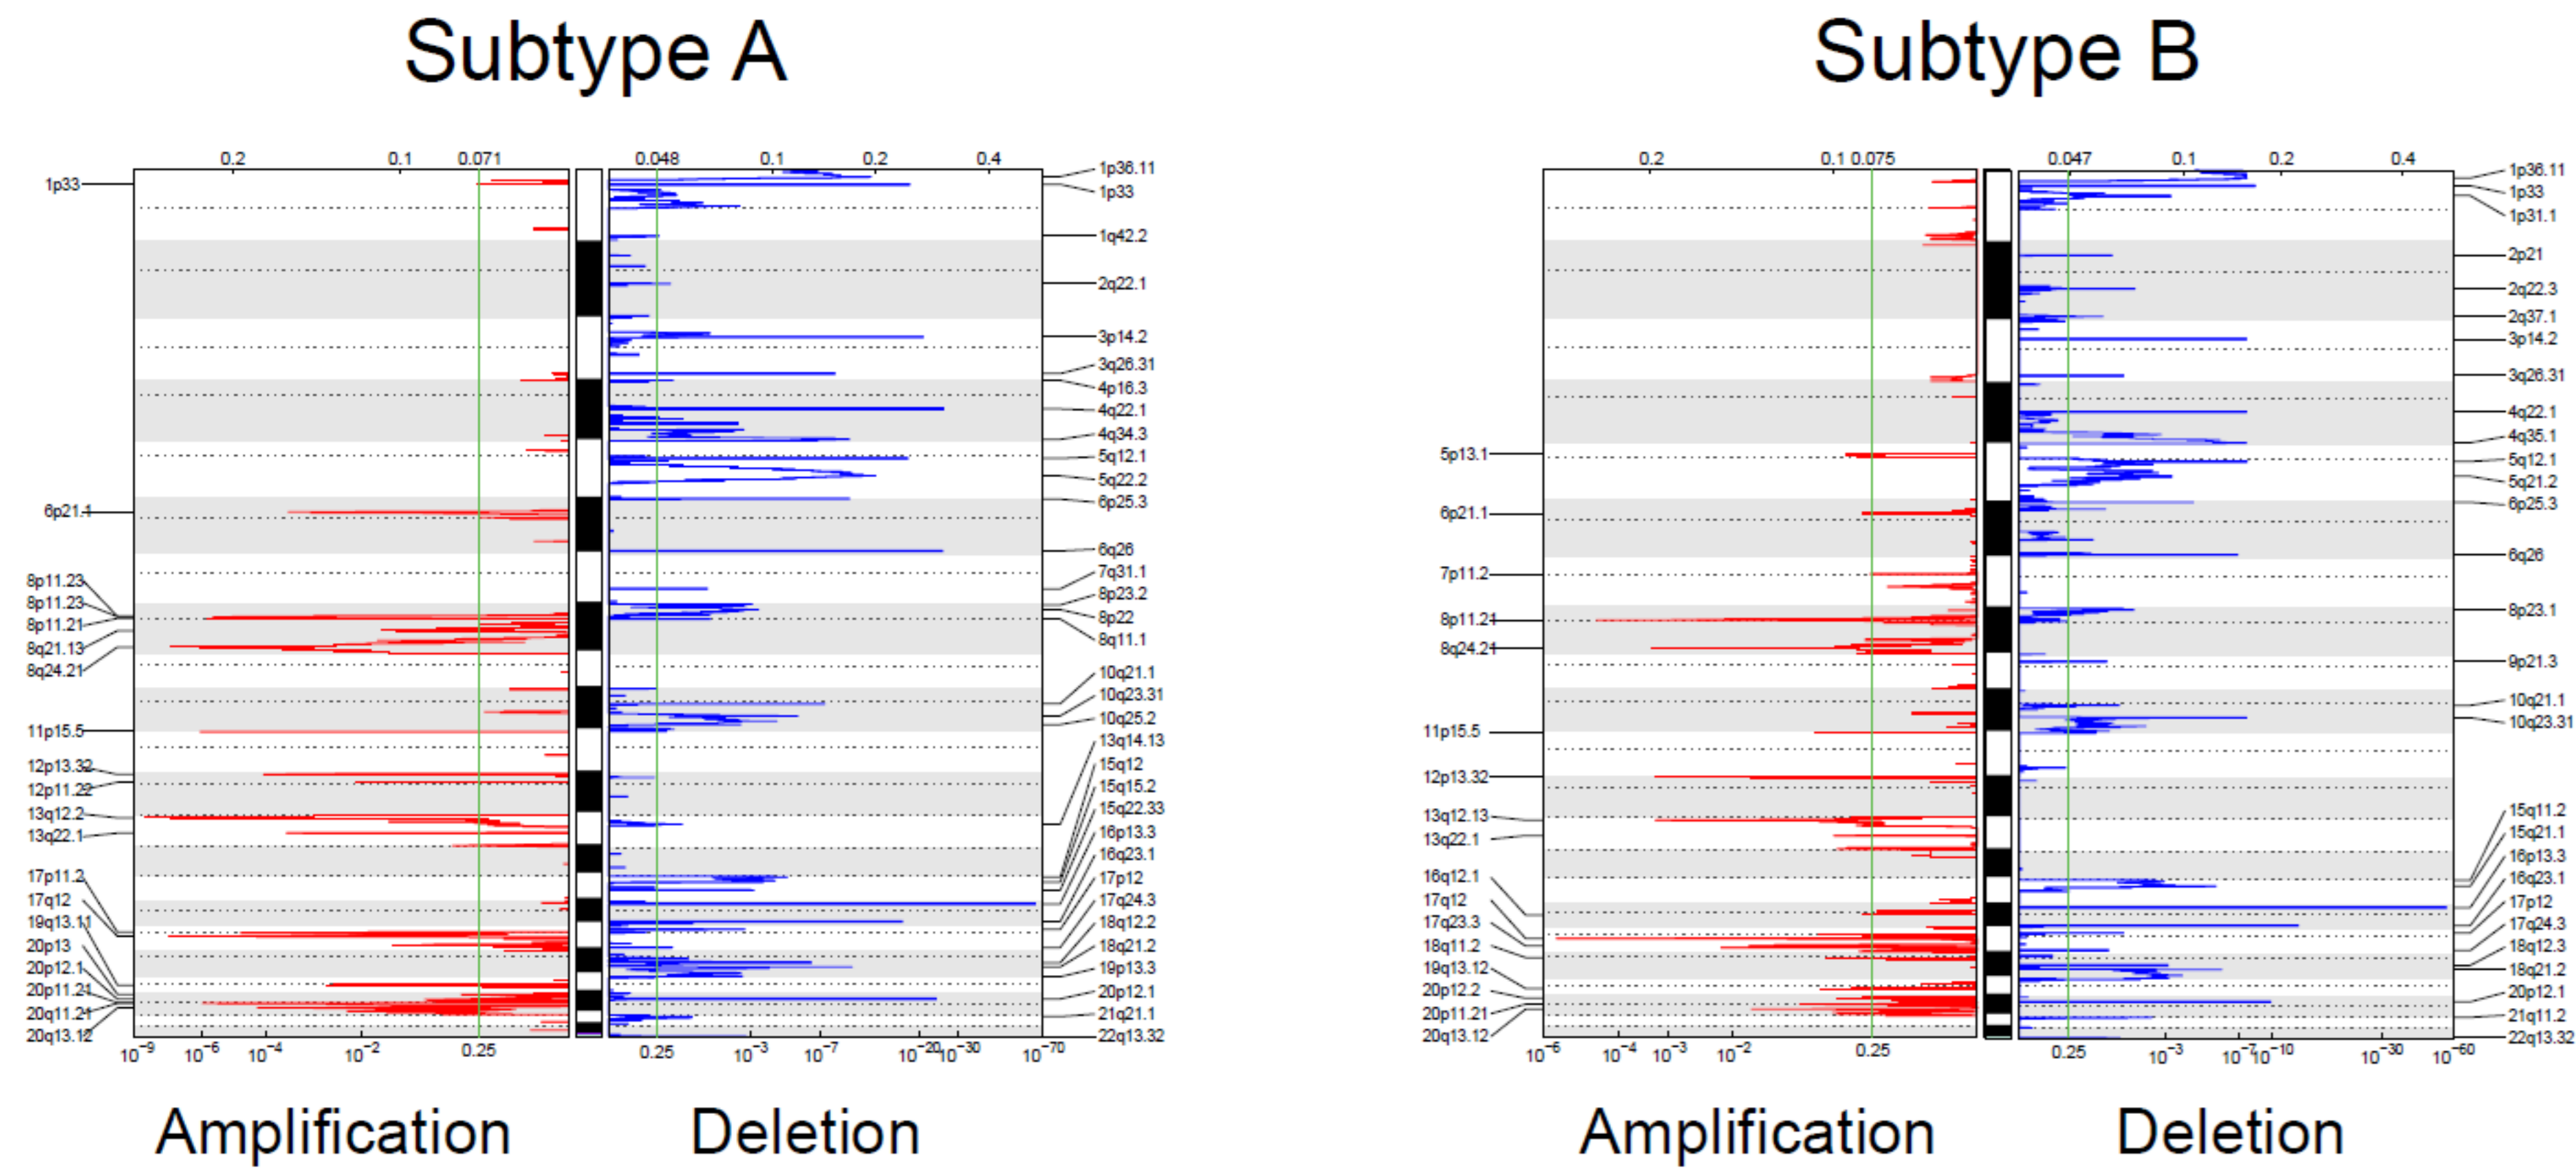

GBM

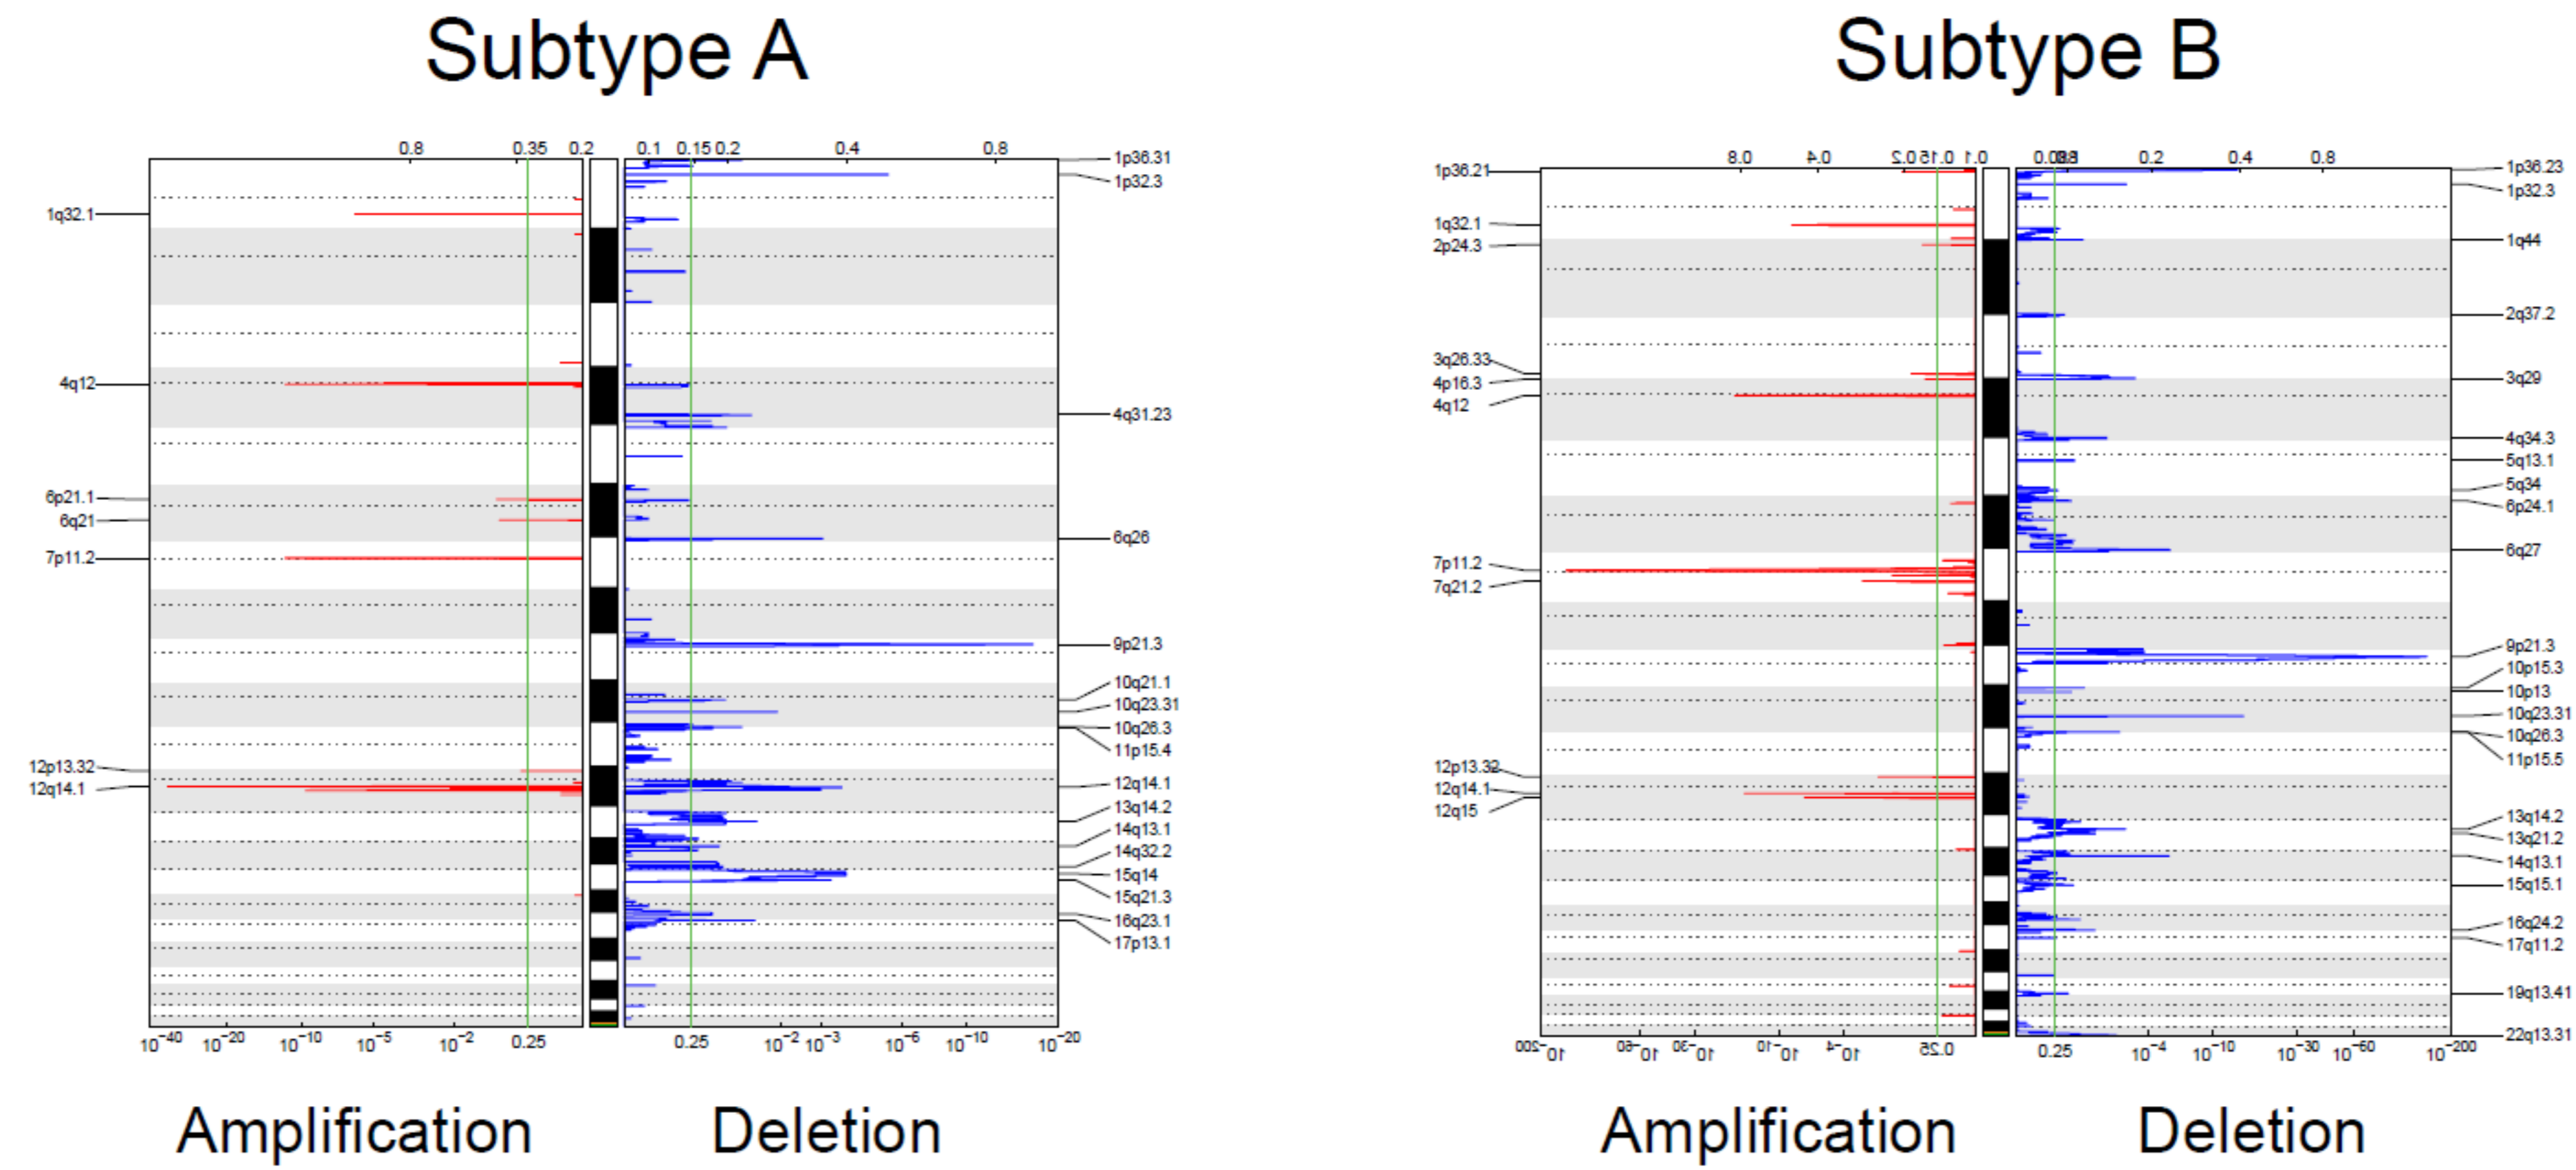

KIRP

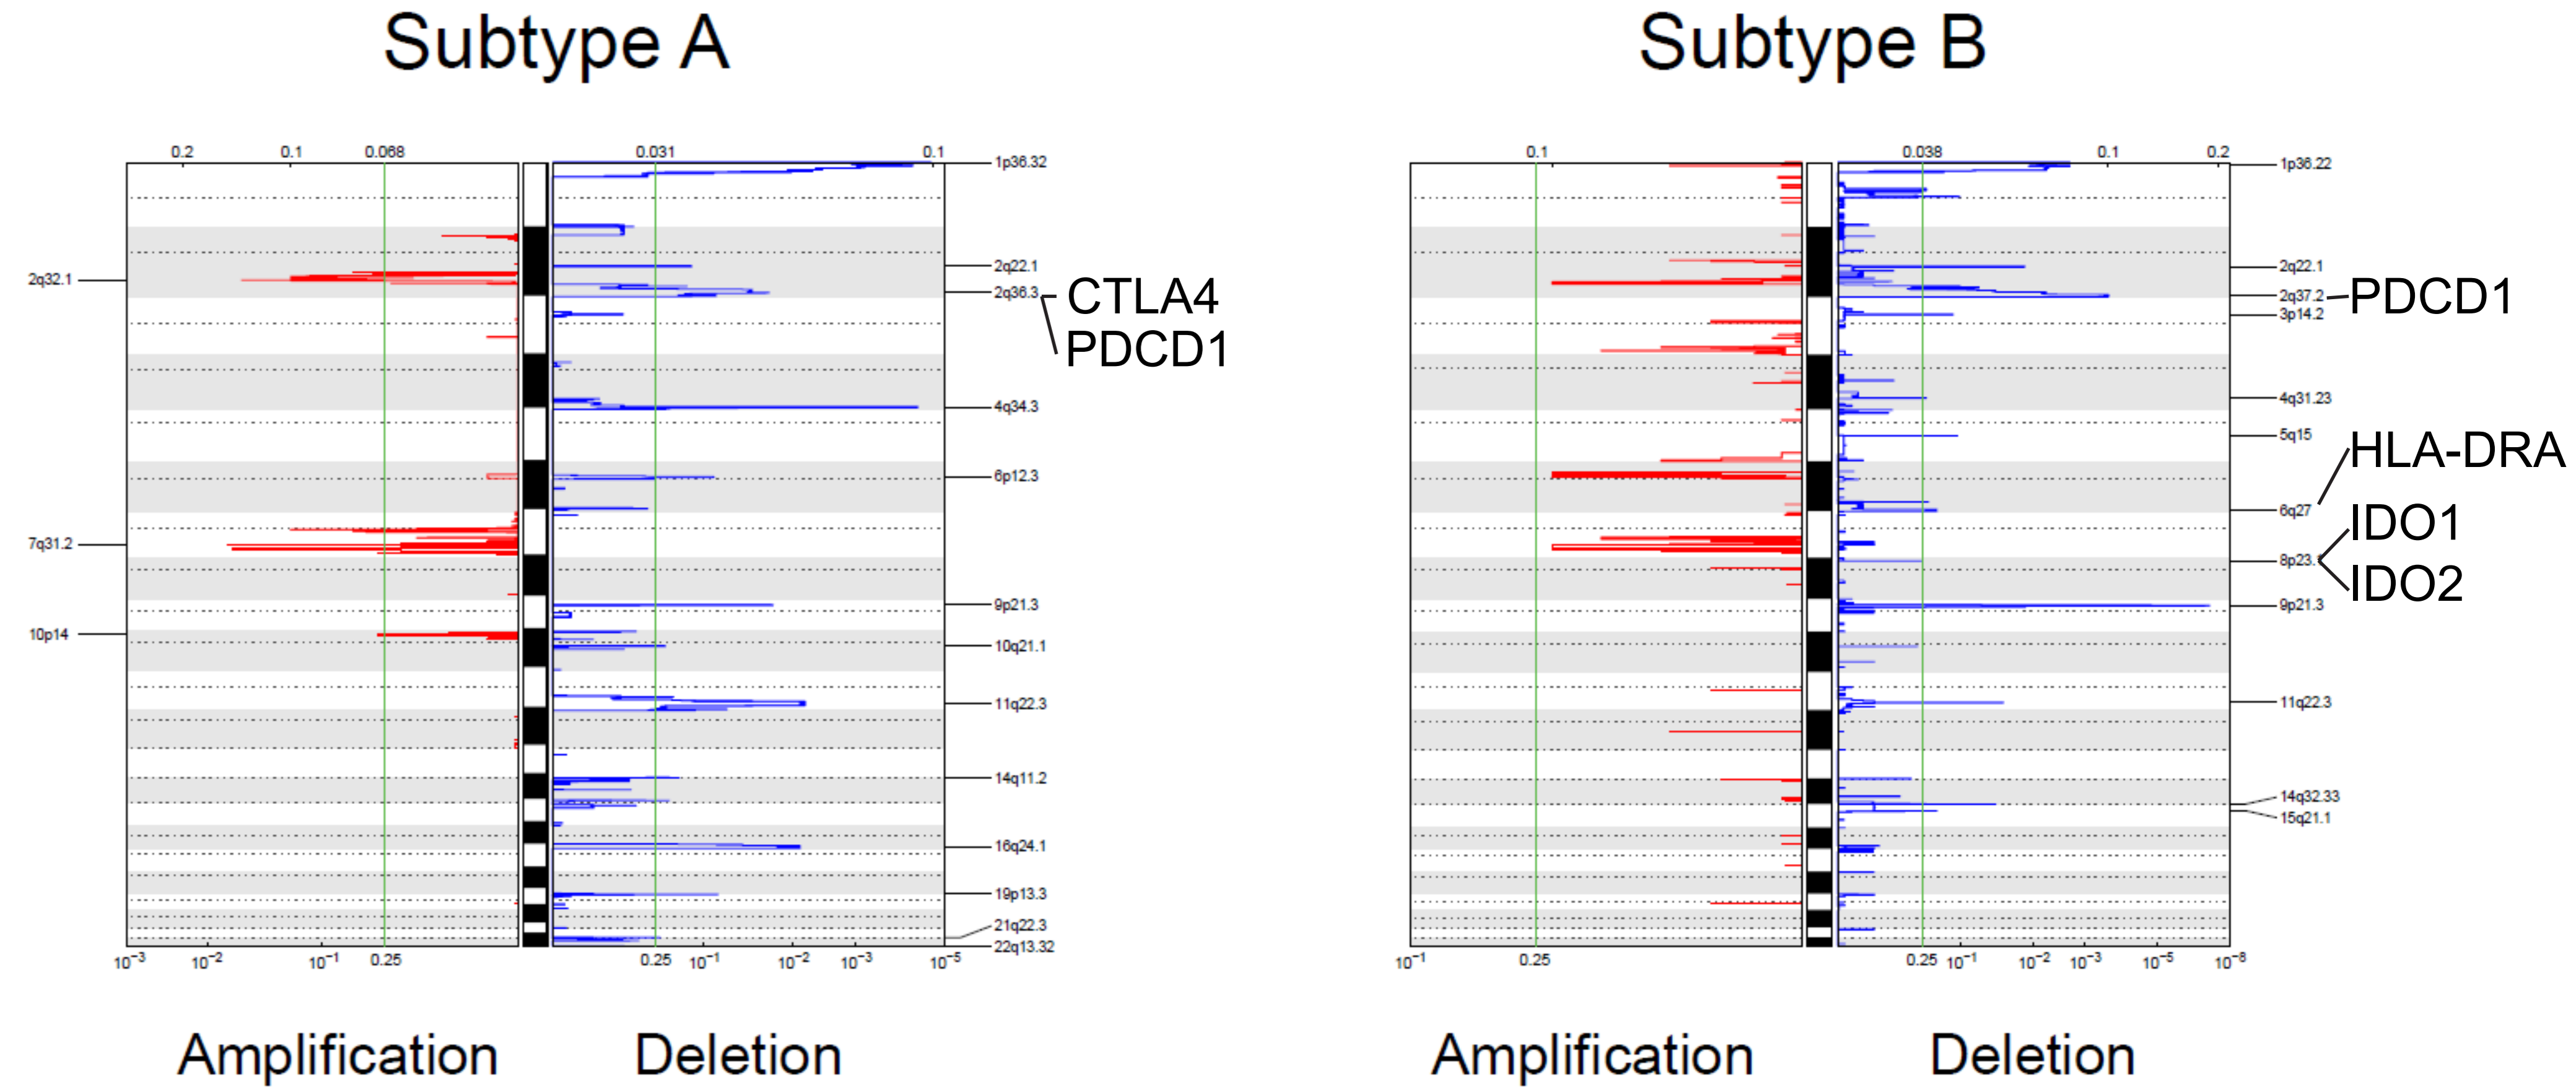

PAAD

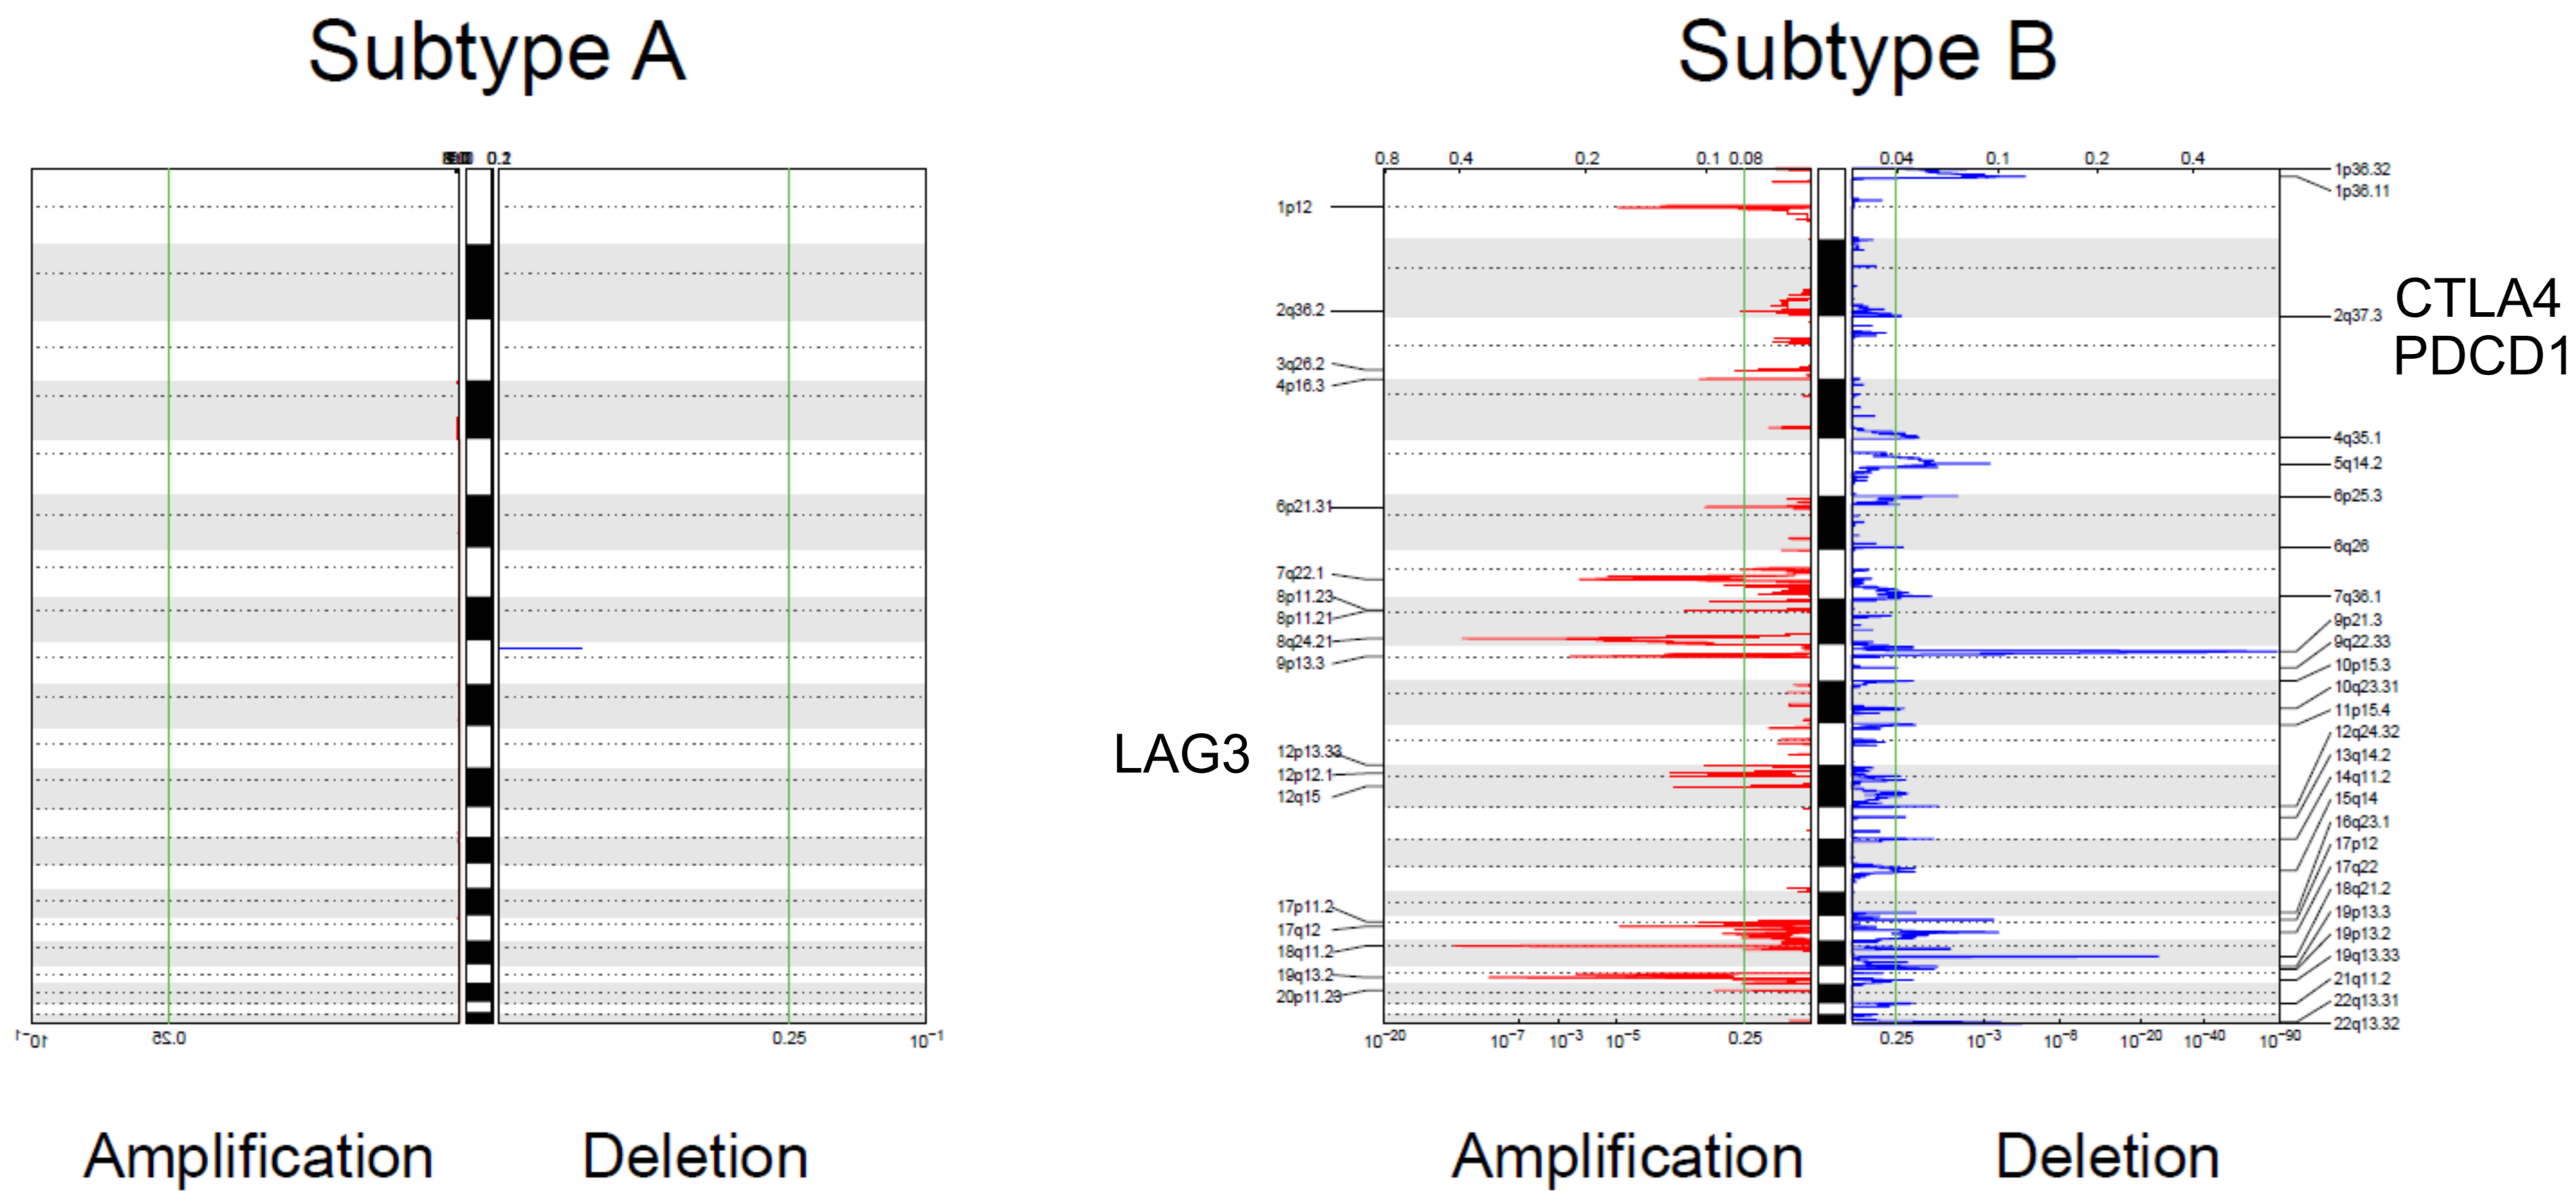

PCPG

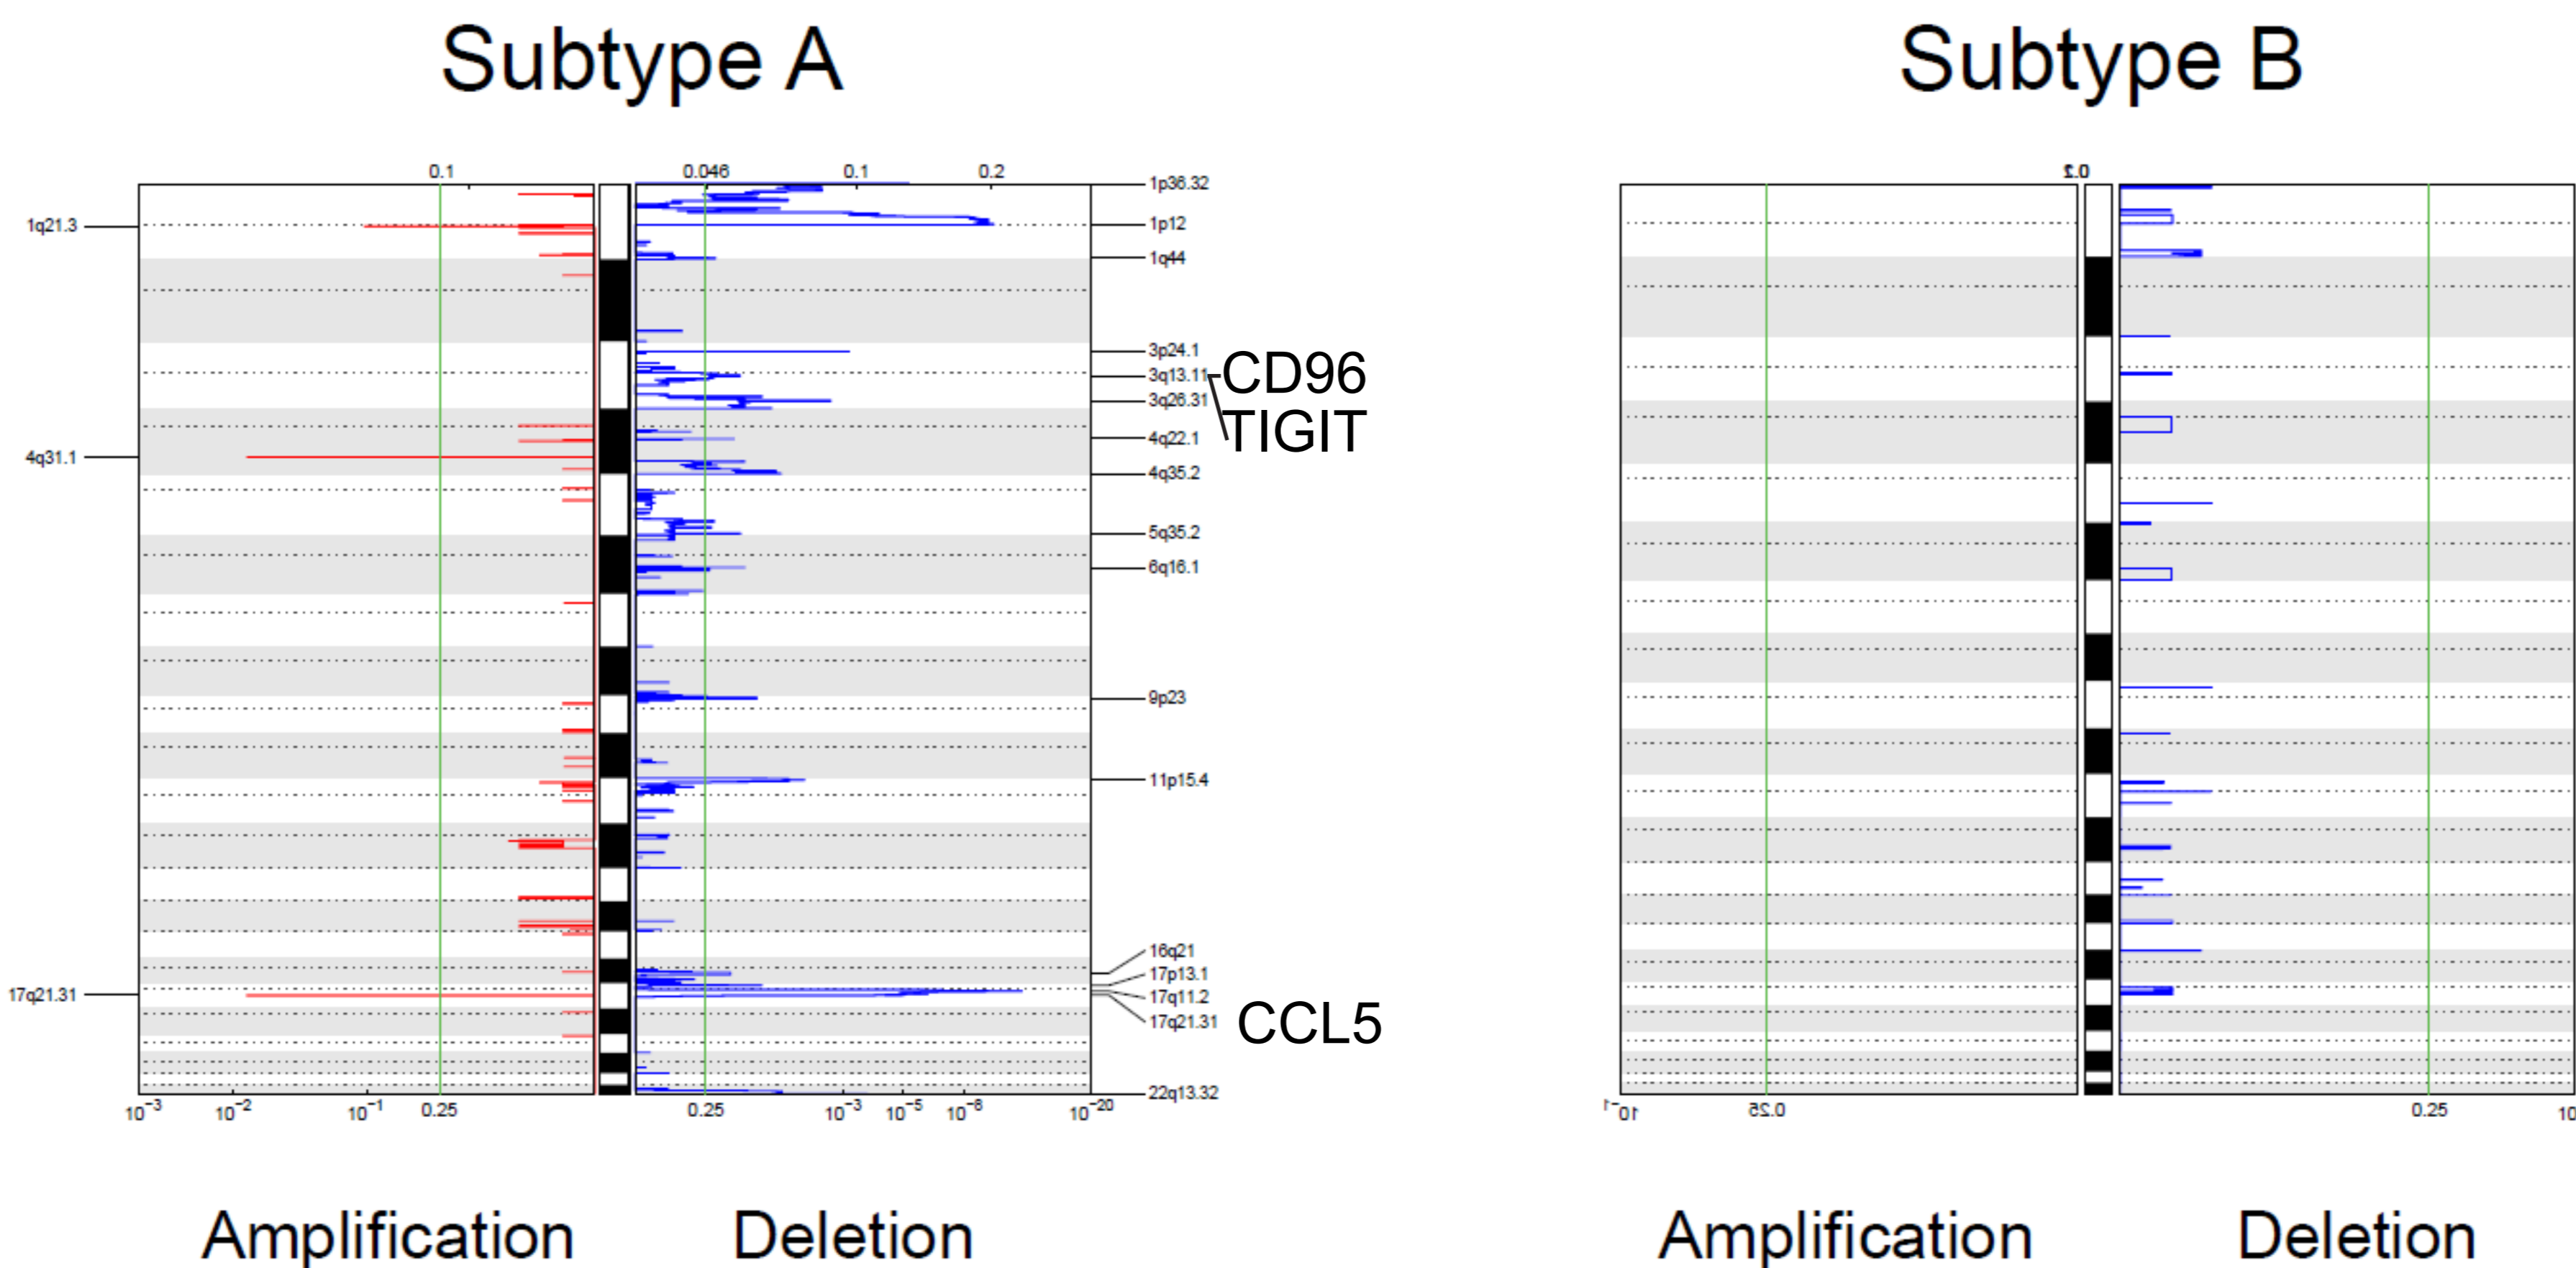

SARC

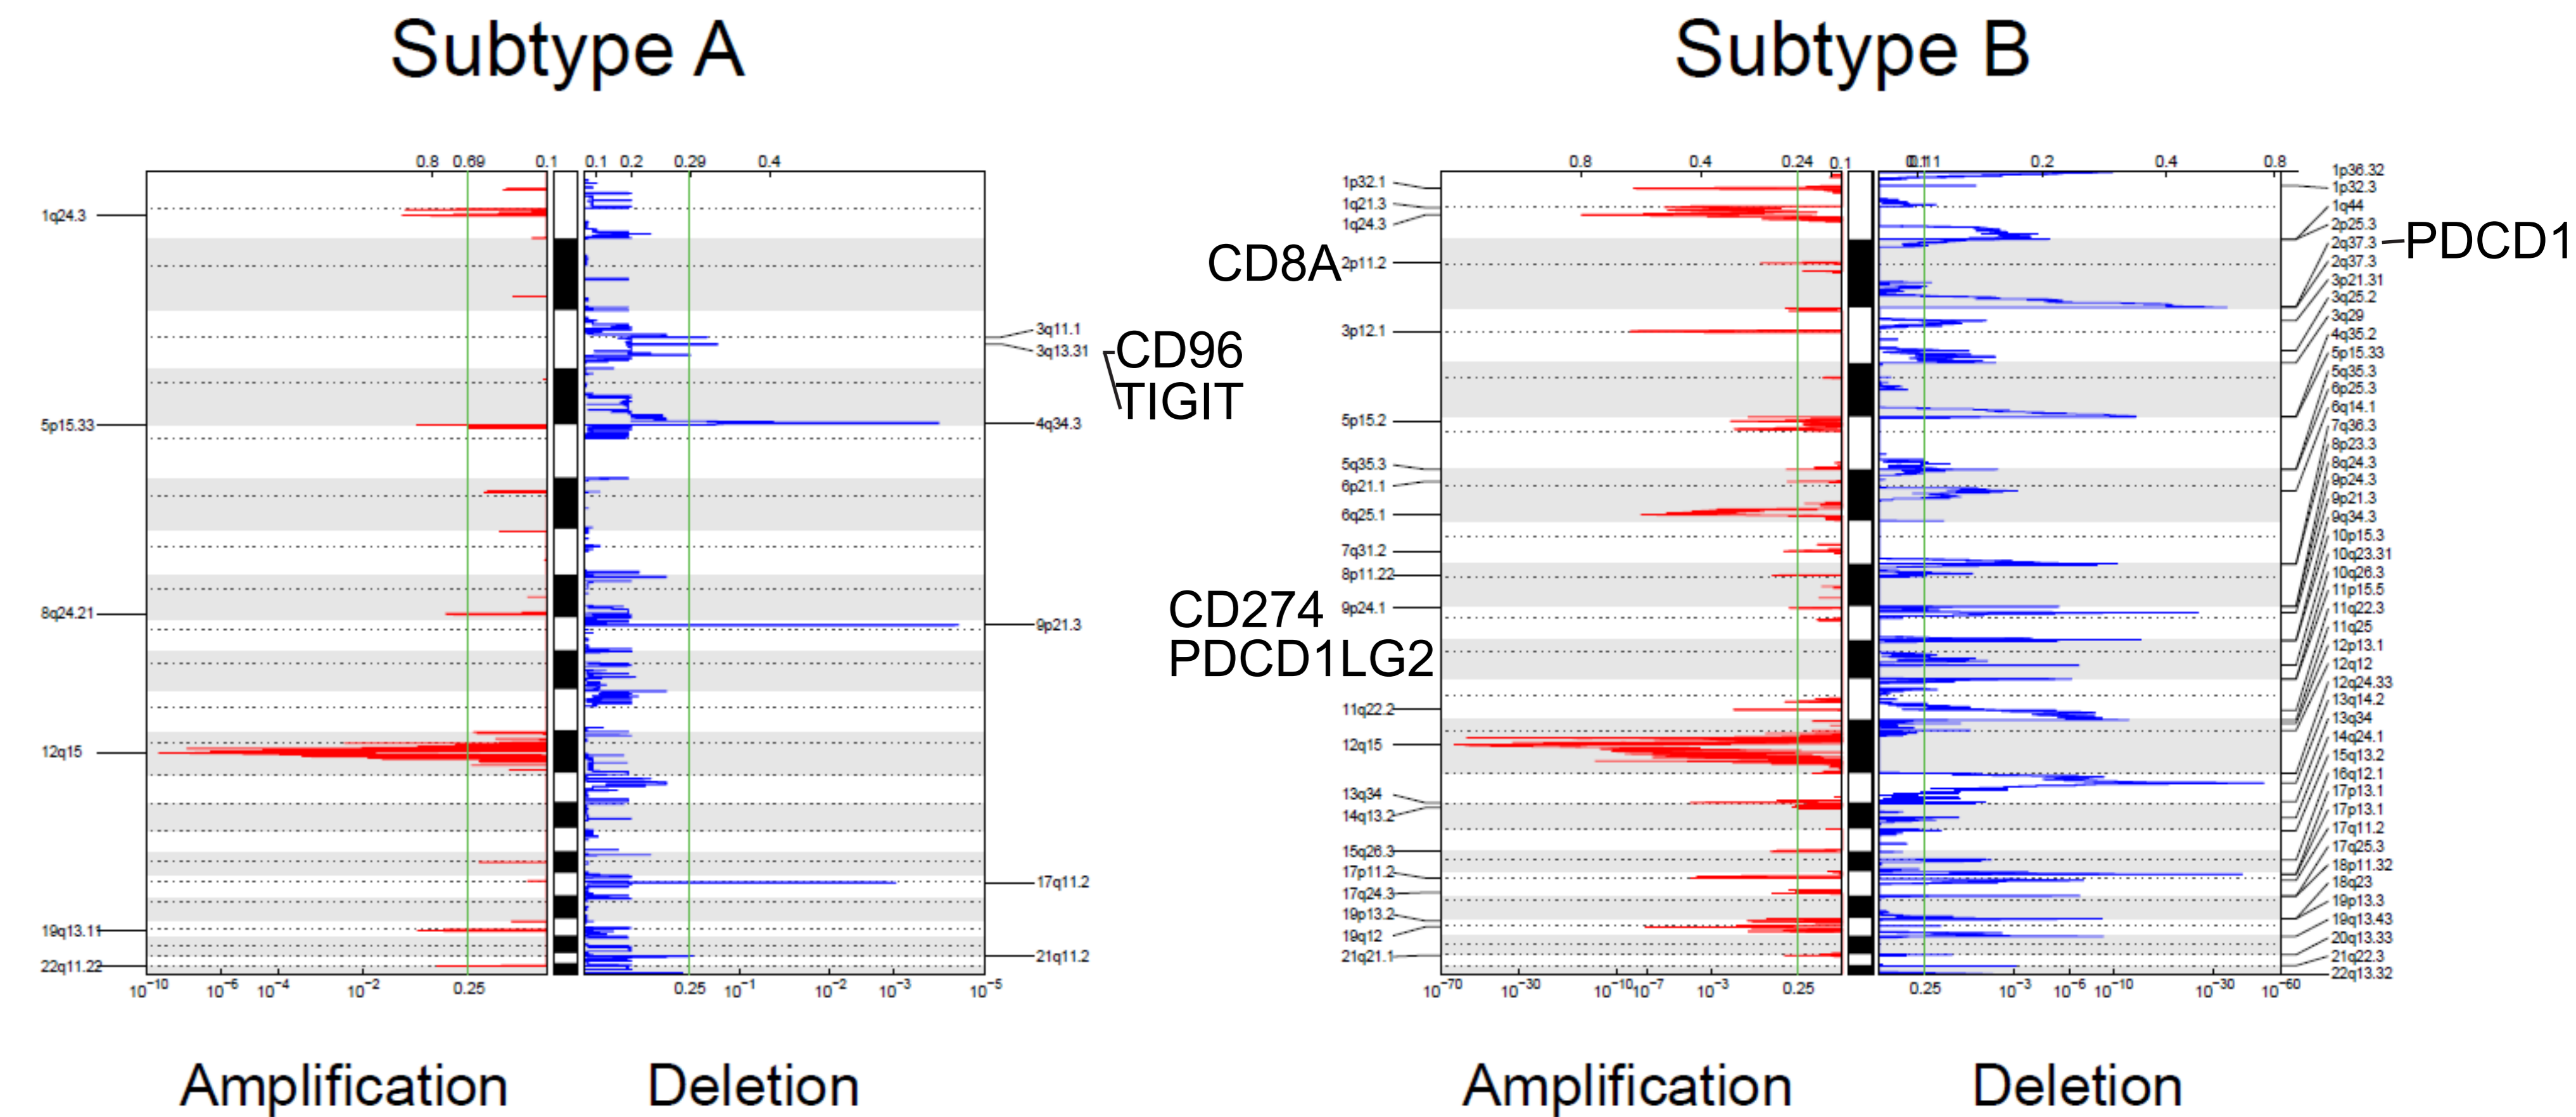

SKCM

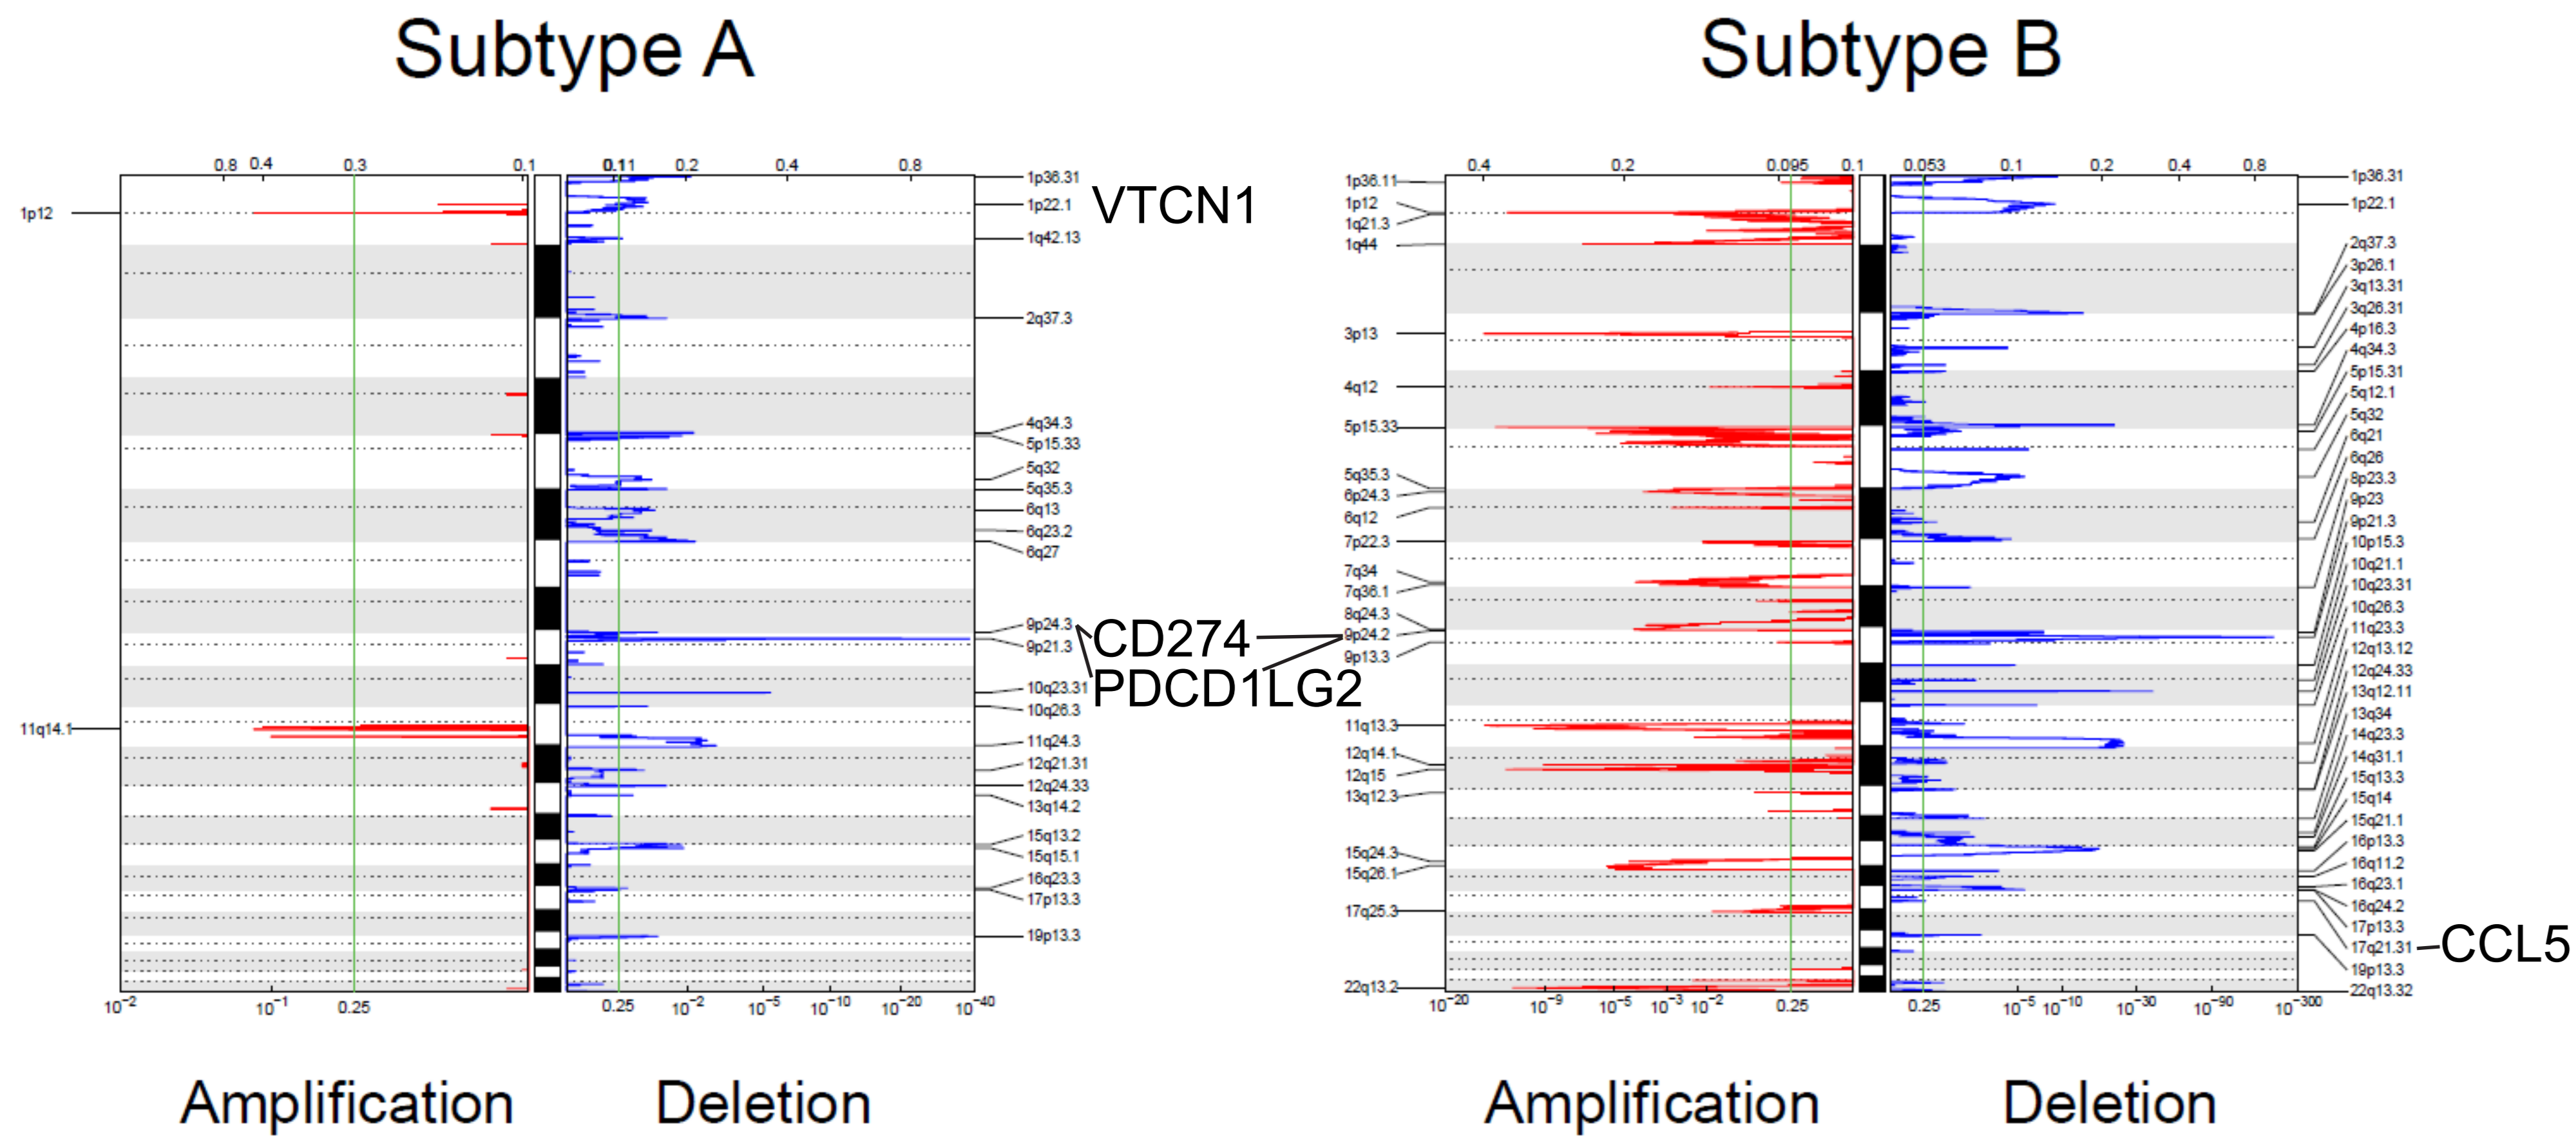

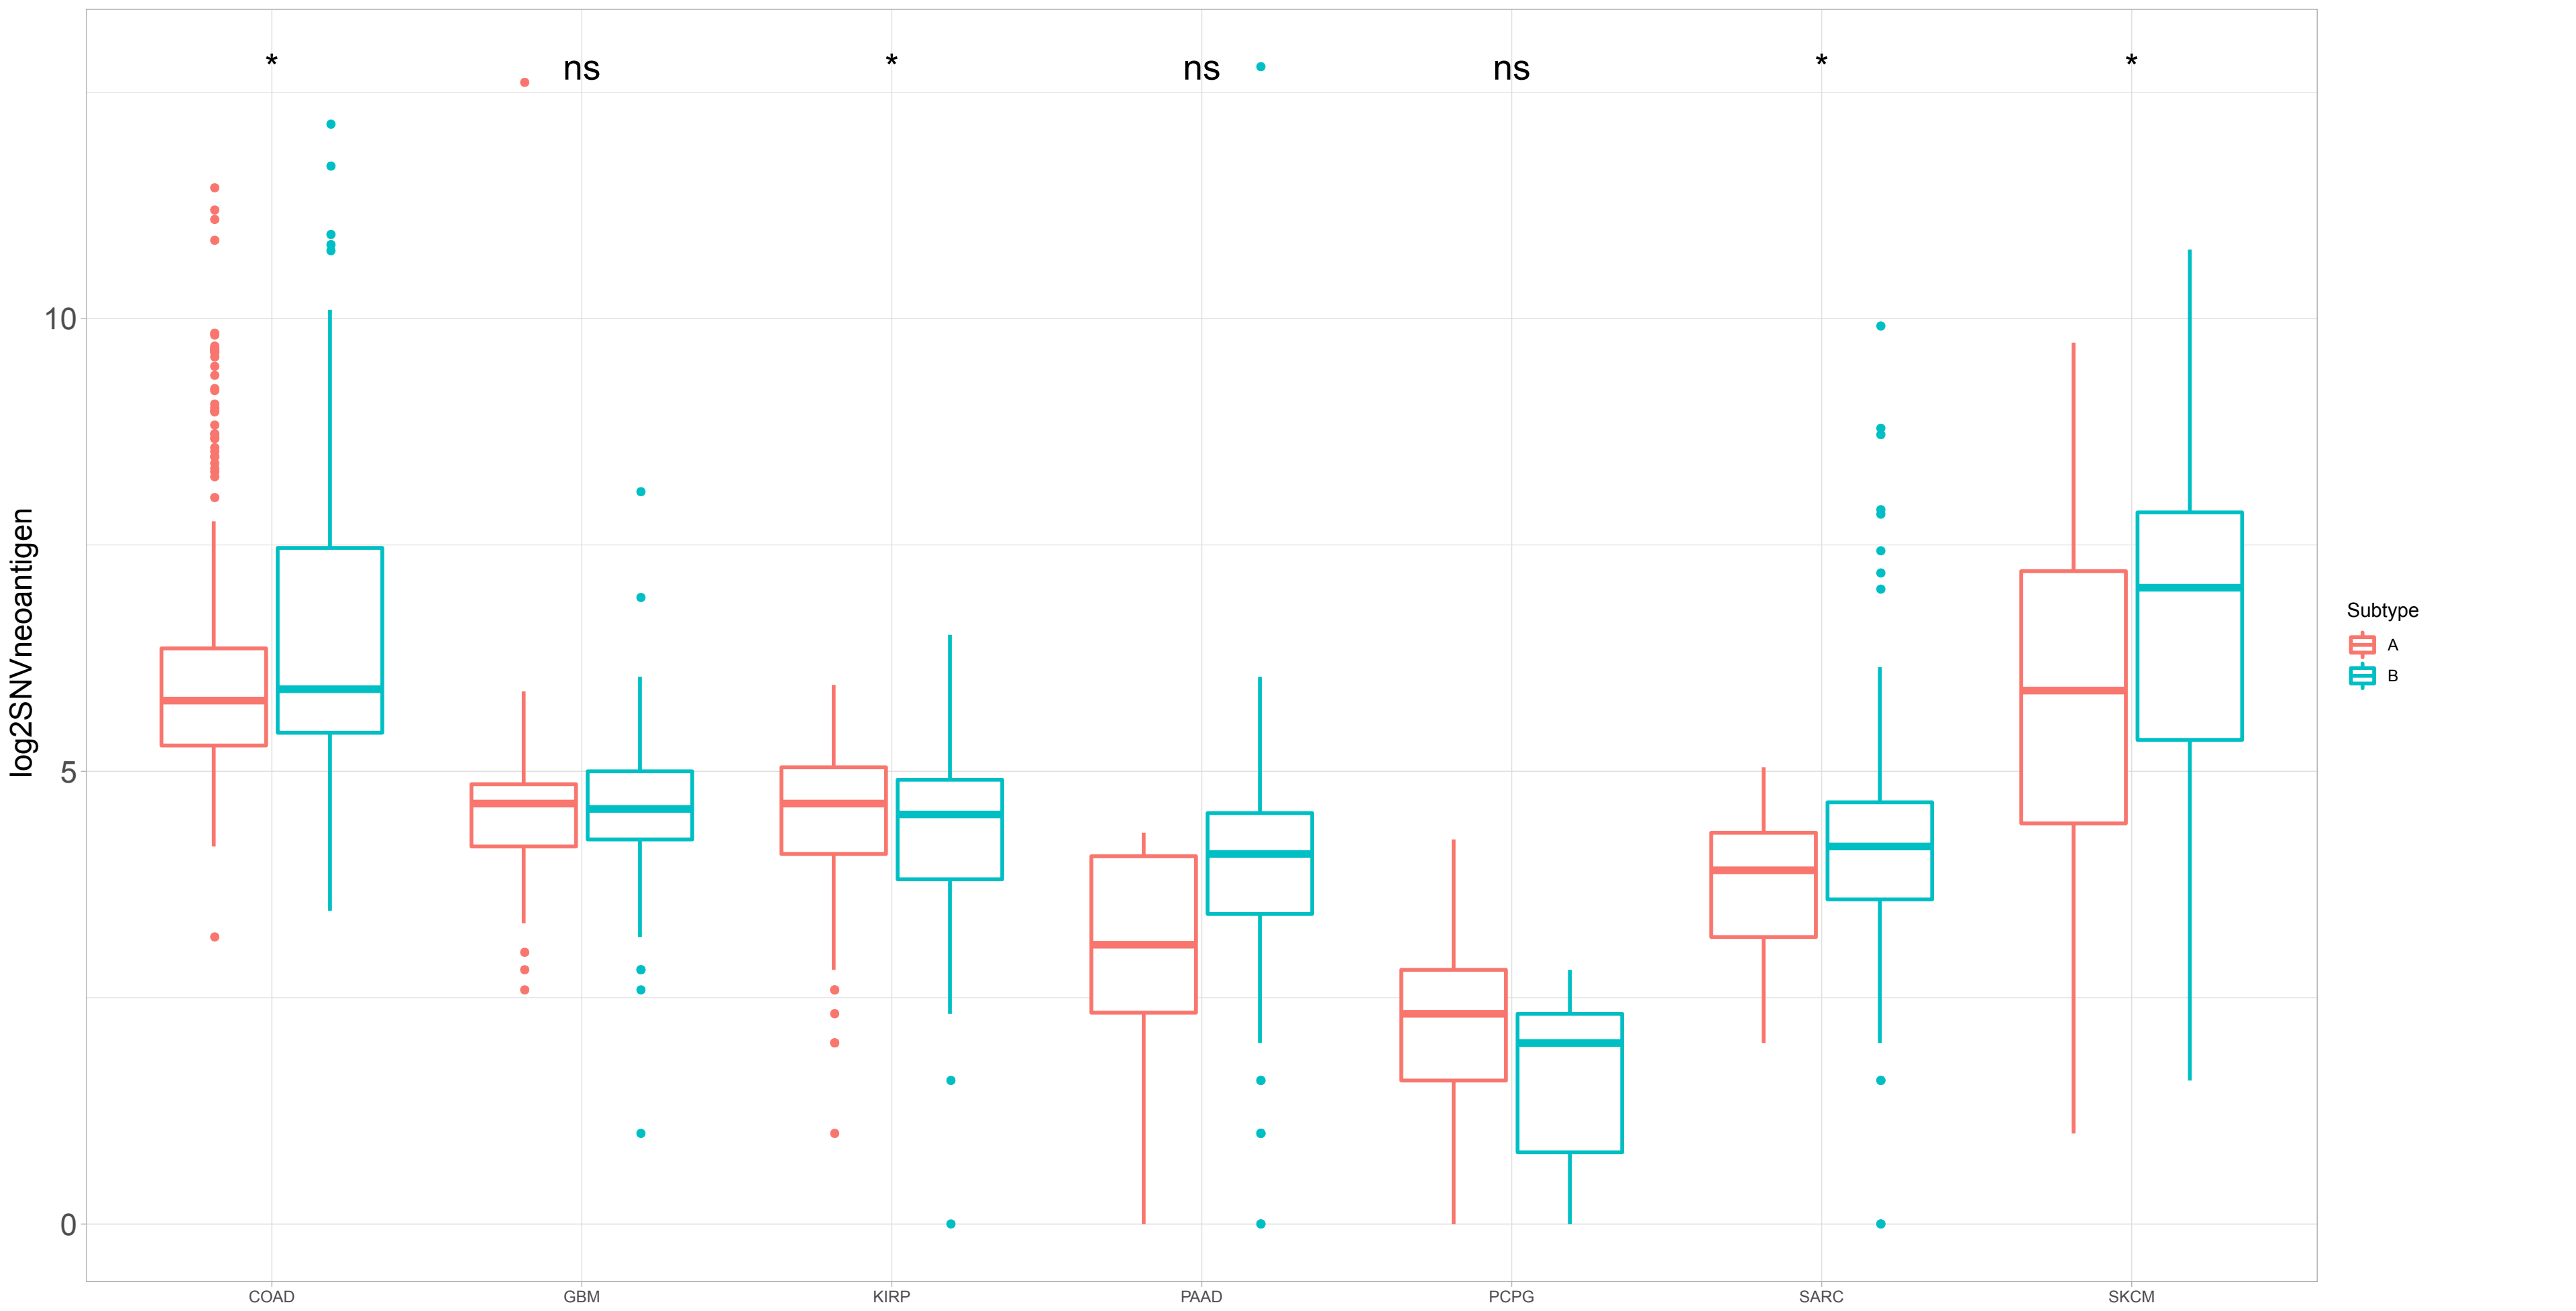

# Immune-deficient subtype (Subtype A)

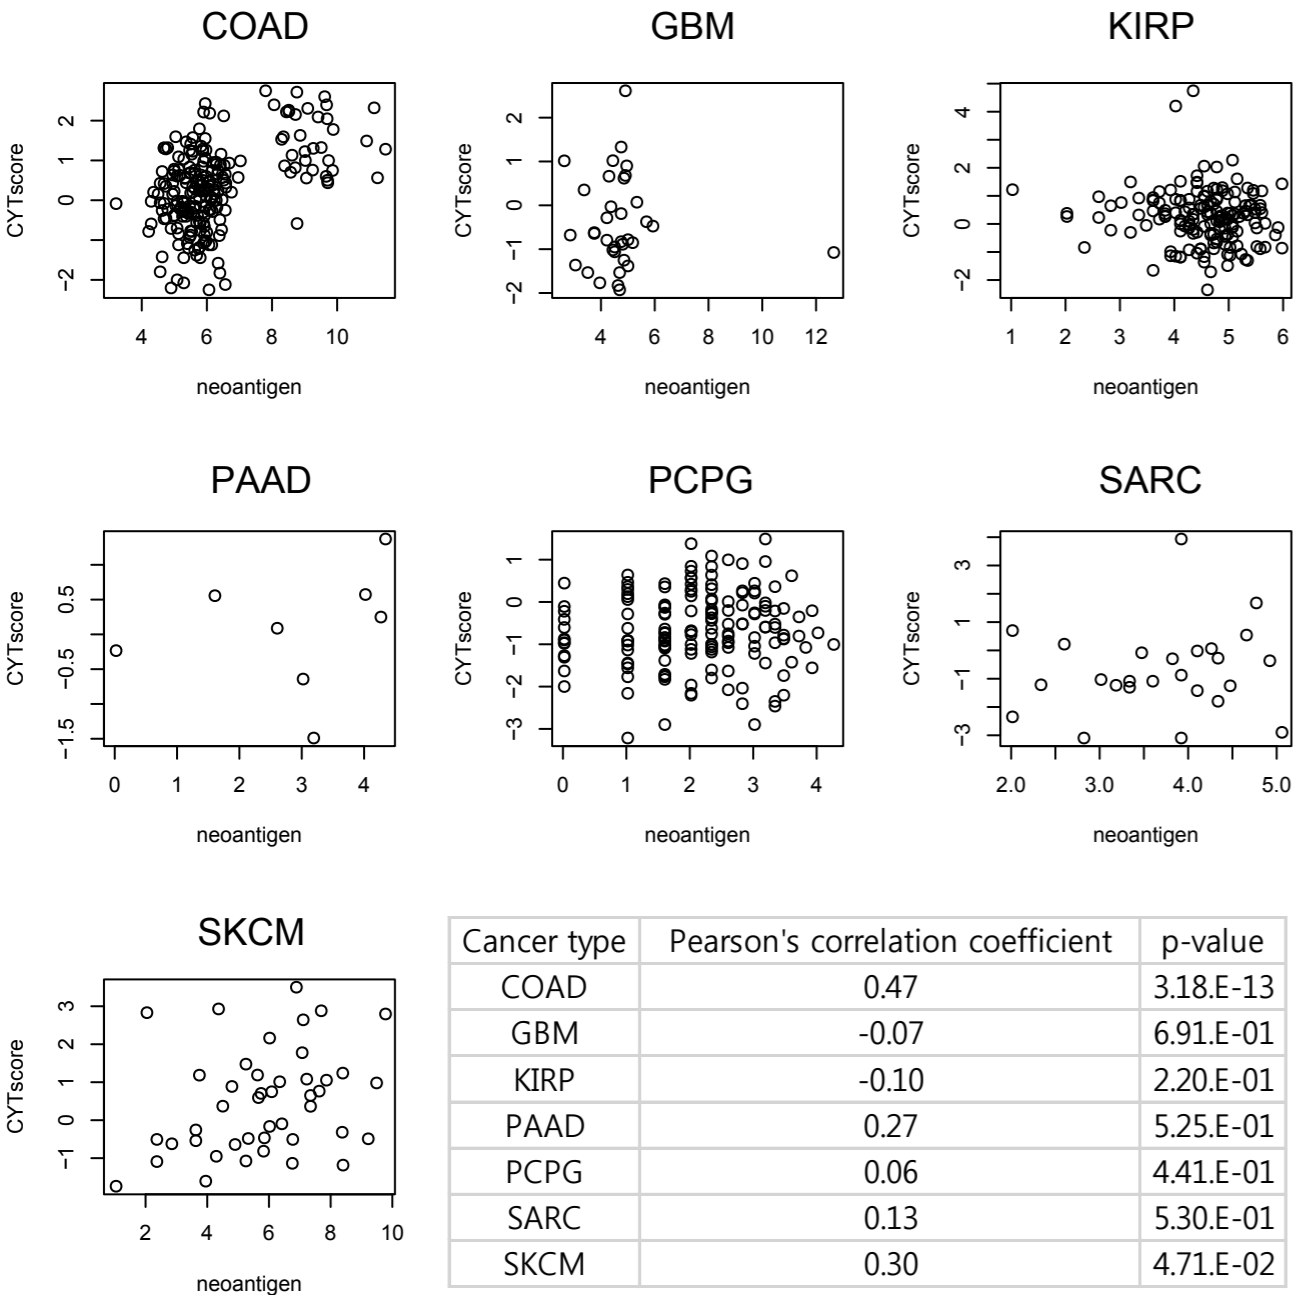

# Immune-competent subtype (Subtype B)

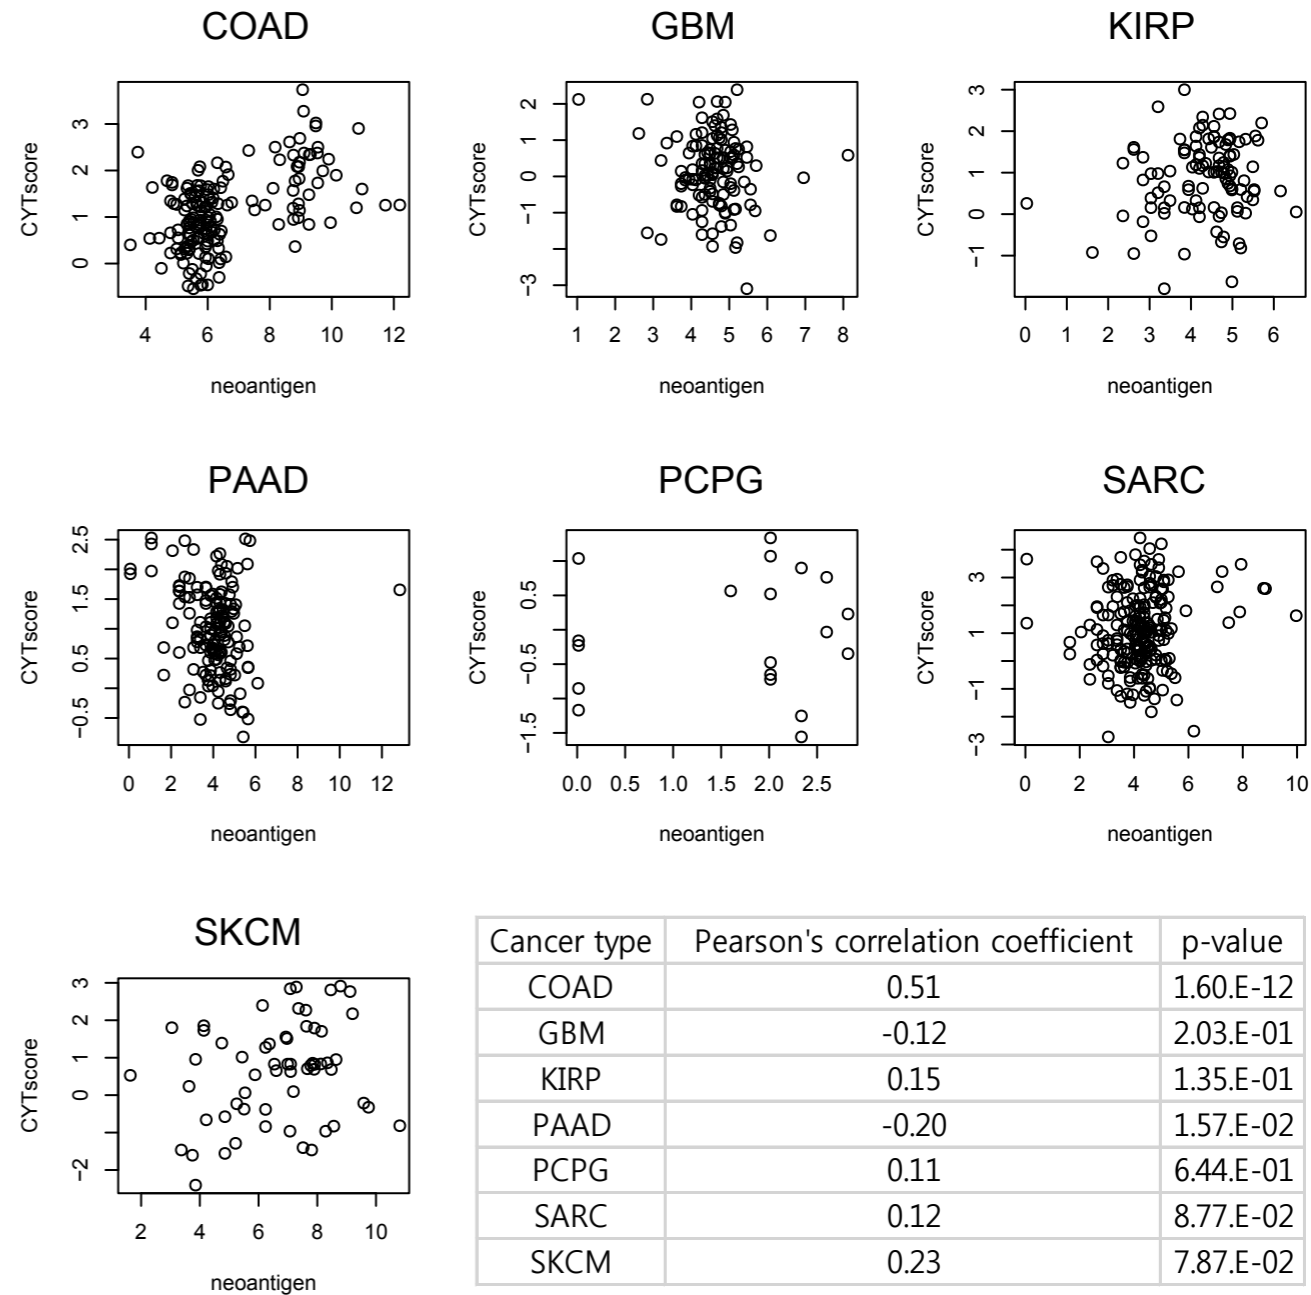

Supplementary Table 1. Top 1,000 most variable genes used for unsupervised hierarchical clustering in

| CHOL     | COAD            | GBM             | KICH      | KIRP     | LIHC     | PAAD            | PCPG     | SARC      |
|----------|-----------------|-----------------|-----------|----------|----------|-----------------|----------|-----------|
| RPS4Y1   | RPS4Y1          | PSPHP1          | NKX6-1    | UMOD     | REG3A    | PNLIP           | RPS4Y1   | RPS4Y1    |
| PLG      | REG1A           | RPS4Y1          | RPS4Y1    | AQP2     | RPS4Y1   | CPA1            | DDX3Y    | DLK1      |
| XIST     | XIST            | XIST            | FXYD4     | RPS4Y1   | MYH4     | CELA3A          | CYP11B1  | RP6-170F5 |
| HP       | CLCA1           | GSTM1           | SPINK1    | XIST     | DLK1     | CTRB2           | XIST     | DES       |
| APOA1    | REG4            | KDM5D           | LHX9      | FABP7    | CPLX2    | CTRB1           | KDM5D    | DDX3Y     |
| APOC3    | OLFM4           | IRX1            | DDX3Y     | SLC12A1  | CYP3A4   | CPB1            | USP9Y    | MYH11     |
| MTRNR2L1 | REG3A           | DDX3Y           | XIST      | FGB      | PLA2G2A  | CLPS            | HSD3B2   | PCP4      |
| TXLNG2P  | DUSP27          | SAA1            | SST       | DDX3Y    | PGC      | CELA3B          | EIF1AY   | KDM5D     |
| APOA2    | REG1B           | LTF             | PSCA      | KNG1     | CYP2A6   | CPA2            | SST      | MYOCD     |
| KDM5D    | DDX3Y           | EIF1AY          | ATP1A3    | FGG      | APOA4    | REG1B           | NLGN4Y   | MMP13     |
| DDX3Y    | ITLN1           | USP9Y           | USP9Y     | TMEM213  | REG1A    | CELA2A          | TXLNG2P  | PLA2G2A   |
| ADH4     | TXLNG2P         | UTY             | KDM5D     | KDM5D    | CYP2E1   | AMY2A           | ADCYAP1  | COL11A1   |
| AGXT     | MUC2            | TXLNG2P         | TMPRSS11  | USP9Y    | XIST     | REG3A           | KIAA0125 | XIST      |
| OLFM4    | ZG16            | SAA2            | UNC5D     | ATP6V0A4 | CYP1A2   | CTRC            | PNMT     | CAPN6     |
| USP9Y    | KDM5D           | H19             | AQP6      | SLC6A19  | SPINK1   | PNLIPRP2        | UTY      | EIF1AY    |
| SULT2A1  | SPINK4          | TTTY15          | TMEM52B   | CLDN8    | C9       | SYCN            | TTTY15   | TXLNG2P   |
| SERPINC1 | PRAC            | CDKN2A          | RP6-170F5 | PLG      | DCAF4L2  | GP2             | NPY      | ACTC1     |
| SLC6A19  | IGHA2           | ZFY             | CRTAC1    | SLC6A3   | PEG10    | PRSS1           | CYP17A1  | MYOC      |
| AGR2     | PIGR            | TBX5            | SALL3     | SAA1     | GSTM1    | PNLIPRP1        | ZFY      | GREM1     |
| EIF1AY   | SLC26A3         | DLX6-AS1        | EIF1AY    | FXYD4    | DDX3Y    | PLA2G1B         | CYP21A2  | CHRD12    |
| APOA5    | DEFA5           | PI3             | LINC00645 | RHCG     | IGF2     | CEL             | NGB      | ACTG2     |
| HMGCS2   | LCN15           | IGKC            | HHATL     | UTY      | CRP      | GCG             | CRH      | COMP      |
| GSTA1    | DMBT1           | IGHG1           | PAH       | TXLNG2P  | ALDH3A1  | XIST            | PCDH11Y  | NLGN4Y    |
| MUC5B    | EIF1AY          | SAA2-SAA4       | SCG3      | AC079466 | RP11-51M | REG3G           | GNG8     | USP9Y     |
| C9       | IGF2            | C6orf15         | CHL1      | SLC22A6  | MAGEA3   | RPS4Y1          | ECEL1    | SCARA5    |
| FDCSP    | UGT2B17         | PLA2G2A         | VSIG2     | EIF1AY   | EEF1A2   | ENSG00000100000 | ARHGAP36 | IGHG1     |
| F9       | RN7SK           | LINC00689       | CALCA     | FGA      | AKR1B10  | REG1A           | AQP2     | TCEAL2    |
| AHSG     | CTSE            | POSTN           | CYS1      | SLC4A1   | PAGE4    | INS             | POU3F3   | CES1      |
| KLK11    | RPL41P1         | NLGN4Y          | SERPINA5  | SCNN1G   | CYP2A7   | DDX3Y           | GSTA1    | PI16      |
| EVPL     | MUC17           | RNA45S5         | GALR1     | ZFY      | SSX1     | KDM5D           | CACNG7   | IGKC      |
| UTY      | MUC5AC          | GPR17           | POU3F4    | FOXI1    | EIF1AY   | PGC             | CNTNAP4  | LRRC15    |
| KRT6B    | MUC5B           | OPALIN          | CRH       | ALDOB    | KDM5D    | CELA2B          | MTRNR2L1 | UTY       |
| CEACAM7  | PLA2G2A         | IGHG2           | UTY       | PPP1R1A  | MAGEA6   | PPY             | SLC32A1  | PRAME     |
| PRAME    | DEFA6           | IGHA1           | TXLNG2P   | MTRNR2L1 | MUC5B    | TXLNG2P         | CHRM1    | DCX       |
| CPLX2    | NOTUM           | NNAT            | ADH4      | REG1A    | HSD17B13 | REG1P           | GAL      | ZFY       |
| DLK1     | CEL             | ENSG00000100000 | PIK3C2G   | CYP4A11  | MME      | REG4            | NR5A1    | ADH1B     |
| ALB      | CLCA4           | IGKV4-1         | CHRM1     | AC019117 | KRT23    | USP9Y           | TMEM114  | BMP7      |
| TF       | RP4-765C7       | COL20A1         | PSPHP1    | GPR110   | MAGEA1   | MTRNR2L1        | SYT13    | IGHG3     |
| REG1A    | ENSG00000100000 | VIPR2           | GPR123    | BSND     | AC079466 | TTR             | TMEM132  | GABBR2    |
| MSLN     | ENSG00000100000 | C5orf38         | PCP4      | KCNJ1    | COX7B2   | DPCR1           | PSPHP1   | IGHG4     |
| CTSE     | UTY             | KLRC2           | BMP7      | ATP6V0D2 | THRSP    | CRP             | UCN3     | ASB5      |
| HRG      | CYP2W1          | ENSG00000100000 | PTPN20A   | REN      | AC073236 | EIF1AY          | PCDH11X  | PRKY      |
| KNG1     | LEFTY1          | MOBP            | KCNJ3     | CLCNKB   | SLC22A31 | CLDN18          | TMEM132  | IGHG2     |
| CPN2     | IGHA1           | AC104135        | CDH19     | LBP      | SLC6A11  | SERPINI2        | SFRP5    | WIF1      |
| MUC6     | KRT23           | HMX1            | ADCYAP1   | SLC22A12 | SLCO1B3  | UTY             | STAR     | IGHM      |

|           |           |           |            |          |           |           |           |            |
|-----------|-----------|-----------|------------|----------|-----------|-----------|-----------|------------|
| RBP4      | J01415.11 | SLC17A7   | STXBP5L    | NLGN4Y   | EPCAM     | MUC17     | RP11-672L | COL4A6     |
| ORM1      | L1TD1     | CA10      | MUCL1      | PAH      | MAGEC2    | RP11-331F | AC018730  | HSPB3      |
| CXCL5     | DUOXA2    | TTY14     | CA10       | UGT3A1   | SAA1      | MUC5AC    | PPP1R1B   | CASQ2      |
| BHMT      | CLDN18    | HOXD13    | ZFY        | C5orf46  | SAA2      | AQP8      | FSTL5     | NEFM       |
| UCA1      | DUOX2     | HOXB13    | SALL1      | SORCS3   | TXLNG2P   | CLCA1     | SERPINA5  | CRABP1     |
| NLGN4Y    | J01415.10 | TAC1      | NRK        | AQP6     | AFP       | CRISP3    | CYP11A1   | MAPK4      |
| PPP1R1B   | IGJ       | GABRA1    | AZGP1      | CA9      | PSPHP1    | CEACAM5   | SLC4A10   | HOXC12     |
| SLCO1B1   | RP11-462G | HP        | PKP3       | RBP4     | PRAME     | CR2       | SLC6A15   | CNN1       |
| SLC25A47  | LY6G6D    | PRKY      | STXBP6     | C10orf99 | IGHG1     | KRT6A     | OLFM3     | RP11-48O2  |
| FABP1     | CA4       | SIX6      | DHRS2      | PROM1    | CHRNA4    | MUC2      | CRABP1    | PPAPDC1A   |
| ZFY       | GNG4      | IGJ       | PSG4       | HABP2    | NTS       | IAPP      | RP11-473A | KIF1A      |
| CYP2A6    | KRT8P36   | RP11-89N1 | GRIK5      | SLC34A2  | CYP1A1    | OLFM4     | GABRA1    | IGLC3      |
| ACSM2A    | DES       | IGKV1-5   | LRFN5      | HMGCS2   | C5orf27   | RBPJL     | SMOC1     | FOXF1-AS1  |
| AFM       | FABP1     | IGLV3-21  | PIP        | C8orf22  | HGFAC     | ZFY       | STRA6     | ENSG00000  |
| CYP3A4    | TCN1      | IGKV3-20  | CDH12      | SLC22A8  | S100P     | APCS      | TAC1      | HMGA2      |
| PAEP      | HMGCS2    | CXCL13    | CYP1A1     | SLPI     | MUC13     | KRT20     | EYA1      | C8orf22    |
| CCL19     | SFRP2     | GRIN1     | RP11-84911 | SLC5A8   | CTNND2    | PRKY      | CSMD3     | KCNH2      |
| PRKY      | ZFY       | CYP4F24P  | FOX12      | MUC15    | CTD-2195M | PSPHP1    | COL20A1   | TMEM132C   |
| PADI3     | MEGT1     | CRABP1    | CYP1A2     | NDNF     | USH1C     | PSCA      | CALCA     | IGKV4-1    |
| IGKV4-1   | CEACAM7   | IGHG3     | C10orf71   | SST      | AGR2      | ADIPOQ    | EPHA5     | CADM3      |
| F2        | IGHG4     | GABRG2    | NLRP2      | SLC12A3  | SLC22A12  | SLC30A8   | SULT2A1   | MFAP5      |
| SLC2A2    | ENSG00000 | HOXC10    | SLC4A1     | PIGR     | COL2A1    | MUC6      | MGST1     | ACTA1      |
| GP2       | USP9Y     | DKK1      | SLC22A2    | PSPHP1   | MTRNR2L1  | LY6D      | KLK3      | COL2A1     |
| CEACAM5   | MUC6      | IL8       | NMRK2      | NPHS2    | UGT3A1    | TFF1      | MC2R      | IGKV3-11   |
| IGHG1     | B3GNT6    | TRDC      | CLIC6      | IGFBP1   | XPNPEP2   | MUC16     | NPFFR2    | C7         |
| AQP5      | MTND4P12  | HOXC13    | GSTM1      | HP       | RHBG      | KRT5      | GABRG3    | IGLV3-21   |
| UGT1A10   | CLDN2     | MARCO     | TFAP2C     | DMRT2    | HEPACAM   | G6PC2     | KCNIP1    | PLN        |
| TFF2      | IGHG1     | CXCL6     | SMOC1      | TMPRSS2  | SDS       | NLGN4Y    | PIRT      | IGLC2      |
| UPK1B     | CA1       | MOG       | TTR        | PLA2G4F  | TRIM71    | TFF2      | TAC3      | DKK1       |
| CDC20B    | RP11-474D | CHGA      | MOG        | SIM1     | CYP8B1    | CUZD1     | CLVS2     | MEG3       |
| GSTA2     | HULC      | DCX       | RP11-115D  | ALPI     | LGR5      | PADI1     | CNGB1     | SLC7A3     |
| ECEL1     | DPEP1     | APCDD1L   | KNG1       | NPTX2    | CHI3L1    | ITLN1     | TMEM196   | TCF21      |
| CYP8B1    | IGKV4-1   | IRX2      | PDZRN4     | STAC2    | CYP7A1    | PDIA2     | GRIK1     | PSPHP1     |
| FGB       | NXPE4     | DLK1      | FRMD7      | DUSP9    | ADH4      | SPINK4    | OPRM1     | IGKV3-20   |
| ALDOB     | NPSR1     | MAG       | ENSG00000  | AC010127 | PRSS8     | CTD-2377D | GLP1R     | RP11-471J1 |
| CRP       | PCSK1     | LUZP2     | ANO4       | HEPACAM2 | PTH2R     | TM4SF20   | GHRH      | VIT        |
| DKK1      | IGLV3-21  | PDYN      | DUSP9      | PNCK     | IGF2BP1   | IGHG4     | C1QL2     | GS1-600G8  |
| ADH1A     | CXCL5     | GJB6      | LRAT       | KRT223P  | SLC6A2    | SPRR3     | SH3GL3    | PAX3       |
| HAO1      | MS4A12    | F13A1     | NLGN4Y     | SLC13A1  | TM4SF20   | DMBT1     | DIRAS3    | RPE65      |
| C1orf186  | CDHR1     | SMOC1     | SIX6       | CLCNKA   | UGT2B17   | KLK7      | NPY2R     | OGN        |
| CFHR1     | PSPHP1    | TMSB15A   | ENSG00000  | SLC17A3  | KRT19     | APOA4     | TFAP2C    | LUM        |
| RP11-799O | IGHM      | PITX2     | PTGFR      | CASR     | GCGR      | SI        | PPP1R17   | CXCL14     |
| FGF19     | PRKY      | RP11-231C | HMGCS2     | KLK1     | UTY       | RP11-462G | RPH3A     | TTY15      |
| SAA2      | B4GALNT2  | TBX5-AS1  | MTRNR2L1   | GSTM1    | BPIFB2    | ENSG00000 | AADAC     | SALL1      |
| CA9       | CKMT2     | C1orf158  | ENSG00000  | SLC5A12  | CTAG2     | BPIFB1    | IGHG1     | IGHA1      |
| SLC22A7   | IGHV4-39  | POU4F1    | PLCXD3     | CHRD1    | RELN      | KLK1      | GDF10     | LONRF2     |
| RP11-554I | IFAM3B    | IGLC3     | RP13-436F  | PVALB    | NOTUM     | TTY15     | GDA       | UNC5D      |

|           |           |           |           |            |           |           |           |            |
|-----------|-----------|-----------|-----------|------------|-----------|-----------|-----------|------------|
| CYP1A2    | TFF1      | IGLC2     | TPTEP1    | FGF9       | FXVD2     | PLA2G2A   | RELN      | KRT14      |
| IGLV2-14  | PPBP      | PCSK2     | CDH7      | GRIA4      | SPP1      | KCNK16    | PRKY      | HOXB13     |
| ASGR2     | ACSL6     | MMP13     | LINC00284 | GC         | SLC22A11  | NPSR1     | LRRTM4    | LMOD1      |
| UGT2B4    | EREG      | IGLV2-14  | SLC6A15   | GGT6       | PRSS3     | PCSK2     | PAX5      | C20orf166- |
| SLC13A5   | AQP8      | GLRA3     | TRHDE-AS1 | CD70       | ISX       | KLK6      | FNDC9     | ABCB5      |
| HPX       | VSIG2     | MMP7      | GLDN      | SLC9A4     | SAA2-SAA4 | GSTM1     | TFPI2     | SLC6A15    |
| ST8SIA3   | IRX2      | WBSCR17   | FREM2     | UGT1A9     | MAGEA12   | CXCL5     | POF1B     | PRG4       |
| SLC44A4   | IGHV5-51  | CPLX2     | ENSG00000 | CPN2       | AP1M2     | DLK1      | HPGD      | CHL1       |
| CR2       | C10orf99  | WIF1      | GDA       | PRKY       | MT1G      | ONECUT3   | CDH10     | IGLV2-23   |
| TMPRSS4   | IGKV1-5   | IGLV2-23  | MAOB      | MYEOV      | ZIC1      | UPK1B     | LHX9      | CHI3L1     |
| CDH16     | IGHG3     | CXCL5     | FAM70A    | PRIMA1     | HPGD      | RP6-149D1 | EYA4      | IGKV1-5    |
| S100P     | ZIC2      | DSG2      | PALM3     | ESRP1      | RP11-539E | SPRR1B    | CDH12     | HAS1       |
| SAA1      | IGLV1-40  | CCK       | CFTR      | SERPINA5   | GCK       | RP11-680B | NKX6-1    | DCN        |
| TTR       | IGLV3-19  | KLK6      | KCTD8     | SAA2       | FAM3B     | CGB5      | IGSF10    | CA3        |
| VTCN1     | MAP7D2    | SLN       | CYSLTR2   | SLC6A18    | ENSG00000 | MS4A1     | HAND1     | IGLV3-19   |
| ENSG00000 | LYPD8     | CNDP1     | WNT2      | CTB-27N1   | GLYAT     | MYBPC1    | PON1      | IBSP       |
| IGKV3-11  | IGHG2     | HOXB8     | CTB-27N1  | EPO        | SLC25A47  | B3GNT6    | HSPB7     | MARCO      |
| UGT1A8    | CHGA      | NEFM      | STAP1     | CYP4A22    | MAGEC1    | GC        | RBBP8NL   | WBSCR17    |
| SUCNR1    | CHP2      | IGLV1-40  | HEPACAM2  | RP11-1C1   | NPC1L1    | CHGA      | RP11-424G | IGLL5      |
| MAT1A     | IGLV2-23  | IGFN1     | DPP10     | TTY15      | GSTA2     | SST       | TUBB4A    | SFRP4      |
| SPINK1    | CA9       | IGHA2     | IGHG1     | SLC34A1    | UGT1A4    | CHGB      | IGKC      | IGFN1      |
| SLC5A8    | IGLV2-11  | PCDH15    | ADAM2     | NELL1      | CTNNA2    | SERPINB3  | CDH19     | RP11-37111 |
| ALDH3B2   | IGLV2-14  | CHRNA1    | RIMS2     | ATP6V1B1   | GPR88     | A2ML1     | FRMPD4    | LMO3       |
| IGKC      | SPP1      | KCNE1L    | VWC2      | C12orf36   | HPD       | ALB       | SCRT2     | IGLV1-40   |
| PSPHP1    | CALB1     | HOTAIR    | GPRC6A    | ATP6V1G3   | PDZK1IP1  | LEFTY1    | GCGR      | PCDH10     |
| ENSG00000 | IGHV1-18  | BMP5      | FOXP2     | RP11-37111 | TINAG     | KLK8      | KCNT1     | JPH2       |
| RP11-1C1  | IGKC      | IGHM      | PAK7      | MT1G       | DHRS2     | IGHD      | AC138430  | CCL21      |
| KRT17     | IGKV3-11  | INA       | IYD       | TMEM174    | ASPG      | GABRP     | APCDD1L   | ATRDN      |
| NTS       | RNU4-2    | RP11-219E | GALNTL6   | MYH8       | IGKC      | FGA       | RP11-60L3 | IGHGP      |
| HPD       | KLK6      | SLC14A1   | GYG2P1    | RAB25      | ODAM      | CEACAM7   | MME       | CBLN1      |
| HOXB13    | IGLV3-25  | COL6A3    | FGF14     | CLDN19     | DKK1      | FDCSP     | GLRA3     | LMO1       |
| SLC10A1   | AC016735  | STMN2     | WSCD2     | CYP24A1    | RP11-697M | FER1L6    | IGHG3     | ASB2       |
| SERPIND1  | FOXJ1     | ST8SIA3   | RP4-765C7 | SFRP2      | UROCI     | FGG       | SP5       | SMOC1      |
| GSTM1     | ENSG00000 | FREM3     | FOXI1     | PCK1       | SLC22A1   | FABP1     | MTND4P12  | WT1        |
| HPR       | IGLL5     | ENSG00000 | TRGC1     | CCL21      | HAMP      | HOXA13    | GPC5      | CNTN1      |
| MBL2      | DSC3      | DLX5      | TTY15     | LPPR5      | GNG4      | CPLX2     | GPR98     | RBM24      |
| SSTR5-AS1 | IGHV3-23  | HOXB4     | RP11-527H | CAPN6      | SLC10A1   | HMGCS2    | KRT9      | RP11-887P  |
| IGLV3-21  | PRHOXNB   | SFRP2     | RNF212    | RP11-690G  | CXCL6     | EPYC      | KCNJ6     | TENM3      |
| MUC5AC    | MSLN      | CHI3L1    | MTND4P12  | ADCY8      | DEFB1     | DES       | NPBWR2    | TNNT3      |
| PLEKHS1   | SI        | SLC18A3   | PRKY      | FTCD       | UPK3A     | AC016735  | TRPC5     | MTRNR2L1   |
| IGHV3-23  | COL10A1   | RP11-178A | CHGB      | KRT19      | CPS1      | CTSE      | SLITRK1   | IGF2       |
| KLK10     | FIBCD1    | HOXC11    | TRHDE     | TEX15      | PDX1      | KRT16     | PPAPDC1A  | WNT2       |
| CXCL13    | ALDH1L1   | COL11A1   | KCNJ16    | SPTBN2     | TRIM55    | S100P     | IRX4      | TMEM179    |
| PRSS21    | IGLV4-69  | EYA4      | THRSP     | HRG        | PTGDS     | DSG3      | TTY14     | IGHV1-18   |
| LECT2     | HEPACAM2  | ARMC3     | CPXM2     | KISS1R     | LCN2      | TCL1A     | NELL1     | CTC-296K1  |
| ANGPTL3   | COMP      | NR0B1     | CLNK      | SLC17A4    | RP11-456A | LYPD2     | FGF10     | IGLV3-25   |
| SERPINA11 | MAGEA3    | RP11-300N | RSPO3     | PRAME      | B4GALNT2  | VSIG1     | COX4I2    | IGLV2-14   |

|           |           |           |           |           |            |          |           |            |
|-----------|-----------|-----------|-----------|-----------|------------|----------|-----------|------------|
| ORM2      | MTND1P23  | CACNG3    | TBATA     | G6PC      | SSTR5-AS1  | SIM1     | JPH3      | PRL        |
| FGG       | SLC39A2   | NSG2      | TMPRSS11  | IGHG1     | SFRP5      | CELP     | SOHLH1    | TCF23      |
| GGT6      | IGHV3-15  | SCRT2     | MME       | C7        | TAT        | PSAPL1   | AC013402  | NRK        |
| LPA       | IGLV6-57  | CSF3      | CTB-92J24 | BIRC7     | IGHG4      | GAD2     | PMP2      | RIMS2      |
| ARG1      | MUC12     | GSX1      | UNC80     | IL20RB    | RP11-101E  | MIR205HG | ENSG00000 | (WNT7B     |
| ADH1C     | IGHV4-59  | ST8SIA2   | RP11-161M | RHBG      | KNDC1      | SFRP5    | CPB1      | TENM2      |
| RTL1      | IGLV3-10  | TENM3     | KCNJ1     | CALB1     | MMP7       | FAM83A   | PTPRZ1    | VGLL2      |
| SFRP2     | NPTX2     | IGLL5     | L1CAM     | SLC26A7   | C19orf21   | CASP14   | GSTM1     | XPNPEP2    |
| PRAP1     | IGLC2     | VSTM2A    | PTPRD     | FAM83F    | CYP17A1    | MUC5B    | NRK       | IGHV4-39   |
| IGHV4-39  | IGLC3     | PCDHGB7   | SLC3A1    | MCHR1     | DUOX2      | MSLN     | ABP1      | IGHV3-23   |
| CST1      | IGKV3-20  | IL2RA     | CASR      | ABP1      | ZFY        | KRT13    | KCNJ3     | GRIK5      |
| TTY15     | ADH1C     | IBSP      | RP11-19E1 | MAL       | HSD11B1    | ABCC8    | NXPH4     | PRIMA1     |
| ENSG00000 | (ABHD12B  | 14-Sep    | LRRTM1    | MTND4P12  | SLC13A3    | FGL1     | JAKMIP1   | CTC-296K1  |
| IGHG2     | DSG3      | MBP       | FLJ00388  | GSTA2     | KRT7       | PRSS3P1  | FAM19A4   | OSTN       |
| NLRP2     | HMGB1P5   | TLX1      | KRT7      | SFRP1     | RP6-170F5  | BTNL3    | CACNG3    | PRPH       |
| MUC16     | IGLV8-61  | SP8       | TTY14     | OSTM1-AS  | GREM2      | CRYBA2   | RFX6      | HAND2      |
| UGT2B10   | ENPP3     | KCNC2     | TRPC3     | SLC5A1    | CA9        | PTF1A    | MLPH      | NKX2-5     |
| IGHA1     | SLITRK6   | PCDH11X   | MUC15     | TFCP2L1   | C19orf77   | AMBP     | SIK1      | PROM1      |
| KRT81     | IGKV1-9   | MYT1L     | RASSF6    | CP        | FAM133A    | MSMB     | CCL21     | DPYSL5     |
| TAT       | IGHV1-46  | VSNL1     | KLK1      | SCGN      | FGFR2      | GJD2     | FAM5C     | WISP2      |
| GABRP     | IGHV1-2   | NKX6-2    | BCAN      | SLC10A2   | MEP1A      | MTND4P12 | IGLON5    | IGLV1-44   |
| SPP2      | NLRP2     | LPPR1     | F11       | MT1H      | CTA-85E5.1 | COL17A1  | IGHG2     | DPP6       |
| IGKV3-20  | ENSG00000 | (HLA-DQA2 | KNDC1     | PTHLH     | CSAG1      | COL11A1  | RPRM      | GSTM1      |
| ARHGAP40  | RETNLB    | GATA4     | LHFPL4    | ENSG00000 | (HRG       | DUOXA2   | SHD       | DPT        |
| MS4A1     | PI3       | PAX3      | ATP6V1G3  | LINC00645 | IGHG3      | SCGN     | MUC15     | LEFTY2     |
| TFF1      | KLK10     | HOXA4     | CCKAR     | BMPR1B    | NEU4       | HOXC10   | PTPN20A   | PART1      |
| TRIM50    | CST1      | RP11-197K | ATP2B2    | GCGR      | CYP2B7P1   | SYT8     | PCP4      | GFRA1      |
| PCSK1N    | UGT2A3    | HAND2     | LINC00543 | APOB      | IGHG2      | ANXA10   | C9orf135  | WFDC2      |
| ENSG00000 | (MTRNR2L1 | HMGA2     | REN       | NR0B2     | FAM99A     | PIGR     | MT3       | PAGE5      |
| GLYAT     | SMOC1     | GALNT13   | KIAA1644  | RP11-477N | SLC34A2    | CXCL13   | RASAL1    | PTCHD1     |
| UGT1A9    | CAPN6     | RPH3A     | DGKI      | MT3       | ESRP1      | TRIM29   | CNGA3     | GATA5      |
| CTD-2015G | TFF2      | FAM163B   | C11orf53  | TFAP2B    | HAO2       | UGT2A3   | RP11-700H | PDPN       |
| IGLV1-40  | MAGEA6    | IGHV3-23  | KRT19     | RP11-397G | H19        | CFC1     | UGT3A2    | PLP1       |
| KLK6      | SLC13A2   | LHFPL3    | COX6CP1   | MSLN      | ADH1C      | TMED11P  | ODAM      | MAGEL2     |
| DPYS      | SFRP4     | IGLV2-11  | FBN3      | GRHL2     | AKR1B15    | SCGB3A1  | PENK      | IRX1       |
| PPP2R2C   | WIF1      | MYT1      | ADTRP     | SLC13A3   | SLPI       | KCNJ16   | GAD1      | RP11-615I2 |
| HOXA13    | IGLV1-51  | GABRA5    | WBSCR17   | EGF       | LECT2      | C6orf15  | COMP      | HAPLN1     |
| ACSM2B    | CPS1      | CTD-2339F | SDK2      | CTXN3     | KCNU1      | CFTR     | CRTAC1    | DSC3       |
| REG1B     | MMP7      | ATCAY     | NPY6R     | CNTN1     | IGKV3-20   | DUOX2    | APCDD1L   | LHX8       |
| MTND4P12  | TRIM72    | DLX6      | COLEC12   | EHF       | IGKV4-1    | SLC9A4   | FAM19A3   | HMCN2      |
| VGLL1     | LRRC26    | ZNF488    | BPIFA2    | NAT8      | CLRN3      | CLPSL1   | GPR139    | IGJ        |
| SLC6A11   | ELF5      | EGFR      | ENSG00000 | (C1QL1    | PAEP       | SPRR1A   | EDN3      | FGF5       |
| LINC00494 | PLA2G12B  | TRH       | PSG5      | PAPPA2    | CDHR2      | NEUROD1  | TMEFF2    | ENSG00000  |
| AGXT2     | ENSG00000 | (IGLV3-19 | FAM135B   | DCN       | WNK2       | LCN2     | KCNK2     | TNNT1      |
| IGHM      | ZIC5      | AC017048  | ERP27     | ENSG00000 | (DMKN      | CEACAM6  | CYP26A1   | EEF1A2     |
| IGHG4     | KRT6B     | RP4-765C7 | SLC4A9    | DNER      | RP11-414K  | TNS4     | ADH1B     | RPRM       |
| IGHG3     | RP11-438N | IGHV1-18  | RPSAP53   | LGALS4    | USP9Y      | AQP5     | TEX26     | PGR        |

|           |            |            |            |            |            |            |            |            |
|-----------|------------|------------|------------|------------|------------|------------|------------|------------|
| KCNJ13    | IGLV1-47   | IGFBPL1    | SLC24A2    | GSTA1      | FGF19      | FGF19      | DPP10      | ADH1C      |
| IGLV2-23  | IGHGP      | LGR6       | UGT1A6     | WBSCR17    | CLDN4      | TTY14      | SLC18A3    | COL10A1    |
| IGHV1-46  | ENSG000001 | IGKV3-15   | CTD-2335A  | SLC13A2    | PITX1      | RP11-697M  | RNA45S5    | CRTAC1     |
| IGLV3-10  | H19        | SYNPR      | LPPR1      | EGFR-AS1   | TMEM92     | UGT1A10    | SIX3       | IGHV5-51   |
| LBP       | XPNPEP2    | GALR1      | SLC26A4    | CSDC2      | SPP2       | KRT14      | KLK4       | PLIN4      |
| SLC6A14   | BMP7       | CHST8      | SLC26A4-A  | UPK1B      | LIN28B     | KLK10      | IGLV2-23   | EDN3       |
| CES1      | RP4-706A1  | SV2B       | RIMS1      | ADH1B      | FGF21      | ALPP       | CGA        | IGFBPL1    |
| CALCA     | ATOH1      | TMEM125    | C7         | IGHG4      | SYT13      | KLK3       | LRRC38     | SBSPON     |
| SFRP5     | IGHV3-33   | CA3        | IGHG2      | AP000439.  | F9         | AC104135.  | ISL2       | NPTX2      |
| CYP4A11   | PIWIL1     | AC005550.  | ATP13A5    | RP1-163G9  | CSMD1      | RP4-765C7  | SCGN       | CSDC2      |
| CEACAM6   | IGHV3-74   | CRYM       | TBX15      | TSPAN8     | CST1       | KRT17      | IGHG4      | B4GALNT4   |
| PRODH2    | B4GALNT4   | IGHV4-39   | SLC6A17    | CXCL5      | HAL        | PHGR1      | FAM166B    | SFRP2      |
| SAA4      | ONECUT3    | GAD2       | RP11-690G  | ZMAT4      | IGKV3-11   | SLC13A5    | SLC1A6     | MMP3       |
| TM4SF4    | TACSTD2    | AC108142.  | GJD2       | LPPR1      | MAGEB2     | SULT1C2    | GIP        | MAOB       |
| SERPINB5  | AC016683.  | NEUROD1    | DMRT2      | KCNJ10     | GP2        | IGLV8-61   | LINC00648  | SFRP1      |
| AMBP      | SLC28A2    | DLL3       | RP11-12712 | SCNN1B     | SEZ6L2     | TCN1       | NMUR2      | MME        |
| SLC38A4   | MMP1       | CTD-2081K  | SFTPB      | XPNPEP2    | PPP2R2C    | CST1       | GRM7       | GJB2       |
| IGKV1-5   | IGLV1-44   | RP11-189B  | LTK        | ASPG       | DKK4       | PAH        | DGCR5      | SERTM1     |
| THRSP     | IGHV3-11   | MAB21L2    | WFDC2      | IGLON5     | IGLV3-19   | NLRP2      | NPAS4      | SCRG1      |
| PCK1      | ENSG000001 | KCNV1      | TESPA1     | IGKC       | NQO1       | SLC3A1     | CXCL14     | NIPAL4     |
| PAX2      | GUCA2A     | TFAP2B     | CEL        | ENPP3      | IGLC3      | UGT2B15    | NEUROG2    | EMILIN3    |
| FGL1      | IGLV3-1    | SCNN1B     | SLC26A9    | F2         | ENSG000001 | IGLV10-54  | MAL2       | FIGF       |
| CD79A     | WDR72      | CHODL      | DBC1       | HPD        | GPC3       | TMPRSS15   | KISS1R     | SOX2       |
| APOB      | MTTP       | LBP        | ATP6V1C2   | EPS8L3     | RP11-115C  | SCG3       | OR2L13     | SCUBE1     |
| AKR1D1    | KLK7       | PAK7       | FOXD1      | GABRA2     | NPTX2      | NKX2-2     | ERBB3      | ENSG000001 |
| IGF2BP1   | IGKV3-15   | PCDHA4     | CDH22      | NPHS1      | CFHR5      | HOXB13     | CELF5      | GREM2      |
| MAB21L2   | IGHV3-21   | FEZF1      | ALDH1A3    | LINC00462  | MUC6       | PRAP1      | IGHA2      | SSX1       |
| SERPINA7  | HS6ST2     | PCDHB5     | CTA-929C8  | MIOX       | CFTR       | SLC6A14    | VIP        | ASTN1      |
| ADH1B     | IGF2BP3    | FBN2       | GABRB3     | CWH43      | RP11-293B  | DHRS9      | PDYN       | SGCA       |
| AC092165. | CXCL14     | IGHG4      | BNC1       | CREB3L3    | IGKV1-5    | FGB        | IGHA1      | CDH3       |
| IGHV3-15  | FREM2      | JPH3       | LUM        | PROM2      | BCL2L10    | ENSG000001 | CYP11B2    | CACNG4     |
| ONECUT3   | SLC9A3     | RNU4-2     | CGA        | LINC00671  | CNTFR      | CCL19      | TLX1       | C3         |
| HOXA10    | LCN2       | AC016683.  | ALDH1A2    | IGHG3      | SUSD4      | AKR1B10    | DMP1       | IGLV3-1    |
| EPHA7     | MMP3       | EYA1       | UMOD       | SLC9A2     | IP6K3      | SLC26A9    | IGKV1-5    | NTF3       |
| TSPAN8    | CD177      | RP11-438E  | COX7A1     | NRK        | C6orf223   | IGHV1-18   | IGKV3-20   | BMP5       |
| GRHL2     | MUC4       | SFRP1      | IGHG3      | CYP2J2     | LUM        | SIK1       | HAPLN1     | MMP1       |
| OTC       | IGHV1-24   | TMEM132C   | DIO2-AS1   | B4GALNT2   | RP11-81H3  | HOXC11     | CHL1       | COL4A5     |
| SPP1      | RP11-742N  | ENSG000001 | RNF128     | IGLV3-21   | GTSF1      | AMY2B      | AC104135.  | CTSG       |
| CYP2B6    | ENSG000001 | PCDHGA9    | RP11-420K  | L1CAM      | GABRB3     | KLK5       | HPSE2      | CTD-2195N  |
| CFHR5     | IGHV3-49   | HOXC-AS5   | CHD5       | RP4-765C7  | SMEK3P     | NMUR2      | RP13-49I15 | LPHN3      |
| CPS1      | ALDOB      | IGKV3-11   | RP11-520P  | SPON1      | TRIM50     | FEZF1-AS1  | PRKG2      | EPHA7      |
| APOF      | TNNC2      | MAL2       | TNS4       | DCAF12L1   | IGLV3-21   | ST8SIA3    | SLITRK5    | HOXC13     |
| CFTR      | GRM8       | HOXD10     | FXYD3      | DES        | ENSG000001 | IGHV1-2    | NCAN       | KCNMB1     |
| TTY14     | PRAP1      | CTD-2554C  | ZNF676     | IGHG2      | IGLV1-40   | TFF3       | GABRG2     | WT1-AS     |
| AADAC     | KRT6A      | SEMA3E     | DAPL1      | IGHV4-39   | PCK1       | S100A2     | AOX1       | PTPRT      |
| PI3       | WFDC2      | NOS2       | ATP2C2     | ENSG000001 | MT1H       | CLDN2      | HOXA9      | FGF10      |
| TTYH1     | UCA1       | SYT13      | DPP4       | SH3GL2     | ENSG000001 | GPR87      | SHOX2      | ENSG000001 |

|                 |            |                 |                 |                 |            |                 |           |           |
|-----------------|------------|-----------------|-----------------|-----------------|------------|-----------------|-----------|-----------|
| C8A             | SLC13A3    | VGf             | DNER            | ACE2            | TUBB4A     | C6              | ATP2B2    | MAGEA3    |
| HSD17B6         | AQP5       | HOXB3           | GLDC            | PCSK1N          | C7         | IGHV1-69        | UGT8      | FOXG1     |
| ENSG00000101100 | SLC17A6    | DRD2            | SLC36A2         | MOGAT2          | WNT7A      | FEV             | CHRM2     |           |
| DNER            | IGLV7-46   | BCAS1           | FABP6           | DPEP1           | TTC36      | LINC00443       | KRT80     | RIMS4     |
| IGLL5           | GJB5       | HOXA9           | CNTNAP5         | IGLC3           | IGLV2-23   | GSTA2           | LLOXNC01  | IGLV2-11  |
| IGHA2           | IGHV4-34   | IGLV3-25        | IGFBP1          | IGLV3-19        | AC098973   | NTSR1           | NOS1      | SBSN      |
| WIF1            | NKD1       | VSTM2B          | RP11-711K       | ENSG00000101100 | FADS6      | LINC00643       | ASB4      | STXBP5L   |
| GJB4            | KLK11      | CA9             | KCNIP1          | NDUFA4L2        | MFSD2A     | ERN2            | NDST3     | LRRN1     |
| CYP2E1          | MPV17L     | LINC00599       | RP11-85G2       | TUBA3D          | PPAP2C     | SOX21           | FABP6     | TPSB2     |
| TRIM29          | LYZ        | PNOC            | AC007879        | ENSG00000101100 | AVPR1A     | APOC3           | EPHA8     | BPIFB4    |
| HFE2            | TTY15      | HOXA13          | MUC20           | PCP4            | IGLC2      | DUSP27          | SLITRK6   | GPR133    |
| ENSG00000101100 | NXPH4      | SLC32A1         | PRSS12          | PRAP1           | SERPINA7   | CA9             | SV2C      | GPR158    |
| FTCD            | FZD10      | CPNE6           | ENSG00000101100 | LIX1            | CNDP1      | GKN1            | IGLC2     | FAM19A5   |
| AP000688        | NXPE1      | SOX1            | AC066593        | IGHV1-24        | HOXA13     | APOA2           | MTND1P23  | ZNF536    |
| IGLV3-25        | IGKV1-17   | C7orf57         | MMP7            | FABP1           | BEX1       | SLC30A2         | GFRA3     | IGLV6-57  |
| SLC26A9         | GP2        | LINC00643       | HS6ST3          | CLIC6           | CCL25      | IGFL1           | KCNJ5     | ADAMTS19  |
| C12orf36        | SLC6A14    | GJB1            | SLC6A2          | RP11-7060       | CXCL5      | CTD-2147F       | RP4-765C7 | PTGDS     |
| LHFPL4          | RP4-604A2  | MAGEE2          | SORCS2          | SAA2-SAA4       | BEX2       | CXCL17          | AC016683  | ITGA8     |
| RP11-697M       | IGLV10-54  | HOXB-AS5        | CDH16           | CLDN16          | STMN2      | KRT6B           | IGLV3-21  | IGLV1-47  |
| TRHDE-AS1       | CKB        | SCGN            | TDGF1           | TNFAIP6         | DUOXA2     | HOTTIP          | OPCML     | PDZRN4    |
| POU3F3          | IGKV1-16   | GABRB3          | RORB            | RP11-627G       | SCUBE1     | CLDN10          | MYH14     | PI15      |
| IGLV3-1         | IGHV4-31   | ELFN2           | SLC26A7         | HHLA2           | CCL21      | MMP7            | EGR4      | CPXM1     |
| CFHR3           | AC104135   | SLPI            | DIRAS2          | IGHM            | NKD1       | SYT4            | RASSF6    | HHIP      |
| APOH            | SLC44A5    | ENSG00000101100 | IGHG4           | TOX3            | UGT1A9     | IGLV3-10        | NGEF      | IGHA2     |
| DMBT1           | CACNG4     | HOXB2           | LMO3            | HAO2            | C8orf47    | PRSS21          | IGKV3-11  | LBP       |
| CHGA            | WNT11      | SLC44A5         | PAX2            | SOSTDC1         | PCSK1N     | LTF             | MYLK3     | PCSK1N    |
| CACNG4          | CHST4      | IL13RA2         | ASB5            | SLC44A5         | FREM2      | MIR7-3HG        | IGLC3     | TNNI1     |
| EREG            | SPDEF      | ACTL6B          | CNGB1           | VIL1            | IGLL5      | AC005550        | IGLV2-14  | PENK      |
| UGT2B7          | CES1       | NPPA            | BMPR1B          | ENSG00000101100 | FNDC5      | BTNL8           | RP11-420K | FRMD6-AS1 |
| AC104135        | PCSK1N     | SYT4            | ADH1C           | HS6ST2          | PIGR       | TUSC5           | SERTM1    | SCN2B     |
| APCDD1L         | IGHV1-69   | RP11-676J1      | RAB3C           | ELF5            | RP11-734J1 | ENSG00000101100 | TLX3      | CA9       |
| DARC            | SAA1       | NPY2R           | KCNH2           | COL23A1         | WFDC2      | C12orf36        | KIAA1644  | TBX5      |
| ENSG00000101100 | CYP2B6     | PACSIN1         | TPRG1           | MCCD1           | CACNG4     | ALPPL2          | DCHS2     | SORCS3    |
| TCN1            | RP11-343H  | SNAP91          | RP11-379F       | IGHA2           | IGHV1-18   | FFAR1           | PROK2     | GDNF      |
| MYEOV           | TMSB4Y     | CDKN2B          | KRTAP5-8        | LUM             | RP11-774D  | IGHG1           | SLC5A7    | TPSAB1    |
| SLC5A1          | TM4SF20    | GRID2           | C6              | IGKV3-20        | SULT4A1    | MMP1            | EGLN3     | SMYD1     |
| FREM2           | CELP       | KRT5            | EN1             | IGHA1           | IGLV1-44   | IGHM            | LHCGR     | CHRD1     |
| IGLC2           | RP11-115D  | RP11-745C       | PTN             | IGLV2-23        | NLGN4Y     | IGHG3           | PTCHD1    | DACT2     |
| CHST4           | SERPINB5   | FBN3            | LAD1            | CDH4            | SLC1A2     | IGLV3-19        | EPHA7     | IGHV1-24  |
| PKLR            | SNORA73B   | NCMAP           | SYT14           | TDGF1           | IGHGP      | WDR72           | IGHM      | BCHE      |
| COL17A1         | IGF2BP1    | EFCAB1          | SIX1            | WT1             | IGHV4-59   | SERPINA6        | RET       | LGR5      |
| ERN2            | RNU4-1     | UBXN10          | CYP3A4          | ACSM2B          | IGHV3-23   | PRAME           | SALL4     | SERPINB2  |
| RGS4            | GABRP      | CAPSL           | EBF2            | SLC6A20         | SLC22A7    | FCER2           | AC002480  | SLITRK3   |
| CTD-2297D       | DIL8       | FEZF1-AS1       | SFRP2           | UNC5D           | ACSM1      | IGLV3-21        | PLP1      | SPON1     |
| SLC13A2         | GATA4      | PRDM13          | PRSS1           | IGKV3-11        | LGALS4     | KRT4            | RP11-247C | IGKV3-15  |
| ENSG00000101100 | ACE2       | RASSF10         | SHISA2          | IGLL5           | TENM2      | GPHA2           | CLCNKA    | ACAN      |
| SULT1C4         | RP11-431J1 | ALDH1A3         | CTD-2566J1      | MAT1A           | CD5L       | IGHV5-51        | IGLV1-40  | IGHV3-15  |

|           |           |           |           |           |           |           |           |           |
|-----------|-----------|-----------|-----------|-----------|-----------|-----------|-----------|-----------|
| C3P1      | SDR16C5   | CAPN6     | ADH6      | RP11-438N | CNTNAP4   | CRH       | MCF2      | SLPI      |
| CREB3L3   | CA8       | SEC61G    | PCK1      | KCNS1     | DACT2     | RP11-320N | H19       | LUZP2     |
| PRSS3     | FEZF1-AS1 | FAM81B    | TNFRSF11E | IGLV3-1   | SLC44A5   | ANXA8     | SCUBE1    | SEMA3E    |
| SDR16C5   | CHRD12    | RP11-436F | GJB1      | CXCL6     | RP11-169F | UCA1      | GRIA3     | KRT17     |
| IGJ       | ADH1B     | TMEFF2    | IRX6      | AKR1B10   | TMC5      | APOH      | MAPK4     | MYO3A     |
| AC147651  | IGKV1-6   | TRIM67    | RP11-11N9 | CDHR1     | FABP1     | DKK1      | CNTFR     | CHRNA1    |
| IGHGP     | FREM1     | SVOP      | AC010423  | TMEM130   | SOAT2     | IGHV4-39  | RARRES2   | ABCA9     |
| ITGB6     | EVX1      | SEMA3D    | RP11-8P11 | IGKV4-1   | CHL1      | IGHA2     | CCBE1     | SORCS1    |
| IGHV3-11  | FOLR1     | CALY      | PCDH7     | PIK3C2G   | PTGFR     | TNNT1     | VSNL1     | ENSG00000 |
| IGLV3-19  | POU6F2    | MEOX2     | HCAR1     | SLC22A2   | ALPI      | PAX5      | ELFN2     | SIM1      |
| F13B      | AC064834  | DMRTA2    | RP3-395M  | CHIT1     | BHMT      | TMEM179   | FAM5B     | RBFOX3    |
| ABCG8     | KLK12     | CPNE4     | S100A14   | ERBB4     | AC104809  | SLCO1B3   | NDUFA4L2  | KCNB2     |
| KRT23     | KRT17     | RIT2      | RP11-326C | CYP4F2    | CA12      | LGALS4    | GSG1L     | MMP9      |
| SNAP91    | IGFBP2    | IGHV5-51  | CTD-2626C | IGLV1-40  | PEG3      | RP11-528G | MLXIPL    | TRHDE     |
| C8B       | SOX2      | SLC17A8   | PKHD1     | SLC22A7   | B3GNT3    | CACNG6    | FOXO3     | MASP1     |
| DSC3      | NTRK2     | RP4-555D2 | CDC20B    | IGKV1-5   | GYS2      | FAM3D     | C4orf6    | DUOX2     |
| TFPI2     | GSTM1     | SHH       | CTD-2314G | SLC22A11  | SLC12A1   | FABP2     | NNAT      | ROBO2     |
| AC073218  | SLC4A4    | UGT8      | ESPN      | RP11-513G | IGHV4-39  | ENSG00000 | LIN28B    | PTPRZ1    |
| FGA       | PRSS33    | COL1A1    | SYT10     | SYT13     | AKR1D1    | SLC17A4   | RIT2      | IGHV4-59  |
| ANKRD1    | PRSS21    | FAM183A   | C6orf223  | MAP7D2    | FCAMR     | PIK3C2G   | TNXA      | PLA2G2D   |
| KRT16     | IGHV3-73  | NETO1     | DCAF12L1  | LTF       | IGLV1-47  | IGKV3-20  | DRD5      | LINC00578 |
| NPY       | MARCO     | HOXA2     | AC104135  | BMP7      | CCL19     | RFX6      | SLC6A5    | ADRA1A    |
| IGLC3     | HAVCR1    | LPPR3     | SHISA3    | ACSM2A    | CXCL13    | CPA6      | ISLR2     | MYLK      |
| UGT1A6    | SLC35D3   | MMP9      | KBTBD12   | RP11-1C1  | FAM19A5   | CELF3     | TMEM45B   | C5orf46   |
| ENSG00000 | NPC1L1    | TSHR      | SPINK5    | SLC9A3    | ZIC4      | SPINK1    | IGKV4-1   | SLC24A3   |
| UPB1      | DHRS9     | HOXA7     | IGKC      | VTCN1     | GFRA1     | IGLV1-44  | MCOLN3    | APCDD1L   |
| CYP4A22   | MALAT1    | CXCL14    | SIK1      | ENSG00000 | EPS8L3    | PI16      | RP6-170F5 | EPHA5     |
| IGLV1-47  | THBS4     | USH1C     | SUCNR1    | SPINK1    | PAGE2     | TMPRSS4   | RP11-1401 | RP11-531A |
| IGHV5-51  | GAL       | MAP3K19   | SEZ6L     | LRP2      | TUBA3C    | IGHV3-11  | C7        | ATP1A2    |
| IGHV1-18  | RP11-297P | MSTN      | TINAG     | IGHGP     | SULT1C2   | IGLV4-60  | ENSG00000 | GRIN2A    |
| ENSG00000 | RP11-11N5 | CARNS1    | CYP4F11   | AC104135  | ACE2      | IGKV1-27  | IL6       | GPC3      |
| RP11-325F | AKR1B10   | IGLV1-44  | MT3       | RP5-884M  | ABCB11    | CST6      | ENSG00000 | RAMP1     |
| IGHV4-59  | PTPRO     | GPR128    | C19orf77  | IGHV1-18  | MYO18B    | IGHA1     | PRMT8     | COL9A3    |
| ZIC2      | PAH       | C8orf22   | PIGR      | IGHV5-51  | GSTA1     | PCSK1N    | DLX1      | VSNL1     |
| SAA2-SAA4 | RP11-362F | SRRM4     | ENSG00000 | IGLC2     | IGKV3-15  | SCARA5    | MYH6      | EN1       |
| ENSG00000 | HOXD13    | GDA       | IGHA1     | IGLV1-44  | RP11-397G | BEX1      | COBL      | HOTAIR    |
| DUOXA2    | FAM155B   | GABRA3    | RP11-672L | IGLV8-61  | AQP9      | IGLV3-9   | IGHGP     | FEZF1-AS1 |
| PON1      | MEP1A     | SULT4A1   | PCDH9     | DDC       | CYP3A7    | IGLV3-1   | SORCS3    | C1QL4     |
| UGT2B11   | TMEM178   | LYVE1     | SPATA17   | IGHV1-2   | CTB-43E15 | ELF5      | SYT6      | CDH4      |
| AC079466  | RAMP1     | CNPY1     | F5        | ENSG00000 | CYP4F22   | ERP27     | C1QL1     | ZIC1      |
| TACSTD2   | IGHV4-61  | GABRG1    | RP11-527D | CA10      | ENSG00000 | CCK       | NOG       | ADCY2     |
| ENSG00000 | TM4SF4    | TEKT1     | SLC35F3   | RP11-380J | CXCL1     | LEP       | ZNF804A   | SLC22A3   |
| IGHV4-31  | SLC14A1   | AC004540  | ADAMTSL1  | FABP6     | RP11-556E | CHP2      | CARTPT    | STRA6     |
| ACOT12    | MYH11     | LINC00486 | ALDOB     | C5orf27   | CNNM1     | RP1-60O19 | CNTN6     | SGCG      |
| SLC22A1   | SLC6A20   | NKX2-5    | RP11-2E17 | RALYL     | SLCO4C1   | PI3       | IGHV5-51  | IGHV1-46  |
| DUOX2     | IGLJ2     | IGLV3-1   | DCAF12L2  | FREM1     | FDCSP     | TRPV6     | GRIA1     | PTPRQ     |
| RP11-510N | IGKV2-24  | TMEM235   | ENSG00000 | TMPRSS4   | PRAMEF10  | HABP2     | MAGEL2    | HS6ST3    |

|                 |           |                 |           |                 |                 |                 |           |            |
|-----------------|-----------|-----------------|-----------|-----------------|-----------------|-----------------|-----------|------------|
| SEMA3E          | MAGEB17   | CR1             | IP6K3     | MTTP            | WI2-2610K       | ENSG00000000000 | CBLN4     | PGM5-AS1   |
| IGLV2-11        | IGHV3-72  | PCDHGB1         | RAB3B     | IGFN1           | FETUB           | SLC38A3         | CADM3     | SYNDIG1    |
| SLCO1B3         | PCP4      | OR4N2           | HYAL4     | CPA4            | PROM1           | ATOH1           | MT1G      | IGLV3-10   |
| SLC3A1          | ANPEP     | NPTX1           | HMGA2     | SLC18A3         | PAPPA2          | CALY            | RSPO4     | RP11-8651E |
| PTH2R           | AP003774  | EDN3            | TPSB2     | IRX6            | CLDN2           | CHIT1           | TRPC7     | C5orf38    |
| F7              | NOS2      | WDR38           | PCDHA11   | IGLV2-14        | RP11-242J7      | IGLV1-40        | PCDH19    | NRXN1      |
| LCN2            | IGKV1-27  | RPRM            | HPGD      | FBXL21          | CHST9           | EREG            | TRH       | FGF16      |
| CP              | EDAR      | CCL7            | LAMB4     | FOSB            | MT1E            | IGLV3-25        | ACTL8     | DSG2       |
| PTGDS           | LINC00261 | LRTM2           | B4GALNT2  | TMEM92          | IGLV2-14        | ENSG00000000000 | RP11-92A5 | RP11-328N  |
| DEFB1           | QPRT      | RAB3C           | SPINK7    | COMP            | NRCAM           | KCNH6           | IGJ       | TCEAL5     |
| UGT3A1          | MOGAT2    | KRT75           | IGHM      | ANGPTL3         | NRG1            | FCRL1           | BTBD17    | COL22A1    |
| FXYD3           | IGHV3-48  | STOML3          | AC069213  | SLC15A1         | FSTL5           | SCTR            | KCNK10    | MDFI       |
| ACE2            | KRT20     | CHRNA4          | CLEC2L    | C1orf116        | CLDN10          | IGKC            | C4orf50   | KRT75      |
| GPR128          | RBP2      | AFF2            | IGLC3     | LIPH            | ENSG00000000000 | INSM1           | BCHE      | GABRA3     |
| UGT8            | ECHDC3    | GFRA1           | CLEC4G    | RP11-807H       | GLS2            | A4GNT           | SHISA9    | AC104135   |
| ENSG00000000000 | SLC15A1   | HOXD11          | ZNF536    | PRR15L          | CHST4           | FAM159B         | HOXA-AS4  | MAGEA6     |
| ABCB1           | TRIM54    | SLC1A6          | ERVFRD-1  | C1QL4           | POF1B           | APOA1           | DES       | HS3ST3A1   |
| SLC39A5         | GYG2P1    | PAX1            | ZNF209P   | CXCL13          | RP11-320N       | SLC26A3         | NOV       | FEZF1      |
| PSG4            | GABRA2    | RBFOX1          | ARSE      | TMEM52B         | RTP3            | RP11-109L       | IGHV3-23  | RP11-210M  |
| UGT1A1          | PLA2G3    | MIR219-2        | OXGR1     | CTC-327F1       | SLC13A5         | MUC15           | SSTR5-AS1 | SYNPO2     |
| IGKV3-15        | ASCL2     | LRRC15          | COL11A1   | SLC30A2         | NPY6R           | HEPACAM2        | WFDC2     | CNTFR      |
| KRT6C           | PRAME     | CD209           | IGHA2     | ENSG00000000000 | BTNL8           | IGHV2-26        | NPPC      | ST6GALNAc  |
| HAO2            | DRD2      | VWC2            | COCH      | GREM1           | DCDC2           | IGLV2-14        | SSTR1     | HMX1       |
| LPAR3           | FER1L6    | LHX9            | TMC5      | ANXA13          | TRHDE           | SERPINB5        | GLDN      | IRX2       |
| PROM2           | TNNT1     | FA2H            | RP11-280C | FAM83B          | PRODH           | HOXB9           | PRLR      | ANGPTL1    |
| CPN1            | DKK4      | HOXB5           | APOB      | PADI1           | ENSG00000000000 | IGHG2           | CALCB     | ADCY8      |
| RP11-89K2       | SHISA9    | MMP1            | SPON2     | IGLV3-25        | MSI1            | LINC00675       | SLC1A2    | VWC2       |
| CYP24A1         | SCARNA5   | ENSG00000000000 | RP11-43F1 | DACT2           | RP4-765C7       | SLC13A2         | CDH7      | RP6-24A23  |
| CTD-2377D       | CXCL9     | IGLV6-57        | ELMOD1    | CDHR5           | SLC3A1          | MIA             | KCNJ9     | IGHV3-33   |
| FOLR1           | CYP4F2    | GSTM5           | RP11-513C | TEX11           | SLC16A9         | CYP24A1         | MS4A8B    | HS6ST2     |
| FCRL5           | C17orf77  | GJB2            | PTH2R     | MMP7            | MUC3A           | PRSS3           | RYR2      | FABP4      |
| IGLV1-44        | RP11-1220 | SCRT1           | PCSK1N    | PAEP            | EFEMP1          | LINC00483       | ERBB4     | IGF2-AS    |
| SCTR            | IGHV3-53  | RP11-713C       | LGI1      | RGS7            | CNTN3           | IGHV1-24        | ZCCHC12   | SHISA6     |
| SCGN            | IGLV3-9   | ENSG00000000000 | CYP4B1    | PKLR            | UPP2            | RP11-294O       | IGSF1     | AP000688   |
| SPIB            | CHRD1     | SLITRK1         | ZG16B     | MAPK4           | ENSG00000000000 | FGFBP1          | NPTX1     | GALNT13    |
| DAO             | PADI3     | GSX2            | PPP4R4    | C2orf54         | IGHV5-51        | SLC39A5         | IGLV3-19  | POSTN      |
| C19orf77        | C6orf15   | SHISA6          | AHNAK2    | A1CF            | IGHV3-15        | SVOP            | PAX2      | ITGBL1     |
| APCS            | CCL21     | CCL20           | C2CD4A    | ANGPTL4         | AQP8            | RPSAP53         | MEG3      | KCNA1      |
| ITIH2           | PROM1     | C10orf105       | CHL1-AS2  | AGR2            | ARSF            | IGJ             | FAM153A   | ALX1       |
| PAX5            | DCDC2     | CHRM1           | PITX1     | NAT8L           | CYP2C8          | SLC6A19         | MC4R      | NELL1      |
| LAMA1           | PLIN4     | ECEL1           | THNSL2    | OGN             | AMN             | SULT1E1         | MRGPRE    | IGKV1-9    |
| NOTUM           | HLA-DQA2  | PCDHB17         | SRRM3     | DOC2A           | SEZ6            | UCN3            | FAM70A    | SHISA2     |
| HS6ST2          | SOX1      | COL8A1          | CTD-2243E | SLC17A1         | TENM1           | PPP1R1A         | LRP1B     | SYT4       |
| KRT6A           | IGLV4-60  | ZNF300P1        | ST8SIA6   | TRIM54          | ELFN2           | CXorf61         | CNTNAP2   | CPA3       |
| IGHD            | SCNN1B    | MME             | C9orf84   | F11             | CYP2A13         | IGKV1-5         | ANKRD20A  | IGF2BP1    |
| C19orf80        | LGR6      | IGHV3-15        | CTD-2124B | RP11-284H       | OTC             | IGLV2-11        | DACH2     | LRFN5      |
| PIK3C2G         | CTC-575D1 | CDH18           | PPP1R14C  | ENSG00000000000 | CAPN6           | MEP1A           | SHISA7    | SOSTDC1    |

|           |           |           |            |           |            |           |          |            |
|-----------|-----------|-----------|------------|-----------|------------|-----------|----------|------------|
| IGLV3-27  | AGR3      | RP5-1119A | EEF1A2     | PLA2G12B  | IGLV3-1    | IGLV5-45  | IGLL5    | BARX1      |
| CNTNAP5   | B3GALT5   | AGXT2L1   | BICC1      | COL11A1   | SPINT1     | BLK       | SDR16C5  | ENSG00000  |
| CFHR4     | CHIT1     | FRAS1     | SPESP1     | RP11-5130 | MT1M       | NPIPL2    | ASIC2    | GDF10      |
| TMEM72    | SLC1A7    | SHD       | FER1L6     | HLA-DQA2  | FOXQ1      | IGKV4-1   | SOX9     | ADCY5      |
| KRT5      | NTS       | SCN7A     | ZNF99      | TYRP1     | EPO        | ADH1B     | VSX1     | BTC        |
| AC144833  | C10orf112 | NEUROD2   | KLHL34     | SLC4A9    | APOF       | MARCO     | DCC      | PRELP      |
| IGHV3-48  | TRIM7     | CD70      | FUT9       | IGHV3-23  | ENSG00000  | IGLV3-27  | BHMT     | MUM1L1     |
| IYD       | HPN       | EREG      | RP11-2N1   | SPINK13   | SULT2A1    | IGKV1-9   | CYP21A1P | CNTN4      |
| CYS1      | PKLR      | ENSG00000 | SLC30A2    | PRODH2    | HEATR7B1   | FXVD2     | NPTX2    | DCAF12L1   |
| KIF1A     | IGLV7-43  | C6orf141  | TMSB4Y     | SLC2A2    | ECEL1      | MUC4      | AC109309 | EYA1       |
| IGKV1-6   | MAGEA11   | HOXA10    | GLB1L3     | CYP4F3    | SLC6A19    | MYEOV     | BCL11A   | STMN2      |
| LEMD1     | SLC38A5   | GS1-211B7 | SGCD       | NKAIN4    | C3P1       | NXF3      | AC079776 | IGSF1      |
| SULT1C2   | SBSPON    | ZNF560    | FAM189A1   | IGHV1-46  | ENSG00000  | CAPN9     | PIANP    | PITX2      |
| PROM1     | BEX2      | SFRP5     | FOLR1      | MYO3B     | ANXA13     | SEZ6L     | PLCH2    | KERA       |
| TNS4      | TDGF1     | MMP12     | SLC6A20    | IGKV3-15  | COL22A1    | ENSG00000 | DUSP2    | SLITRK5    |
| CPB2      | L1CAM     | PABPC5    | KCNU1      | RPS6KA6   | CFHR3      | IGHV3-13  | PCDH15   | ENSG00000  |
| RP11-116D | GREM1     | TACR1     | SMTNL1     | CD5L      | AHSG       | KLK11     | KCND2    | IGHV1-2    |
| MTTP      | B3GNT7    | TNR       | MTND1P23   | ENPP7     | COMP       | PLA2G2F   | RSP01    | IGHV3-21   |
| DIO1      | LINC00668 | PITX1     | C2orf72    | AGXT2     | IGHM       | COL10A1   | MDGA2    | ZNF560     |
| FAM99A    | IDO1      | RP11-328N | CDH3       | IGLV1-47  | UGT1A2P    | C4BPA     | ST8SIA2  | CYP11A1    |
| IGHV1-2   | SHISA6    | MNX1      | MST1L      | TCEAL2    | UGT1A3     | FCRLA     | SCARA5   | FOXL2      |
| CD19      | HOXB8     | TRDN      | CTB-52I2.8 | LGI4      | PNCK       | IGHV4-59  | STAC2    | CXCL13     |
| SERPINA10 | CCL25     | NNMT      | CLDN10     | CNTN3     | FRAS1      | IGHGP     | CALB2    | HSPB7      |
| APOA4     | EN2       | C7        | TDRD5      | KCNJ13    | NAT2       | CEACAM18  | FOSB     | DIO3       |
| VWA2      | BEST2     | MFAP5     | SLC38A8    | C19orf21  | VNN1       | IGHV3-49  | C10orf85 | KCNQ2      |
| SYT13     | PEG10     | IGHV3-33  | CA8        | CCL19     | NNMT       | IGHV3-23  | SH3GL2   | NTNG1      |
| LTF       | SLC6A4    | SPOCK3    | ENSG00000  | EPN3      | TRHDE-AS1  | IGLL5     | IGLV2-11 | IGHV3-11   |
| PGLYRP2   | KRT40     | NEUROD4   | NTNG1      | IGHD      | UGT2A1     | IGKV2D-29 | ELMOD1   | ROS1       |
| RP11-115D | PPP2R2C   | CHRNA9    | ABCA13     | SCNN1A    | MFAP4      | IGLV4-69  | ACVR1C   | SCG2       |
| AGXT2L1   | COL9A3    | HOXC9     | EYA4       | TGFBI     | DSCR8      | PAEP      | GYG2     | FBN3       |
| RP11-242J | IGHV2-26  | ASIC4     | PHF21B     | TF        | DQX1       | IGHV3-33  | NELL2    | DLX6       |
| FXVD2     | COL11A1   | IGKV1-9   | FRMPD4     | IGHV4-59  | UGT1A1     | LINC00668 | FGFR2    | RNF212     |
| IGHV3-21  | VNN1      | EN1       | CHIA       | LINC00617 | KCNB1      | PCSK1     | NAT8L    | HHATL      |
| HOXB9     | IGKV2D-29 | CACNA1B   | ENSG00000  | IGLV6-57  | CFHR1      | IGLV2-23  | HK2      | DMRT2      |
| RALYL     | SPINK1    | PPP1R1B   | CTD-2023N  | POF1B     | UGT2B15    | IGHV4-31  | NRXN1    | SFRP5      |
| VSIG1     | GPR143    | SHISA7    | TFAP2B     | IGLV2-11  | TMPRSS3    | CREB3L3   | CRYBA2   | PPP1R1B    |
| GABRB3    | EGF       | RP5-1177N | ZNF98      | DNAH11    | RP11-328J2 | IGHV3-15  | LRRC55   | MYH14      |
| ENSG00000 | IGLV5-45  | STAC      | MAB21L1    | ATP12A    | PODXL2     | UNC80     | ACTG2    | ZIC2       |
| NPTX2     | ARNY1     | IGHV4-59  | RBBP8NL    | ENSG00000 | RP11-438N  | FEZF1     | RPSAP53  | DMKN       |
| U1        | ADTRP     | GABRA4    | SLITRK4    | ENSG00000 | SIK1       | IGKV3-11  | CHST9    | SOX11      |
| CASR      | SLC30A2   | CCDC164   | RP11-627G  | B3GALT5   | PAGE5      | IGLV1-36  | SYNPR    | PAGE2      |
| SH3RF2    | RP11-3L10 | DAPL1     | MASP1      | LYPD6B    | ENSG00000  | PTPRN     | WNT10A   | RP11-526J2 |
| CXCL6     | NXF3      | SLC13A5   | MAG        | ENSG00000 | IGHA1      | ANGPTL7   | FAM163B  | CNR1       |
| GDA       | ISX       | CCL13     | FAM190A    | CCL20     | GBA3       | IGHV3-21  | IGLV1-44 | BEX1       |
| DPCR1     | SCARNA7   | AREG      | ENSG00000  | IGKV1-9   | RP11-443P  | FIBCD1    | GRID2    | PRSS12     |
| F5        | PTPRD     | ATP10B    | LINC00588  | CADM3     | B4GALNT4   | IGLV6-57  | ABCC8    | FAT3       |
| TNNI3     | UNC93A    | CNTN3     | MMRN1      | C16orf11  | PADI1      | MAFA      | CCL19    | TTYT14     |

|                 |                 |                 |                 |                 |                 |                 |                 |           |
|-----------------|-----------------|-----------------|-----------------|-----------------|-----------------|-----------------|-----------------|-----------|
| ACTBP12         | FAM189A1        | TFPI2           | NRG3            | CLEC18C         | IGLV3-25        | CDH17           | PON3            | CPZ       |
| TCL1A           | PSCA            | ENSG00000100000 | AC090044        | TMEM61          | ACTN2           | LINC00617       | SLC27A6         | KNDC1     |
| ANXA13          | PHGR1           | ENPP5           | MRAP2           | DAO             | ANKFN1          | NOL4            | TPH1            | SCN7A     |
| C6              | SYNE4           | IGHV3-21        | ESRRB           | C14orf180       | DSG1            | AQP12B          | IGHV3-15        | KCNK3     |
| C19orf33        | FOSB            | CELF5           | SLC12A1         | PKP3            | DCN             | SULT1B1         | USH2A           | STAC2     |
| GRM5            | HOXC11          | RP11-80F2       | SERPINA4        | ANO5            | RP11-4031       | ARX             | RP11-863P       | MAGEA12   |
| ENSG00000100000 | CWH43           | MEG3            | C6orf222        | C12orf56        | GABBR2          | FABP4           | GADL1           | KCNK2     |
| ENTPD3          | THBS2           | IGKV1-27        | ENSG00000100000 | CTD-2008P       | SFN             | PPP1R1B         | LGR5            | PCYT1B    |
| ATP13A4         | MT1E            | RP1-31001       | ELAVL2          | IGLV3-10        | TSPAN8          | IVL             | SPAG6           | RELN      |
| IGHV3-53        | CNTNAP2         | EBF3            | ZFHx4           | IGHV3-21        | KRT20           | CARTPT          | BANK1           | NPY       |
| CTD-2005D       | IGHJ3           | SYT1            | CECR2           | ZFY-AS1         | IGLV2-11        | NR1I2           | SLC6A2          | CDH1      |
| GYS2            | DMRTA2          | CNTNAP4         | PCDHA12         | VNN1            | RP11-323N       | CCL21           | NR1H4           | FNDC1     |
| UGT1A4          | KLK8            | SLITRK4         | GRIA1           | UCHL1           | RGSL1           | LRRTM3          | IGHV1-24        | C12orf28  |
| GALNT14         | CXCL13          | SULF1           | SLC4A4          | TTY14           | AC018865        | AC013275        | AREG            | DLX6-AS1  |
| MT1G            | RP11-329L       | PCDHGA10        | 11-Mar          | APOH            | IGHV1-2         | CRISP2          | NEUROD1         | C16orf89  |
| RP11-1C1        | FGF19           | BAI1            | SSTR5           | SLC39A5         | CDH15           | ONECUT1         | IGHV3-33        | DAB1      |
| CHRNA1          | SPOCK1          | MEDAG           | LRP1B           | ADH1C           | CFHR4           | PLIN4           | AC110619        | ZFP57     |
| IGHV3-33        | FEZF1           | LINC00645       | CEACAM7         | BEX1            | FAM151A         | IGLV1-47        | TM4SF4          | KCND3     |
| TDRD5           | SLC39A5         | C5orf49         | CCL21           | FCAMR           | TERT            | ENSG00000100000 | KCNG3           | HOXD13    |
| CDH17           | NRN1            | FAM180A         | LRFN2           | ALB             | ASCL1           | GAST            | IGHV1-18        | CNTNAP2   |
| FAM83E          | CAPN9           | TMEM196         | SNCAIP          | PITX2           | CCL20           | NKX6-2          | COL19A1         | IGLV4-69  |
| AC073479        | CPA6            | HCN1            | BTBD11          | IGHV4-34        | ADH1B           | GJB5            | SLITRK3         | CCL13     |
| GBA3            | ENSG00000100000 | KSR2            | CCDC178         | CALCA           | RP11-372E       | ITGB6           | TMEM229         | HOXD11    |
| PLA2G12B        | GPR128          | LINC00507       | PLEKHD1         | ENSG00000100000 | HP              | ARHGAP40        | IGHD            | FGFR2     |
| PEG10           | IGLV2-18        | ELAVL2          | TPSAB1          | IGHV3-15        | KIF1A           | APOBEC1         | SPP1            | DCAF12L2  |
| RP11-397G       | APOE            | NTSR2           | PCDHA10         | DGCR5           | IGHV3-21        | IGHV1-46        | ANKRD2          | DRD2      |
| CALB2           | APCDD1          | SST             | LINC00659       | TMEM72          | PRG4            | IGLC7           | FAM153C         | KANK4     |
| KRT20           | CXCL11          | DAO             | CTD-2081K       | IGHV3-49        | VTCN1           | SCEL            | CD5L            | WNT10B    |
| IGHV1-24        | CILP            | OTP             | MGST1           | IGKV1-16        | IGHV3-11        | LY6K            | GSTA3           | C3orf72   |
| ENSG00000100000 | KBTBD12         | CELF3           | CSDC2           | IGJ             | GPX2            | CALHM3          | CDCP1           | RP11-401P |
| KCNH6           | HOTTIP          | NKAIN4          | GCGR            | RP11-326C       | COX6A2          | GPRC5A          | COL4A6          | DIRAS1    |
| CALCB           | RP5-1052M       | PCDHGB6         | ANKRD34B        | IGHV3-11        | KCND3           | WISP3           | ATP2B3          | LMX1B     |
| EN1             | DIO3OS          | VGLL2           | ENSG00000100000 | CDHR2           | CYP11A1         | SFTA2           | IGHV4-39        | PNCK      |
| PLA2G2A         | KCNJ3           | L1CAM           | PSG9            | ENSG00000100000 | HS6ST2          | IGLC3           | TDRD5           | IGHD      |
| SLC44A5         | IGLC7           | FOSB            | PRAMEL          | HAVCR1          | CNTN1           | IGKV1-17        | EFNB3           | KB-1448A5 |
| SLC38A3         | KIAA1324L       | MRC1            | C1orf173        | IGLV4-69        | ENSG00000100000 | VWA5B2          | LPPR5           | CCDC8     |
| GPRC5A          | GCNT3           | NPTX2           | SHD             | GLYAT           | RFPL4B          | CD79A           | BMP5            | CDH2      |
| RP11-674N       | VIP             | HOXA-AS2        | AC109586        | KRT7            | EGFR-AS1        | APOB            | IGLV1-47        | NKX6-1    |
| FAM3B           | CA2             | ZSCAN1          | DCN             | NTNG1           | PAGE1           | ENSG00000100000 | PRSS12          | WSCD2     |
| MUC13           | SOSTDC1         | CPXM2           | IGKV4-1         | EEF1A2          | GDNF            | PLIN1           | ENSG00000100000 | IL17B     |
| DACT2           | FABP2           | WSCD2           | ACVR1C          | SIK1            | FOXP2           | ZFP57           | ENSG00000100000 | PCSK1     |
| BTNL8           | CYP4X1          | GABRB2          | CHI3L1          | UGT2A3          | ELOVL7          | IHH             | RMST            | TAGLN     |
| UGT2B15         | TPSG1           | RASSF9          | IGKV3-20        | WISP2           | DPT             | SLC34A2         | ADCY8           | LMX1A     |
| RP11-704M       | CADPS           | CBLN2           | RP11-500B       | AC006227        | FER1L6          | DQX1            | RP11-807H       | SPOCD1    |
| BHMT2           | DUSP4           | RIMS2           | RBFOX1          | LAD1            | TTY14           | SLC7A14         | PTPRO           | IGKV1-6   |
| PKP3            | GLRA2           | C1QL2           | TMPRSS11        | C12orf39        | PPP1R1A         | GKN2            | ADRB1           | NLGN4X    |
| HPGD            | FOXD1           | ENSG00000100000 | EGFR-AS1        | GPRC5A          | LRP2            | VIP             | PITX1           | CILP2     |

|            |            |           |            |            |           |           |           |          |
|------------|------------|-----------|------------|------------|-----------|-----------|-----------|----------|
| ANXA8      | OGN        | CELF4     | CALN1      | SLITRK2    | ACADL     | IGHV3-73  | TCEAL6    | BNC1     |
| WFDC2      | ALPPL2     | FGFBP2    | SOX8       | SLC38A4    | RP11-495P | RP11-211G | CDH4      | RSPO2    |
| HAMP       | TESC       | NPY       | CHIT1      | TMEM179    | TGM3      | SLC16A12  | SPINK4    | SIX2     |
| ENSG00000  | CXCL10     | BTC       | KLK11      | PKP1       | CTD-3110P | AC011306  | SPHKAP    | PPP1R1A  |
| HULC       | IGHD       | EMILIN3   | IGLV2-11   | TACSTD2    | NR1I2     | ENSG00000 | SLC30A3   | NTRK2    |
| MYOM3      | PCK1       | TMEM132I  | CTA-392E5  | TCL6       | NPFFR2    | RP11-4802 | MUC12     | DIO3OS   |
| WNT7A      | ENSG00000  | CDH19     | TRPM6      | FAM151A    | LRCOL1    | CXCL6     | TMEM190   | GLIS1    |
| OCA2       | hsa-mir-67 | PDGFRA    | IGLC2      | PCDH10     | RP5-1154L | CA4       | WBSCR17   | GALNT5   |
| IGLV8-61   | FBXO2      | KCNJ3     | TMPRSS4    | RANBP3L    | SEMA3E    | NTS       | ANO4      | FMO3     |
| CD5L       | PRELP      | RP11-208G | AQP5       | OLIG1      | FXYD1     | C11orf86  | RP11-46C2 | PEG3     |
| SYT8       | FABP6      | RP11-343H | GSTA3      | MST1L      | SLC39A5   | GPR128    | HTR3A     | PDLIM3   |
| AL773572   | O3FAR1     | RP11-357H | RP5-1043L  | LGALS12    | FXYD3     | IGHV4-34  | NAT16     | TNMD     |
| GLYATL1    | ABCA12     | HOXD9     | FGF7       | MFAP4      | GUCY2C    | SCNN1G    | C22orf42  | SCUBE3   |
| FCER2      | C5orf38    | RP11-92A5 | RP11-178A  | IGF2       | HOXA10    | GUCA1C    | DAPL1     | SHISA3   |
| ZIC5       | MMP12      | RP11-148L | KCNMB2     | SLITRK5    | BBOX1     | LRRC31    | CST1      | FGF7     |
| PLA2G2D    | RP11-750B  | CHI3L2    | IGKV3-11   | OPCML      | APOA1     | SLC2A2    | CBLN2     | PLD5     |
| RP11-211G  | ANXA10     | FNDC1     | IGLV2-14   | FAM153C    | EVPL      | TRIM31    | SFRP2     | CCL19    |
| RP11-522B  | SSTR5-AS1  | PLA2G5    | MMP1       | SLC7A13    | UNC93A    | CASR      | SV2B      | MYBPC1   |
| CYP4F3     | RNA45S5    | SNCB      | LAMA1      | DPYS       | SERPINC1  | IGKV1-16  | CTD-2194D | IGHV4-34 |
| HABP2      | ACTG2      | MET       | SSTR5-AS1  | FAM3B      | RDH16     | AC006262  | ALOX12B   | CECR7    |
| MOGAT2     | DPP10      | ENSG00000 | RP11-680F  | IGHV3-33   | ALDOB     | IGLV1-51  | BAI1      | TRIM63   |
| ANXA10     | SERPINA1   | CXXC11    | ABO        | IGKV1-17   | IGHV1-46  | PADI3     | IGHV4-59  | CSAG1    |
| ATP10B     | SLC28A3    | IL6       | PPP1R1B    | RP3-523K2  | CTD-3098H | IGHV2-70  | LINC00643 | ANO5     |
| IGKV1-17   | SLC22A11   | CBLN1     | TMEM132C   | KLK6       | IGF2BP3   | ALPI      | HPCAL4    | RYR2     |
| GJB5       | SAMD5      | SLC7A3    | MMP26      | TMEM207    | ENSG00000 | IGLC2     | TNNT2     | FAM189A1 |
| IGHV3-49   | PROM2      | LILRA4    | PRKG2      | BBOX1      | WNT4      | RP11-1220 | RSPO2     | MYL1     |
| EEF1A2     | HABP2      | ACAN      | TMEM30B    | FOXI2      | RP3-340I3 | AC073218  | AC244102  | IL11     |
| NEB        | KIAA0226L  | CECR7     | ENSG00000  | TM4SF5     | MUC15     | CGB       | SLC47A1   | CDH15    |
| GUCY1B2    | HLA-L      | OGN       | CAMK2B     | FBN3       | IGSF9     | FAM129C   | ZMAT4     | CMA1     |
| MMP7       | C7         | CBLN4     | MTUS2      | AFM        | RAB3C     | IGHV1-58  | MNX1      | MOG      |
| HOXC10     | RPS6KA6    | THNSL2    | CYP3A7     | GALNT5     | AGXT2L1   | IGHV3-64  | IGLV3-25  | MSI1     |
| IGFBP1     | SLFN13     | NKX2-1    | PGR        | CLDN2      | RAB25     | SSTR5-AS1 | GDNF      | HRASLS5  |
| PAQR9      | IGLV3-27   | GBX2      | ENSG00000  | SOWAHA     | IGFALS    | CHST9     | FRMPD3    | NKD2     |
| MUM1L1     | RP11-436H  | HOXA11    | BEX1       | LOX        | PRKY      | RP3-340N1 | MT1F      | ALDH1A3  |
| C5orf38    | ACTBP2     | WT1       | U47924.27  | FRMD1      | RP11-20D1 | CDH22     | CHRD1     | CXCL9    |
| RP11-127I2 | TBX18      | MDGA2     | PART1      | ST8SIA6    | PROL1     | IGKV2-24  | RP11-260A | MYH2     |
| RBBP8NL    | FN1        | MOXD1     | MCCD1      | OR2I1P     | IGF2-AS   | GATA5     | RP11-707A | PDGFRA   |
| HLA-DQA2   | CTD-3035D  | KCNT1     | EHF        | PTPRN      | RP11-81H1 | TMEM132I  | IGKV1-9   | AC108142 |
| RP11-554A  | MYEF2      | PTPN5     | PRR15      | CTC-327F1C | CYP2C9    | F11       | PPP1R1A   | FAM101A  |
| TMPRSS3    | ABCB1      | GLRA2     | VWDE       | GRIK3      | PI3       | SOX21-AS1 | GREM1     | AQP4     |
| BLK        | RNU5A-1    | GREM1     | RELN       | ENSG00000  | HTR1D     | SLC4A4    | IGKV3-15  | TMOD1    |
| COL11A1    | SERPINA10  | PRKG2     | MTND4P24   | GUCA2B     | ZIC5      | ENSG00000 | MIR770    | ST8SIA2  |
| SLC22A9    | LGR5       | DACT2     | PACSIN1    | IGLV10-54  | GLRB      | RP11-424G | ENSG00000 | SERPINB5 |
| PDZK1IP1   | IGKV3D-20  | RNU4-1    | FRG2C      | CHST9      | RP1-27K12 | TMEM63C   | PCP4L1    | MEGF10   |
| IGKV1-9    | PKP1       | ENSG00000 | RP11-371I1 | IGLV1-51   | AC068535  | MYO1A     | REN       | PI3      |
| GUCA2A     | AQP9       | HES5      | TRGC2      | STK33      | IGJ       | IRX2      | SPON1     | FAM180B  |
| SULT4A1    | ENSG00000  | ALPK2     | TCL6       | ENSG00000  | REG1B     | SERPINB4  | TMSB4Y    | GSTM5    |

|          |                 |            |           |                 |            |                 |                 |                 |
|----------|-----------------|------------|-----------|-----------------|------------|-----------------|-----------------|-----------------|
| C9orf152 | SOX14           | RBFOX3     | VAT1L     | APCDD1L         | MUM1L1     | IGHV3-48        | LY6D            | COL6A6          |
| CLDN18   | PHYHIPL         | AQP9       | IGHV5-51  | EPB41L4B        | ENPP5      | GPR119          | PART1           | MYH7            |
| PPP1R14C | MAT1A           | CDKN2B-AS1 | FAM3B     | LINC00473       | CTC-50503  | IGKV2-29        | CRHR1           | IL20RA          |
| IBSP     | F5              | PCDHGB2    | GREM1     | SMOC1           | COCH       | KIF1A           | CALY            | ABCA8           |
| FCRL2    | MT1G            | PI16       | KCNG1     | FGF7            | MAP7D2     | ATP10B          | GLT25D2         | LYPD6B          |
| IGHV4-34 | MAGEA12         | WISP1      | C16orf11  | REG3G           | VIL1       | SH3GL2          | SLC9A2          | SLITRK2         |
| IGFL1    | DMKN            | COL21A1    | PTGES     | STAP1           | TDGF1      | IGHV3-72        | SLC22A3         | ENSG00000100000 |
| APOC1P1  | HOXB9           | CAMK2A     | ODAM      | SORCS2          | RP11-43615 | COMP            | ATP4A           | IGF2BP2         |
| ADAMTS16 | RNU5B-1         | HRH3       | CTC-504A5 | CNTNAP5         | UGT2B10    | ALDH3A1         | AGRP            | MXRA5P1         |
| SLC6A20  | C4BPA           | PCDHA11    | CECR7     | RP11-7060       | TDO2       | APOBEC2         | DHCR24          | EPYC            |
| CCL21    | TFF3            | SLC7A10    | TERT      | TMEM82          | FLNC       | KCNJ15          | FAM150B         | RP4-555D2       |
| FAM135B  | PNLIPRP2        | RNF128     | CADPS     | RP11-626P       | FOLH1B     | GPR110          | UNC13C          | CYP4B1          |
| SLC28A3  | PLAC8           | ERMN       | PRSS16    | GAD1            | C1QL1      | CD19            | NXPH1           | SPOCK3          |
| GC       | RASGEF1A        | BTBD17     | RPL13AP17 | RP11-526F       | RASEF      | FABP6           | GRIK3           | FUT9            |
| AC018804 | SATB2-AS1       | DPP10      | OR211P    | GBA3            | RP11-6B4.1 | SFN             | KCNH8           | MEST            |
| GCGR     | AMH             | ATP1A3     | GRM1      | ALDH8A1         | MCCD1      | GJB6            | RP11-750B       | CDH18           |
| POPDC3   | NKX2-1          | FXYP7      | RP11-1260 | GUCY1B2         | HPR        | SERPINB2        | CACNA1A         | GAP43           |
| G6PC     | AC018738        | AC095067   | TIMD4     | SLC6A13         | CDH16      | IGF2BP3         | LINC00617       | GRIA2           |
| IGHV2-26 | ASPN            | KCNJ16     | SFRP4     | RP11-742N       | HMGA2      | CIDEA           | MOXD1           | PAX1            |
| SHISA9   | ENSG00000100000 | TCF23      | LRR14B    | CKMT2           | B3GAT1     | SERPINA4        | RP11-401P       | GDF6            |
| KCNK9    | ALPK3           | CHD5       | CALCR     | BMP5            | RP11-495P  | IGFL2           | GPC3            | HLA-DQA2        |
| SCARA5   | PLA2G4A         | NOS1       | RP11-834C | FUT6            | GBP7       | IGHV3-74        | AC092165        | RBP4            |
| AKR1B10  | HSPB6           | NKAIN1     | CPEB1     | DEFB1           | IGLV3-10   | IGKV3-15        | RP11-7380       | ISL1            |
| SLC34A2  | HIST1H1E        | CXCL3      | C14orf105 | BHMT            | NPW        | KBTBD12         | GRM4            | MYH1            |
| PTGFR    | RBP1            | SLC6A7     | PPM1E     | SPOCK1          | IGHV1-24   | LHFPL4          | CTD-2195N       | TRHDE-AS1       |
| TGM3     | AC016708        | SOX3       | FAM150A   | RNF186          | IGLV6-57   | ENSG00000100000 | RXRG            | TNXB            |
| PVRL4    | IGLV9-49        | GALNT5     | IGLV3-19  | CHGB            | GNMT       | IGKV6-21        | ENSG00000100000 | ALPK2           |
| AJAP1    | OTC             | CLCA4      | ABP1      | F5              | FOXN4      | S100A14         | AC005082        | ADAMDEC1        |
| FOXJ1    | PIPOX           | MXRA5P1    | HABP2     | ADAM18          | IGKV1-9    | PKHD1           | PCDHA4          | SLN             |
| IGHV3-74 | SLC19A3         | PRRG3      | CXCL14    | AC016708        | RP11-2940  | LINC00261       | FABP4           | TPTEP1          |
| GPR115   | WISP3           | SPON1      | SCGB2A1   | PTGER1          | GABRA2     | LRR15           | FGF9            | CCBE1           |
| FAM83A   | FND1C1          | AZGP1      | CTD-2193G | SLC5A10         | SYT9       | IGHV3-53        | HOXC10          | ENSG00000100000 |
| FCRLA    | IL33            | RP11-424G  | RP4-799P1 | ESRRB           | PAQR5      | PRSS33          | CALN1           | IGKV1-16        |
| FGF21    | HUNK            | WNK2       | SLC16A12  | NUPR1L          | SIM1       | IGKV3D-20       | CACNA1E         | CLEC4G          |
| COL9A3   | CTB-118N6       | DLX2       | INSRR     | GRIN2A          | IL8        | IGLV7-43        | PCDH8           | NCAM2           |
| SLC30A2  | PLCB4           | IDO1       | FXYP2     | FABP4           | SLC30A2    | PAPPA2          | LINC00461       | DARC            |
| IGKV1-27 | RP11-372E       | TMEM132E   | STEAP2    | GDA             | RP11-30J2  | IGLV7-46        | AL122127        | SERPINB7        |
| AOX1     | PTGS2           | COL3A1     | CRABP1    | ENSG00000100000 | LOXL4      | EGF             | CHRNA2          | TMEFF2          |
| IGLV4-69 | CNN1            | CUX2       | CNTNAP2   | HOXB9           | ZG16       | ZBED2           | NKAIN4          | ANO4            |
| KCNJ16   | VSTM2L          | VWA3A      | CNR1      | FREM2           | RP11-157P  | ZG16            | EPHA6           | MOXD1           |
| VSTM2L   | CTD-2377D       | CADM3      | EMX1      | PDGFRA          | PGLYRP2    | UGT2B7          | AP001046        | PAX9            |
| SEBOX    | TMIGD1          | KCNG1      | UGT2B7    | PPP1R14D        | ADAMTS16   | GYG2P1          | CBLN1           | ADAM23          |
| SERPINB2 | SLC6A19         | HOXD8      | CNTFR     | RPSAP53         | SLC2A5     | FUT9            | LRRTM3          | MMP12           |
| CD1A     | POSTN           | BARX1      | GSTM5     | SERPINA4        | GLT1D1     | CRCT1           | KCNG1           | CILP            |
| PGC      | NPIPL2          | KIAA1644   | GLRB      | LSAMP           | KCNJ3      | NCCRP1          | CES1            | KLK4            |
| NLGN1    | ENTPD8          | ABCA13     | CTD-2083E | IGLV3-9         | CACNA1H    | RP11-89K2       | HOXB8           | CLVS2           |
| B4GALNT2 | RPSAP53         | HOXC-AS1   | RP3-416H2 | FAM153A         | C1orf106   | IYD             | KCND3           | NOTUM           |

|           |           |            |           |           |            |           |           |          |
|-----------|-----------|------------|-----------|-----------|------------|-----------|-----------|----------|
| TFR2      | CTD-2666L | HAPLN2     | C1orf116  | OVCH2     | SLC28A1    | SLC8A2    | RP11-375B | TNFAIP6  |
| PRKG2     | SCEL      | IGHV1-46   | ASCL4     | RP11-165D | RP11-152P  | XXbac-B44 | PAX8      | GLB1L2   |
| ABP1      | C11orf86  | PLEKHG4B   | CYP26C1   | SLC16A9   | AQP6       | MUC21     | CECR7     | NPAS4    |
| CYP2C8    | NKAIN2    | FAM123C    | RYSR2     | CYP2B6    | RP4-763G1  | ZIC2      | MAGEE2    | HR       |
| VAT1L     | ISM2      | GRIN2A     | LEF1-AS1  | IGHV1-69  | S100A14    | ARL14     | MAOB      | EPPK1    |
| WDR72     | ENSG00000 | RP11-32K4  | C12orf77  | CLRN3     | GRIA3      | IGHV3-43  | CLMP      | TENM1    |
| AQP9      | SOX8      | SPHKAP     | RP11-255M | AP000330  | COL11A1    | SDR16C5   | RBFOX3    | SLITRK6  |
| RP11-522B | GAS1      | ENSG00000  | AC011298  | FMO1      | SULT1E1    | MAB21L2   | IP6K3     | LRR4C    |
| KCNK2     | IGHV4-28  | SSTR1      | CRLF1     | ENSG00000 | ATRNL1     | B4GALNT2  | RP11-320G | GRIK3    |
| RP11-1151 | CHST5     | MAPK15     | COBL      | HNF4A     | SLITRK3    | RP11-742N | LUM       | LHX9     |
| MME       | ALDH1A2   | AP000688   | ENSG00000 | PRKG2     | ASPHD1     | CILP      | PTGDS     | SPRR2F   |
| TINAG     | PCDHGA10  | ENSG00000  | SYTL5     | IGLV7-46  | SYT1       | TINAG     | DLX2      | MYO18B   |
| PHACTR3   | IFI44L    | DMRT2      | HOXA11-A  | HSF4      | RP11-371I1 | CYP2C9    | PTHLH     | TYRP1    |
| MFSD6L    | SLC18A1   | TMEM130    | TMEM178E  | MUC13     | SLC13A2    | ODAM      | COX6CP1   | RASEF    |
| CXCL14    | DLX6-AS1  | DDIT4L     | CPA3      | TUBA3E    | RP11-328K  | SERPINA10 | TUBBP5    | EMID2    |
| GAD2      | BRSK2     | SLC6A17    | ISM2      | HAPLN1    | CYP39A1    | RP13-870H | SOX11     | VIPR2    |
| UGT3A2    | ERAP2     | CAMKV      | EMX2OS    | RP5-1120P | TBX4       | KIRREL2   | IGHV1-46  | ALX4     |
| PSCA      | RP11-326C | MYBPH      | PCOLCE2   | SLC22A13  | IGLV4-69   | CDKN2A    | CDH9      | METTL24  |
| C2CD4A    | CYP1B1    | FGF10      | ENSG00000 | IGLC7     | ENSG00000  | ROS1      | SLC38A11  | SAA1     |
| SCG3      | MZB1      | SLC8A2     | SLC5A1    | RAB42     | AC004862   | CHRD1     | TRHDE     | CNTN3    |
| TRHDE     | RBP4      | CSMD3      | IGKV1-5   | RIC3      | MAFA       | SEBOX     | HMX2      | PTPRN    |
| MMP12     | SLC26A2   | CALB2      | CRYAB     | RP11-317M | APOA2      | VGLL1     | GALNT9    | EYA4     |
| INS       | KRT5      | VAT1L      | LINC00507 | HTR6      | PRSS16     | DPP6      | HSD3BP2   | PPP2R2C  |
| AKR7A3    | APOD      | ENSG00000  | NOS1      | NEGR1     | IGLV8-61   | IGHV2-5   | FSTL4     | IGHV3-74 |
| LAMP5     | DLX3      | IGLV1-51   | AC005077  | GP2       | AC073218   | MOGAT2    | ZCCHC16   | MORN5    |
| KIAA0125  | SCARNA10  | DPT        | USH1C     | AZGP1     | SLC1A7     | RP11-325F | ANKRD34C  | OGDHL    |
| SEC14L4   | MTND2P28  | HMCN2      | SLC39A2   | RN7SK     | GAL3ST1    | AGR2      | ARC       | SH3GL3   |
| TNNT1     | C3        | PPP1R1A    | ADRB1     | IGKV1-6   | MTND4P12   | HOXA11    | FAM222A   | RIMBP2   |
| ENSG00000 | NOX1      | RP11-469N  | RP11-167H | PRND      | MPPED1     | IGLV9-49  | DDIT4L    | PLEKHG4B |
| SLC14A1   | KIAA1549L | LY6H       | TRIM72    | FAM150B   | GABRA3     | SERPINA5  | WIF1      | SOX8     |
| B3GALT2   | TAC1      | RP11-471J1 | ASCL1     | ENSG00000 | CTSE       | RP1-310O1 | MAFA      | IGHV3-49 |
| HOXC9     | HYAL1     | SLC6A15    | FLG       | CRTAC1    | RP11-261N  | NORM1     | OGN       | VGLL3    |
| ATP2B2    | SERPINA6  | TFAP2A     | RP11-469N | PTGER3    | VSTM2L     | HAS1      | NTNG1     | HIF3A    |
| MT1H      | CR2       | PCDHA6     | UBD       | MMP9      | FOXJ1      | RP11-101E | RP11-98L5 | DBC1     |
| CA8       | OXGR1     | RP11-275H  | DUOX2     | IYD       | EGF        | LBP       | CYP26C1   | NPTX1    |
| RTP3      | NTSR1     | UNC13C     | HOXC-AS3  | CDH9      | ARG1       | AC021218  | PKIB      | IGKV1-17 |
| HSD17B13  | ARSE      | TENM2      | RP11-510D | SHISA3    | TFF2       | MMP13     | SDR42E1   | COL9A1   |
| STRA6     | ADAMTS15  | OTOS       | RP11-154C | ENSG00000 | COL4A5     | MXRA5P1   | VSTM2B    | KIAA2022 |
| S100A1    | SPON1     | SEMA3A     | IGHV3-23  | PTPN20A   | HHIPL2     | DEFA5     | CCL28     | REN      |
| CDO1      | KLHL13    | KIAA2022   | IGLV2-23  | KCNK9     | RND2       | CTD-2015G | HTR5A     | GYG2     |
| CLDN10    | IGHV3-13  | ARHGAP36   | IGLV3-25  | PSAT1     | C1orf64    | PIWIL1    | PLAC2     | MAPK10   |
| CTD-2587H | ENSG00000 | CES1       | CRIP3     | FER1L4    | PRR15L     | AC011298  | MKX       | WFDC1    |
| REG3A     | CLC       | SCN9A      | ENSG00000 | MUM1L1    | TMPRSS15   | MLK7-AS1  | ADORA1    | OCA2     |
| AC013275  | C11orf92  | AQP5       | CHRD1     | C3        | SYT8       | IGHV4-61  | FERMT1    | ALDH1L1  |
| FMO1      | CTD-2566J | CHRD1      | SLC38A4   | CUBN      | TFF1       | ADCYAP1   | RP11-728G | CSR3P    |
| SIK1      | CTNNA2    | TAC3       | ADH1B     | LMX1B     | ISLR       | HOXA10    | NTRK1     | KIAA1644 |
| SLC22A31  | FRMD1     | FAM110C    | CREG2     | IL1R2     | GHRHR      | HOTAIR    | B4GALNT4  | RORB     |

|           |           |           |           |           |           |           |           |           |
|-----------|-----------|-----------|-----------|-----------|-----------|-----------|-----------|-----------|
| EN2       | REEP1     | CYP4F12   | KCNG3     | CCBE1     | C2orf54   | ACTL6B    | SLC16A12  | FREM2     |
| BAAT      | AC092165  | GMNC      | NR1H4     | LINC00278 | DIO3OS    | LINC00671 | PACSIN1   | CXCL1     |
| IGKV3D-20 | ST6GAL2   | LRFN5     | SCNN1B    | SYT10     | ALDH1L1   | UPK3B     | SALL1     | DEFB1     |
| HHLA2     | ABCC2     | SH3GL2    | UNC13C    | BASP1P1   | SCGN      | FEV       | PTPRD     | SORBS1    |
| IGHV3-43  | CARD11    | NELL1     | TMEM246   | DHRS2     | CNTNAP2   | CIDEC     | PRLH      | SCN3A     |
| CHST9     | STRA6     | TCTEX1D1  | TWIST1    | RASL11B   | AC005550  | C1orf110  | RP11-438B | FOXF2     |
| CRISP3    | GCG       | C9orf24   | TMPRSS13  | TRHDE-AS1 | ACTL8     | ZNF736P9Y | MGARP     | GATA4     |
| CDH19     | MUC16     | MCTP2     | NXPH2     | INPP5J    | ZIC2      | NPHS1     | SNTG1     | SNAP25    |
| TMEM151   | CD79A     | FEV       | AC024560  | CYSLTR2   | KCNJ16    | HMGA2     | IGLV3-1   | FAM167A   |
| RP4-765C7 | SYNPO2    | PENK      | XK        | UGT1A10   | RP11-279F | EN2       | HHIPL2    | PGM5      |
| ENSG00000 | FABP4     | LHFPL4    | HOXA9     | SLC14A2   | MBL2      | PITX1     | AVPR1A    | SSTR1     |
| IGLV3-9   | TG        | C12orf39  | OR1L8     | CHL1      | IGKV1-17  | AC244230  | NR0B1     | PLXNA4    |
| IGLV1-51  | RP11-673C | NHLH1     | GHR       | CA4       | SSTR5     | LRRTM1    | C21orf88  | KBTBD12   |
| DCDC2     | HIST1H1B  | CDH7      | GPR110    | NR2E1     | RP11-587P | ACTG2     | MRAP      | WNK2      |
| RP11-469A | TMEM211   | GAL       | RP11-865B | MOGAT3    | MAGEB17   | CACNG4    | SYTL5     | FOXP2     |
| FAM3D     | KRT75     | PTGFR     | KRBOX1    | REG1B     | OCA2      | CCL20     | LUZP2     | ADAMTS8   |
| SULT1E1   | CTD-2377D | NKAIN2    | FAM110C   | IGKV1-27  | LDLRAD1   | MSLNL     | C1QL3     | RP11-429E |
| PODXL2    | SMOC2     | COL28A1   | HAPLN1    | GPC3      | PYCR1     | CHST4     | SLITRK2   | VAT1L     |
| CLDN6     | SEMG1     | HOXA3     | AKR7A3    | GPR37     | ASNSP1    | FAM123C   | MCTP2     | TMEM59L   |
| CHIT1     | SYN3      | COL23A1   | ZNF208    | SOST      | ENSG00000 | C1orf127  | AL022344  | PLXNB3    |
| PCDHA11   | RP11-267A | NXPH1     | LINGO2    | SYT9      | COX6CP1   | MEP1B     | ATP8A2    | SH3GL2    |
| CD207     | HOXC6     | OTX1      | SPP1      | LCN2      | CAMK2B    | GRM4      | RBFOX1    | ENSG00000 |
| AC016683  | AC018865  | NDST3     | SCN7A     | S100A1    | CXCL14    | IGFBP1    | TRIM29    | CAP2      |
| SIGLEC15  | D86994.2  | SKOR2     | LRRC37A4F | ELFN2     | POSTN     | GREM1     | GABRA2    | RP4-765C7 |
| ACMSD     | OR211P    | RP11-958N | DPYSL5    | CLEC18A   | CAPN13    | IGKV1-6   | CAPN13    | TRIM55    |
| SLC13A1   | ODAM      | MPPED1    | KIF1A     | AC092653  | IGHV3-49  | RP11-539E | PCDH7     | ABCC8     |
| ASPG      | EMB       | OTOG      | HTR3B     | MYH14     | GDA       | EPS8L3    | MYO3A     | DNAH11    |
| IGKV2-24  | FCGR3B    | ATP6V0A4  | KCNK1     | TRIM71    | PTGES     | SERPINB7  | ILDR2     | MYBPH     |
| HAVCR1    | OGDHL     | CAMSAP3   | LY6K      | SERPINA6  | PDGFRA    | RP11-1L12 | ENSG00000 | BMPR1B    |
| CRHR1     | ERP27     | TUBB4A    | RP11-742N | IL6       | ETV4      | PLA2G2D   | SIX3-AS1  | PTGES     |
| NEURL3    | SOD3      | LINC00617 | RGS7      | AQP9      | IGKV1-16  | RIMBP2    | BCAT1     | GRIK2     |
| KCNJ15    | CPLX2     | IGLV4-69  | PDE3B     | SLC28A1   | GATA5     | FAM150B   | LY6H      | LINC00645 |
| RP1-27K12 | ALDH1A1   | IGHV3-11  | FOXQ1     | CLMP      | TUBBP5    | PCK1      | RP6-109B7 | ANGPTL7   |
| CA4       | SAA2      | LINC00648 | STAC2     | NPC1L1    | SAA4      | SLC9A3    | VWDE      | RP11-400K |
| ABO       | MYEOV     | DARC      | IGHGP     | MGARP     | DNER      | PNCK      | RXFP3     | PTH2R     |
| SPAG17    | POU5F1B   | WT1-AS    | HOXA13    | NCAM1     | CYP4F2    | AGR3      | DLGAP2    | TBX5-AS1  |
| GYG2P1    | SLC38A4   | RN7SK     | C5orf49   | KIAA2022  | GPR158    | LGALS7B   | HCN4      | TMEM119   |
| GFRA1     | VENTX     | PTPRT     | CPA6      | KCNK2     | FAM134B   | KIAA0125  | IGHV3-11  | RSPO3     |
| SCNN1A    | TRPV6     | GALNT9    | ALDH3B2   | ESRRG     | MCOLN3    | ENSG00000 | IL8       | SYT14     |
| TFF3      | TMEM252   | NGB       | STAB2     | CTD-2335A | NAA11     | HP        | PKHD1L1   | ASXL3     |
| PKHD1     | BTNL8     | AC244102  | OGN       | IGKV2-24  | AC104135  | C6orf222  | IGKV1-17  | AR        |
| ENSG00000 | SYNM      | PVALB     | CTD-2298J | CES3      | GPC5      | OTC       | RP11-500B | TPSD1     |
| SERPINF2  | AC016739  | IGF2      | MMEL1     | IGHV3-48  | RAB3B     | ENSG00000 | COCH      | CNNM1     |
| CLDN2     | NMU       | FAM216B   | AP001626  | IGLV7-43  | CLGN      | KRT23     | RBP3      | IGHV4-31  |
| ENSG00000 | EPYC      | HPR       | RTP2      | IGF2BP3   | RP11-434D | GJB4      | IGHV4-34  | PCOLCE2   |
| CAPN8     | AF064858  | ONECUT2   | SEZ6L2    | KRT5      | OGN       | TM4SF5    | AC009410  | GABRB3    |
| IGLV9-49  | PRKAA2    | ARMC4     | LINC00189 | MTND1P23  | CDH22     | FCRL5     | CTB-3601  | PSG5      |

|           |           |           |           |           |           |           |           |           |
|-----------|-----------|-----------|-----------|-----------|-----------|-----------|-----------|-----------|
| RASSF9    | CFD       | SHISA2    | ATP10B    | NAPSA     | CBLN4     | DDC       | PCDHA13   | LSAMP     |
| POU2AF1   | ZBTB7C    | IGLV8-61  | CPA2      | RP11-213H | DIO2      | NKX6-3    | POMC      | HTRA3     |
| MS4A8B    | NEURL     | FGF13     | ENSG00000 | ENSG00000 | BICC1     | SOSTDC1   | PTGS1     | IGLV3-9   |
| SLC17A2   | LRP4      | ELAVL4    | IGLV3-21  | FXYD3     | RP11-1220 | CTD-2566J | SYT7      | CD300LG   |
| CHST8     | RP11-325F | GPR26     | ROBO2     | AC003984  | MMP12     | CNR2      | IGHV3-21  | SOX9      |
| EMX1      | CDH16     | MMP3      | LRRC15    | ANKRD2    | IGHA2     | CAMK2B    | TPSB2     | PCLO      |
| PHYHIPL   | APOB      | LIF       | AC013472  | DDN       | MAPK4     | KLK2      | DOK5      | ADAMTS16  |
| VSIG2     | IGFL2     | HPSE2     | IGJ       | RP11-766F | UGT1A10   | KRT7      | SCN2B     | HOXC10    |
| GPR110    | RP11-46C2 | NRG1      | HOXC10    | CR2       | KRT5      | MYO7B     | NDNF      | FBXL22    |
| PSG8      | BARX2     | RALYL     | C2orf54   | FIBCD1    | C2CD4A    | VSIG2     | ASCL1     | C6orf132  |
| ABCC2     | UGT2B15   | RP11-438N | RP11-313J | ADAMDEC   | CYP2B6    | ST6GALNA  | AHNAK2    | PTX3      |
| GBP7      | CCL24     | SCNN1G    | PCDHGA2   | IGHV2-26  | HFE2      | HHLA2     | PCDH10    | ENTPD2    |
| RP11-404P | CDHR2     | ALOX15B   | GPR27     | NKD2      | IGLV1-51  | DARC      | ALDH1L1   | FAM43B    |
| UGT2B17   | F13A1     | IGKV1-16  | HOXA-AS4  | TMSB4Y    | FERMT1    | GSTA1     | PTPRT     | RP11-424G |
| CNGB1     | HCAR1     | C5orf46   | LAMA2     | AC079630  | RP11-119D | WNT11     | TSPAN19   | IGKV1-27  |
| ADH6      | PPP1R9A   | TMEM229   | CYP24A1   | PART1     | TFDP3     | CYP2C18   | TENM2     | IP6K3     |
| IGHV1-69  | WT1       | EMID2     | TUBB3     | RP11-133F | FNDC1     | VGf       | KCNK17    | MEOX2     |
| PAK7      | PADI2     | WNT16     | KIAA1239  | COL4A6    | RP11-701P | TCEAL2    | ACTN2     | MAB21L1   |
| SLC27A2   | FRAS1     | RPS6KA6   | NELL1     | SLC23A3   | GCNT3     | RP5-884M  | STX1B     | MSX2      |
| TMPRSS6   | IGHV1-58  | LMO1      | POF1B     | TPSG1     | AFM       | NROB1     | CNTN2     | FOXQ1     |
| C6orf222  | NKD2      | VEPH1     | FBXL16    | GRIK5     | EPPK1     | NMU       | HAP1      | KIF5A     |
| NPC1L1    | PAX5      | NEU4      | LRRC52    | SUSD4     | C1orf186  | PDZD3     | PTGFR     | PPP1R12B  |
| UBE2U     | POU2AF1   | THBS1     | AC013275  | CYP17A1   | KCNK9     | CGB8      | AC007405  | LHX2      |
| TMPRSS13  | RP11-401P | KCNQ2     | RP11-142G | GPD1      | PCLO      | PROM1     | NLGN4X    | NFASC     |
| ITIH3     | GALNT8    | WDR69     | SCN9A     | ENSG00000 | PON1      | TRHDE-AS1 | BCAN      | PCSK2     |
| AHNAK2    | CALB2     | FLG-AS1   | PROM1     | RP6-191P2 | KANK4     | FOXJ1     | IGKV1-6   | CALN1     |
| RP11-443P | UGT2B7    | SEZ6L     | SCG5      | AP000688  | ENSG00000 | C1orf81   | IGKV1-16  | FMOD      |
| RP11-64D2 | VAV3      | TMPRSS7   | PRAME     | GDF6      | CALCA     | CTRL      | HMX1      | CASQ1     |
| SLC22A10  | RP11-706O | DPEP1     | KIAA1324L | HHIP      | IGKV1-6   | ENSG00000 | RP11-402J | BHLHE22   |
| INHBE     | MS4A8B    | ENSG00000 | ASPG      | EPHA7     | GPR133    | SIX3      | RD3       | SPEG      |
| IGLV6-57  | GABRB3    | RP11-742B | MUC4      | PI3       | FAM169B   | KRT81     | DGKB      | SAMD11    |
| TPPA      | IGHV3-43  | GABRA2    | CES1      | SLN       | RP11-946L | UGT2B17   | ENSG00000 | C10orf85  |
| MYO1A     | ADAM12    | ENSG00000 | SNAP25    | PTGDS     | RP11-526J | DPP10     | IGLV6-57  | GNAO1     |
| RIMS2     | KIAA1324  | DSCAML1   | LIPH      | MZB1      | MT1X      | GRIA2     | TLX2      | RP11-344E |
| FCRL3     | DKK1      | PCP4L1    | ENSG00000 | GLB1L3    | IL20RA    | SMOC1     | FAM153B   | PRND      |
| RP11-798K | TNFRSF19  | COL6A2    | LCN2      | RP11-211G | IGHV4-31  | GJB3      | FOXE1     | AIM2      |
| FETUB     | COL9A1    | GPR12     | TENM2     | SALL3     | LYPD8     | SAA1      | ZDHHC22   | F10       |
| IGHV3-73  | MS4A1     | SEZ6      | IGLV1-47  | B4GALNT4  | MASP2     | C6orf58   | SHISA8    | TSPAN8    |
| FAT3      | RASSF10   | ATP8A2    | KCNJ10    | ENSG00000 | ARSEP1    | OGN       | RP11-438N | MZB1      |
| TUBBP5    | MSI1      | DMRTA1    | IL20RA    | SLC47A1   | ADRA1A    | IGLV2-18  | CCK       | HOXA13    |
| PKP1      | ADIPOQ    | LGI3      | SELE      | IGHV4-31  | DEFB132   | SLC9A2    | RP11-23P1 | RBFox1    |
| IL6       | NLGN4Y    | SLC22A3   | GSTM3     | DIO1      | IGHV3-74  | HBB       | XKR4      | PAX7      |
| KCNH8     | KRT16     | CKMT1B    | RP11-666A | C11orf86  | SERPINA11 | KIAA1324  | PABPC1L2E | UGT8      |
| AC018865  | MME       | CLEC2L    | RP11-362F | NNMT      | APOA5     | CP        | UST       | IGHV1-69  |
| AGMO      | KIF26A    | KLHDC7A   | LINC00494 | TRHDE     | PART1     | TRIM54    | GAP43     | DUSP27    |
| CDHR5     | IGLV1-36  | UNC5D     | EMX2      | IGHV3-74  | SLC7A10   | BCAS1     | VGf       | LGI1      |
| TMEM179   | ID1       | IGLV1-47  | CALCB     | DPP6      | PKP3      | CAPN8     | ARMC4     | MKX       |

|           |           |           |           |           |           |           |           |           |
|-----------|-----------|-----------|-----------|-----------|-----------|-----------|-----------|-----------|
| ZIC1      | C2orf54   | S100A8    | GRIP2     | PADI3     | RP11-401P | TM4SF4    | MMP1      | SDK2      |
| AGR3      | SP5       | SGCD      | PDGFRA    | SLC17A2   | APOC1P1   | IFNE      | KCNA4     | THBS4     |
| PLEKHG4B  | HSD17B2   | SERTM1    | ASB11     | RP11-154C | ILDR2     | MOGAT3    | LBX1      | UCHL1     |
| ADRA2A    | ARHGDIG   | LUM       | ADCY1     | SEMA3D    | RP11-59E1 | PHACTR3   | CPNE6     | C2orf40   |
| C1QL1     | CD109     | ZFR2      | RP11-751H | FOXP2     | TTR       | GALNT5    | IGLV8-61  | CRLF1     |
| POU6F2    | HBB       | HOXB6     | IGHV4-39  | VAT1L     | ADCY8     | DEFB1     | PABPC1L2  | SNAP91    |
| CACNG6    | TMEM63C   | PPP2R2C   | ICAM5     | ENSG00000 | CDH12     | MT1G      | TPSAB1    | WFIKKN2   |
| DIO3      | F7        | LINC00475 | TACSTD2   | NEFM      | PKHD1     | VPREB3    | UPK3BL    | GAL3ST3   |
| IGLC7     | MFAP5     | ST8SIA5   | SULT4A1   | APOC1     | GULP1     | AQP12A    | PAMR1     | ACTN2     |
| CALN1     | FCRL5     | LRP2      | ELSPBP1   | PITX1     | NPSR1-AS1 | RP11-255B | RP11-260A | RXRG      |
| IRX3      | SPATC1L   | ST18      | ASIC1     | HS6ST3    | RP11-495P | ALDOB     | GRP       | CLEC3A    |
| SP8       | HLA-DRB5  | CXCL11    | ADCY5     | CYP11A1   | IGF2BP2   | SPOCK3    | GDNF-AS1  | DUOXA2    |
| KRT83     | CFTR      | AGAP2     | LEF1      | IGHV3-53  | PNMA3     | CDHR2     | LMX1B     | RAB3B     |
| AC099552  | MUC1      | OTX2      | IGSF9     | RAB3B     | HHIP      | EVX1      | TGFBR3L   | CLDN11    |
| SCEL      | PTGIS     | IP6K3     | AC108142  | SLC5A2    | MT1F      | CYP2B6    | AC022182  | TCERG1L   |
| COL10A1   | TRPM6     | RHOD      | RP11-734K | AC067959  | HOTTIP    | CLIC3     | DLL3      | PTGIS     |
| ONECUT2   | TMPRSS13  | GPD1      | MLPH      | IGDCC4    | UCHL1     | PVRL4     | TSPAN11   | ZIC4      |
| FUT3      | CTD-2192J | BHLHE22   | MT1L      | TNNT1     | GRID1     | TRIM15    | LRFN2     | FREM1     |
| A1BG      | RPL37AP8  | MGAT4C    | IGKV3-15  | CXCR2P1   | CSAG2     | FCRL2     | ABCC3     | CACNA1G   |
| IRX2      | GUCA2B    | IGKV2-24  | IGLV1-40  | GYG2      | DGCR5     | ENSG00000 | FGF12     | BHMT2     |
| SST       | ORM1      | SLC5A11   | GNGT1     | ARSF      | IGHV3-33  | HPN       | LGI1      | FBLN2     |
| HIST1H2AI | GABRB2    | WNT7B     | RIMS4     | ADCY2     | LAMC2     | FSTL5     | HCG4P5    | KCNJ3     |
| CAPN6     | TFAP2A    | SHANK2    | TRAV30    | HPCAL4    | PLEKHB1   | TMEM40    | EMX1      | EGFL6     |
| RDH16     | LRRN1     | SLC25A48  | KLK4      | UNC93A    | APOC3     | RP11-706C | LINGO2    | AC053503  |
| ITIH1     | IGHV4-55  | PLP1      | RP11-1267 | B3GNT3    | CELF5     | LINC00661 | FREM2     | IRS4      |
| IGF2BP3   | TNFSF9    | CLVS2     | STAC      | CLNK      | BCHE      | IGKV1-8   | RP4-555D2 | CBLN2     |
| OVOL1     | TBX10     | CYP4F3    | IGHV1-18  | IL1RL1    | NECAB2    | MYH7      | LRFN5     | ALDH1A2   |
| KCNJ3     | IL1B      | GSDMA     | ENSG00000 | IBSP      | SLC29A4   | PKP1      | GPM6A     | CDO1      |
| OGN       | IGFALS    | CTD-2316B | ENSG00000 | LRRC2     | TMEM82    | CABP7     | AP000783  | SYTL5     |
| PIGR      | ENSG00000 | ENSG00000 | FSTL4     | ENSG00000 | KRT80     | FCGR3B    | MFAP5     | AK5       |
| DPEP1     | TMEM236   | ZNF385B   | CACNA1I   | SLC16A12  | KIAA1244  | PRSS8     | LIF       | FLRT3     |
| SLCO1A2   | C2CD4B    | FUT9      | RP11-438D | LINC00460 | IFI27     | SFRP2     | DNAH11    | LINGO2    |
| CALB1     | PTGDR     | WDR16     | PDZK1IP1  | SMIM5     | ADH1A     | HS6ST3    | B3GALT5   | IGLV1-51  |
| CADM3     | ENSG00000 | LECT1     | TCEAL2    | TNNI1     | CCDC64B   | ENSG00000 | HTN3      | FSTL5     |
| DSG1      | RP11-93B1 | KCNH8     | AR        | GLP2R     | RP11-213H | AADAC     | MKRN3     | DRD1      |
| C6orf223  | LTK       | FGF5      | TRIM50    | RP11-424G | MT1A      | LEMD1     | RNA28S5   | GSG1L     |
| CLDN19    | SFTA2     | LRRTM4    | DPP6      | RP13-452N | KRT6A     | MMP11     | RORB      | IGLV8-61  |
| FCRL1     | DARC      | LBX1      | CACNA1D   | IGLV4-60  | ENSG00000 | FER1L4    | CPNE4     | CTD-2314G |
| IGKV1-16  | RP11-89K2 | PCDHA3    | CD5L      | C6        | NEBL      | IGHV1-3   | C8orf34   | RP11-844P |
| SCGB1D2   | RP11-161N | CYP4F29P  | SV2B      | RP11-697N | SSUH2     | KCNMB2    | FIBCD1    | MEG9      |
| FAM153B   | FBLN2     | PCDH11Y   | PCDHB5    | IRX2      | SAMD5     | G6PC      | IGFN1     | HOXC11    |
| BARX2     | ENSG00000 | KCND2     | VIPR2     | KCNK3     | TNFRSF19  | RP11-438N | CES5A     | CA12      |
| FST       | ITGBL1    | SUSD5     | RP11-20D1 | IGLV1-36  | ASPDH     | KCNK3     | DTX1      | RP11-867G |
| H19       | PRSS1     | IGHV3-74  | RP11-116C | WNT7B     | WNK4      | EDN3      | IGHV3-74  | MTND4P12  |
| CHGB      | SULT1B1   | TRIM29    | MAPK4     | C21orf62  | RPSAP53   | CCL17     | DMKN      | LAMA2     |
| SERPINA6  | MMP9      | OPCML     | HOXA11    | BCAS1     | GPR37     | UGT1A1    | IGKV2-24  | UBE2QL1   |
| ALDH8A1   | ST6GALNAc | KCNF1     | PAPPA2    | RP11-115N | MRAP2     | TMEM196   | C8orf47   | PRKAA2    |

|                 |                 |           |                 |                 |                 |                 |                     |
|-----------------|-----------------|-----------|-----------------|-----------------|-----------------|-----------------|---------------------|
| KLK1            | ENSG00000101959 | DARC      | EMID2           | SLC5A1          | INA             | LPHN3           | OMD                 |
| TMSB4Y          | AQP3            | SLC8A3    | RP11-958N       | PKHD1           | ITGB8           | ANXA13          | SIX3                |
| C6orf141        | UBD             | C1QL4     | MIOX            | GLYATL1         | CYP4A11         | RP11-326C       | AC002398. RP11-400N |
| PAH             | FER1L4          | MAL       | KRT80           | TFAP2C          | GLDN            | LGALS7          | ENSG00000101959     |
| RP11-357H       | GIF             | CDH22     | FOSB            | TENM3           | DMBT1           | SERPINA3        | IGHV3-53            |
| PRSS1           | KCNV1           | TKTL1     | AMTN            | KSR2            | MZB1            | ADH1C           | CA4                 |
| ADORA1          | DPT             | RASAL1    | RARRES2         | KLK7            | CEACAM6         | MTND4P2C        | VIPR2               |
| ENSG00000101959 | GPD1            | ENTPD2    | ZFP57           | RP11-798K       | PIK3C2G         | CLCA2           | RP11-178A           |
| UNC80           | IGHV3-66        | FMOD      | ENSG00000101959 | IGLV2-18        | CYP4A22         | IGHV4-28        | NR4A3               |
| SLC7A4          | SCAND3          | EVA1A     | SLC22A3         | GPC5            | CCDC162P        | TACSTD2         | IGLV4-69            |
| BANK1           | OLR1            | SLC10A4   | LINC00668       | SLC26A9         | ITIH5           | COX6B2          | IBSP                |
| PCDHA10         | FTLP3           | TREM1     | LGI3            | MAL2            | SLC5A12         | SYT5            | SYT16               |
| CTD-2008P       | HIST1H4C        | LINC00403 | SFN             | HOXB13          | VSIG1           | CYP2S1          | PDZK1               |
| PCDHB5          | AIFM3           | SLC7A14   | FABP4           | C1orf95         | RP11-219C       | SIGLEC14        | PCDHA6              |
| CA12            | GGT6            | PKP2      | NAT8L           | AOX1            | LHFPL4          | SLC6A17         | ABCG8               |
| RP11-525K       | PYY             | CLGN      | IGLL5           | KIF25-AS1       | AGXT            | VTCN1           | QRFPR               |
| SPDEF           | BST2            | C11orf9   | SYT4            | ATP2B2          | CLEC2L          | PROM2           | RNF43               |
| ENSG00000101959 | AHNAK2          | IGLV7-46  | RP11-152C       | IGKV3D-20       | PDIA2           | MUC3A           | TCEAL5              |
| CLRN3           | VANGL2          | KLK7      | DDIT4L          | OLFM4           | POPDC3          | SLC38A4         | ADAMTS19            |
| PADI1           | FOXA1           | AHNAK2    | AIF1L           | IGKV2D-29       | COL10A1         | IGKV6D-21       | COL28A1             |
| IGSF1           | HOXD10          | CREG2     | CTNNA2          | STK32A          | FAM99B          | TAGLN3          | IGDCC3              |
| IGHV3-66        | FAUP1           | CAMP      | RP11-495P       | FRMD7           | ZPLD1           | IGKV2D-40       | ENSG00000101959     |
| WNT10A          | CTD-2147F       | FAM196A   | LRP2            | SORCS1          | OXT             | RP11-526J       | WISP2               |
| MCOLN3          | NRXN3           | OLFM3     | IGHV1-46        | TUBB4A          | XAGE5           | IGLV5-37        | IGHV1-2             |
| ZPLD1           | THNSL2          | RGS22     | CTD-2247C       | LRRC15          | ILDR1           | CXCL14          | SEMA3B              |
| NRAP            | IGKV1-8         | INSM1     | IGLV3-1         | ANXA3           | ENSG00000101959 | C19orf33        | ENTPD3              |
| NEU4            | SSTR5           | KISS1R    | RP11-495P       | APOC3           | MYRIP           | CYMP            | FAM123A             |
| PF4V1           | EDN3            | HS3ST3A1  | SLC16A11        | PRSS22          | KCNJ4           | IGKV1-12        | IL1RAPL2            |
| CDHR2           | ZDHH8P1         | OSR1      | PCDHGA3         | MMP1            | AKR7A3          | AMTN            | FOLR1               |
| IGHV3-72        | IGLJ3           | FAM153B   | GALNT9          | IQSEC3          | RP11-114G       | BAAT            | CDH8                |
| C7              | SYT1            | PCDHB3    | KLB             | PTPRH           | PRAMEF4         | IGHV3-66        | APOC1               |
| YBX2            | RAB27B          | MKX       | MOXD1           | SLC38A5         | CHIT1           | SPIB            | EMILIN3             |
| AKR1C4          | SNORD17         | PCDHGA12  | ABCA8           | COL10A1         | RP11-757G       | HRASLS2         | AQP10               |
| SPTSSB          | SNHG14          | EGFR-AS1  | CWH43           | IGLV9-49        | C6orf132        | PLP1            | KIRREL2             |
| GJB6            | TENM3           | POU3F4    | SLC1A2          | PPP1R1B         | CUX2            | SPDEF           | OPRK1               |
| CRYAB           | RP11-269C       | CHST9     | CTB-1I21.1      | EFNA5           | PFN1P11         | CCL24           | DBH                 |
| SORCS1          | PHGDH           | SNAP25    | AC012499.       | MGAM            | CIDEC           | SFRP1           | FAM131C             |
| C5orf46         | J01415.6        | SRY       | TUBBP5          | BAAT            | GUCA2B          | ENSG00000101959 | RP11-299L           |
| HOXB8           | IGHV2-5         | OPRK1     | MYO1H           | ERVMER34        | SNAP25          | GABRA2          | RP11-863P           |
| RP11-438N       | GPC3            | IGKV1-6   | CTD-2554C       | ENSG00000101959 | SYT3            | POU6F2          | ARPP21              |
| MZB1            | SLC7A4          | FRMPD4    | C21orf33        | FOXJ1           | UPB1            | CD177           | SHH                 |
| WNT7B           | RPS19P1         | RP11-313J | IIHH            | ARPP21          | CYP19A1         | AC066593.       | FAM131B             |
| UROC1           | HOXA13          | ADAMDEC1  | COL9A2          | NOG             | GS1-179L1       | HLA-DQA2        | ACAN                |
| IGHV1-3         | ANXA13          | C1QL3     | GLOD5           | RP11-556I       | PRR15           | GATA4           | CDH23               |
| RP11-19E1       | SLC38A11        | DLX1      | C1QL1           | OXGR1           | ACSM2A          | AC131097.       | AC005062.           |
| AP1M2           | SFRP1           | RP11-809C | DCDC2           | TRPC2           | FAM178B         | ALDH1L1         | CTB-52I2.8          |
| ATP8A2          | PCDH19          | GLYATL2   | WISP2           | GLRB            | LRP1B           | SLC28A2         | PTPRR               |
|                 |                 |           |                 |                 |                 |                 | NLGN1               |

|           |                |                |                |                |                |                |           |           |
|-----------|----------------|----------------|----------------|----------------|----------------|----------------|-----------|-----------|
| CRIP3     | HCG4P5         | TOX3           | ANKRD22        | ACPP           | PRSS12         | DSC3           | DKK1      | EN2       |
| ABCB4     | TNC            | CYP1B1         | ENSG0000010151 | ISLR           | IGKV1-27       | VSTM2A         | RP11-586D | RP11-197K |
| ISX       | MLF1           | CYP27B1        | ENSG0000010151 | ENSG0000010151 | TTTY15         | SCG5           | SOX2      | CDKN2A    |
| RP11-93B1 | GBP5           | ZMAT4          | ENSG0000010151 | CLGN           | HMCN2          | C22orf42       | PRND      | CPXM2     |
| GCG       | BTNL3          | GPR1           | TMEM35         | CXCL1          | C1orf116       | MUC13          | LCN1      | TFAP2C    |
| UGT2A3    | PLN            | PTPRN          | CCDC68         | TFAP2A         | TMEM163        | BHLHA15        | LAMP5     | CFD       |
| APOC2     | DACT2          | COL25A1        | BIRC7          | CTSE           | UGT2B11        | GGT6           | DMRT2     | MAT1A     |
| RP11-707A | PGM5           | MMD2           | PCSK1          | PPP2R2C        | ADCY1          | PAX9           | IGLV1-51  | CLSTN2    |
| GDNF      | RP11-627G      | ZDHHC22        | SLC9A4         | CIDEC          | EFNA5          | SEZ6           | GABBR2    | AC079776. |
| C4BPB     | ENSG0000010151 | MEPE           | BARX2          | CYP4F11        | LHX3           | HOXA11-A       | STEAP4    | RP4-663N1 |
| LINC00261 | SULT1C2        | HPCAL4         | UGT2B28        | PTPRD          | SLC15A1        | GPA33          | RP11-124O | RIC3      |
| AGTR1     | RP11-400N      | C11orf87       | NALCN          | COL22A1        | MTND4P2C       | CHRD12         | RP11-531A | FERMT1    |
| OR2I1P    | GAD1           | ASIC2          | NEURL          | SLC2A5         | RBP1           | KLHDC7B        | MARCO     | SHANK2    |
| SPRR3     | ABCA3          | ENSG0000010151 | LYPD6B         | ATRNL1         | FCN2           | CPHL1P         | IGHV3-49  | SMPX      |
| TMC5      | HCAR2          | PDLIM4         | RGS8           | IGHV2-70       | PNMA5          | SPRR2A         | MFI2      | MGST1     |
| IDO1      | ENSG0000010151 | DLGAP1-A       | C12orf56       | HS3ST2         | ENSG0000010151 | TSPAN8         | SYNDIG1L  | FIBCD1    |
| RAB3B     | ALB            | CARTPT         | RP13-452N      | GAL3ST3        | PTPRD          | ANKRD1         | SLC44A5   | RP11-354E |
| NPIPL2    | ZNF43          | RP11-649A      | PYDC1          | VWA5B1         | FMO1           | PENK           | ANGPTL7   | MIR143HG  |
| FSTL4     | SYT13          | B3GAT2         | SPSB4          | TINAG          | AOX1           | TNNI2          | MUM1L1    | DUOXA1    |
| FRMPD1    | MRC1           | HOXC8          | FLG-AS1        | IRX1           | IGHV1-69       | TMSB4Y         | C11orf87  | IL13RA2   |
| RP11-1267 | CHGB           | RARRES2        | EPHA6          | KNDC1          | SLC39A4        | NR1H4          | MMRN1     | PKP2      |
| SPRR1A    | SPRR1B         | COL5A1         | TFPI2          | ANGPTL1        | G6PC           | AC078941.      | NRGN      | PPL       |
| AMN       | CTTNBP2        | CLDN11         | CTB-3601.      | NOL4           | DCAF8L2        | RXRG           | RP11-742N | GPR1      |
| CHEK2P2   | PRKCG          | PTX3           | RP11-146N      | LONRF2         | MARCO          | CDH10          | AC093375. | HOXA11    |
| KCNJ6     | FOXP2          | ADAMTSL1       | INSC           | HSPB7          | HULC           | LAMB3          | AMHR2     | PTGES3L   |
| GNG4      | REN            | KCTD4          | CLDN8          | PLA2G2A        | DUSP9          | CYP4F24P       | SFRP1     | RP4-792G4 |
| DMGDH     | CHRM2          | CAMK1G         | SLC22A10       | SOX11          | TRPV6          | NPY            | IGF2BP2   | PCDH11X   |
| NDNF      | CAPN13         | MIR7-3HG       | IGHV3-15       | ROR2           | KCNC2          | PRKCG          | CXCL2     | ENAM      |
| FMO3      | C1orf95        | RASEF          | GGT6           | FLRT3          | FAM201A        | RP11-259G      | AQP5      | CACNA1I   |
| IGLV7-46  | AC144521.      | NDN            | C1orf64        | RP11-411K      | DIRAS2         | PTX3           | IGF2      | C12orf54  |
| COMP      | RGL3           | SORCS1         | WTAPP1         | LRRRC19        | APCS           | RTL1           | RP11-1018 | SUSD5     |
| OIT3      | COL8A1         | HOPX           | SEC14L6        | FOXA1          | YBX2           | KLK12          | SCN7A     | CKMT2     |
| HMGA2     | AZGP1          | CNTNAP5        | MFSD6L         | ANKS4B         | UCA1           | FUT3           | RALYL     | KLHL30    |
| S100A14   | MLPH           | CLVS1          | THSD7B         | RP11-127I2     | SPOCK1         | GCNT3          | SLC35F3   | RIMS1     |
| CTD-2195N | RTN4RL1        | CCL2           | ART5           | TNFRSF9        | IGFBP1         | RELN           | KRT19     | APOD      |
| C2orf54   | EDA            | OSTN           | AP000472.      | PI16           | ITGBL1         | TRIM50         | MT1A      | XIRP2     |
| RELN      | PTPRU          | C20orf166      | HCG4P5         | EPHA10         | ENSG0000010151 | ENSG0000010151 | DRP2      | STK33     |
| IGLV1-36  | CD163          | CTD-2554C      | NUPR1L         | MCOLN3         | CDS1           | EPHA7          | TRIM55    | DUSP9     |
| CAPN13    | CECR2          | EPHA7          | CRYM           | PCOLCE2        | ZNF385D        | FOSB           | CAMKV     | PLCXD3    |
| RP11-678G | DMRT2          | CXCL10         | RTN4RL2        | ZNF385B        | ENSG0000010151 | SCG2           | LINC00645 | LINC00517 |
| FCN2      | MMP13          | RET            | DEFB132        | RP11-549B      | RP13-143G      | UPK3BL         | KNCN      | DLX5      |
| GABRG3    | RP11-413E      | TFAP2C         | TMEM45B        | KRT13          | TESC           | SLC4A10        | DPT       | ST6GAL2   |
| NPTX1     | MSR1           | EPHB1          | PRSS29P        | DNAJB13        | EPHA10         | IGHV3-7        | LRRRC10B  | C1QTNF7   |
| OR12D1P   | CLDN8          | PNMT           | TMEM174        | C1orf168       | AHNAK2         | TFPI2          | PKHD1     | EXTL1     |
| PRR15     | EYA1           | IGSF1          | RP11-469H      | RP11-60A8      | HAND2          | AMH            | RP4-792G4 | C14orf180 |
| RP3-324N1 | GPNMB          | ESPNL          | AC073218.      | DIRAS1         | EVC            | PDZK1IP1       | PDGFRA    | LINC00473 |
| TRPV6     | CPA3           | RP11-615I2     | MYRIP          | CTD-2195N      | SLC26A3        | ENSG0000010151 | SLCO5A1   | CALCA     |

|            |           |           |           |           |            |           |           |           |
|------------|-----------|-----------|-----------|-----------|------------|-----------|-----------|-----------|
| PLCXD3     | RASAL1    | HILS1     | RP11-991C | LRRN4CL   | ADORA2BP   | CSF3      | VDR       | F2RL2     |
| SLC15A1    | MASP1     | F5        | CHRD12    | RP11-325F | IGHV3-73   | GABRG2    | TSLP      | LY6K      |
| CYP4F2     | PRODH     | IGKV1-17  | SNTG1     | TRIM15    | MDGA2      | FAM135B   | NTSR1     | MYBPC2    |
| TBC1D27    | LY6D      | RP11-357K | IL6       | IGHV3-73  | UBXN10     | RUNDC3A   | POU6F2    | NCAM1     |
| TMEM27     | SIK1      | ESM1      | HCAR3     | IGF2BP1   | RP11-308B  | AC079466  | RNF212    | ZMAT4     |
| MYO7B      | CXCL17    | LCNL1     | CELF5     | CRABP1    | HOXC10     | TH        | AGTR1     | TNNT2     |
| IRX6       | TRNP1     | IGLV3-10  | C1orf233  | GALNT9    | PPP1R3G    | CTD-2547H | GALNT8    | GPR64     |
| SLC22A3    | FCGR3A    | C11orf88  | GRIK1     | CXorf22   | THBS2      | D86994.2  | HS3ST5    | NELL2     |
| PCDHA12    | CBFA2T3   | PCLO      | LINC00113 | IGLV3-27  | ACSM5      | CDHR5     | RP11-552E | NKX2-2    |
| TM4SF5     | GLT25D2   | RP11-298D | VAX2      | USH1C     | DPEP1      | IGF2BP1   | RP4-610C1 | FDCSP     |
| CYP2C9     | IGHV2-70  | TF        | ERBB4     | CKMT1B    | BCAS1      | GJB2      | CGNL1     | CACNA1B   |
| CLGN       | HLA-DRB6  | AC116614  | IL8       | GNGT1     | C19orf80   | UGT1A6    | LRRC15    | ENSG00000 |
| LYPD6B     | MYOM3     | SNX31     | VWA5B1    | PRELP     | PLA2G2D    | KCNJ3     | STMN2     | SCAND3    |
| HTR3A      | CCDC60    | KCNH5     | SLC19A3   | SCIN      | APCDD1     | C1orf106  | DSP       | AC145291  |
| IGLV4-60   | IGKV2-29  | LILRB5    | DRAXIN    | RP11-145M | CCNO       | BARX1     | POU3F2    | HRK       |
| IGLV7-43   | CPE       | CD300E    | OLIG1     | CRB2      | IGSF1      | C19orf59  | USP32P1   | PRRG3     |
| INHBC      | MIR143HG  | FLG       | PADI2     | CFTR      | GGT6       | FOLR1     | TMEM171   | PTGER3    |
| ELOVL2     | SPRR1A    | RP3-460G2 | CD22      | GABRB3    | PLCH2      | LRRC19    | TSPEAR    | CYP4F12   |
| AGT        | ENSG00000 | FOXJ1     | CTNND2    | PLA2G2D   | ACSL4      | ENSG00000 | HMX3      | POU3F3    |
| A1CF       | GAS6-AS1  | SH3GL3    | PTCHD2    | ARG2      | LYZ        | IGHE      | COL11A1   | PPARGC1A  |
| C8G        | CCL19     | GRM5      | TRPM3     | LAMC2     | HOXD-AS1   | UPK2      | RP11-89K2 | MYH8      |
| ASGR1      | TRIM29    | VAX1      | IGF2BP3   | RP11-386B | ENSG00000  | IGFL3     | WSCD2     | ELAVL3    |
| GLT25D2    | CHI3L1    | SPOCD1    | GPC4      | PCBP3     | ZCCHC16    | BIRC7     | PRSS50    | ADCYAP1   |
| ANKRD2     | MMP11     | COL14A1   | SLC34A2   | CALCR     | RXRG       | XPNPEP2   | IGLV3-10  | CLIC6     |
| ANGPTL1    | PI15      | CCDC108   | RP11-46C2 | SFTPB     | IGHV4-34   | RNA45S5   | SLITRK4   | NDST3     |
| CHRD11     | CSF3      | HS6ST3    | GPR98     | CDCA2     | LINC00659  | CALB2     | SPTSSB    | DPP10     |
| CLDN10-AS1 | INSM1     | MXRA5     | SIAH3     | CTC-575D1 | RP11-6181J | VNN1      | PCDHGC4   | LIPC      |
| IGHV3-64   | RPL13P12  | GABRE     | ABCG8     | WNK4      | KIAA1239   | CACNA1B   | RGS22     | RP11-766F |
| TNFRSF13B  | SULF1     | ANGPTL4   | RP11-413E | GABRD     | LAD1       | CTD-2008P | ENSG00000 | CTD-2335A |
| DHRS2      | ENSG00000 | TMEM246   | SPOCK1    | SLC4A3    | SYT7       | LYZ       | GJD2      | XK        |
| INHA       | CCDC80    | NEUROD6   | IGHV3-33  | KRT6A     | RP11-467L  | SERTM1    | SLC5A8    | SYT10     |
| SSTR5      | AXDND1    | KRBOX1    | SCUBE2    | CTD-2377D | LHX9       | ENSG00000 | RP11-2E17 | IGSF9B    |
| MEG3       | PALM3     | SLC6A11   | TMEM215   | RP11-119D | PAGE2B     | RP11-392O | ENSG00000 | TSPAN2    |
| LRRIQ1     | SLC3A1    | AC002454  | HNF1A-AS1 | AC021218  | RP11-70C1  | ALDH3B2   | MAL       | IGKV2-24  |
| NAT8       | PTPN13    | MYBPC1    | KALP      | TNNT2     | U91319.1   | HCG4P5    | GIPR      | LAMP5     |
| RP11-48O2  | C2CD4A    | SEC14L5   | MINOS1P3  | EYA1      | DDX53      | AGMO      | SKOR1     | RP11-14O2 |
| DIO3OS     | STC2      | IL20RA    | GPR87     | HSD11B2   | AL133445   | AXDND1    | DLK1      | FOXD3     |
| HSD17B2    | GREM2     | S100A9    | AC006159  | UGT1A6    | UGT2B7     | FCN1      | LYPD6     | DPYSL4    |
| C11orf53   | DNASE1L3  | IL1R2     | ROR2      | RP1-27K12 | GNAO1      | KCNQ2     | KCNG4     | TEX15     |
| TFAP2C     | TINAG     | FAM19A1   | GPR37     | PGF       | MYEOV      | IGKV2-30  | CXCL13    | KRT16     |
| AC066593   | ARHGAP4   | PPP1R17   | RAB27B    | UBD       | CABYR      | ACE2      | SAMD5     | ABCA6     |
| RP11-424G  | CPNE7     | VIT       | SYT17     | SIGLEC8   | DIO1       | RP11-706O | CYP27C1   | CDH22     |
| HOXC13     | PPP1R14C  | TMPRSS3   | AOX1      | HLA-G     | FBN3       | C12orf39  | GALNT14   | KCNJ4     |
| HTR1D      | HSPB7     | PLCXD3    | CDA       | D86994.2  | RP11-549B  | RALYL     | REG3G     | CXCL6     |
| ABCG5      | C10orf82  | BPIFB2    | RP11-404E | RP11-81H1 | GREM1      | CYP3A4    | LPPR3     | NOS1      |
| PLA2G4F    | NR0B2     | NAT16     | POSTN     | SCN2A     | PRAP1      | CLRN3     | MINOS1P3  | KLHDC8A   |
| CPNE4      | IL6       | ENSG00000 | GRID2     | TMEM252   | AC021218   | IGF1      | FAM19A5   | C10orf71  |

|           |           |           |           |           |            |           |            |           |
|-----------|-----------|-----------|-----------|-----------|------------|-----------|------------|-----------|
| PNMAL1    | XKR9      | IGHV1-2   | RP11-1042 | AC073115. | LYPD6B     | CTNND2    | OLR1       | IRF6      |
| ST6GALNA  | COL17A1   | ENSG00000 | APCDD1L   | TRPM3     | FEZF1-AS1  | VWA5B1    | NOX5       | FMO2      |
| EVX1      | RPS11P5   | RP3-340N1 | NTM       | FAXC      | CDH19      | PART1     | RP11-10B2  | PIANP     |
| SELE      | ADRA2A    | PCSK6     | MAFA      | THRSP     | PPP1R1B    | C21orf62  | PTN        | LRRN4CL   |
| ZIC4      | HLA-DQB1  | RSPO2     | ADAMTS9-  | VGLL1     | DPYS       | AZGP1     | NTRK3      | RP11-438N |
| TFCP2L1   | HOXB13    | RXRG      | RP11-855C | FUT9      | TRIM31     | C7        | RP4-610C1  | TOX3      |
| ADCY8     | LRRC19    | CLIC6     | SLPI      | RP11-219E | HLA-DQA2   | CRABP2    | ENSG00000  | ADAMTS9-  |
| TCL6      | GZMB      | FOXA1     | CTB-43E15 | GZMK      | PRSS22     | IGKV5-2   | RP11-8L2.1 | FOXE1     |
| PRSS29P   | TCP11     | NCAN      | AC009166. | C19orf80  | RP11-89K2  | VIL1      | C21orf33   | CTD-3049N |
| ARSI      | SERPINB2  | CDH15     | GATA3     | TMEM30B   | CLVS2      | MT1H      | GABRA3     | IGHV3-73  |
| FERMT1    | CALCA     | CNGA3     | GSDMC     | TMPRSS3   | EMX1       | CST2      | INSC       | HDC       |
| HOXC6     | C11orf9   | CACNG5    | AC019100. | KLRG2     | SFRP2      | STXBP5L   | PHACTR3    | TIMD4     |
| AFF2      | LGALS2    | NHLH2     | GPR39     | WFDC2     | CTSL2      | BMP5      | CAMK2A     | C11orf87  |
| AZGP1P1   | SYTL5     | PRSS35    | RP11-750B | NTRK2     | NLGN4X     | ST18      | KCNH7      | C1orf110  |
| PDX1      | RP11-4K3_ | PCDHB2    | MCIN      | TMEM27    | HSD17B6    | GNMT      | SYT2       | KCNG1     |
| IL8       | SCARA5    | AK5       | RP11-44F1 | AIF1L     | ENPP7      | TPSD1     | HS3ST4     | NTSR1     |
| IGLV5-45  | IGHV3-64  | FST       | LOXHD1    | SLC34A3   | FA2H       | RP11-420K | CLUL1      | MS4A2     |
| DPT       | ATP12A    | AKAP14    | AC010524. | PI15      | ANKRD1     | DLGAP1-AS | KCNJ4      | PRUNE2    |
| GREM2     | IGKV1D-8  | CACNG2    | FBXO40    | RP5-1172A | TMEM45B    | PRSS29P   | LRTM2      | PCBP3     |
| IGKV1-8   | ART3      | C4BPA     | PTH1R     | FDCSP     | RP11-1036  | CLDN3     | UNC5D      | GSTA1     |
| RP11-706O | TPSB2     | RP11-286B | RP11-44F1 | IGHV3-13  | KCNH2      | NTF4      | CPNE7      | ASPN      |
| VSX1      | ZNF334    | NDNF      | ENSG00000 | KLK4      | KCNF1      | SELE      | CREG2      | ASPA      |
| IL20RA    | FDCSP     | PDX1      | CA4       | RP11-124N | FAM155B    | MINOS1P3  | SOSTDC1    | FMO1      |
| PCSK1     | RP11-697N | RP1-177G6 | BHMT2     | CCDC146   | PAK3       | TNFRSF13C | MYOC       | RP11-863P |
| IGHV4-61  | DDX43     | GABBR2    | NCAM2     | MOXD1     | HRASLS2    | FCRL3     | GPR83      | RPSAP52   |
| TMEM130   | OCA2      | TMEM151   | SYT13     | SLCO1A2   | SPATA21    | PM20D1    | ESPNL      | NTN1      |
| MYO3B     | PHACTR3   | GABRG3    | CTA-929C8 | DPT       | SNTG1      | TNFRSF13B | LINC00599  | REEP1     |
| RAB3C     | FAM3D     | BCAN      | GLIS3     | LINC00675 | PDPN       | AC016708. | HOXC-AS2   | CACNG7    |
| ZNF536    | FADS2     | MMP19     | LRRC2     | SLC7A9    | SLC1A1     | HBA2      | AZGP1      | HS3ST2    |
| C19orf21  | SCARNA13  | COL1A2    | OVOL2     | WFDC5     | LONRF2     | HSD17B2   | RP11-84E2  | LRRC4B    |
| IGFBPL1   | RARRES1   | AC093726. | RP11-299H | SYT8      | SH3GL3     | RP11-776H | HOXB-AS3   | IDO1      |
| ENSG00000 | ENSG00000 | MLIP      | SERPINF2  | ADAMTS9-  | RP11-115J1 | DUSP26    | TSTD1      | WNT11     |
| CTD-2147F | CREB3L1   | FCGR2B    | HTR3A     | ACTC1     | AP000688.  | CHRM2     | ENSG00000  | LRRN3     |
| RP11-776H | RASD1     | SLC26A4-A | GRHL2     | AQP4      | SHBG       | WNT2      | DCN        | PAK3      |
| ACTBL2    | PLA2G2D   | TPSAB1    | CPLX1     | EPHA6     | NKAIN2     | NRXN1     | CCDC33     | MSLN      |
| MUC1      | AREG      | RP5-1121A | FAM181B   | RP11-219G | SMPX       | ABP1      | NPIPL2     | HEPH      |
| CNR1      | TMEM132   | LGR5      | RP11-380D | SYT7      | SHD        | BRS3      | ZIC3       | ATP2B2    |
| SCN9A     | EMX1      | IGHV4-34  | RP11-564C | DMKN      | ENSG00000  | RP3-417L2 | RP11-958N  | MMP7      |
| U91319.1  | KIF19     | RP11-844P | CCDC64B   | CGREF1    | VCAN       | LGR6      | AC016708.  | CXCR2P1   |
| ITIH5     | GPX1P1    | KRT16     | HOXA7     | NRAP      | HKDC1      | NSG2      | PCDHA11    | DUSP26    |
| BMPR1B    | NPR3      | ENSG00000 | ENSG00000 | SFN       | RP11-742N  | MAT1A     | RASGEF1C   | CDH8      |
| NROB2     | ZNF813    | ALDH1L1-A | VN1R85P   | GABRP     | GYG2P1     | CDK5R2    | AC009498.  | PTGFR     |
| TMEM171   | PF4       | FAM92B    | CLDN3     | IGLV5-45  | SLC22A10   | SLC17A6   | RAB37      | KIF26B    |
| ENAM      | CCL20     | ARHGDIG   | GSTA1     | MAB21L3   | TEX11      | CYP2W1    | RP11-286N  | MB        |
| RIC3      | DIO3      | LHX5      | SMTNL2    | RNU4-2    | CEACAM7    | UBD       | KCNK1      | KCND2     |
| DLX6-AS1  | DPP4      | BEND4     | CLGN      | CKMT1A    | GLYATL1    | MS4A8B    | THEM5      | CNKSR2    |
| IGHV4-28  | RP5-857K2 | ENSG00000 | ENSG00000 | RP11-396O | LINC00648  | BPIFB2    | ADRA2A     | SPESP1    |

|           |           |            |           |            |            |           |            |            |
|-----------|-----------|------------|-----------|------------|------------|-----------|------------|------------|
| CYP2A7    | GPR110    | CNTNAP2    | CAPN13    | CLEC18B    | SORCS2     | RETN      | SEMA3C     | CA4        |
| RP11-2231 | RPL39L    | AL009178   | BMP3      | CYP8B1     | HUNK       | OGDHL     | RP11-713C  | CTNNA2     |
| Metazoa_S | EPHB1     | IGF2BP2    | ENSG0000  | PSG4       | GPLD1      | TNNI3     | SLC35D3    | PPP1R14C   |
| RP11-372E | RNF182    | SPATA18    | COL4A6    | SCG2       | FTCD       | IL20RB    | BMP7       | PAPPA2     |
| IGKV2D-29 | GDF10     | COL9A3     | HLA-DQA2  | GMNC       | MSC        | CALN1     | HOXA10     | NDNF       |
| C5        | F10       | WFIKK2     | SLC8A1    | ABCC2      | TRPM8      | CYP26A1   | STK19P     | RIPK4      |
| LIN28A    | PLA2G2F   | COL10A1    | ENSG0000  | FAM153B    | ARNT2      | ZIC5      | RP11-706O  | CCKBR      |
| SFTA2     | ROBO2     | ERBB3      | C1DP1     | ELMOD1     | PI15       | PAX7      | USH1C      | CXCL5      |
| CDX2      | KCNMA1    | SPAG17     | AC009299  | RP11-674N  | AXIN2      | RP11-356M | IL1A       | C4B        |
| LYPD6     | SIX2      | TGM5       | RP11-109J | CRABP2     | BTNL3      | CLDN6     | RBP4       | COL19A1    |
| RP11-462L | HHLA2     | HOXA11-A   | ALDH1A1   | STMN2      | RSPO2      | RP11-59J5 | PLEK2      | YBX2       |
| PDZD3     | SLC26A9   | ARSF       | ACTC1     | CRHBP      | ABCG8      | SLC38A5   | TRHDE-AS1  | DLGAP1     |
| CTC-327F1 | MT1M      | PRKCG      | FOXF1-AS1 | TRIM29     | RHCG       | SLC6A20   | TMEM132E   | KIAA1549L  |
| HSD11B1   | SCARNA6   | HS3ST4     | AC118345  | MFAP5      | LINC00470  | USP32P1   | TFCP2L1    | PLAC9      |
| RP11-1220 | NINL      | HOXB-AS1   | PCDHGB4   | KCNH6      | HABP2      | RTBDN     | IL13RA2    | RXFP1      |
| SEMA3D    | TRPA1     | HCG22      | HOXA10    | IGHV4-61   | FABP4      | SYT16     | ENSG0000   | GABRA2     |
| IGSF11    | IL1RN     | ARSI       | FGF12     | DBC1       | ENSG0000   | TUBBP5    | KCTD8      | SEMA3A     |
| TMEM40    | C4orf48   | LRRC61     | SEMA3C    | ENSG0000   | CES1P1     | NRG3      | RP11-403I1 | PTPN20A    |
| GRP       | AP001065  | RP11-731J  | AQP4      | DHDH       | SSTR1      | DMBX1     | POU3F1     | KRT34      |
| PSAPL1    | LINC00654 | PCDHA2     | AC017048  | NPY6R      | ENSG0000   | ZG16B     | RP11-120I2 | BAI1       |
| FGF9      | SELENBP1  | CTHRC1     | RP13-439H | TREH       | UGT1A6     | LCT       | TOX        | GALNT9     |
| TENM3     | MT3       | TPBG       | RP11-745L | IGHV3-66   | KRT14      | GPC5-AS1  | FOXI2      | PYGM       |
| CNR2      | PCDHA4    | ATP2B3     | IGHV1-2   | GPR143     | LYPD1      | CDH19     | NTNG2      | VANGL2     |
| TRPA1     | FPR1      | HECW1      | BEND6     | UPB1       | CHRD1      | SAA2      | PRKCG      | ARSE       |
| TNR       | RNA28S5   | CCKBR      | FIBIN     | RP11-11L12 | ARL14      | ANPEP     | MOCOS      | NRG1       |
| PROZ      | ENSG0000  | CD5L       | SH3RF2    | SVOPL      | LDHC       | AC016745  | RTL1       | DLX3       |
| ARMC3     | RP11-568J | KLRK1      | ZNF728    | MYL3       | ALOX15B    | OLR1      | B3GALT1    | EBF2       |
| GALNT5    | TFPI2     | RASL11B    | EGFL6     | LRRN2      | LINC00511  | C5orf38   | MEOX2      | MAGEC2     |
| CXCL9     | CES3      | WNT2       | HOXC9     | PRODH      | FBXL16     | AMN       | HTR4       | RASL12     |
| ENSG0000  | FAM83A    | LRRIQ1     | NKAIN4    | LINC00494  | PLGLA      | SLC44A5   | C2CD4B     | ESYT3      |
| CXCL1     | HIST1H1D  | LINC00320  | F7        | ALDH1L1    | VEPH1      | C1QL1     | NEUROD2    | PIK3C2G    |
| TNFRSF11B | AC012501  | CCDC33     | CTD-2369P | FA2H       | DYDC2      | ENAM      | AFF2       | L1CAM      |
| RP11-30K9 | ST3GAL4   | GOLT1A     | USP32P1   | FCRL5      | AC010524   | IL6       | ADRA1D     | NDP        |
| ECHDC3    | BCAS1     | TMSB4Y     | MAPT      | USP32P1    | RP11-300J1 | UGT2B11   | TPD52L1    | FSTL4      |
| KCNH3     | ENSG0000  | RP11-1191  | RP11-846F | AC010084   | FHOD3      | POU2AF1   | NECAB2     | RP11-120J1 |
| BMP7      | MAOB      | TFCP2L1    | ENSG0000  | ENSG0000   | BMP7       | AC016683  | IL1RL1     | GALNT8     |
| ABCC8     | ANGPTL1   | KCNS1      | TGFA      | IGKV6-21   | PRKAA2     | AHNAK2    | WDR72      | BAI3       |
| C4BPA     | ADRA2C    | FAM225B    | HOXA6     | COL1A1     | RP11-150O  | ENSG0000  | KLK2       | PCSK9      |
| ABCB11    | RPL13P2   | RP11-107I1 | ADAMDEC   | BSPRY      | FAM110C    | RHOV      | CTC-378H2  | SLITRK4    |
| KCNH2     | CASQ2     | IGLV7-43   | DNASE1L3  | TMEM45B    | UBE2QL1    | NROB2     | DLGAP1     | GABRB2     |
| RNASE7    | SRPX2     | KIF25-AS1  | SERPINE1  | RP11-319F  | CRISP3     | MFAP5     | FSIP2      | RP11-16M8  |
| ADARB2    | MLK7-AS1  | HHIP       | MGAM      | TPSB2      | HOXB13     | IRX1      | CA10       | CHGB       |
| DIO2      | IHH       | KCNK1      | SLCO4C1   | NMRK2      | ANXA10     | SHH       | PPP1R1C    | RASL11B    |
| SLC9A2    | FLJ22184  | AC007682   | ADAMTS3   | C10orf126  | FUT6       | ZFY-AS1   | CST2       | AC093850   |
| LMX1B     | FAP       | RP11-439H  | PRLR      | RP11-496I  | SLC16A12   | ENSG0000  | SOCS3      | CLEC3B     |
| FAM81B    | QPCT      | APCDD1L-A  | AC004988  | ALDH1A2    | MNX1       | OR2I1P    | FGF11      | GPR37      |
| ENSG0000  | SNORA23   | HTR5A      | DSCAML1   | LA16c-329I | ANKRD35    | MTTP      | TMEM163    | RP11-399O  |

|           |                 |                 |                 |           |                 |                 |            |
|-----------|-----------------|-----------------|-----------------|-----------|-----------------|-----------------|------------|
| F12       | RNU5E-1         | ENSG00000101660 | IGKV1-8         | RP11-262H | ENSG00000101660 | ENSG00000101660 | P2RX1      |
| FLRT2     | RPL3P7          | PCDHGB3         | SPARCL1         | ALOX15B   | STEAP2          | MIR31HG         | RP11-745L  |
| CBLN2     | ENSG00000101660 | KRT17           | ACAN            | RP11-2E17 | FBXW10          | RP11-44F2       | C3         |
| COX6CP1   | COL1A1          | GRM7            | KCNK15          | RP11-314M | RP11-396O       | CCKBR           | ESM1       |
| TNFRSF13C | TREM1           | DTHD1           | TENM1           | TSPAN1    | ENHO            | C4BPB           | TNR        |
| SIX2      | ENSG00000101660 | AC140481        | IGHV4-59        | C5orf38   | CYP2D6          | PCP4            | EPCAM      |
| FCAMR     | NEU4            | GRIA4           | CHRNA3          | CXCL14    | DYNC1I1         | P2RX5           | RP11-142I2 |
| GABRA5    | SERPIND1        | SP9             | BAALC           | CHRNA4    | EMID2           | CXCL9           | GYG2P1     |
| OXTR      | IL11            | IGLON5          | RP11-389K       | IGHV3-72  | WNT7B           | MMP3            | RNA5SP11   |
| CNTN3     | OSM             | PRAME           | RP11-59N2       | TRPV6     | NTRK2           | ADH4            | FGFBP2     |
| CKMT1B    | KRT7            | DYDC2           | RP11-380I1      | THPO      | WDR72           | SLC14A1         | FMO2       |
| GDF2      | RP11-23P1       | AC092484        | STMN2           | CHI3L1    | FOLR1           | KCNN4           | ABTB2      |
| OGDHL     | HLA-DQB2        | AP000696        | ENSG00000101660 | ARHGAP40  | PNMAL1          | SCN7A           | MZB1       |
| CTD-3080P | IGHV3-20        | GATA6           | ENSG00000101660 | CES1      | SCARA5          | HAPLN1          | SLC2A12    |
| CRTAC1    | CCL13           | RP11-259G       | RP11-167H       | RNF212    | KLK4            | ENSG00000101660 | F12        |
|           |                 |                 |                 |           |                 |                 | CNTNAP3    |

## 10 cancer types

SKCM

TYRP1

KRT6A

RPS4Y1

KRT16

KRT14

KRT5

KRT6C

MAGEC2

KRT6B

DDX3Y

KRT1

MAGEA4

XIST

MAGEC1

KDM5D

PAEP

CTAG2

EDN3

SPRR1B

S100A7

PAGE5

NELL1

MAGEA6

TXLNG2P

OCA2

MAGEA12

EIF1AY

MAGEA3

MAGEA10

CALML5

KRT17

HHATL

PMEL

CALML3

MAGEA1

UTY

USP9Y

IGLV3-19

RP11-80F22.9

IGKV4-1

MAGEB2

ENSG00000270816

CASP14

CSAG1

CHST9

IGHV1-18  
TRPM1  
SFN  
GJB6  
IVL  
ALDH3B2  
ZFY  
KRTDAP  
SPRR2E  
IGHM  
IGLV2-14  
IGHG1  
TRIM29  
RP11-429E11.2  
DSG1  
VGF  
IGLV3-25  
IGKC  
ABCB5  
IGLV1-40  
DSC3  
DCT  
IGHV3-21  
MAPK4  
IGHV3-23  
DSG3  
IGLV3-21  
IGKV3-11  
LY6D  
IGLV3-10  
EYA1  
SPRR1A  
RP11-527H14.2  
IGHV1-2  
IGHG4  
IGKV3-20  
IGLV2-23  
PRKG2  
DSCR8  
IGHV5-51  
SPRR2A  
IGLL5  
PSPHP1  
IGKV1-5  
MAGEA11  
SERPINB5  
IGLV1-47

PI3  
SOSTDC1  
PRKY  
IGHV4-39  
CR2  
PMP2  
FABP7  
PKP1  
IGLV3-1  
IGLV6-57  
TTY15  
IGLV2-11  
ENSG00000280411  
SBSN  
CCL21  
SFRP1  
IGHG3  
IGHV3-15  
KRT13  
ENSG00000270550  
IGLC3  
IGLV1-44  
LRRTM4  
COL9A1  
IGLV4-69  
IGKV1-9  
KLK6  
MTRNR2L1  
IL13RA2  
MUC15  
IGHV4-59  
GATA4  
GABRA3  
LHFPL3-AS1  
KLK5  
IGKV3-15  
BAAT  
KLK7  
FDCSP  
IGHV3-73  
IGLC2  
IGHV1-24  
LINC00439  
IGHG2  
TFAP2B  
RP11-98L5.2  
IGKV1-17

SPRR2G  
IGHV3-11  
PRDM7  
HOXB13  
SPRR2D  
LRP2  
IGHV3-33  
OLIG2  
IGHGP  
ASB11  
RP11-369C8.1  
CMTM5  
CDH1  
IGLV8-61  
TF  
IGHV1-69  
IGKV1-16  
SERPINB3  
MMP13  
CSMD1  
ITIH6  
IGHV1-46  
IGKV1-27  
KRTAP19-1  
HAPLN1  
AC145110.1  
CNDP1  
IGHV3-74  
IGHV3-49  
ENSG00000278196  
RP4-718J7.4  
AC073236.3  
SSX1  
TYR  
BMP7  
PCSK2  
SOX1  
IGHA1  
SALL1  
FAM178B  
ANGPTL7  
FSTL5  
S100A7A  
RP11-399D6.2  
ZNF536  
IGHV3-48  
SCRG1

POU3F3  
GRIK3  
MLANA  
LINC00520  
IGKV1-6  
PLA2G2D  
LGALS7B  
ADCY2  
NRG3  
IGHD  
AC018730.1  
IGKV2-24  
NKX2-5  
GFRA3  
GPR143  
COL22A1  
COMP  
UGT2B7  
CTD-3049M7.1  
ENSG00000278910  
COL20A1  
IGHV1-58  
COL11A1  
IGJ  
S100A14  
NMRK2  
MRGPRX3  
COL17A1  
IGHV4-31  
SOX2  
SLC7A4  
KIF1A  
ENSG00000274576  
KRT4  
MS4A1  
RP11-738O11.13  
AC009499.1  
LCN2  
MUC7  
LOXL4  
CTD-2527I21.11  
OLIG1  
MAG  
MEGF10  
IGHV2-26  
FGFBP1  
CA8

PRIMA1  
CTCFL  
DPP10  
SLC38A8  
RP11-151D14.1  
IGKV2D-29  
LGI3  
IGHV3-53  
BCAN  
LINC00504  
NPTX2  
FAM69C  
CST1  
DSP  
MLIP  
FAM133A  
RP11-669N7.2  
CST2  
KRT15  
CPSF1P1  
KLK10  
ASB4  
INSC  
ENSG00000277586  
MMP8  
HORMAD1  
C7  
LOR  
RP11-63E9.1  
GJB2  
IGLV7-43  
CRTAC1  
IGLV3-9  
SLPI  
CXCL14  
SYTL5  
HOXC12  
IGLV1-51  
AC002511.1  
ANO4  
MZB1  
FLG2  
FMN2  
RP11-30J20.1  
PRSS21  
CHIT1  
TCN1

RP11-317N12.1  
IGKV2D-40  
SEMA3E  
CCL19  
KLK11  
SPRR3  
SPESP1  
BAGE2  
RXRG  
GAPDHS  
IGLC7  
IGLV9-49  
SLITRK6  
LIN28B  
NLGN4Y  
DPP6  
SERPINB4  
IGLV5-45  
LIN28A  
EVPL  
MPZ  
KRT75  
ADH1B  
UCN2  
HOXD13  
IGKV1-8  
RDH8  
IGLV3-27  
COL2A1  
MKRN9P  
CPN1  
RP11-59E19.4  
IGHV4-34  
FREM2  
DNAH9  
CSAG2  
HTN1  
DSG2  
LY6K  
PAGE2  
ROBO2  
RP4-765C7.2  
SERPINA5  
ENTHD1  
DNER  
GRIK2  
KPRP

PKLR  
IGHV2-5  
NCAM1  
LINC00668  
SLC5A4  
MAT1A  
S100A8  
NAA11  
TRIM63  
GDNF  
SERPINB13  
LCE3D  
PRSS33  
KLK8  
TDRD9  
SLC45A2  
PI16  
PSG4  
ABCA8  
FCRL5  
MAGEB1  
RP11-197K6.1  
IGHA2  
RP4-529N6.1  
EYA4  
IGF2BP1  
ZFP57  
TFPI2  
MIR205HG  
IGLV4-60  
RP11-1220K2.2  
CLDN1  
PKP3  
SFRP2  
PPP1R3C  
IGHV4-61  
CHRM1  
LINC00488  
MMP1  
RP11-366L20.2  
GABRG3  
DLK1  
MMP3  
IGLV1-36  
ARPP21  
FAM83C  
PDZK1IP1

IGKV6-21  
AC095067.1  
CLCA2  
FXVD3  
FAM83A  
GS1-179L18.1  
KRT78  
IP6K3  
MYH14  
RP11-886D15.1  
DMKN  
LINC00470  
FREM1  
IL36RN  
A2ML1  
C10orf99  
COL19A1  
ZIC1  
RAB25  
IGLV7-46  
RHCG  
ERVMER61-1  
LRRTM1  
KRT2  
BAALC  
IGHV2-70  
CNTFR  
DSC1  
MCHR1  
GRIA2  
ITIH5  
IGHV3-13  
MTND4P12  
SYNPR  
ENSG00000276775  
IGHV3-66  
AC012512.1  
OLFM3  
TMEM132D  
CHRD1  
IGHV3-72  
HPGD  
IGKV3D-20  
AP000688.8  
LGALS7  
PLA2G2A  
ZNF280A

SPINK5  
MME  
HMGA2  
FLRT3  
CD79A  
PAX5  
CXCL13  
RP11-449L23.2  
C1QTNF3  
TMEM163  
RP11-2E17.1  
PNLIPRP3  
RP11-103J17.2  
SHISA2  
AL035610.1  
ZNF560  
KIT  
RLBP1  
GABRB3  
RPSAP53  
C20orf26  
LRRC15  
SERPINB2  
PLA2G4E  
NCCRP1  
PLA2G4F  
LCE2A  
AGT  
LINC00355  
GABRG2  
MAL2  
CSAG3  
TRIM48  
SLC6A17  
TCL1A  
AKR1B10  
SFRP5  
IGHV4-28  
IGFL1  
PAPL  
NKX2-2  
CDH7  
KLK13  
RP11-114M1.2  
ITGA10  
SEC14L4  
TEX15

AC074389.9  
TUBA3C  
FAM19A5  
IGHV3-43  
AGMO  
RTN4RL1  
ATP6V0D2  
AC020907.1  
IGKV5-2  
EEF1A2  
BEX1  
LY6G6C  
IGKV2-30  
SCIN  
SERPINB7  
CRABP1  
MAL  
ST8SIA2  
HES2  
NEFM  
IGHV1-3  
EPHA5  
PASD1  
SCEL  
KIAA0125  
RNF128  
NR0B1  
SULT4A1  
PI15  
COL11A2  
WFDC1  
HS6ST2  
GABRA2  
GLB1L2  
WFDC5  
OR7A5  
CA14  
NTNG1  
NSG1  
ENSG00000279516  
KCNJ13  
HCN1  
CDKN2A  
CRCT1  
VAX1  
ENSG00000274956  
LINC00589

POU2AF1  
BIRC7  
LINC00648  
HLA-DQA2  
RP3-527G5.1  
ENSG00000275830  
PCDHGA12  
IGLV2-18  
FCER2  
PITX2  
LINC00681  
CD19  
MGST1  
AGXT2L1  
AC092165.4  
CTD-2380F24.1  
CLDN14  
RP11-46C20.1  
PLA1A  
FAM135B  
RP11-522D2.1  
PKHD1  
MMP16  
RELN  
COL4A5  
FAM163A  
CILP  
MMP12  
IRX2  
ENSG00000271579  
PPP1R14C  
SH3GL2  
RP11-230G5.2  
HOXB9  
CHL1  
GABRA5  
MKRN3  
ATP6V0A4  
C2orf54  
RP11-152P17.2  
GAP43  
SULT1C2  
CCNYL2  
ADIPOQ  
L1CAM  
FAM70A  
CXCL9

NTS  
WDR72  
RP11-488I20.9  
RP11-488I20.8  
CEACAM6  
CWH43  
CYTL1  
PPP2R2C  
GSTM1  
SLC16A6  
DNASE2B  
C5orf38  
ILDR2  
CD5L  
PRSS3  
CDH2  
ENSG00000278530  
RIMS2  
GDNF-AS1  
DKK1  
GSG1L  
SLC24A5  
CXCL5  
AZGP1  
FCRL1  
CDH3  
ANO3  
IGLV10-54  
TMPRSS13  
KCNS1  
SLC30A8  
RP11-3L21.2  
SLAMF9  
LCE1C  
MUCL1  
COBL  
GJB3  
TTY14  
ENSG00000275620  
SYT6  
XX-CR54.1  
IGKV1D-16  
ENSG00000272398  
MYOC  
PHKA1  
CERS3  
IGKV3D-15

FIBCD1  
TCERG1L  
GTSF1  
SERPINA3  
DAPL1  
MAOB  
DNAH2  
FERMT1  
IGHV3-20  
RP11-129K20.2  
IGHV6-1  
ANXA8  
KRT80  
SFRP4  
LMX1B  
RSPO4  
RP11-51M18.1  
MAEL  
VEPH1  
SEMA3A  
CA6  
RNF182  
RP11-706O15.3  
VIT  
TGM3  
PCSK1N  
TRPM8  
CADM3  
PRSS8  
MCOLN3  
SLURP1  
ANKRD30B  
KCNJ10  
AC013402.2  
TACSTD2  
PAGE1  
MGP  
RP11-244B22.2  
PLCH1-AS1  
RP11-1038A11.3  
TDRD12  
KRT23  
TNS4  
PTN  
PLCB4  
OR7C1  
OGDHL

BMPR1B  
ENSG00000273706  
IGHV3-64  
PPARGC1A  
DUOXA1  
TFF3  
SCUBE2  
TNFRSF17  
VAT1L  
ADRA2C  
SPRR2B  
IRX6  
CXCR2P1  
ANO5  
MT1A  
ST8SIA5  
ENSG00000278266  
ENSG00000270090  
PTGDS  
RP11-401O9.3  
ENSG00000273388  
MAP7D2  
AC104655.3  
CRNN  
HTR2C  
RP11-404F10.2  
LINC00189  
RP11-308B16.1  
RP11-107I14.1  
PRRT4  
BNC1  
RP11-94H18.1  
POF1B  
SDR16C5  
IL1RAPL1  
WNT7B  
ERVFRD-1  
IRX1  
RP11-400N13.3  
ELOVL2  
MORC1  
DDX43  
DMRTA1  
NALCN  
NEFH  
LDHC  
IGKV3D-11

IGHV4-55  
APOD  
ENSG00000276566  
IDO1  
TFAP2C  
CNTN6  
TMEM40  
AC010967.2  
TTYH1  
SDK2  
FABP4  
ISL1  
RNF175  
OR2I1P  
KRT19  
ENSG00000276399  
SLC26A4-AS1  
NIPAL4  
PCSK1  
TSPAN10  
ZNF750  
RP11-84E24.3  
RAMP1  
LMO3  
PDLIM4  
PLA2G4D  
LCE3E  
PRDM13  
PITX1  
RPH3A  
ZNF812  
AACSP1  
PTPRZ1  
IGHV3-7  
PCSK9  
PCLO  
WISP2  
SEMA3D  
TTC39A  
RP11-697M17.1  
SLCO1A2  
ABCC2  
MYBPC1  
ADAMDEC1  
WFDC12  
FAM83F  
IGHE

FEZF1-AS1  
HRASLS5  
AP001065.2  
TRIM58  
TNNT1  
MSI1  
BCHE  
TTR  
BPIFB1  
AC010145.3  
ANGPT1  
NPY6R  
CTNND2  
CST6  
RP11-366F6.2  
AQP5  
CEACAM5  
HIF3A  
IGKV1-12  
GAL  
AC011294.3  
TKTL1  
RP11-342C23.4  
CYP2J2  
IGHJ3  
UBD  
WNK2  
AC073218.2  
EREG  
ATP1B2  
IGKV1D-8  
AC004988.1  
PRKAA2  
LCE1A  
LPAR3  
IL22RA1  
DPEP3  
FCRL3  
SLC35F1  
HRASLS  
HTN3  
S100A2  
FLG  
HP  
DEFB1  
CKMT1B  
TUBB4A

CADPS  
CXorf48  
LRRC4B  
RP11-138J23.1  
SOX11  
MYEOV  
CBLC  
TTLL6  
CNTN4  
ANXA3  
CNTN1  
AC141928.1  
ZIC2  
MEOX2  
RP11-252C15.1  
CNTN3  
CTNNA2  
LONRF2  
TMEM171  
LINGO2  
NPY1R  
C10orf126  
PSAPL1  
RP11-276H19.4  
GFRA1  
RP11-424G14.1  
NPPC  
RP1-90G24.6  
CLDN11  
CNR1  
TRHDE  
RIMS4  
PTPN20A  
DSCR4  
SLC9A3  
MARCO  
KRT79  
FAM155B  
RP11-1070N10.5  
NKX6-1  
NR2E1  
HOXB-AS5  
ALB  
DLL3  
LBX1  
EPYC  
CXCL10

GPR27  
NAT16  
TRIM71  
GNGT1  
RP11-203P23.2  
GAL3ST1  
PCDHB5  
NGEF  
ENSG00000273259  
MYO5B  
SFTPC  
VCX3A  
NKX2-4  
TAGLN3  
IGKV1-39  
MUM1L1  
RP11-307C19.2  
LAD1  
F5  
ITGB8  
ALOX12B  
NTSR1  
GDF15  
REG3G  
SIK1  
SLC24A4  
AC005281.2  
IGKV2-29  
RP11-299H22.3  
CHI3L1  
S100A9  
SLC5A12  
C2orf70  
SORCS1  
SCN9A  
F2RL2  
CHAD  
IGLV1-41  
BANK1  
PNLDC1  
COL9A3  
PLEKHS1  
SCG3  
TMPRSS4  
SLC6A10P  
CTD-2081K17.1  
DHRS2

DCX  
FCRL2  
DLX6-AS1  
ART3  
SLC6A11  
DLGAP1  
NRXN1  
AC093787.1  
LGI4  
PRSS35  
GGT6  
RP11-371I1.2  
SLC6A14  
C21orf90  
SCML4  
DES  
SHISA3  
C1orf106  
GRHL2  
D86994.2  
ENSG00000280061  
RP5-884M6.1  
ENSG00000278630  
RP11-599J14.2  
CHRM3  
LRRN4CL  
SUSD5  
HAND2  
OVOL1  
BLK  
PPL  
SDR9C7  
AC244230.1  
GALNTL6  
RP11-267A15.1  
RP11-129M6.1  
PLAC2  
CXCL1  
TRIM51CP  
NKAIN4  
EHF  
DPYSL5  
RPTN  
RP11-574H6.1  
AC108142.1  
SNCB  
RP11-396O20.2

GZMK  
WNK4  
BBOX1  
RP1-90G24.10  
FCAMR  
KCNN2  
GAGE2A  
KCNQ5  
TPSB2  
CIDEA  
SAA1  
IGKV3-7  
UCHL1  
RP11-180C1.1  
AC018865.8  
B4GALNT4  
C6orf141  
LINC00326  
LRAT  
ZNF503-AS1  
BAI1  
FOXN1  
IRF6  
RP11-93B14.5  
FCRLA  
AIM2  
RAB3B  
FAM123A  
ENSG00000279184  
GALNT5  
CYSLTR2  
TMEM246  
S100A1  
AP001065.15  
CD8A  
AC066593.1  
HOXC13  
PROM2  
CTD-2314G24.2  
LAMC2  
CD8B  
LIF  
LCE1F  
KLHDC8A  
HS3ST5  
PPP1R1B  
AARD

RP3-523K23.2  
TNFRSF13B  
MAGEL2  
KCTD14  
LCE1B  
TSPAN8  
SLITRK5  
RP11-128P17.2  
OGN  
SOX8  
DMRT2  
LCE2B  
ATP1A2  
TMPRSS11D  
KLC3

Supplementary Table 2. Gene set enrichment analysis results of top 1,000 most variable genes used for

CHOL

Gene Set Name

GO\_HUMORAL\_IMMUNE\_RESPONSE  
GO\_COMPLEMENT\_ACTIVATION  
GO\_IMMUNOGLOBULIN\_COMPLEX  
GO\_HUMORAL\_IMMUNE\_RESPONSE\_MEDIATED\_BY\_CIRCULATING\_IMMUNOGLOBULIN  
GO\_B\_CELL\_MEDIATED\_IMMUNITY  
GO\_ANTIGEN\_BINDING  
GO\_REGULATION\_OF\_HUMORAL\_IMMUNE\_RESPONSE  
GO\_IMPORT\_INTO\_CELL  
GO\_SIGNALING\_RECEPTOR\_BINDING  
GO\_ADAPTIVE\_IMMUNE\_RESPONSE

COAD

Gene Set Name

GO\_IMMUNOGLOBULIN\_COMPLEX  
GO\_HUMORAL\_IMMUNE\_RESPONSE  
GO\_HUMORAL\_IMMUNE\_RESPONSE\_MEDIATED\_BY\_CIRCULATING\_IMMUNOGLOBULIN  
GO\_COMPLEMENT\_ACTIVATION  
GO\_ANTIGEN\_BINDING  
GO\_B\_CELL\_MEDIATED\_IMMUNITY  
GO\_SIGNALING\_RECEPTOR\_BINDING  
GO\_IMMUNOGLOBULIN\_COMPLEX\_CIRCULATING  
GO\_REGULATION\_OF\_IMMUNE\_SYSTEM\_PROCESS  
GO\_ADAPTIVE\_IMMUNE\_RESPONSE

GBM

Gene Set Name

GO\_CELL\_CELL\_SIGNALING  
GO\_NEUROGENESIS  
GO\_CENTRAL\_NERVOUS\_SYSTEM\_DEVELOPMENT  
GO\_INTRINSIC\_COMPONENT\_OF\_PLASMA\_MEMBRANE  
GO\_SYNAPSE  
GO\_IMMUNOGLOBULIN\_COMPLEX  
GO\_HUMORAL\_IMMUNE\_RESPONSE  
GO\_NEURON\_DIFFERENTIATION  
GO\_SYNAPTIC\_SIGNALING  
GO\_EXTRACELLULAR\_MATRIX

KICH

Gene Set Name

GO\_INTRINSIC\_COMPONENT\_OF\_PLASMA\_MEMBRANE  
GO\_ION\_TRANSPORT  
GO\_PLASMA\_MEMBRANE\_REGION  
GO\_SYNAPSE  
GO\_NEURON\_DIFFERENTIATION

GO\_CELL\_CELL\_SIGNALING  
GO\_CELL\_SURFACE  
GO\_NEUROGENESIS  
GO\_IMPORT\_INTO\_CELL  
GO\_SIGNALING\_RECEPTOR\_BINDING

#### KIRP

Gene Set Name

GO\_IMMUNOGLOBULIN\_COMPLEX  
GO\_HUMORAL\_IMMUNE\_RESPONSE\_MEDIATED\_BY\_CIRCULATING\_IMMUNOGLOBULIN  
GO\_COMPLEMENT\_ACTIVATION  
GO\_HUMORAL\_IMMUNE\_RESPONSE  
GO\_ANTIGEN\_BINDING  
GO\_B\_CELL\_MEDIATED\_IMMUNITY  
GO\_IMPORT\_INTO\_CELL  
GO\_REGULATION\_OF\_HUMORAL\_IMMUNE\_RESPONSE  
GO\_ADAPTIVE\_IMMUNE\_RESPONSE  
GO\_ADAPTIVE\_IMMUNE\_RESPONSE\_BASED\_ON\_SOMATIC\_RECOMBINATION\_OF\_IMMUNE\_RECEPTO

#### LIHC

Gene Set Name

GO\_HUMORAL\_IMMUNE\_RESPONSE  
GO\_IMPORT\_INTO\_CELL  
GO\_COMPLEMENT\_ACTIVATION  
GO\_HUMORAL\_IMMUNE\_RESPONSE\_MEDIATED\_BY\_CIRCULATING\_IMMUNOGLOBULIN  
GO\_IMMUNOGLOBULIN\_COMPLEX  
GO\_ENDOCYTOSIS  
GO\_ANTIGEN\_BINDING  
GO\_B\_CELL\_MEDIATED\_IMMUNITY  
GO\_SIGNALING\_RECEPTOR\_BINDING  
GO\_SMALL\_MOLECULE\_METABOLIC\_PROCESS

#### PAAD

Gene Set Name

GO\_IMMUNOGLOBULIN\_COMPLEX  
GO\_HUMORAL\_IMMUNE\_RESPONSE  
GO\_HUMORAL\_IMMUNE\_RESPONSE\_MEDIATED\_BY\_CIRCULATING\_IMMUNOGLOBULIN  
GO\_COMPLEMENT\_ACTIVATION  
GO\_B\_CELL\_MEDIATED\_IMMUNITY  
GO\_ANTIGEN\_BINDING  
GO\_ADAPTIVE\_IMMUNE\_RESPONSE  
GO\_SIGNALING\_RECEPTOR\_BINDING  
GO\_IMMUNOGLOBULIN\_COMPLEX\_CIRCULATING  
GO\_LYMPHOCYTE\_MEDIATED\_IMMUNITY

#### PCPG

Gene Set Name

GO\_CELL\_CELL\_SIGNALING  
GO\_SYNAPSE  
GO\_INTRINSIC\_COMPONENT\_OF\_PLASMA\_MEMBRANE  
GO\_SIGNALING\_RECEPTOR\_BINDING  
GO\_NEUROGENESIS  
GO\_SYNAPTIC\_SIGNALING  
GO\_NEURON\_DIFFERENTIATION  
GO\_NEURON\_PROJECTION  
GO\_IMMUNOGLOBULIN\_COMPLEX  
GO\_SYNAPTIC\_MEMBRANE

SARC

Gene Set Name

GO\_NEURON\_DIFFERENTIATION  
GO\_NEUROGENESIS  
GO\_IMMUNOGLOBULIN\_COMPLEX  
GO\_CELL\_CELL\_SIGNALING  
GO\_ANIMAL\_ORGAN\_MORPHOGENESIS  
GO\_SIGNALING\_RECEPTOR\_BINDING  
GO\_EXTRACELLULAR\_MATRIX  
GO\_HUMORAL\_IMMUNE\_RESPONSE\_MEDIATED\_BY\_CIRCULATING\_IMMUNOGLOBULIN  
GO\_COMPLEMENT\_ACTIVATION  
GO\_LOCOMOTION

SKCM

Gene Set Name

GO\_IMMUNOGLOBULIN\_COMPLEX  
GO\_HUMORAL\_IMMUNE\_RESPONSE  
GO\_HUMORAL\_IMMUNE\_RESPONSE\_MEDIATED\_BY\_CIRCULATING\_IMMUNOGLOBULIN  
GO\_COMPLEMENT\_ACTIVATION  
GO\_ANTIGEN\_BINDING  
GO\_B\_CELL\_MEDIATED\_IMMUNITY  
GO\_IMMUNOGLOBULIN\_COMPLEX\_CIRCULATING  
GO\_IMMUNOGLOBULIN\_RECEPTOR\_BINDING  
GO\_ADAPTIVE\_IMMUNE\_RESPONSE  
GO\_PHAGOCYTOSIS\_RECOGNITION

unsupervised hierarchical clustering in 10 cancer types

---

| Number of Genes in Gene Set (K) | Number of Genes in Overlap (k) | p-value   | FDR q-value |
|---------------------------------|--------------------------------|-----------|-------------|
| 352                             | 121                            | 1.83E-105 | 1.87E-101   |
| 170                             | 87                             | 2.20E-94  | 1.12E-90    |
| 144                             | 81                             | 1.73E-92  | 5.89E-89    |
| 147                             | 80                             | 9.92E-90  | 2.53E-86    |
| 219                             | 81                             | 1.80E-73  | 3.67E-70    |
| 155                             | 68                             | 6.53E-68  | 1.11E-64    |
| 133                             | 64                             | 2.95E-67  | 4.29E-64    |
| 810                             | 126                            | 2.21E-64  | 2.82E-61    |
| 1611                            | 170                            | 1.33E-61  | 1.50E-58    |
| 663                             | 112                            | 5.68E-61  | 5.79E-58    |

| Number of Genes in Gene Set (K) | Number of Genes in Overlap (k) | p-value   | FDR q-value |
|---------------------------------|--------------------------------|-----------|-------------|
| 144                             | 89                             | 7.07E-107 | 7.20E-103   |
| 352                             | 108                            | 8.12E-88  | 4.14E-84    |
| 147                             | 74                             | 1.59E-79  | 5.40E-76    |
| 170                             | 75                             | 5.25E-75  | 1.34E-71    |
| 155                             | 69                             | 2.18E-69  | 4.44E-66    |
| 219                             | 75                             | 4.73E-65  | 8.04E-62    |
| 1611                            | 168                            | 5.87E-60  | 8.55E-57    |
| 69                              | 47                             | 7.99E-60  | 1.02E-56    |
| 1670                            | 169                            | 1.90E-58  | 2.15E-55    |
| 663                             | 108                            | 4.90E-57  | 5.00E-54    |

| Number of Genes in Gene Set (K) | Number of Genes in Overlap (k) | p-value  | FDR q-value |
|---------------------------------|--------------------------------|----------|-------------|
| 1665                            | 175                            | 1.79E-63 | 1.82E-59    |
| 1625                            | 162                            | 2.35E-55 | 1.20E-51    |
| 995                             | 124                            | 1.80E-52 | 6.12E-49    |
| 1744                            | 162                            | 3.43E-51 | 8.73E-48    |
| 1332                            | 139                            | 1.44E-49 | 2.93E-46    |
| 144                             | 53                             | 2.86E-48 | 4.87E-45    |
| 352                             | 74                             | 2.14E-47 | 3.11E-44    |
| 1365                            | 134                            | 9.82E-45 | 1.25E-41    |
| 733                             | 98                             | 4.28E-44 | 4.85E-41    |
| 531                             | 83                             | 1.29E-42 | 1.20E-39    |

| Number of Genes in Gene Set (K) | Number of Genes in Overlap (k) | p-value  | FDR q-value |
|---------------------------------|--------------------------------|----------|-------------|
| 1744                            | 149                            | 8.75E-47 | 8.92E-43    |
| 1692                            | 125                            | 9.28E-33 | 4.73E-29    |
| 1190                            | 103                            | 1.41E-32 | 4.81E-29    |
| 1332                            | 108                            | 1.09E-31 | 2.78E-28    |
| 1365                            | 108                            | 8.90E-31 | 1.81E-27    |

|      |     |          |          |
|------|-----|----------|----------|
| 1665 | 120 | 1.93E-30 | 3.28E-27 |
| 902  | 86  | 3.12E-30 | 4.07E-27 |
| 1625 | 118 | 3.20E-30 | 4.07E-27 |
| 810  | 81  | 6.38E-30 | 7.22E-27 |
| 1611 | 113 | 1.21E-27 | 1.23E-24 |

| Number of Genes in Gene Set (K) | Number of Genes in Overlap (k) | p-value  | FDR q-value |
|---------------------------------|--------------------------------|----------|-------------|
| 144                             | 80                             | 1.11E-91 | 1.13E-87    |
| 147                             | 67                             | 4.13E-69 | 2.11E-65    |
| 170                             | 69                             | 8.36E-67 | 2.84E-63    |
| 352                             | 90                             | 2.00E-66 | 5.10E-63    |
| 155                             | 64                             | 1.35E-62 | 2.75E-59    |
| 219                             | 69                             | 6.87E-58 | 1.17E-54    |
| 810                             | 111                            | 4.46E-52 | 6.49E-49    |
| 133                             | 53                             | 5.46E-51 | 6.96E-48    |
| 663                             | 100                            | 9.05E-51 | 1.02E-47    |
| 352                             | 75                             | 3.40E-49 | 3.46E-46    |

| Number of Genes in Gene Set (K) | Number of Genes in Overlap (k) | p-value  | FDR q-value |
|---------------------------------|--------------------------------|----------|-------------|
| 352                             | 84                             | 3.55E-59 | 3.62E-55    |
| 810                             | 114                            | 1.61E-54 | 8.20E-51    |
| 170                             | 60                             | 1.02E-53 | 3.46E-50    |
| 147                             | 56                             | 2.16E-52 | 5.50E-49    |
| 144                             | 55                             | 1.51E-51 | 3.07E-48    |
| 661                             | 92                             | 1.50E-43 | 2.54E-40    |
| 155                             | 50                             | 1.10E-42 | 1.49E-39    |
| 219                             | 57                             | 1.17E-42 | 1.49E-39    |
| 1611                            | 137                            | 1.07E-39 | 1.21E-36    |
| 1962                            | 152                            | 2.48E-39 | 2.52E-36    |

| Number of Genes in Gene Set (K) | Number of Genes in Overlap (k) | p-value   | FDR q-value |
|---------------------------------|--------------------------------|-----------|-------------|
| 144                             | 97                             | 4.26E-122 | 4.34E-118   |
| 352                             | 121                            | 3.14E-105 | 1.60E-101   |
| 147                             | 83                             | 8.41E-95  | 2.86E-91    |
| 170                             | 83                             | 1.28E-87  | 3.27E-84    |
| 219                             | 85                             | 4.68E-79  | 9.54E-76    |
| 155                             | 72                             | 5.15E-74  | 8.75E-71    |
| 663                             | 122                            | 1.04E-70  | 1.51E-67    |
| 1611                            | 179                            | 3.11E-68  | 3.96E-65    |
| 69                              | 50                             | 8.85E-66  | 1.00E-62    |
| 351                             | 90                             | 2.32E-65  | 2.36E-62    |

| Number of Genes in Gene Set (K) | Number of Genes in Overlap (k) | p-value | FDR q-value |
|---------------------------------|--------------------------------|---------|-------------|
|---------------------------------|--------------------------------|---------|-------------|

|      |     |          |          |
|------|-----|----------|----------|
| 1665 | 197 | 8.02E-82 | 8.18E-78 |
| 1332 | 173 | 1.21E-77 | 6.19E-74 |
| 1744 | 187 | 2.56E-70 | 8.71E-67 |
| 1611 | 163 | 2.74E-57 | 6.99E-54 |
| 1625 | 162 | 4.94E-56 | 8.49E-53 |
| 733  | 111 | 5.00E-56 | 8.49E-53 |
| 1365 | 147 | 7.27E-55 | 1.06E-51 |
| 1317 | 140 | 1.74E-51 | 2.21E-48 |
| 144  | 54  | 6.18E-50 | 7.00E-47 |
| 438  | 82  | 1.08E-48 | 1.10E-45 |

| Number of Genes in Gene Set (K) | Number of Genes in Overlap (k) | p-value  | FDR q-value |
|---------------------------------|--------------------------------|----------|-------------|
| 1365                            | 154                            | 9.05E-58 | 4.45E-54    |
| 1625                            | 168                            | 9.29E-58 | 4.45E-54    |
| 144                             | 60                             | 1.31E-57 | 4.45E-54    |
| 1665                            | 168                            | 2.96E-56 | 7.53E-53    |
| 1071                            | 134                            | 2.32E-55 | 4.72E-52    |
| 1611                            | 161                            | 3.03E-53 | 5.15E-50    |
| 531                             | 94                             | 6.42E-52 | 9.35E-49    |
| 147                             | 54                             | 2.19E-48 | 2.79E-45    |
| 170                             | 56                             | 4.53E-47 | 4.77E-44    |
| 1984                            | 170                            | 4.68E-47 | 4.77E-44    |

| Number of Genes in Gene Set (K) | Number of Genes in Overlap (k) | p-value   | FDR q-value |
|---------------------------------|--------------------------------|-----------|-------------|
| 144                             | 101                            | 1.17E-131 | 1.19E-127   |
| 352                             | 113                            | 4.95E-96  | 2.52E-92    |
| 147                             | 81                             | 1.54E-92  | 5.22E-89    |
| 170                             | 84                             | 1.58E-90  | 4.02E-87    |
| 155                             | 76                             | 1.39E-81  | 2.83E-78    |
| 219                             | 83                             | 2.06E-77  | 3.51E-74    |
| 69                              | 52                             | 1.01E-70  | 1.47E-67    |
| 73                              | 51                             | 1.77E-66  | 2.26E-63    |
| 663                             | 115                            | 2.51E-65  | 2.84E-62    |
| 81                              | 52                             | 1.06E-64  | 1.08E-61    |

Supplementary Table 3. Significantly amplified and deleted loci across 7 cancer types

| COAD      |          |           |          | GBM       |          |           |          |           |
|-----------|----------|-----------|----------|-----------|----------|-----------|----------|-----------|
| Subtype A |          | Subtype B |          | Subtype A |          | Subtype B |          | Subtype C |
| Amp       | Del      | Amp       | Del      | Amp       | Del      | Amp       | Del      | Amp       |
| 17q12     | 16p13.3  | 17q12     | 16p13.3  | 12q14.1   | 9p21.3   | 7p11.2    | 9p21.3   | 7q31.2    |
| 13q12.2   | 6q26     | 8p11.21   | 16q23.1  | 4q12      | 1p32.3   | 4q12      | 10q23.31 | 2q32.1    |
| 8q24.21   | 4q22.1   | 8q24.21   | 20p12.1  | 7p11.2    | 12q14.1  | 12q14.1   | 1p36.23  | 10p14     |
| 11p15.5   | 20p12.1  | 12p13.32  | 1p33     | 1q32.1    | 6q26     | 1q32.1    | 6q27     |           |
| 20q11.21  | 3p14.2   | 13q12.13  | 1p36.11  | 6p21.1    | 15q14    | 7q21.2    | 14q13.1  |           |
| 8p11.21   | 16q23.1  | 20q13.12  | 3p14.2   | 6q21      | 10q23.31 | 12p13.32  | 3q29     |           |
| 12p13.32  | 1p33     | 11p15.5   | 5q12.1   | 12p13.32  | 13q14.2  | 12q15     | 10q26.3  |           |
| 20q13.12  | 5q12.1   | 20p11.21  | 4q35.1   |           | 17p13.1  | 1p36.21   | 1p32.3   |           |
| 6p21.1    | 5q22.2   | 19q13.12  | 10q23.31 |           | 4q31.23  | 3q26.33   | 22q13.31 |           |
| 19q13.11  | 6p25.3   | 18q11.2   | 6q26     |           | 1p36.31  | 2p24.3    | 13q14.2  |           |
| 13q22.1   | 1p36.11  | 13q22.1   | 4q22.1   |           | 10q26.3  | 4p16.3    | 4q34.3   |           |
| 8p11.23   | 18q21.2  | 5p13.1    | 18q21.2  |           | 10q21.1  |           | 16q24.2  |           |
| 12p11.22  | 4q34.3   | 16q12.1   | 15q21.1  |           | 15q21.3  |           | 1q44     |           |
| 8p11.23   | 3q26.31  | 6p21.1    | 6p25.3   |           | 14q13.1  |           | 13q21.2  |           |
| 17p11.2   | 10q21.1  | 20p12.2   | 5q21.2   |           | 16q23.1  |           | 15q15.1  |           |
| 20p11.21  | 10q23.31 | 17q23.3   | 21q11.2  |           | 11p15.4  |           | 6p24.1   |           |
| 20p12.1   | 18q12.2  | 7p11.2    | 18q12.3  |           | 14q32.2  |           | 10p15.3  |           |
| 1p33      | 15q12    |           | 8p23.1   |           |          |           | 19q13.41 |           |
| 20p13     | 22q13.32 |           | 3q26.31  |           |          |           | 11p15.5  |           |
| 8q21.13   | 17p12    |           | 17p12    |           |          |           | 2q37.2   |           |
|           | 15q22.33 |           | 1p31.1   |           |          |           | 10p13    |           |
|           | 8p22     |           | 22q13.32 |           |          |           | 5q13.1   |           |
|           | 8p23.2   |           | 15q11.2  |           |          |           | 5q34     |           |
|           | 8q11.1   |           | 2q22.3   |           |          |           | 17q11.2  |           |
|           | 7q31.1   |           | 2p21     |           |          |           |          |           |
|           | 10q25.2  |           | 17q24.3  |           |          |           |          |           |
|           | 19p13.3  |           | 9p21.3   |           |          |           |          |           |
|           | 21q21.1  |           | 10q21.1  |           |          |           |          |           |
|           | 15q15.2  |           | 2q37.1   |           |          |           |          |           |
|           | 13q14.13 |           |          |           |          |           |          |           |
|           | 4p16.3   |           |          |           |          |           |          |           |
|           | 17q24.3  |           |          |           |          |           |          |           |
|           | 2q22.1   |           |          |           |          |           |          |           |
|           | 1q42.2   |           |          |           |          |           |          |           |



| KIRP     |           |          | PAAD      |     |           |          | PC        |          |
|----------|-----------|----------|-----------|-----|-----------|----------|-----------|----------|
| Type A   | Subtype B |          | Subtype A |     | Subtype B |          | Subtype A |          |
| Del      | Amp       | Del      | Amp       | Del | Amp       | Del      | Amp       | Del      |
| 1p36.32  |           | 9p21.3   |           |     | 18q11.2   | 9p21.3   | 4q31.1    | 17q11.2  |
| 4q34.3   |           | 2q37.2   |           |     | 8q24.21   | 18q21.2  | 17q21.31  | 1p12     |
| 11q22.3  |           | 1p36.22  |           |     | 19q13.2   | 1p36.11  | 1q21.3    | 22q13.32 |
| 16q24.1  |           | 11q22.3  |           |     | 9p13.3    | 17q22    |           | 3p24.1   |
| 9p21.3   |           | 14q32.33 |           |     | 7q22.1    | 17p12    |           | 1p36.32  |
| 2q36.3   |           | 2q22.1   |           |     | 1p12      | 5q14.2   |           | 3q26.31  |
| 19p13.3  |           | 5q15     |           |     | 17q12     | 22q13.32 |           | 11p15.4  |
| 22q13.32 |           | 3p14.2   |           |     | 12q15     | 6p25.3   |           | 4q35.2   |
| 6p12.3   |           | 6q27     |           |     | 12p12.1   | 22q13.31 |           | 17p13.1  |
| 14q11.2  |           | 15q21.1  |           |     | 8p11.23   | 12q24.32 |           | 9p23     |
| 2q22.1   |           | 4q31.23  |           |     | 17p11.2   | 14q11.2  |           | 6q16.1   |
| 10q21.1  |           | 8p23.1   |           |     | 4p16.3    | 7q36.1   |           | 5q35.2   |
| 21q22.3  |           |          |           |     | 6p21.31   | 4q35.1   |           | 4q22.1   |
|          |           |          |           |     | 20p11.23  | 19p13.3  |           | 16q21    |
|          |           |          |           |     | 8p11.21   | 19p13.2  |           | 1q44     |
|          |           |          |           |     | 12p13.33  | 11p15.4  |           | 3q13.11  |
|          |           |          |           |     | 3q26.2    | 16q23.1  |           | 17q21.31 |
|          |           |          |           |     | 2q36.2    | 15q14    |           |          |
|          |           |          |           |     |           | 10p15.3  |           |          |
|          |           |          |           |     |           | 19q13.33 |           |          |
|          |           |          |           |     |           | 21q11.2  |           |          |
|          |           |          |           |     |           | 1p36.32  |           |          |
|          |           |          |           |     |           | 13q14.2  |           |          |
|          |           |          |           |     |           | 6q26     |           |          |
|          |           |          |           |     |           | 10q23.31 |           |          |
|          |           |          |           |     |           | 2q37.3   |           |          |
|          |           |          |           |     |           | 9q22.33  |           |          |



| PG        |     | SARC      |         |           |          | SKCM      |          |         |
|-----------|-----|-----------|---------|-----------|----------|-----------|----------|---------|
| Subtype B |     | Subtype A |         | Subtype B |          | Subtype A |          | Subt    |
| Amp       | Del | Amp       | Del     | Amp       | Del      | Amp       | Del      | Amp     |
|           |     | 12q15     | 9p21.3  | 12q15     | 13q14.2  | 1p12      | 9p21.3   | 3p13    |
|           |     | 1q24.3    | 4q34.3  | 1q24.3    | 2q37.3   | 11q14.1   | 10q23.31 | 11q13.3 |
|           |     | 5p15.33   | 17q11.2 | 3p12.1    | 9p21.3   |           | 11q24.3  | 5p15.33 |
|           |     | 19q13.11  | 3q13.31 | 1p32.1    | 17p13.1  |           | 4q34.3   | 22q13.2 |
|           |     | 22q11.22  | 3q11.1  | 6q25.1    | 10p15.3  |           | 1p36.31  | 1p12    |
|           |     | 8q24.21   | 21q11.2 | 19q12     | 4q35.2   |           | 5p15.33  | 12q15   |
|           |     |           |         | 13q34     | 8p23.3   |           | 2q37.3   | 1q44    |
|           |     |           |         | 17p11.2   | 1p36.32  |           | 12q24.33 | 12q14.1 |
|           |     |           |         | 5p15.2    | 19q13.43 |           | 6q27     | 8q24.3  |
|           |     |           |         | 11q22.2   | 19p13.3  |           | 19p13.3  | 6p24.3  |
|           |     |           |         | 1q21.3    | 11q25    |           | 6q13     | 6q12    |
|           |     |           |         | 19p13.2   | 7q36.3   |           | 15q13.2  | 15q26.1 |
|           |     |           |         | 2p11.2    | 11p15.5  |           | 5q35.3   | 7p22.3  |
|           |     |           |         | 15q26.3   | 17q11.2  |           | 10q26.3  | 4q12    |
|           |     |           |         | 17q24.3   | 17p13.1  |           | 15q15.1  | 17q25.3 |
|           |     |           |         | 8p11.22   | 17q25.3  |           | 12q21.31 | 7q34    |
|           |     |           |         | 7q31.2    | 9q34.3   |           | 13q14.2  | 15q24.3 |
|           |     |           |         | 21q21.1   | 10q23.31 |           | 5q32     | 5q35.3  |
|           |     |           |         | 5q35.3    | 2p25.3   |           | 16q23.3  | 13q12.3 |
|           |     |           |         | 6p21.1    | 1q44     |           | 1p22.1   | 1q21.3  |
|           |     |           |         | 9p24.1    | 10q26.3  |           | 1q42.13  | 7q36.1  |
|           |     |           |         | 14q13.2   | 18q23    |           | 6q23.2   | 1p36.11 |
|           |     |           |         |           | 6q14.1   |           | 9p24.3   | 9p13.3  |
|           |     |           |         |           | 21q22.3  |           | 17p13.3  | 9p24.2  |
|           |     |           |         |           | 9p24.3   |           |          |         |
|           |     |           |         |           | 2q37.3   |           |          |         |
|           |     |           |         |           | 6p25.3   |           |          |         |
|           |     |           |         |           | 22q13.32 |           |          |         |
|           |     |           |         |           | 16q12.1  |           |          |         |
|           |     |           |         |           | 11q22.3  |           |          |         |
|           |     |           |         |           | 3p21.31  |           |          |         |
|           |     |           |         |           | 5p15.33  |           |          |         |
|           |     |           |         |           | 1p32.3   |           |          |         |
|           |     |           |         |           | 12q12    |           |          |         |
|           |     |           |         |           | 14q24.1  |           |          |         |
|           |     |           |         |           | 3q29     |           |          |         |
|           |     |           |         |           | 12p13.1  |           |          |         |
|           |     |           |         |           | 5q35.3   |           |          |         |
|           |     |           |         |           | 20q13.33 |           |          |         |
|           |     |           |         |           | 3q25.2   |           |          |         |
|           |     |           |         |           | 13q34    |           |          |         |
|           |     |           |         |           | 15q13.2  |           |          |         |
|           |     |           |         |           | 8q24.3   |           |          |         |

18p11.32  
12q24.33

---

/pe B

---

Del

---

9p21.3  
10q23.31  
11q23.3  
4q34.3  
2q37.3  
1p22.1  
1p36.31  
5q12.1  
10p15.3  
5q32  
10q26.3  
6q26  
3q13.31  
15q14  
16p13.3  
15q13.3  
15q21.1  
19p13.3  
9p23  
13q34  
8p23.3  
16q24.2  
10q21.1  
5p15.31  
14q23.3  
14q31.1  
16q23.1  
3q26.31  
4p16.3  
22q13.32  
13q12.11  
12q24.33  
16q11.2  
3p26.1  
17p13.3  
12q13.12  
6q21  
17q21.31

Supplementary Table 4. Significantly amplified and deleted genes across 7 cancer types

| COAD       |            |            |              | GBM       |                |           |              |            |
|------------|------------|------------|--------------|-----------|----------------|-----------|--------------|------------|
| Subtype A  |            | Subtype B  |              | Subtype A |                | Subtype B |              | Subtype C  |
| Amp        | Del        | Amp        | Del          | Amp       | Del            | Amp       | Del          | Amp        |
| IKZF3      | RBFOX1     | ERBB2      | RBFOX1       | CDK4      | CDKN2A         | [EGFR]    | CDKN2A       | CAPZA2     |
| CDX2       | PARK2      | ANK1       | MAF          | PDGFRA    | CDKN2C         | PDGFRA    | PTEN         | FSIP2      |
| [LOC72767  | FAM190A    | MYC        | FLRT3        | [EGFR]    | SLC16A7        | CDK4      | ERRFI1       | hsa-mir-54 |
| hsa-mir-48 | FLRT3      | CCND2      | BEND5        | MDM4      | QKI            | MDM4      | QKI          | CAV1       |
| C20orf160  | FHIT       | [USP12]    | hsa-mir-19   | POLH      | hsa-mir-14     | CDK6      | NPAS3        | PHYH       |
| PLAT       | WWOX       | ADA        | FHIT         | QRSL1     | PTEN           | CCND2     | hsa-mir-31   | CAV2       |
| FGF6       | BEND5      | hsa-mir-48 | hsa-mir-58   | NDUFA9    | hsa-mir-12     | CPM       | CYP2E1       | PRPF18     |
| ADA        | hsa-mir-58 | GIN51      | ING2         | CYP27B1   | ATP1B2         | PRDM2     | CDKN2C       | MET        |
| BYSL       | APC        | ZNF527     | PTEN         | PIK3C2B   | NR3C2          | [SOX2-OT] | hsa-mir-32   | CDC123     |
| ZNF507     | FOXC1      | [GATA6]    | PARK2        | MAD2L1BP  | hsa-mir-42     | DDX1      | RB1          | ST7        |
| [KLF5]     | hsa-mir-19 | [KLF5]     | FAM190A      | LOC100422 | CYP2E1         | FGFR3     | LINC00290    | USP6NL     |
| WHSC1L1    | SMAD4      | hsa-mir-12 | SMAD4        | DYRK4     | hsa-mir-60     | GSX2      | BANP         | TFEC       |
| PTHLH      | hsa-mir-13 | [LOC38827  | B2M          | METTL1    | hsa-mir-21     | TSPAN31   | AHCTF1       | OPTN       |
| [ZNF703]   | NAALADL2   | hsa-mir-58 | FOXC1        | LRRN2     | NPAS3          | PIK3C2B   | hsa-mir-31   | TES        |
| C17orf103  | hsa-mir-60 | PLCB4      | RAB9BP1      | GTPBP2    | hsa-mir-19     | C12orf5   | hsa-mir-62   | CELF2      |
| GIN51      | PTEN       | hsa-mir-63 | RBM11        | AKAP3     | hsa-mir-48     | MDM2      | EDN1         | ST7-AS1    |
| PCSK2      | hsa-mir-92 | EGFR       | hsa-mir-92   | TSPAN31   | hsa-mir-20     | PDPN      | ZMYND11      | NUDT5      |
| ELAVL4     | hsa-mir-12 | GRB7       | hsa-mir-54   | PLEKHA6   | CDKN2B         | MYCN      | CD33         | ST7-AS2    |
| hsa-mir-12 | hsa-mir-32 | FGF6       | NAALADL2     | MRPS18A   | USP15          | LETM1     | hsa-mir-42   | SEPHS1     |
| FABP4      | DNAH9      | HNF4A      | hsa-mir-74   | RAD51AP1  | CAHM           | MARCH9    | CXCR7        | ST7-OT4    |
| ZBPB2      | SMAD3      | IGF2       | PTGFR        | OS9       | hsa-mir-12     | MYCNOS    | hsa-mir-54   | UPF2       |
| PDX1       | hsa-mir-42 | NINL       | hsa-mir-32   | PPP1R15B  | KLLN           | TACC3     | CCNB1        | SEC61A2    |
| IGF2       | hsa-mir-59 | ZNF569     | hsa-mir-62   | XPO5      | hsa-mir-75     | AGAP2     | hsa-mir-34   | MCM10      |
| XKR7       | FNTA       | hsa-mir-58 | ACVR2A       | GALNT8    | SHBG           |           | EVI2A        | DHTKD1     |
| AP3M2      | LRRN3      | BYSL       | ZFP36L2      | MARCH9    | ZBTB48         |           | C9orf53      | FRMD4A     |
| FGF23      | hsa-mir-42 | PLCB1      | SOX9         | LOC127841 | DUX4           |           | KLLN         | CAMK1D     |
| HNF4A      | hsa-mir-43 | CYB561     | CDKN2A       | RSPH9     | MIR605         |           | PDE10A       | ECHDC3     |
| CCND3      | hsa-mir-54 | HPVC1      | hsa-mir-60   | C12orf4   | hsa-mir-628    |           | CPN2         | CCDC3      |
| DPY19L3    | hsa-mir-62 | IKZF3      | hsa-mir-56   | AGAP2     | hsa-mir-3182   |           | DUX4         | SFTA1P     |
| PPFIBP1    | hsa-mir-12 | FGF23      | WWOX         | LOC100130 | hsa-mir-675    |           | FAF1         | LOC219731  |
| NINL       | hsa-mir-94 | WISP2      | MACROD2      |           | hsa-mir-4309   |           | FAM19A5      | UCMA       |
| SNRPB2     | SOX9       | INS        | hsa-mir-3115 |           | C9orf53        |           | LPAR6        | BEND7      |
| AGBL4      | hsa-mir-12 | ABHD12     | PDE4D        |           | FAM19A2        |           | SCCPDH       | LOC254312  |
| AVP        | hsa-mir-15 | ZNF570     | IRF2         |           | hsa-mir-627    |           | hsa-mir-12   | C10orf47   |
| FABP5      | MACROD2    | C6         | ATAD1        |           | hsa-mir-15a    |           | hsa-mir-12   | LOC283070  |
| POLR1D     | PDE4D      | RUNX2      | TRIM69       |           | TP53           |           | GCNT2        | LOC439950  |
| INS        | FLJ11235   | LAMP5      | GMDS         |           | TNFRSF9        |           | TUBB8        | MIR4480    |
| C12orf4    | GMDS       | ACE        | ABCC13       |           | DUX2           |           | ETFB         |            |
| MYBL2      | CD52       | SEC61G     | hsa-mir-4318 |           | hsa-mir-1266   |           | hsa-mir-302e |            |
| SLC29A1    | ME2        | MIEN1      | hsa-mir-596  |           | hsa-mir-1972-2 |           | IQCA1        |            |
| LOC400684  | MGC45800   | DYRK4      | MIR4789      |           | hsa-mir-4298   |           | CAMK1D       |            |
| MED21      | MIR4789    | SERINC3    | DNAH9        |           | hsa-mir-1247   |           | CDK7         |            |
| ABHD12     | CSTF2T     | TH         | IFI44        |           | CDKN2B-AS1     |           | hsa-mir-1229 |            |

|           |            |           |                |                |              |
|-----------|------------|-----------|----------------|----------------|--------------|
| KIF16B    | PAPSS2     | C7        | ACR            | hsa-mir-4310   | EVI2B        |
| GNRH2     | hsa-mir-43 | CCND3     | hsa-mir-4310   | hsa-mir-3168   | C6orf118     |
| IL7       | hsa-mir-31 | PAK7      | ORC4           | RPL22          | GP5          |
| GSX1      | FAM19A5    | MAP3K3    | HAAO           | MTG1           | DUX2         |
| TH        | ZNF18      | LANCL2    | LOC100499467   | hsa-mir-147b   | LOC284933    |
| C12orf5   | hsa-mir-42 | MIR4728   | CDKN2B         | hsa-mir-140    | TFB2M        |
| SGK2      | CLN8       | RAD51AP1  | PRKG1          | hsa-mir-210    | KLF5         |
| GUCA1A    | SGK196     | PKIG      | hsa-mir-1471   | hsa-mir-656    | hsa-mir-147b |
| STK38L    | IMMP2L     | IGF2-AS1  | MACROD2-AS1    | hsa-mir-626    | HIVEP1       |
| OTOR      | HABP2      | C9        | hsa-mir-4253   | hsa-mir-621    | C10orf108    |
| IDH3B     | hsa-mir-19 | CDC5L     | PART1          | KCNAB2         | NKG7         |
| IMPA1     | hsa-mir-12 | ANKRD5    | STOX2          | SYCE1          | hsa-mir-483  |
| LNX2      | hsa-mir-43 | MRC2      | CFL1P1         | hsa-mir-1282   | ASB18        |
| IGF2-AS1  | hsa-mir-75 | VOPP1     | LOC647946      | hsa-mir-1538   | LOC283070    |
| SERINC3   | hsa-mir-57 | PRMT8     | ANGPT2         | AP2A2          | GTF2H2       |
| GUCA1B    | LOC100495  | C20orf111 | MAP2K4         | hsa-mir-370    | hsa-mir-4281 |
| FGFR1OP2  | CCNT2      | MIR483    | IFI44L         | hsa-mir-1233-2 | NF1          |
| MACROD2   | hsa-mir-11 | DAB2      | ARSA           | hsa-mir-4305   | LOC285796    |
| ITPA      | MACROD2    | DNAH8     | hsa-mir-626    | TNFRSF25       | HES1         |
| PMP2      | PART1      | LOC100131 | MBD5           | PAOX           | MTG1         |
| ATP5EP2   | FGR        | DCAF7     | MTA3           | hsa-mir-627    | LOC339685    |
| MIR483    | ELAC1      | VSTM2A    | MTAP           | hsa-mir-328    | SMYD3        |
| PKIG      | LINC00290  | PARP11    | CSTF2T         | RHOG           | DACH1        |
| MEA1      | MIR605     | JPH2      | hsa-mir-1244-1 | hsa-mir-345    | hsa-mir-1282 |
| TM7SF3    | ATAD1      | INS-IGF2  | hsa-mir-1256   | hsa-mir-1233-1 | MAK          |
| MACROD2   | MIR4318    | FGF10     | TRAPPC11       | ALOX5AP        | KLK10        |
| OXT       | hsa-mir-31 | SLC29A1   | KLLN           | PER3           | hsa-mir-675  |
| PKIA      | LOC284933  | TLK2      | MIR4318        | SPRNP1         | MIR4480      |
| PRHOXNB   | hsa-mir-54 | LOC285878 | DEFA1          | hsa-mir-4310   | CD180        |
| INS-IGF2  | MYOM2      | C12orf4   | ZNF18          | AARS           | hsa-mir-1271 |
| IFT52     | HGSNAT     | GDAP1L1   | ELTD1          | ART1           | OMG          |
| PEX6      | EIF3IP1    | MIR4686   | CHKB           | hsa-mir-342    | DKFZp451B082 |
| CCDC91    | NRAP       | FYB       | hsa-mir-1233-2 | hsa-mir-211    | LSG1         |
| PTPRA     | hsa-mir-31 | GLO1      | THADA          | ATP7B          | SYCE1        |
| TPD52     | hsa-let-7c | DDX42     | C9orf53        | VAMP3          | FLJ46257     |
| MIR4686   | hsa-mir-62 | FKBP9L    | MIR605         | FRG2B          | LOC149134    |
| C20orf111 | hsa-mir-15 | C12orf5   | ALPI           | hsa-mir-626    | LMO7         |
| POLH      | ADD1       | LOC79015  | hsa-mir-1290   | AP1G1          | hsa-mir-627  |
| ASUN      | DARS       | GDNF      | ENPP6          | ASCL2          | NEDD9        |
| SNRPB     | ACTN2      | GLP1R     | DEFA3          | hsa-mir-3173   | KLK11        |
| STMN2     | IFI6       | TANC2     | MIR744         | ACTC1          | hsa-mir-4298 |
| JPH2      | MIR1305    | EFCAB4B   | CPT1B          | BRCA2          | NAIP         |
| PPP2R5D   | CFL1P1     | TTPAL     | hsa-mir-1233-1 | KLHL21         | hsa-mir-585  |
| ARNTL2    | NBEAP1     | GHR       | PLEKHH2        | SPRN           | MIR4733      |
| TGM3      | MIR3201    | GUCA1A    | CDKN2B-AS1     | hsa-mir-1233-2 | CAHM         |
| HEY1      | hsa-mir-32 | TACO1     | LOC100506939   | AFG3L1P        | ATP13A3      |
| GDAP1L1   | DLGAP2     | TOX2      | ALPP           | CARS           | PAOX         |

|           |             |           |                |                |                  |
|-----------|-------------|-----------|----------------|----------------|------------------|
| PTK7      | POTEA       | HMGCS1    | ALPL           | hsa-mir-1260   | MIR3201          |
| KLHDC5    | TCF7L2      | GUCA1B    | RWDD4          | APBA2          | CNST             |
| ProSAPiP1 | hsa-mir-131 | CCDC47    | DEFA4          | RCBTB2         | PCDH9            |
| MRPS28    | CXADR       | FITM2     | TYMP           | UTS2           | hsa-mir-4310     |
| LOC79015  | BUB1B       | IL7R      | hsa-mir-211    | LOC619207      | TFAP2A           |
| PRPH2     | hsa-mir-31  | HSP90AB1  | OXER1          | hsa-mir-1233-1 | KLK8             |
| MRPS35    | ADRA2C      | LIMD2     | ALPPL2         | AGRP           | hsa-mir-210      |
| NOP56     | HNMT        | R3HDML    | C1QA           | CD81           | PIK3R1           |
| ZC2HC1A   | AGT         | LIFR      | LOC728175      | hsa-mir-625    | hsa-mir-218-2    |
| TTPAL     | SFN         | MDFI      | DEFA5          | B2M            | TMEM44           |
| SRF       | KLLN        | KCNH6     | MAPK11         | CPB2           | SPRNP1           |
| C12orf70  | IPW         | MIR3646   | hsa-mir-1268   | PARK7          | MIR4535          |
| UBOX5     | MIR4535     | OXCT1     | LOC728819      | DUX4L7         | LOC255654        |
| PAG1      | hsa-mir-54  | MEA1      | CHRNA7         | hsa-mir-211    | ATXN8OS          |
| TOX2      | ARHGEF10    | STRADA    | C1QB           | APRT           | hsa-mir-626      |
| TBCC      | TECTB       | LOC100505 | DEFA6          | CD151          | GCM2             |
| REP15     | AES         | PRKAA1    | MAPK12         | hsa-mir-548h-1 | KLK13            |
| C20orf194 | NCAM2       | MOCS1     | hsa-mir-3118-6 | BUB1B          | ADM              |
| SNX16     | CAPN3       | MARCH10   | LOC100129726   | ELF1           | RAD17            |
| FITM2     | hsa-mir-62  | PTGER4    | CHRNA7         | ACOT7          | hsa-mir-103-1-as |
| VEGFA     | ATP5I       | NFKBIE    | C1QC           | DUX4L6         | LRRC15           |
| C12orf71  | LCT         | LOC729683 | DEFB1          | ACTC1          | FRG2B            |
| SNORD57   | LYST        | RPL37     | SBF1           | ZFXH3          | UCHL3            |
| ZBTB10    | GPR3        | NFYA      | hsa-mir-3118-4 | CDKN1C         | hsa-mir-1233-2   |
| R3HDML    | NDN         | MIR548W   | HTR2B          | hsa-mir-4308   | TMEM14C          |
| MED20     | hsa-mir-38  | SEPP1     | CAPZB          | CAPN3          | SIGLEC7          |
| MANSC4    | KBTBD11     | PEX6      | DEFB4A         | ESD            | AP2A2            |
| SNORD56   | ACSL5       | SKP2      | PPP6R2         | CAMTA1         | SMN1             |
| ZFAND1    | AMH         | PGC       | ACTC1          | DUX4L5         | hsa-mir-146a     |
| GTSF1L    | TMPRSS15    | SLC1A3    | SP110          | ADAM10         | FAM43A           |
| POLR1C    | CKMT1B      | POLH      | CASP9          | C16orf3        | SPRN             |
| CPXM1     | hsa-mir-43  | ZNF131    | CLN8           | CTSD           | TBC1D4           |
| CHMP4C    | CRMP1       | PPP2R5D   | ZBED4          | hsa-mir-3172   | hsa-mir-1233-1   |
| MIR3646   | MCM6        | OSMR      | APBA2          | CHRM5          | ELOVL2           |
| MAD2L1BP  | GNG4        | PTK7      | INPP5D         | FOXO1          | SIGLEC9          |
| EBF4      | HMG2N       | NUP155    | RUNX3          | ICMT           | AMPD3            |
| SLC10A5   | SNRPN       | PRPH2     | MYOM2          | DUX4L3         | SMN2             |
| LOC100505 | NAT1        | PAIP1     | SCO2           | APBA2          | hsa-mir-3142     |
| CUL7      | FBXO25      | SRF       | NBEAP1         | CA5A           | XXYLT1           |
| FASTKD5   | ZDHHC6      | MRPS30    | KCNJ13         | DRD4           | LOC619207        |
| ZNF704    | ATP5D       | TBCC      | CDA            | hsa-mir-624    | PIBF1            |
| C6orf108  | BTG3        | NNT       | DLGAP2         | CHRNA7         | ACTC1            |
| VPS16     | EPB42       | VEGFA     | RABL2B         | FLT1           | PAK1IP1          |
| FABP9     | ATP7B       | TTC33     | BUB1B          | CHD5           | KLK14            |
| CNPY3     | CTBP1       | TFEB      | NCL            | DUX4L2         | APBB1            |
| FAM113A   | MGAT5       | NIPBL     | CDC42          | AQP9           | TAF9             |
| FABP12    | KCNK1       | SUPT3H    | MFHAS1         | CA7            | hsa-mir-1303     |

|           |           |           |          |              |              |
|-----------|-----------|-----------|----------|--------------|--------------|
| FRS3      | RPS6KA1   | FBXO4     | MLC1     | DUSP8        | FLJ34208     |
| MRPS26    | UBE3A     | KCNK5     | CAPN3    | hsa-mir-3171 | DUX4L7       |
| SLC22A7   | NAT2      | WDR70     | NEU2     | CKMT1B       | KLF12        |
| DDRKG1    | CSMD1     | NCR2      | CD52     | MLNR         | B2M          |
| CAPN11    | VTI1A     | CCL28     | ARHGEF10 | ERRFI1       | TMEM14B      |
| ZNF343    | AZU1      | MED20     | MAPK8IP2 | MIR3944      | KLK12        |
| CUL9      | USP25     | C5orf28   | CHRM5    | B2M          | RHOG         |
| SLC4A11   | GANC      | POLR1C    | NPPC     | CALB2        | SERF1A       |
| UBR2      | RCBTB2    | C5orf42   | RCC1     | HBB          | hsa-mir-3141 |
| TMC2      | DGKQ      | MAD2L1BP  | KBTBD11  | hsa-mir-4307 | LOC100131551 |
| KIAA0240  | CXCR4     | PARP8     | PLXNB2   | EPB42        | DUX4L6       |
| C20orf141 | LGALS8    | CUL7      | CHRNA7   | GTF2F2       | DIS3         |
| ZNF318    | SLC9A1    | SPEF2     | PDE6D    | HES2         | BUB1B        |
| STK35     | MKRN3     | RCAN2     | CLCNKA   | BUB1B        | ADTRP        |
| YIPF3     | ADRA1A    | CARD6     | SPAG11B  | CBFA2T3      | CTU1         |
| TGM6      | C8orf42   | C6orf108  | BRD1     | HBBP1        | ART1         |
| USP49     | LOC143188 | LMBRD2    | GABRA5   | hsa-mir-208b | SMA4         |
| SNORA51   | HCN2      | CNPY3     | PSMD1    | GANC         | hsa-mir-1294 |
| GNMT      | CHODL-AS1 | EMB       | CLCNKB   | GUCY1B2      | LOC100507391 |
| SNORD86   | GCHFR     | FRS3      | FBXO25   | DNAJC11      | DUX4L5       |
| PRICKLE4  | CPB2      | HEATR7B2  | FAM19A5  | CAPN3        | PCDH17       |
| SNORD110  | EVC       | SLC22A7   | GABRB3   | CBFB         | CAPN3        |
| MRPL2     | KYNU      | EGFLAM    | PTMA     | HBD          | C6orf228     |
| SNORD119  | MTR       | APOBEC2   | CNR2     | hsa-mir-1201 | CLDND2       |
| GTPBP2    | ARID1A    | NADKD1    | AGPAT5   | GATM         | ASCL2        |
| LOC100134 | PAR5      | CAPN11    | NCAPH2   | HMGB1        | SMA5         |
| MRPS18A   | ASAH1     | UGT3A1    | GABRG3   | PLEKHG5      | hsa-mir-378  |
| TMEM239   | ERICH1    | ENPP4     | SNORD20  | CHRM5        | DUX4L3       |
| MRPS10    | GUCY2GP   | CAPSL     | DDOST    | CDH1         | KLHL1        |
| MIR1292   | BSG       | CUL9      | DEFB103B | HBE1         | CHRM5        |
| TMEM63B   | LINC00308 | LOC153684 | MOV10L1  | SERPINA3     | SYCP2L       |
| TRERF1    | ITPKA     | UBR2      | GANC     | GCHFR        | VSIG10L      |
| XPO5      | ELF1      | UGT3A2    | SAG      | HTR2A        | CARS         |
| MRPL14    | FGFR3     | DAAM2     | E2F2     | NOL9         | SLC30A5      |
| DLK2      | ZEB2      | NIM1      | CSMD1    | CHRNA7       | hsa-mir-145  |
| TTBK1     | NID1      | KIAA0240  | MIOX     | CDH3         | DUX4L2       |
| RRP36     | NR0B2     | RANBP3L   | GCHFR    | HBG1         | PCDH20       |
| ABCC10    | SNURF     | ZNF318    | SP100    | ACTN1        | CHRNA7       |
| KLC4      | ATP6V1B2  | RICTOR    | ECE1     | PDIA3        | LINC00518    |
| TJAP1     | ZNF596    | YIPF3     | MCPH1    | KPNA3        | KLK9         |
| KLHDC3    | MIR4295   | C5orf51   | PANX2    | TAS1R1       | CCKBR        |
| TAF8      | CDC34     | USP49     | IPW      | CKMT1B       | CENPH        |
| PTCRA     | C21orf91  | PLCXD3    | SPP2     | CDH5         | hsa-mir-584  |
| C6orf223  | IVD       | GNMT      | EPHA2    | HBG2         | MIR3944      |
| RSPH9     | ESD       | HCN1      | PPP1R3B  | ACYP1        | BORA         |
| LRRC73    | GAK       | PRICKLE4  | ALG12    | ITPKA        | CKMT1B       |
| RPL7L1    | NXPH2     | C5orf34   | ITPKA    | LCP1         | C6orf52      |

|           |            |           |          |         |              |
|-----------|------------|-----------|----------|---------|--------------|
| CRIP3     | TARBP1     | MRPL2     | DGKD     | ESPN    | SIGLECP3     |
| C6orf226  | FCN3       | C5orf39   | EPB41    | CYP19A1 | CD81         |
| ATP6V0CP3 | CYFIP1     | CLIC5     | ERI1     | CDH11   | MRPS36       |
| C6orf132  | BMP1       | SNORD72   | CRELD2   | HRAS    | ADRA1B       |
| LOC100132 | LOC286083  | TREM2     | IVD      | AKT1    | TDRD3        |
| TOMM6     | CIRBP      | LOC646715 | GPR55    | IVD     | CYP19A1      |
|           | CHODL      | TREM1     | EPHA8    | MAB21L1 | ERVFRD-1     |
|           | LTK        | LOC648987 | CLDN23   | THAP3   | C19orf75     |
|           | FOXO1      | GTPBP2    | ADM2     | DUT     | CD151        |
|           | GRK4       | MIR580    | LTK      | CDH13   | MARVELD2     |
|           | RAB3GAP1   | MRPS18A   | TRIP12   | IGF2    | ADRB2        |
|           | TBCE       | CCDC152   | EPHB2    | ANG     | DIAPH3       |
|           | MAP3K6     | MRPS10    | DEFB104A | LTK     | DUT          |
|           | C15orf2    | LOC100132 | TRABD    | SMAD9   | TMEM170B     |
|           | POLR3D     | TMEM63B   | MEIS2    | PHF13   | IGLON5       |
|           | OR4F21     | MIR3650   | ECEL1    | EPB42   | CDKN1C       |
|           | CNN2       | SAYS1     | EXTL1    | CDH15   | CCDC125      |
|           | C21orf91-C | LOC100506 | SGK223   | INS     | ANXA6        |
|           | MAP1A      | TRERF1    | SELO     | APEX1   | KCTD12       |
|           | MLNR       | EGFLAM-A  | TRPM1    | MAP1A   | EPB42        |
|           | HTT        | LRFN2     | EIF4E2   | NEK3    | LOC100130275 |
|           | UBXN4      | AARS2     | EYA3     | NPHP4   | TPP1         |
|           | GPR137B    | XPO5      | C8orf42  | FBN1    | MAST4        |
|           | WASF2      | ENPP5     | HDAC10   | CDH16   | ATOX1        |
|           | MAGEL2     | ZFAND3    | NDN      | IRF7    | PRR20A       |
|           | BNIP3L     | MRPL14    | ARL4C    | ARF6    | FBN1         |
|           | RPL23AP53  | DLK2      | FGR      | MEIS2   | LOC100506409 |
|           | CSNK1G2    | TREML2    | ERICH1   | PCDH8   | CNGA4        |
|           | D21S2088E  | KCNK16    | SHANK3   | GPR153  | LOC647859    |
|           | PLCB2      | TTBK1     | OCA2     | FGF7    | BNIP1        |
|           | GTF2F2     | RRP36     | NMUR1    | COX4I1  | COMMD6       |
|           | HGFAC      | KCNK17    | FUCA1    | KCNQ1   | FGF7         |
|           | R3HDM1     | ABCC10    | ZNF596   | ARG2    | CTSD         |
|           | TSNAX      | KLC4      | TUBGCP6  | MFAP1   | GUSBP3       |
|           | CNKSRI     | TJAP1     | PLCB2    | UBL3    | CAMK2A       |
|           | ATP10A     | BTBD9     | SP140    | RNF207  | OR7E156P     |
|           | CHRNA2     | FOXP4     | IFI6     | GABPB1  | GABPB1       |
|           | MIR596     | KLHDC3    | DEFT1P   | CTRB1   | DRD4         |
|           | CFD        | TAF8      | LOC90834 | LSP1    | GTF2H2B      |
|           | LINC00317  | PTCRA     | RAD51    | ARHGAP5 | CANX         |
|           | RAD51      | TCTE1     | SH3BP4   | TRPM1   | LINC00550    |
|           | GUCY1B2    | SPATS1    | GALE     | RB1     | GALK2        |
|           | IDUA       | C6orf223  | DEFB105A | HES3    | DUSP8        |
|           | LRP1B      | RSPH9     | LMF2     | GALK2   | GTF2H2C      |
|           | GNPAT      | LRRC73    | RYR3     | CTRL    | CCNG1        |
|           | NUDC       | TREML2P1  | NGEF     | MUC2    | LINC00347    |
|           | NIPA2      | LOC221442 | SFN      | BCL2L2  | GANC         |

|           |           |            |            |              |
|-----------|-----------|------------|------------|--------------|
| CLU       | C6orf130  | DEFB106A   | PLCB2      | EIF4G2       |
| LOC100287 | KIF6      | KLHDC7B    | RFC3       | SERF1B       |
| ARID3A    | TSPO2     | SCG5       | MIR4252    | CD74         |
| LINC00320 | UNC5CL    | SNORD82    | GANC       | MZT1         |
| SPINT1    | TREML4    | GPR3       | CYBA       | GATM         |
| HTR2A     | RPL7L1    | DEFB107A   | MUC6       | HBB          |
| LETM1     | TREML1    | LOC284933  | BDKRB1     | GTF2H2D      |
| ARHGAP15  | TREML3    | SNRPN      | RAD51      | CDX1         |
| GGPS1     | SLC35B2   | GIGYF2     | RFXAP      | CTAGE11P     |
| WDTC1     | FLJ41649  | HMGN2      | MIR4689    | GCHFR        |
| SNORD107  | CRIP3     | FLJ10661   | GATM       | HBBP1        |
| DPYSL2    | C6orf226  | RPL23AP82  | DHODH      | GUSBP9       |
| EFNA2     | TMEM151   | SPINT1     | NAP1L4     | CLTB         |
| LINC00478 | ATP6V0CP  | CAB39      | BDKRB2     | PRR20B       |
| SRP14     | C6orf132  | HMGCL      | RYR3       | PDIA3        |
| KPNA3     | MIR586    | LOC286083  | SLC7A1     | HBD          |
| LRPAP1    | TDRG1     | C22orf34   | MIR4417    | LOC100170939 |
| GTDC1     | LOC100131 | SRP14      | GCHFR      | CSF1R        |
| TOMM20    | LOC100132 | UGT1A10    | NQO1       | PRR20C       |
| STX12     | TOMM6     | HSPG2      | NUP98      | HDC          |
| TUBGCP5   | MIR4647   | LOC349196  | BMP4       | HBE1         |
| EGR3      | MIR4641   | CHKB-CPT1B | SCG5       | LOC100272216 |
| ELANE     | MIR4642   | THBS1      | TPT1       | CSNK1A1      |
| MIRLET7C  |           | UGT1A8     | PDIA3      | PRR20D       |
| THBS1     |           | HTR1D      | DYNC1L1    | ONECUT1      |
| LCP1      |           | XKR5       | SLC22A18   | HBG1         |
| MSX1      |           | IL17REL    | ZFP36L1    | OCLN         |
| YSK4      |           | TJP1       | SORD       | NKX2-5       |
| CAPN9     |           | UGT1A7     | TRPC4      | PRR20E       |
| AHDC1     |           | HTR6       | HDC        | ITPKA        |
| NIPA1     |           | DEFB103A   | DPEP1      | HBG2         |
| EPB49     |           | FAM116B    | SLC22A18AS | DBN1         |
| GAMT      |           | TYRO3      | CALM1      | MIR1297      |
| MIR125B2  |           | UGT1A6     | SPINT1     | IVD          |
| TP53BP1   |           | ID3        | TNFSF11    | HPX          |
| MAB21L1   |           | OR4F21     | ONECUT1    | DIAPH1       |
| MYL5      |           | PIM3       | E2F4       | MIR3169      |
| THSD7B    |           | UBE3A      | POLR2L     | LTK          |
| COG2      |           | UGT1A5     | SERPINA6   | HRAS         |
| ZNF593    |           | STMN1      | SRP14      | DOCK2        |
| PAR1      |           | FAM90A13   | SUCLA2     | MAP1A        |
| EPHX2     |           | ODF3B      | ITPKA      | IGF2         |
| GNA11     |           | MKRN3      | FANCA      | DPYSL3       |
| MIR99A    |           | UGT1A9     | PSMD13     | MEIS2        |
| TYRO3     |           | MFAP2      | ENTPD5     | ILK          |
| SMAD9     |           | FAM90A5    | THBS1      | DRD1         |
| PDE6B     |           | SYCE3      | DLEU2      | MFAP1        |

|               |               |               |            |
|---------------|---------------|---------------|------------|
| TMEM163       | PAR5          | IVD           | INS        |
| RBM34         | UGT1A4        | FOXF1         | SLC26A2    |
| GPN2          | NBL1          | RNH1          | MYO5A      |
| LOC283683     | FAM90A7       | CDKN3         | IRF7       |
| EXTL3         | LOC100128946  | TJP1          | DUSP1      |
| GNA15         | JMJD7-PLA2G4B | TSC22D1       | NEDD4      |
| C21orf37      | UGT1A1        | LIPC          | KCNQ1      |
| JMJD7-PLA2G4B | OPRD1         | FOXL1         | EBF1       |
| NEK3          | FAM90A8       | MRPL23        | PLCB2      |
| PPP2R2C       | LOC100144603  | CEBPE         | LMO1       |
| ZRANB3        | SNAP23        | TP53BP1       | F12        |
| DISC2         | UGT1A3        | CCNA1         | MAPK6      |
| AIM1L         | PAFAH2        | LTK           | LSP1       |
| OR4N4         | FAM90A18      | FOXC2         | FABP6      |
| PTK2B         | MIR3201       | RPLP2         | RAB27A     |
| GNG7          | HERC2         | CFL2          | MUC2       |
| SNAP23        | PID1          | TYRO3         | FAT2       |
| PCDH8         | PAX7          | DCLK1         | RAD51      |
| RGS12         | FAM90A9       | MAP1A         | MUC6       |
| LYPD1         | MIR4535       | GALNS         | FGF1       |
| DISC1         | SNURF         | RRM1          | RYR3       |
| PIGV          | ATG16L1       | FOXN3         | NAP1L4     |
| HERC2P3       | PLA2G2A       | SLC30A4       | FGFR4      |
| FGL1          | FAM90A10      | KL            | SCG5       |
| MKNK2         | AQR           | MEIS2         | NUP98      |
| TGM5          | USP40         | GAS8          | FOXI1      |
| RB1           | PLA2G5        | SCT           | SLC12A1    |
| RNF4          | DEFA10P       | CHGA          | SLC22A18   |
| ACMSD         | ARHGAP11A     | EIF3J         | FLT4       |
| ARID4B        | HJURP         | ITM2B         | SORD       |
| GPATCH3       | PPP1R8        | MFAP1         | SLC22A18AS |
| GOLGA6L1      | DEFB107B      | GCSH          | GABRA1     |
| GFRA2         | SLC12A6       | TRIM21        | SPINT1     |
| GPX4          | COPS7B        | CKB           | POLR2L     |
| PIIP5K1       | PTAFR         | JMJD7-PLA2G4B | GABRA6     |
| RFXAP         | DEFB104B      | MTRF1         | SRP14      |
| SH3BP2        | RASGRP1       | TRPM1         | PSMD13     |
| SPOPL         | TRPM8         | GLG1          | GABRB2     |
| EGLN1         | RAP1GAP       | STIM1         | TCF12      |
| CEP85         | DEFB106B      | CMA1          | RNH1       |
| GOLGA8IP      | GPR176        | SNAP23        | GABRG2     |
| GNRH1         | ARMC9         | UTP14C        | THBS1      |
| GZMM          | RHCE          | MYO1E         | MRPL23     |
| LCMT2         | DEFB105B      | HAS3          | GABRP      |
| TPT1          | CHP           | TALDO1        | TP53BP1    |
| WFS1          | EFHD1         | LTB4R         | RPL27A     |
| NCKAP5        | RHD           | HERC2         | GLRA1      |

|               |              |           |               |
|---------------|--------------|-----------|---------------|
| KIAA1383      | DEFB109P1B   | FRY       | TYRO3         |
| LIN28A        | OIP5         | MYO5A     | RPLP2         |
| SNORD108      | ITM2C        | HP        | GM2A          |
| LOXL2         | RPA2         | TH        | SLC30A4       |
| GADD45B       | RPL23AP53    | CRIP1     | RRM1          |
| RASGRP1       | BAHD1        | SLC28A2   | GRK6          |
| TRPC4         | DNER         | LPAR6     | EIF3J         |
| WHSC1         | RPL11        | NEDD4     | SCT           |
| DKFZp686O1327 | FAM90A14     | HPR       | GPX3          |
| HEATR1        | FAN1         | TSPAN4    | JMJD7-PLA2G4B |
| DHDDS         | B3GNT7       | CRIP2     | SMPD1         |
| SNORD109A     | RPS6KA1      | TGM5      | GRIA1         |
| LPL           | SPAG11A      | SLC25A15  | SNAP23        |
| NFIC          | MAPKBP1      | PLCB2     | TRIM21        |
| GPR176        | SP140L       | HSBP1     | NR3C1         |
| TNFSF11       | RSC1A1       | TNNI2     | USP8          |
| WHSC2         | MIR596       | CTSG      | ST5           |
| MIR128-1      | GOLGA8A      | PPIP5K1   | GRM6          |
| ERO1LB        | DIS3L2       | LHFP      | SLC28A2       |
| SH3BGRL3      | SDHB         | MAPK6     | STIM1         |
| SNORD109B     | DEFA1B       | HSD11B2   | HK3           |
| MSR1          | RTF1         | TNNT3     | CCPG1         |
| OAZ1          | SPATA3       | DAD1      | TAF10         |
| CHP           | SLC9A1       | AQR       | HMMR          |
| SUCLA2        | FAM90A20     | TRIM13    | COPS2         |
| ZNF141        | CYFIP1       | RAB27A    | TALDO1        |
| LOC647012     | FBXO36       | HSD17B2   | HNRNPAB       |
| SIPA1L2       | TAF12        | TRPC2     | TGM5          |
| TMEM222       | FAM90A19     | COCH      | TEAD1         |
| SNORD115-1    | MGA          | ARHGAP11A | HNRNPH1       |
| NEFM          | SLC16A14     | USPL1     | PIGB          |
| PALM          | TCEA3        | RAD51     | TH            |
| OIP5          | FAM66B       | HSF4      | HRH2          |
| DLEU2         | VPS39        | PHLDA2    | PPIP5K1       |
| SLBP          | LOC151475    | DIO2      | TSPAN4        |
| PABPC1P2      | TCEB3        | LCMT2     | NDST1         |
| ARV1          | ZNF705G      | MRPS31    | AQR           |
| ZDHHC18       | FAM189A1     | RYR3      | TNNI2         |
| WHAMMP3       | LINC00471    | IRF8      | HTR4          |
| NEFL          | ZBTB17       | ZNF195    | SECISBP2L     |
| POLR2E        | FAM66E       | DIO3      | TNNT3         |
| BAHD1         | C15orf2      | SLC12A6   | IL12B         |
| TSC22D1       | LOC151484    | DLEU1     | ARHGAP11A     |
| NOP14         | SLC30A2      | SCG5      | TRPC2         |
| LOC100129961  | LOC100132396 | KARS      | ITK           |
| TTC13         | TMEM87A      | RASSF7    | LCMT2         |
| SYTL1         | MSL3P1       | DLST      | PHLDA2        |

|              |              |         |         |
|--------------|--------------|---------|---------|
| POTEB        | LUZP1        | RASGRP1 | KCNMB1  |
| NKX3-1       | LOC100287015 | N4BP2L2 | SLC12A6 |
| POLRMT       | RPAP1        | SLC12A1 | TUB     |
| MAPKBP1      | C2orf57      | LCAT    | LCP2    |
| CCNA1        | ARID1A       | IFITM1  | BCL2L10 |
| FAM193A      | DEFT1P2      | DYNC1H1 | WEE1    |
| ZEB2-AS1     | DKFZP434L187 | SERF2   | LTC4S   |
| PCNXL2       | TIGD1        | OLFM4   | RASGRP1 |
| UBXN11       | SNHG3        | SORD    | ZNF143  |
| SNORD64      | DEFB4B       | MAF     | MFAP3   |
| PCM1         | GREM1        | BRSK2   | SERF2   |
| PRTN3        | C2orf72      | EIF2S1  | ZNF195  |
| RTF1         | NR0B2        | GPR176  | MGAT1   |
| DCLK1        | MIR548I3     | POSTN   | GNB5    |
| C4orf6       | RPUSD2       | SPINT1  | ZNF214  |
| MIR3679      | ECEL1P2      | MC1R    | MSX2    |
| C1orf124     | FCN3         | TSPAN32 | ARPP19  |
| FAM46B       | MIR4659A     | EIF5    | ZNF215  |
| PAR4         | EHD4         | CHP     | NPM1    |
| PDGFRL       | LOC348761    | HSPH1   | SLC27A2 |
| PTBP1        | AKR7A2       | SRP14   | RASSF7  |
| MGA          | MIR4660      | CHST6   | PCDH1   |
| ITM2B        | NDUFAF1      | TSSC4   | GPR176  |
| MFSD10       | C2orf82      | ELK2AP  | PPFIBP2 |
| LOC100507600 | ALDH4A1      | OIP5    | PCDHGC3 |
| NTPCR        | MIR4659B     | SUGT1   | CHP     |
| C1orf172     | NUSAP1       | TCF12   | IFITM1  |
| PAR-SN       | DNAJB3       | MVD     | PDE6A   |
| PNOC         | EIF4G3       | TRIM22  | OIP5    |
| RPS15        | LOC100652791 | EML1    | OR6A2   |
| VPS39        | TMEM85       | BAHD1   | PDGFRB  |
| MTRF1        | PRSS56       | LECT1   | BAHD1   |
| MAEA         | MAP3K6       | THBS1   | DCHS1   |
| KIAA1804     | SPTBN5       | NFATC3  | POU4F3  |
| FAM76A       | SNORA75      | IFITM3  | CEP152  |
| LOC348120    | C1orf38      | ERH     | EIF3F   |
| PPP2R2A      | KLF13        | FAN1    | PPP2R2B |
| SGTA         | SCARNA6      | WBP4    | MAPKBP1 |
| CCNDBP1      | CROCC        | TJP1    | BRSK2   |
| UTP14C       | MAGEL2       | CHMP1A  | MAPK9   |
| PCGF3        | SCARNA5      | DEAF1   | GOLGA8A |
| C1orf198     | ZBTB40       | ESR2    | MICAL2  |
| ZNF683       | DLL4         | MAPKBP1 | PROP1   |
| GOLGA8E      | LOC100286922 | AKAP11  | RTF1    |
| PPP3CC       | CELA3A       | TP53BP1 | CTR9    |
| STK11        | INO80        | PLCG2   | RARS    |
| TMEM87A      | MIR1471      | IFITM2  | MGA     |

|           |           |               |          |
|-----------|-----------|---------------|----------|
| LPAR6     | WASF2     | ESRRB         | TRIM66   |
| SPON2     | PPP1R14D  | GOLGA8A       | RPS14    |
| C1orf131  | MIR1244-1 | EXOSC8        | DMXL2    |
| CATSPER4  | HNRNPR    | TYRO3         | TSPAN32  |
| OR4M2     | MTMR10    | PSKH1         | SGCD     |
| SFTPC     | MIR1244-3 | OR7E12P       | VPS39    |
| TCF3      | SRRM1     | FKBP3         | TSSC4    |
| RPAP1     | ZNF770    | RTF1          | SLC6A7   |
| SLC25A15  | MIR1244-2 | FNDC3A        | AP4E1    |
| TACC3     | CNKSRI    | SLC30A4       | MRVI1    |
| EDARADD   | HAUS2     | PSMB10        | SLC34A1  |
| TRNP1     | MIR4777   | KCNQ10T1      | CCNDBP1  |
| OR4N3P    | GMEB1     | FOXG1         | TRIM22   |
| SLC7A2    | FAM82A2   | MGA           | SLIT3    |
| THOP1     | NUDC      | PDS5B         | EID1     |
| RPUSD2    | DNAJC17   | EIF3J         | IFITM3   |
| LHFP      | SRSF10    | PSMD7         | SNCB     |
| MXD4      | NOP10     | PKP3          | C15orf63 |
| SLC35F3   | RCAN3     | FNTB          | DEAF1    |
| CD164L2   | NDNL2     | VPS39         | SPARC    |
| HERC2P2   | MST1P2    | KIAA0564      | TMEM87A  |
| SLC18A1   | C15orf24  | JMJD7-PLA2G4B | IPO7     |
| TLE2      | MST1P9    | RPL13         | SPINK1   |
| TUBGCP4   | PAK6      | SIRT3         | RPAP1    |
| TRIM13    | PADI2     | FOS           | IFITM2   |
| CPLX1     | CASC5     | FAM189A1      | STK10    |
| B3GALNT2  | LYPLA2    | ZC3H13        | PYGO1    |
| LOC644961 | AVEN      | SNAP23        | TRIM3    |
| NF1P2     | DNAJC8    | RRAD          | TAF7     |
| STC1      | ATP10A    | OR52A1        | PLDN     |
| MADCAM1   | AKR7A3    | FUT8          | OR7E12P  |
| EHD4      | GJD2      | CCNDBP1       | ZNF354A  |
| MRPS31    | SPEN      | SPG20         | GREM1    |
| SLC26A1   | VPS18     | ALDH1A2       | LYVE1    |
| EXOC8     | KDM1A     | ST3GAL2       | TCOF1    |
| SCARNA1   | ZFP106    | PGAP2         | RPUSD2   |
| LOC503519 | WDTC1     | GALC          | KCNQ10T1 |
| FZD3      | CHAC1     | C15orf63      | TTC1     |
| SF3A2     | KIAA0090  | LRCH1         | TUBGCP4  |
| NDUFAF1   | C15orf29  | USP8          | PKP3     |
| DLEU1     | PLEKHM2   | SLC9A5        | STC2     |
| D4S234E   | NIPA2     | C11orf21      | SCG3     |
| IRF2BP2   | OTUD3     | GCH1          | SWAP70   |
| MIR1976   | C15orf41  | TMEM87A       | PCDHGB4  |
| CHEK2P2   | DNAJC16   | MTUS2         | TMOD3    |
| TUSC3     | ZFYVE19   | CCNB2         | DENND5A  |
| PPAP2C    | UBR4      | SLC12A4       | ADAM19   |

|              |           |              |          |
|--------------|-----------|--------------|----------|
| NUSAP1       | DISP2     | TRPM5        | TMOD2    |
| OLFM4        | ATP13A2   | GMFB         | RRP8     |
| STX18        | CHRFAM7A  | RPAP1        | FGF18    |
| FAM89A       | CELA3B    | INTS6        | EHD4     |
| LOC646214    | ULK4P3    | SLC28A2      | SIRT3    |
| ADAM7        | PADI4     | SNTB2        | HDAC3    |
| S1PR4        | ULK4P1    | UBQLN3       | DUOX2    |
| SPTBN5       | TMEM50A   | GPR33        | OR52A1   |
| POSTN        | ARHGAP11B | DKFZP434L187 | SQSTM1   |
| FGFRL1       | STX12     | CKAP2        | MYEF2    |
| C1orf31      | ATPBD4    | CCPG1        | ARFIP2   |
| CXADRP2      | CLIC4     | SPG7         | ATP6V0E1 |
| TNFRSF10D    | C15orf57  | IGF2-AS1     | NDUFAF1  |
| AP3D1        | SYF2      | GPX2         | OR5E1P   |
| DLL4         | C15orf23  | PLDN         | PTTG1    |
| SUGT1        | C1orf144  | NUFIP1       | RSL24D1  |
| CYTL1        | BMF       | COPS2        | OR10A3   |
| TRIM67       | LDLRAP1   | TAT          | PDLIM7   |
| REREP3       | SNORD107  | BET1L        | NUSAP1   |
| TNFRSF10C    | PLA2G2D   | GSTZ1        | FXC1     |
| MED16        | CHST14    | GREM1        | CNOT8    |
| INO80        | RNU11     | NBEA         | TMEM85   |
| LECT1        | TUBGCP5   | TGM5         | DKK3     |
| PIGG         | HSPB7     | TERF2        | HAND1    |
| SNRPD2P2     | NIPA1     | CEND1        | SPTBN5   |
| LOC653061    | AHDC1     | GTF2A1       | RBMXL2   |
| TNFRSF10B    | PLA2G4E   | RPUSD2       | MED7     |
| FSTL3        | SMPDL3B   | PCDH17       | CTDSPL2  |
| PPP1R14D     | PAR1      | PIGB         | PGAP2    |
| WBP4         | LINC00339 | TK2          | ADAMTS2  |
| STK32B       | LOC145845 | TRIM34       | DUOX1    |
| SNORA14B     | PADI1     | BRF1         | C11orf21 |
| SNORD116-19  | TMCO5A    | TUBGCP4      | RNF14    |
| TNFRSF10A    | PLA2G2E   | C13orf15     | DLL4     |
| APC2         | CSNK1A1P1 | PIIP5K1      | TRPM5    |
| HAUS2        | HP1BP3    | ZNF19        | CLINT1   |
| AKAP11       | OTUD7A    | CDHR5        | INO80    |
| LYAR         | CELA2B    | GZMH         | UBQLN3   |
| LOC100287814 | SPRED1    | EHD4         | PCDHGA8  |
| GOLGA6L6     | ZNF593    | MED4         | ZNF280D  |
| FGF17        | PGBD4     | AQR          | RNF141   |
| ABCA7        | MRTO4     | ZNF23        | MAML1    |
| FAM82A2      | EXD1      | TOLLIP       | TRPM7    |
| EXOSC8       | YTHDF2    | GZMB         | IGF2-AS1 |
| KIAA1530     | FSIP1     | DUOX2        | KIAA0141 |
| LGALS8-AS1   | PADI3     | DNAJC15      | PPP1R14D |
| LOC727924    | RHOV      | SECISBP2L    | BET1L    |

|              |            |           |          |
|--------------|------------|-----------|----------|
| DOK2         | WNT4       | GAN       | JAKMIP2  |
| HMG20B       | LPCAT4     | TRIM68    | ZNF770   |
| DNAJC17      | FBXO42     | HIF1A     | CEND1    |
| FNDCA3       | PLA2G4F    | NDUFAF1   | GFPT2    |
| ZFYVE28      | RNF186     | ALG5      | FLJ10038 |
| MIR1182      | LRRC57     | ARHGAP11A | CYB5R2   |
| GOLGA8C      | GPN2       | SLC7A5    | GNPDA1   |
| MTMR7        | C15orf55   | PIDD      | HAUS2    |
| UQCR11       | FBLIM1     | FOXA1     | TRIM34   |
| PAK6         | LOC283683  | NUSAP1    | G3BP1    |
| KIAA0564     | MED18      | VPS36     | FAM82A2  |
| TNIP2        | OR4N4      | LCMT2     | CDHR5    |
| MIR1537      | PQLC2      | CDK10     | TNIP1    |
| PWRN1        | LOC283710  | KCNQ1DN   | DNAJC17  |
| ENTPD4       | TRNAU1AP   | HNRNPC    | TOLLIP   |
| SBNO2        | FAM98B     | TMEM85    | GNB2L1   |
| CASC5        | AIM1L      | PHF11     | MNS1     |
| ZC3H13       | PLA2G4D    | SLC12A6   | USP47    |
| HAUS3        | XKR8       | TRADD     | SLU7     |
| LINC00184    | HERC2P3    | MMP26     | NOP10    |
| PWRN2        | ARHGEF10L  | HSPA2     | TRIM68   |
| PHYHIP       | GOLGA6L1   | SPTBN5    | RG514    |
| HMHA1        | TMEM57     | POMP      | MYO5C    |
| STARD9       | GOLGA8G    | BCL2L10   | PIDD     |
| SPG20        | CAMK2N1    | MBTPS1    | CPLX2    |
| ABCA11P      | GOLGA8IP   | CHRNA10   | FAM214A  |
| TSNAX-DISC1  | ASAP3      | HSP90AA1  | KCNQ1DN  |
| SNORD116-1   | SNORD108   | CTDSPL2   | C5orf4   |
| SORBS3       | PNRC2      | UFM1      | C15orf24 |
| SHC2         | SNORD109A  | RASGRP1   | PARVA    |
| VPS18        | PIGV       | CES2      | FAM114A2 |
| LRCH1        | SNORD109B  | PNPLA2    | PAK6     |
| MFSD7        | NBPF1      | IFI27     | MMP26    |
| LOC100506795 | SNORD115-1 | KLF13     | TCERG1   |
| SNORD116-2   | NECAP2     | SOHLH2    | DTWD1    |
| NPM2         | WHAMMP3    | SERF2     | AKIP1    |
| TIMM13       | RCC2       | NAE1      | BTNL3    |
| ZFP106       | POTEB      | PHRF1     | CASC5    |
| INTS6        | FAM54B     | ITPK1     | C11orf16 |
| TMEM175      | FMN1       | DUOX1     | LMAN2    |
| LOC100506810 | C1orf63    | ENOX1     | AVEN     |
| SNORD116-3   | SNORD64    | GNB5      | TMEM9B   |
| PNMA2        | PITHD1     | NOL3      | SPINK5   |
| DAZAP1       | PAR4       | SIGIRR    | GJD2     |
| CHAC1        | MAN1C1     | JAG2      | NRIP3    |
| CKAP2        | PAR-SN     | DLL4      | SOX30    |
| TMEM128      | NIPAL3     | RCBTB1    | STARD9   |

|             |           |          |          |
|-------------|-----------|----------|----------|
| MIR4753     | LOC348120 | ARPP19   | ASCL3    |
| SNORD116-4  | SEPN1     | TAF1C    | MGAT4B   |
| ADAM28      | MRPL42P5  | RIC8A    | VPS18    |
| FGF22       | KIF17     | KLC1     | CHRNA10  |
| TMEM62      | C15orf52  | INO80    | B4GALT7  |
| NUFIP1      | GRHL3     | NUDT15   | SQRDL    |
| C4orf42     | GOLGA8E   | SLC27A2  | PNPLA2   |
| MIR4671     | IL22RA1   | SLC7A6   | SYNPO    |
| SNORD116-5  | OR4M2     | EPS8L2   | ZFP106   |
| LZTS1       | GPATCH3   | KTN1     | PHRF1    |
| SLC39A3     | OR4N3P    | PPP1R14D | RNF44    |
| ZFYVE19     | PLA2G2F   | KIAA1704 | RFX7     |
| NBEA        | HERC2P2   | GPR176   | SCUBE2   |
| TMEM129     | CEP85     | USP10    | ABLIM3   |
| MIR4427     | C15orf53  | CHID1    | SPATA5L1 |
| SNORD116-6  | PINK1     | LGALS3   | ZBED5    |
| XPO7        | C15orf54  | MTMR10   | HMGXB3   |
| THEG        | PHACTR4   | FAM48A   | CHAC1    |
| DISP2       | MIR211    | CHP      | SIGIRR   |
| C13orf15    | C1orf135  | ATP6V0D1 | TBC1D9B  |
| EVC2        | NF1P2     | OR51G1   | C15orf29 |
| SNORD116-7  | RSG1      | LTBP2    | RIC8A    |
| TRIM35      | HERC2P9   | ZNF770   | ARHGAP26 |
| FZR1        | MUL1      | THSD1    | ATP8B4   |
| C15orf57    | WHAMMP2   | OIP5     | MRPL17   |
| MED4        | LIN28A    | BCAR1    | ATP10B   |
| OTOP1       | GOLGA8B   | OR51B4   | WDR76    |
| SNORD116-8  | AGMAT     | MARK3    | EPS8L2   |
| RHOBTB2     | EIF2AK4   | HAUS2    | N4BP3    |
| LSM7        | FAM110D   | CYSLTR2  | TMEM62   |
| C15orf23    | LOC503519 | BAHD1    | STK33    |
| DNAJC15     | DHDDS     | C16orf7  | FAF2     |
| ZNF595      | C15orf62  | OR51B2   | SEMA6D   |
| SNORD116-9  | ZNF436    | MAX      | CHID1    |
| PSD3        | C15orf56  | FAM82A2  | WWC1     |
| MBD3        | TAS1R2    | SPRYD7   | SPG11    |
| BMF         | PHGR1     | FAN1     | OR51G1   |
| ALG5        | ACTL8     | KIAA0513 | FBXW11   |
| JAKMIP1     | CHEK2P2   | OR52N1   | ELL3     |
| SNORD116-10 | SH3BGR13  | MGAT2    | OR51B4   |
| SLC39A14    | LOC646214 | DNAJC17  | LARP1    |
| MIER2       | SESN2     | COG6     | C15orf48 |
| CHST14      | CXADRP2   | CEP152   | OR51B2   |
| VPS36       | TMEM222   | PIEZO1   | ZNF346   |
| FAM53A      | LOC646278 | SLC25A22 | C15orf41 |
| SNORD116-11 | USP48     | CTAGE5   | OR52N1   |
| FGF20       | REREP3    | NOP10    | GEMIN5   |

|             |             |           |          |
|-------------|-------------|-----------|----------|
| PCSK4       | NBPF3       | NAA16     | SPPL2A   |
| TGM7        | LOC653061   | MAPKBP1   | RIC3     |
| PHF11       | ZDHHC18     | DHX38     | PCDHGA12 |
| ZBTB49      | LOC653075   | ATHL1     | ZFYVE19  |
| SNORD116-12 | DDI2        | ATXN3     | SLC25A22 |
| ADAMDEC1    | MIR626      | NDNL2     | CCDC69   |
| C19orf24    | TRIM63      | RNASEH2B  | CGNL1    |
| CATSPER2    | MIR627      | GOLGA8A   | ATHL1    |
| UFM1        | CROCCP2     | IST1      | TSPAN17  |
| ZNF721      | ANP32AP1    | OR51G2    | FRMD5    |
| SNORD116-13 | SYTL1       | MAP3K9    | OR51G2   |
| CNOT7       | SNORD116-19 | C15orf24  | OR4F3    |
| PLEKHJ1     | IGSF21      | DHRS12    | DISP2    |
| PLA2G4E     | GOLGA6L6    | RTF1      | OR51E2   |
| SOHLH2      | SNHG12      | ATP2C2    | HAVCR1   |
| ZNF718      | LOC727924   | OR51E2    | ULK4P3   |
| SNORD116-14 | C1orf201    | MMP14     | PTDSS2   |
| ZDHHC2      | OIP5-AS1    | PAK6      | CYFIP2   |
| BTBD2       | UBXN11      | KIAA0226L | ULK4P1   |
| TMCO5A      | GOLGA8C     | MGA       | MOB2     |
| ENOX1       | ATPIF1      | CLEC3A    | PRELID1  |
| CRIPAK      | PWRN1       | PTDSS2    | ATPBD4   |
| SNORD116-15 | CROCCP3     | ALDH6A1   | SBF2     |
| SLC25A37    | PWRN2       | CASC5     | IL17B    |
| RNF126      | RAB42       | PROSER1   | C15orf57 |
| ZSCAN29     | SNORD116-1  | DMXL2     | FAM160A2 |
| RCBTB1      | FAM46B      | CHST4     | MAT2B    |
| LOC285484   | SNORD116-2  | MOB2      | C15orf23 |
| SNORD116-16 | C1orf172    | MNAT1     | MICALCL  |
| SCARA3      | SNORD116-3  | AVEN      | MRPL22   |
| NCLN        | IFFO2       | CDADC1    | BMF      |
| TTBK2       | SNORD116-4  | VPS39     | TRIM5    |
| NUDT15      | MYOM3       | MPHOSPH6  | TLX3     |
| DOK7        | SNORD116-5  | TRIM5     | SHF      |
| SNORD116-17 | KLHDC7A     | MTHFD1    | SYT8     |
| KCTD9       | SNORD116-6  | GJD2      | KCNIP1   |
| SPPL2B      | VWA5B1      | CAB39L    | DUOXA1   |
| CDAN1       | SNORD116-7  | FAM189A1  | PRKCDBP  |
| KIAA1704    | UBXN10      | NUTF2     | ZNF354C  |
| FLJ35424    | SNORD116-8  | SYT8      | CHST14   |
| SNORD116-18 | ARHGEF19    | MYH6      | ODF3     |
| PIWIL2      | SNORD116-9  | STARD9    | RPL26L1  |
| WDR18       | C1orf213    | CCDC70    | CASC4    |
| STRC        | SNORD116-10 | AP4E1     | OSBPL5   |
| FAM48A      | PDIK1L      | COX4NB    | C5orf45  |
| RNF212      | SNORD116-11 | ODF3      | TGM7     |
| SNORD116-20 | C1orf64     | MYH7      | LRRC56   |

|             |             |              |           |
|-------------|-------------|--------------|-----------|
| ELP3        | SNORD116-12 | VPS18        | DCTN4     |
| REXO1       | IL28RA      | COG3         | CATSPER2  |
| SPRED1      | SNORD116-13 | CCNDBP1      | MRGPRE    |
| THSD1       | FAM43B      | TUBB3        | PCDH12    |
| C4orf10     | SNORD116-14 | OSBPL5       | LEO1      |
| SNORD116-21 | PAQR7       | NDUFB1       | ART5      |
| INTS10      | SNORD116-15 | SQRDL        | DDX41     |
| ZNF77       | FAM76A      | SETDB2       | PLA2G4E   |
| ADAL        | SNORD116-16 | EID1         | TRIM78P   |
| CYSLTR2     | AKR7L       | CFDP1        | NOP16     |
| NAT8L       | SNORD116-17 | LRRC56       | TRIM69    |
| SNORD116-22 | TMCO4       | NEDD8        | TRIM6     |
| CCDC25      | SNORD116-18 | ZFP106       | LARS      |
| CELF5       | ZNF683      | KATNAL1      | C15orf43  |
| EXD1        | SNORD116-20 | C15orf63     | OR52E2    |
| SPRYD7      | MDS2        | CTCF         | HMP19     |
| C4orf44     | SNORD116-21 | MRGPRE       | LOC145663 |
| SNORD116-23 | LOC284632   | NFATC4       | OR52J3    |
| INTS9       | SNORD116-22 | SPATA5L1     | UIMC1     |
| TLE6        | SLC25A34    | KBTBD7       | LOC145783 |
| FSIP1       | SNORD116-23 | TMEM87A      | OR51L1    |
| COG6        | ESPNP       | NFAT5        | RAB24     |
| FAM86EP     | SNORD116-24 | ART5         | FLJ27352  |
| SNORD116-24 | LOC339505   | NFKBIA       | OR51A7    |
| CSGALNACT1  | SNORD116-25 | CHAC1        | RBM27     |
| LPPR3       | FAM131C     | EBPL         | LOC145845 |
| RHOV        | SNORD115-2  | RPAP1        | OR51S1    |
| NAA16       | PADI6       | WWP2         | NEURL1B   |
| POLN        | SNORD116-26 | TRIM78P      | TMCO5A    |
| SNORD116-25 | SPATA21     | NOVA1        | OR51F2    |
| HR          | SNORD116-27 | C15orf29     | FAM193B   |
| ZNF556      | CATSPER4    | C13orf33     | ZSCAN29   |
| UBR1        | SNORD115-3  | DKFZP434L187 | OR52R1    |
| RNASEH2B    | TMEM82      | PRDM7        | TMED9     |
| C4orf48     | SNORD115-4  | TRIM6        | TTBK2     |
| SNORD115-2  | TRNP1       | PNP          | OR52M1    |
| PBK         | SNORD115-5  | WDR76        | CDHR2     |
| OR4F17      | CD164L2     | KBTBD6       | CDAN1     |
| PLA2G4F     | SNORD115-6  | PYGO1        | OR52K2    |
| DHRS12      | PLA2G2C     | DDX19B       | CCDC99    |
| LOC402160   | SNORD115-7  | OR52E2       | STRC      |
| SNORD116-26 | SH2D5       | NRL          | OR5P2     |
| ZNF395      | SNORD115-8  | TMEM62       | THG1L     |
| FAM108A1    | C1orf130    | STARD13      | DYX1C1    |
| LRRC57      | SNORD115-9  | PLDN         | OR5P3     |
| KIAA0226L   | LDLRAD2     | GABARAPL2    | GALNT10   |
| ZNF876P     | SNORD115-10 | OR52J3       | CSNK1A1P1 |

|              |               |           |           |
|--------------|---------------|-----------|-----------|
| SNORD116-27  | UQCRHL        | SIX6      | OR2D3     |
| BIN3         | SNORD115-11   | SPG11     | NHP2      |
| DOHH         | MINOS1        | N4BP2L1   | OTUD7A    |
| FAM98B       | SNORD115-12   | GREM1     | OR2D2     |
| PROSER1      | LOC644961     | MON1B     | RBM22     |
| ZNF732       | SNORD115-13   | OR51L1    | SPRED1    |
| SNORD115-3   | LOC646471     | OTX2      | OR52W1    |
| MTUS1        | SNORD115-14   | ELL3      | RNF130    |
| KLF16        | LOC653566     | EPSTI1    | PGBD4     |
| PLA2G4D      | SNORD115-15   | RPUSD2    | OR56A4    |
| CDADC1       | SCARNA1       | TCF25     | PCDHGC5   |
| SCARNA22     | SNORD115-16   | OR51A7    | ADAL      |
| SNORD115-4   | SNORA44       | OXA1L     | OR56A1    |
| KIAA1967     | SNORD115-17   | C15orf48  | PCDHGC4   |
| DOT1L        | SNORA61       | ARL11     | EXD1      |
| MRPL42P5     | SNORD115-18   | TUBGCP4   | SYT9      |
| CAB39L       | SNORA16A      | PHLPP2    | PCDHGB7   |
| MIR943       | SNORD115-19   | OR51S1    | FSIP1     |
| SNORD115-5   | SNORD99       | PAX9      | OR52B4    |
| SH2D4A       | SNORD115-20   | C15orf41  | PCDHGB6   |
| KISS1R       | LOC729059     | WDFY2     | RHOV      |
| C15orf52     | SNORD115-21   | SCG3      | C11orf40  |
| CCDC70       | FLJ37453      | ZCCHC14   | PCDHGB5   |
| LOC100129917 | SNORD115-22   | OR51F2    | C15orf33  |
| SNORD115-6   | MIR1976       | SERPINA5  | OR52I2    |
| PDLIM2       | SNORD115-23   | ZFYVE19   | PCDHGB3   |
| LMNB2        | MIR3115       | CG030     | UBR1      |
| C15orf53     | SNORD115-25   | TMOD3     | OR51E1    |
| COG3         | MIR4253       | KIAA0182  | PCDHGB2   |
| LOC100130872 | SNORD115-26   | OR52R1    | PATL2     |
| SNORD115-7   | MIR3917       | PCK2      | UBQLNL    |
| EBF2         | SNORD115-29   | FRMD5     | PCDHGB1   |
| MUM1         | MIR3675       | LINC00284 | LPCAT4    |
| C15orf54     | SNORD115-30   | TMOD2     | LOC143666 |
| SETDB2       | LOC100506730  | ATMIN     | PCDHGA11  |
| LOC100133461 | SNORD115-31   | OR52M1    | PLA2G4F   |
| SNORD115-8   | LOC100506801  | PGF       | OR10A5    |
| FAM160B2     | SNORD115-32   | DISP2     | PCDHGA10  |
| MIDN         | LOC100506963  | CSNK1A1L  | LRRCS7    |
| EIF2AK4      | SNORD115-33   | EHD4      | OR2AG1    |
| KBTBD7       | C1orf151-NBL1 | COTL1     | PCDHGA9   |
| TMED11P      | SNORD115-34   | OR52K2    | LYSMD2    |
| SNORD115-9   | MIR4695       | SERPINA1  | DNHD1     |
| NUDT18       | SNORD115-35   | CHRFAM7A  | PCDHGA7   |
| R3HDM4       | MIR4684       | RXFP2     | C15orf55  |
| CATSPER2P1   | SNORD115-36   | DUOX2     | SCGB1C1   |
| EBPL         | MIR378F       | MLYCD     | PCDHGA6   |

|              |              |           |           |
|--------------|--------------|-----------|-----------|
| LOC100507266 | SNORD115-37  | OR56A4    | WDR72     |
| SNORD115-10  | RCAN3AS      | SERPINA4  | C11orf42  |
| DOCK5        | SNORD115-38  | ULK4P3    | PCDHGA5   |
| C19orf6      | SNORD115-39  | TEX26     | HMG2P46   |
| CKMT1A       | SNORD115-40  | MYEF2     | NLRP6     |
| KBTD6        | SNORD115-41  | SF3B3     | PCDHGA4   |
| MIR378D1     | SNORD115-42  | OR56A1    | SLC24A5   |
| SNORD115-11  | SNORD115-43  | PIGH      | NS3BP     |
| FLJ14107     | SNORD115-44  | ULK4P1    | PCDHGA3   |
| TPGS1        | SNORD116-28  | PRR20A    | PRTG      |
| C15orf62     | SNORD116-29  | NDUFAF1   | OR56B4    |
| EPSTI1       | SNORD115-48  | CES3      | PCDHGA2   |
| MIR4800      | SNORD115-24  | OR52B4    | LOC283663 |
| SNORD115-12  | SNORD115-27  | PNN       | LOC255512 |
| REEP4        | SNORD115-28  | ARHGAP11B | PCDHGA1   |
| REEP6        | SNORD115-45  | FAM216B   | FAM98B    |
| C15orf56     | SNORD115-47  | RSL24D1   | OR52B2    |
| ARL11        | LOC100128714 | ADAT1     | PCDHGB8P  |
| HTT-AS1      | LOC100131089 | C11orf40  | PLA2G4D   |
| SNORD115-13  | ANKRD63      | POLE2     | C11orf35  |
| STMN4        | HERC2P7      | ATPBD4    | NMUR2     |
| IZUMO4       | GOLGA8F      | LACC1     | GLDN      |
| PHGR1        | GOLGA8DP     | NUSAP1    | OR51F1    |
| WDFY2        | JMJD7        | CHST5     | KIAA1191  |
| SNORD115-14  | PLA2G4B      | OR52I2    | FMN1      |
| CHMP7        | ULK4P2       | PPM1A     | OR51B5    |
| SCAMP4       | LOC100288615 | C15orf57  | ERGIC1    |
| MIR626       | LOC100288637 | LINC00330 | MRPL42P5  |
| LINC00284    | LOC100289656 | TMEM85    | KRT8P41   |
| SNORD115-15  | MIR1233-1    | EDC4      | CLK4      |
| VPS37A       | MIR1233-2    | OR51E1    | USP50     |
| ADAT3        | MIR4310      | PPP2R5C   | LOC283104 |
| MIR627       | MIR3942      | C15orf23  | ODZ2      |
| CSNK1A1L     | LOC100505648 | HNRNPA1L2 | TEX9      |
| SNORD115-16  | LOC100507466 | SPTBN5    | CSNK2A1P  |
| NKX2-6       | MIR4509-1    | PLA2G15   | CNOT6     |
| ZNF554       | MIR4509-2    | UBQLNL    | C15orf52  |
| OIP5-AS1     | MIR4508      | PPP2R5E   | OR51V1    |
| PRR20A       | MIR4510      | BMF       | KCTD16    |
| SNORD115-17  | MIR4509-3    | ST13P4    | TNFAIP8L3 |
| SGCZ         | MIR4715      | CTDSPL2   | H19       |
| GRIN3B       | TMCO5B       | COG4      | HMHB1     |
| LOC100131089 |              | LOC143666 | SHC4      |
| FAM216B      |              | PRKCH     | EFCAB4A   |
| SNORD115-18  |              | SHF       | C5orf54   |
| PEBP4        |              | B3GALT1   | CTXN2     |
| ZNF57        |              | KLF13     | TMEM80    |

|              |           |            |
|--------------|-----------|------------|
| ANKRD63      | PLEKHG4   | NSD1       |
| LACC1        | SCGB1C1   | C15orf53   |
| SNORD115-19  | PRKD1     | OR10A4     |
| CDCA2        | DUOXA1    | GMCL1P1    |
| JSRP1        | DGKH      | C15orf54   |
| JMJD7        | DUOX1     | OLFML1     |
| LINC00330    | LRRC29    | ARAP3      |
| SNORD115-20  | NLRP6     | DUOXA2     |
| ESCO2        | LGMN      | LOC283299  |
| MOB3A        | CHST14    | RMND5B     |
| PLA2G4B      | CCDC122   | GOLGA8B    |
| HNRNPA1L2    | DLL4      | C11orf36   |
| SNORD115-21  | CPNE7     | RANBP17    |
| FBXO16       | NS3BP     | EIF2AK4    |
| MFSD12       | PSEN1     | NLRP10     |
| MIR4310      | CASC4     | PCYOX1L    |
| ST13P4       | STOML3    | CATSPER2P1 |
| SNORD115-22  | INO80     | NLRP14     |
| C8orf48      | VPS4A     | CCNJL      |
| GIPC3        | OR56B4    | UNC13C     |
| LOC100505648 | PSMA3     | ANO9       |
| DGKH         | TGM7      | SH3TC2     |
| SNORD115-23  | EEF1DP3   | CKMT1A     |
| R3HCC1       | FAM63B    | LOC338651  |
| C19orf21     | IL17C     | PANK3      |
| CCDC122      | LOC255512 | SERINC4    |
| SNORD115-25  | PSMA6     | B4GALNT4   |
| LGI3         | CATSPER2  | SAP30L     |
| PLK5         | FAM194B   | C15orf62   |
| STOML3       | RNF111    | OR52L1     |
| SNORD115-26  | NOB1      | BTNL8      |
| LOC254896    | OR52B2    | C15orf56   |
| C2CD4C       | PSMB5     | OR2AG2     |
| FAM194B      | PLA2G4E   | DOK3       |
| SNORD115-29  | SPERT     | PHGR1      |
| LOC286059    | ZNF280D   | OR52B6     |
| CIRBP-AS1    | TMEM208   | ZFP2       |
| SPERT        | C11orf35  | LOC645212  |
| SNORD115-30  | PSMC1     | OR10A2     |
| EFHA2        | TRIM69    | RUFY1      |
| C19orf25     | DLEU7     | MIR626     |
| DLEU7        | TRPM7     | OVCH2      |
| SNORD115-31  | FHOD1     | CPEB4      |
| LOC286114    | OR51F1    | MIR627     |
| ATP8B3       | PSMC6     | PDDC1      |
| FAM124A      | C15orf43  | PRR7       |
| SNORD115-32  | FAM124A   | MIR628     |

|              |           |              |
|--------------|-----------|--------------|
| SCARA5       | PPP1R14D  | GALNTL4      |
| DIRAS1       | ANKRD11   | NDFIP1       |
| TPTE2P3      | OR51B5    | ANP32AP1     |
| SNORD115-33  | PSME1     | MRGPRG       |
| LOC389641    | LOC145663 | OR4F16       |
| ZNF555       | TPTE2P3   | LOC728758    |
| CTAGE10P     | MTMR10    | KRTAP5-1     |
| SNORD115-34  | ZDHHC1    | FBXO38       |
| C8orf80      | OR51V1    | OIP5-AS1     |
| C19orf26     | PSME2     | KRTAP5-3     |
| SLC25A30     | LOC145845 | YIPF5        |
| SNORD115-35  | CTAGE10P  | MIR147B      |
| MIR320A      | ZNF770    | KRTAP5-4     |
| CSNK1G2-AS1  | OSGIN1    | TRIM7        |
| SUGT1P3      | H19       | LOC100129387 |
| SNORD115-36  | PTGDR     | IFITM5       |
| MIR383       | TMCO5A    | TIGD6        |
| C19orf77     | SLC25A30  | LOC100131089 |
| SIAH3        | FLJ10038  | FAM99A       |
| SNORD115-37  | PARD6A    | SPRY4        |
| C8orf58      | EFCAB4A   | ANKRD63      |
| ODF3L2       | PTGER2    | OR56B1       |
| KCNRG        | ZSCAN29   | MXD3         |
| SNORD115-38  | PAN3      | LOC100132724 |
| LOC100128993 | HAUS2     | GVINP1       |
| ADAMTSL5     | CKLF      | THOC3        |
| LINC00282    | TMEM80    | JMJD7        |
| SNORD115-39  | ABCD4     | OR52K1       |
| MIR4287      | TTBK2     | SPINK7       |
| TMPRSS9      | SUGT1P3   | PLA2G4B      |
| FREM2        | FAM82A2   | OR52I1       |
| SNORD115-40  | NIP7      | TRIM52       |
| MIR4288      | C11orf36  | ULK4P2       |
| NDUFS7       | PYGL      | OR51D1       |
| NEK5         | CDAN1     | HAVCR2       |
| SNORD115-41  | SIAH3     | LOC100288615 |
| MIR3622A     | DNAJC17   | OR52A5       |
| C19orf35     | FAM96B    | AGXT2L2      |
| THSD1P1      | ANO9      | MIR1233-1    |
| SNORD115-42  | RABGGTA   | OR51B6       |
| MIR3622B     | STRC      | C5orf62      |
| WASH5P       | KCNRG     | MIR1266      |
| KCTD4        | MNS1      | OR51M1       |
| SNORD115-43  | GIN52     | FCHSD1       |
| LOC100507156 | LOC338651 | MIR1282      |
| ONECUT3      | RAD51B    | OR51Q1       |
| NHLRC3       | CSNK1A1P1 | UNC5A        |

|              |           |                |
|--------------|-----------|----------------|
| SNORD115-44  | LINC00282 | LOC100306975   |
| MEX3D        | NOP10     | OR51I1         |
| SERP2        | TPPP3     | TRIM41         |
| SNORD116-28  | B4GALNT4  | MIR1233-2      |
| FLJ45445     | MOK       | OR51I2         |
| SERTM1       | OTUD7A    | BOD1           |
| SNORD116-29  | SLC46A3   | MIR4310        |
| PRSS57       | MYO5C     | OR52D1         |
| LINC00547    | TRAPPC2L  | COL23A1        |
| SNORD115-48  | OR52L1    | MIR3942        |
| FAM138F      | ARID4A    | OR52H1         |
| LINC00548    | SPRED1    | TIMD4          |
| SNORD115-24  | FREM2     | LOC100505648   |
| LINGO3       | NDNL2     | OR52N4         |
| MIR15A       | WWOX      | ZNF300         |
| SNORD115-27  | OR52B6    | LOC100507466   |
| FAM138A      | RNASE1    | OR52N5         |
| MIR16-1      | PGBD4     | MYOZ3          |
| SNORD115-28  | NEK5      | SERF2-C15ORF63 |
| C19orf71     | FAM214A   | OR52N2         |
| ALG11        | BCMO1     | UBTD2          |
| SNORD115-45  | PDDC1     | DYX1C1-CCPG1   |
| LOC100288123 | RNASE2    | OR52E6         |
| TSC22D1-AS1  | ADAL      | SCGB3A1        |
| SNORD115-47  | THSD1P1   | MIR4510        |
| MIR1909      | C15orf24  | OR52E8         |
| TTL          | TERF2IP   | SFXN1          |
| LOC100128714 | MRGPRG    | MIR4716        |
| MIR1227      | RNASE3    | OR52E4         |
| SERPINE3     | EXD1      | GPRIN1         |
| HERC2P7      | KCTD4     | MIR4713        |
| MIR3187      | PAK6      | OR56A3         |
| SNORA31      | PRMT7     | PWWP2A         |
| GOLGA8DP     | KRTAP5-1  | MIR4712        |
| MIR4321      | RNASE4    | OR56A5         |
| MIR621       | FSIP1     | C1QTNF2        |
| MIR4509-1    | NHLRC3    | TMCO5B         |
| MIR4745      | DTWD1     | OR10A6         |
| CCDC169      | NECAB2    | SCGB3A2        |
| MIR4509-2    | KRTAP5-3  | MYZAP          |
| PRR20B       | RNASE6    | OR51T1         |
| MIR4508      | RHOV      | ZNF354B        |
| PRR20C       | SERP2     | OR51A4         |
| MIR4509-3    | CASC5     | C5orf47        |
| PRR20D       | KLHDC4    | OR51A2         |
| MIR4715      | KRTAP5-4  | PPARGC1B       |
| PRR20E       | RPL36AL   | IFITM10        |

|                |             |              |
|----------------|-------------|--------------|
| TPT1-AS1       | UBR1        | C5orf58      |
| MIR1297        | SERTM1      | MIR210       |
| MIR548F5       | AVEN        | OR2Y1        |
| MIR759         | HYDIN       | KRTAP5-5     |
| MIR320D1       | IFITM5      | AFAP1L1      |
| MIR4305        | RPS29       | KRTAP5-2     |
| MIR3613        | PATL2       | GRPEL2       |
| OR7E37P        | LINC00547   | KRTAP5-6     |
| SPG200S        | GJD2        | LSM11        |
| LOC100507240   | DEF8        | TMEM41B      |
| LOC100509894   | FAM99A      | GPR151       |
| CCDC169-SOHLH2 | RTN1        | LOC440028    |
| MIR4703        | LPCAT4      | ZNF300P1     |
| LOC100616668   | LINC00548   | TRIM6-TRIM34 |
|                | STARD9      | NUDCD2       |
|                | DUS2L       | MIR483       |
|                | OR56B1      | UBLCP1       |
|                | SALL2       | SNORA3       |
|                | PLA2G4F     | SLC36A2      |
|                | MIR15A      | SNORA52      |
|                | VPS18       | SPINK13      |
|                | CHTF8       | LOC644656    |
|                | OR52K1      | C5orf41      |
|                | SEL1L       | RASSF10      |
|                | LRRC57      | LOC153469    |
|                | MIR16-1     | LOC650368    |
|                | SQRDL       | BTNL9        |
|                | TXNL4B      | LOC653486    |
|                | OR52I1      | PPP1R2P3     |
|                | SRSF5       | SNORA23      |
|                | C15orf55    | FAM71B       |
|                | LOC440131   | SNORA45      |
|                | ZFP106      | PRELID2      |
|                | BANP        | SNORA54      |
|                | OR51D1      | SH3RF2       |
|                | SIX1        | SNORD97      |
|                | HMG2P46     | PLAC8L1      |
|                | ALG11       | INS-IGF2     |
|                | RFX7        | RNF145       |
|                | PDPR        | MUC5B        |
|                | OR52A5      | HIGD2A       |
|                | SLC8A3      | LOC729013    |
|                | LOC283710   | FAM153B      |
|                | TSC22D1-AS1 | MIR675       |
|                | SPATA5L1    | LOC202181    |
|                | RFWD3       | MRVI1-AS1    |
|                | OR51B6      | STK32A       |

|          |              |
|----------|--------------|
| SLC10A1  | FAM99B       |
| FAM98B   | SLC36A1      |
| ZAR1L    | LOC100133161 |
| CHAC1    | EIF4E1B      |
| LRRC36   | MRPL23-AS1   |
| OR51M1   | RASGEF1C     |
| SNAPC1   | MIR4298      |
| PLA2G4D  | LOC257358    |
| TTL      | MIR4299      |
| C15orf29 | EFCAB9       |
| DDX19A   | MTRNR2L8     |
| OR51Q1   | SH3PXD2B     |
| SOS2     | MIR210HG     |
| GOLGA8G  | LOC285593    |
| SERPINE3 | LOC100506305 |
| SLTM     | FAM153A      |
| FBXL8    | MIR4686      |
| OR51I1   | ARL10        |
| SPTB     | MIR4485      |
| FMN1     | RELL2        |
| SNORA31  | MIR4687      |
| ATP8B4   | LOC285626    |
| SMPD3    | LOC285627    |
| OR51I2   | LOC285629    |
| SRP54    | SLC36A3      |
| MRPL42P5 | KIF4B        |
| MIR621   | OR2V2        |
| WDR76    | ZNF454       |
| ZNF821   | C5orf60      |
| OR52D1   | LOC340037    |
| SSTR1    | ARSI         |
| C15orf52 | PFN3         |
| CCDC169  | ZNF879       |
| TMEM62   | IRGM         |
| ZDHHC7   | FBLL1        |
| OR52H1   | NIPAL4       |
| STYX     | C5orf25      |
| C15orf53 | FLJ38109     |
| PRR20B   | C5orf46      |
| SEMA6D   | ARHGEF37     |
| VAC14    | SPINK6       |
| OR52N4   | MIR103A1     |
| TEP1     | MIR143       |
| C15orf54 | MIR145       |
| PRR20C   | MIR146A      |
| SPG11    | MIR218-2     |
| FTSJD1   | SPINK14      |

|            |              |
|------------|--------------|
| OR52N5     | FNDC9        |
| TGFB3      | FLJ16171     |
| DUOXA2     | MIR340       |
| PRR20D     | SNORD95      |
| ELL3       | SNORD96A     |
| DDX28      | LOC643201    |
| OR52N2     | GRXCR2       |
| TGM1       | SPINK9       |
| MIR211     | ZFP62        |
| PRR20E     | CBY3         |
| POLR2M     | FAM153C      |
| TSNAXIP1   | SNORA74B     |
| OR52E6     | MIR585       |
| NKX2-1     | MIR143HG     |
| HERC2P9    | LOC728554    |
| LINC00426  | LOC729080    |
| C15orf48   | AACSP1       |
| CENPN      | LOC729678    |
| OR52E8     | OR4F29       |
| TNFAIP2    | FAM196B      |
| WHAMMP2    | LOC100132062 |
| TPT1-AS1   | LOC100132287 |
| C15orf41   | LOC100133331 |
| C16orf61   | C5orf52      |
| OR52E4     | LOC100268168 |
| TRAF3      | MIR1229      |
| GOLGA8B    | MIR103B1     |
| PAN3-AS1   | MIR3142      |
| SPPL2A     | MIR3141      |
| THAP11     | MIR4281      |
| OR56A3     | MIR3912      |
| TSHR       | LOC100505658 |
| EIF2AK4    | LOC100507387 |
| MIR1297    | MIR4634      |
| ZFYVE19    | MIR4638      |
| JPH3       | MIR378E      |
| OR56A5     | LOC100859930 |
| VRK1       |              |
| CATSPER2P1 |              |
| MIR548F5   |              |
| CGNL1      |              |
| PDP2       |              |
| OR51T1     |              |
| WARS       |              |
| CKMT1A     |              |
| MIR759     |              |
| FRMD5      |              |

RANBP10  
OR51A4  
XRCC3  
SERINC4  
MIR320D1  
DISP2  
VAT1L  
OR51A2  
YY1  
C15orf62  
MIR4305  
CHRFAM7A  
KIAA1609  
IFITM10  
ZBTB25  
C15orf56  
MIR3613  
ULK4P3  
WFDC1  
MIR210  
PABPN1  
PHGR1  
OR7E37P  
ULK4P1  
PDF  
KRTAP5-5  
DPF3  
LOC645212  
TEX26-AS1  
ARHGAP11B  
DPEP2  
KRTAP5-2  
GPR68  
LOC646278  
SPG20OS  
ATPBD4  
DPEP3  
KRTAP5-6  
TCL1A  
LOC653075  
LOC100507240  
C15orf57  
MTHFSD  
TRIM6-TRIM34  
GPR65  
MIR626  
LOC100509894

C15orf23  
ACD  
MIR483  
GEMIN2  
MIR627  
CCDC169-SOHLH2  
BMF  
DBNDD1  
SNORA52  
NUMB  
ANP32AP1  
MIR4703  
SHF  
FA2H  
LOC650368  
ADAM21  
LOC728758  
LOC100616668  
DUOXA1  
FAM65A  
LOC653486  
ADAM20  
OIP5-AS1  
LDHAL6B  
TMEM231  
SNORA54  
ADAM6  
MIR147B  
CHST14  
TMCO7  
INS-IGF2  
DLK1  
LOC100131089  
CASC4  
WDR59  
MUC5B  
CCNK  
ANKRD63  
TGM7  
ELMO3  
MIR675  
CDKL1  
GOLGA8F  
CATSPER2  
KLHL36  
FAM99B  
DCAF5

JMJD7  
LEO1  
FBXO31  
LOC100133161  
ALKBH1  
PLA2G4B  
PLA2G4E  
ESRP2  
MRPL23-AS1  
EIF2B2  
ULK4P2  
TRIM69  
CENPT  
MIR4298  
AP1G2  
LOC100288615  
C15orf43  
C16orf70  
MIR210HG  
SLC7A7  
LOC100288637  
LOC145663  
CYB5B  
MIR4686  
MTA1  
LOC100289656  
FAM81A  
CMIP  
MIR4687  
NEMF  
MIR1233-1  
GCOM1  
GFOD2  
PNMA1  
MIR1282  
LOC145783  
CDT1  
RPS6KA5  
MIR1233-2  
FLJ27352  
MAP1LC3B  
TRIP11  
MIR4310  
LOC145845  
PMFBP1  
CPNE6  
MIR3942

TMCO5A  
DYNLRB2  
NRXN3  
LOC100505648  
ZSCAN29  
HSDL1  
AKAP6  
LOC100507466  
TTBK2  
CRISPLD2  
AKAP5  
SERF2-C15ORF63  
CDAN1  
C16orf48  
SPTLC2  
MIR4509-1  
STRC  
SLC7A6OS  
BAG5  
MIR4509-2  
DYX1C1  
COG8  
C14orf2  
MIR4510  
CSNK1A1P1  
SPIRE2  
CDC42BPB  
MIR4509-3  
OTUD7A  
ZNF469  
TCL1B  
TMCO5B  
SPRED1  
B3GNT9  
RGS6  
PGBD4  
CIRH1A  
KIAA0391  
ADAL  
ZNRF1  
KIAA0247  
EXD1  
CNTNAP4  
KIAA0586  
FSIP1  
MARVELD3  
DLGAP5

RHOV  
MTSS1L  
KIAA0125  
C15orf33  
CENPBD1  
KIAA0317  
UBR1  
ZNF276  
TOX4  
PATL2  
KCNG4  
TECPR2  
LPCAT4  
SDR42E1  
GOLGA5  
PLA2G4F  
CMTM1  
REC8  
LRRC57  
PKD1L2  
MED6  
LYSMD2  
RNF166  
PARP2  
C15orf55  
EXOSC6  
CNIH  
WDR72  
C16orf46  
DHRS2  
HMGN2P46  
DNAAF1  
GPHN  
SLC24A5  
NRN1L  
EFS  
PRTG  
CMTM3  
IRF9  
LOC283663  
SPATA2L  
PRMT5  
LOC283710  
C16orf55  
SEC23A  
FAM98B  
ZC3H18

VTI1B  
PLA2G4D  
CDYL2  
FBLN5  
GOLGA8G  
TMEM170A  
BATF  
GLDN  
SLC38A8  
TM9SF1  
FMN1  
ZFP90  
SIVA1  
MRPL42P5  
RLTPR  
NPC2  
USP50  
KCTD19  
AHSA1  
TEX9  
CMTM4  
EXOC5  
C15orf52  
CMTM2  
CGRRF1  
TNFAIP8L3  
BEAN1  
CYP46A1  
SHC4  
SLC22A31  
EDDM3A  
CTXN2  
IL34  
DHRS4  
C15orf53  
TMED6  
PAPOLA  
C15orf54  
FLJ30679  
ACOT2  
DUOXA2  
LOC146513  
TMED10  
MIR211  
ZFPM1  
FERMT2  
HERC2P9

ADAD2  
RIPK3  
WHAMMP2  
ZFP1  
PTPN21  
GOLGA8B  
ADAMTS18  
AP4S1  
EIF2AK4  
MGC23284  
C14orf1  
CATSPER2P1  
LINC00311  
WDHD1  
UNC13C  
LDHD  
BAZ1A  
CKMT1A  
FUK  
MAP4K5  
SERINC4  
MLKL  
SUPT16H  
C15orf62  
ZNF778  
NID2  
C15orf56  
ACSF3  
VASH1  
PHGR1  
CCDC79  
ATG14  
LOC645212  
CES4A  
ZBTB1  
LOC646278  
EXOC3L1  
SNW1  
LOC653075  
LINC00304  
ACIN1  
HSP90AB4P  
LOC283867  
PCNX  
MIR626  
HTA  
DAAM1

MIR627  
LOC283922  
SAMD4A  
MIR628  
NUDT7  
TTLL5  
ANP32AP1  
PDXDC2P  
FAM179B  
LOC728758  
CLEC18C  
RCOR1  
OIP5-AS1  
SNAI3  
SYNE2  
MIR147B  
FAM92B  
PACS2  
LOC100129387  
ATXN1L  
SCFD1  
LOC100131089  
PKD1L3  
KHNYN  
ANKRD63  
CLEC18A  
ANGEL1  
GOLGA8F  
CTU2  
PPP1R13B  
LOC100132724  
C16orf86  
DICER1  
JMJD7  
PABPN1L  
SLC7A8  
PLA2G4B  
LOC400548  
ZFYVE26  
ULK4P2  
LOC400550  
TTC9  
LOC100288615  
LOC400558  
KLHDC2  
LOC100288637  
C16orf74

FLRT2  
LOC100289656  
MIR140  
HECTD1  
MIR1233-1  
CTRB2  
HEATR5A  
MIR1266  
MIR328  
NGDN  
MIR1282  
CLEC18B  
LRP10  
LOC100306975  
SNORD68  
PLEKHG3  
MIR2116  
KIAA0895L  
SIPA1L1  
MIR1233-2  
SNORD71  
DCAF4  
MIR4310  
SNORD111  
KIF26A  
MIR3942  
LOC727710  
C14orf109  
LOC100505648  
LOC729513  
NKX2-8  
LOC100507466  
LOC732275  
TNF2  
SERF2-C15ORF63  
SNORD111B  
PLEK2  
DYX1C1-CCPG1  
LOC100128881  
TIMM9  
MIR4509-1  
LOC100129617  
OR10G3  
MIR4509-2  
LOC100130015  
OR10G2  
MIR4510

LOC100130894  
OR4E2  
MIR4716  
SYCE1L  
TCL6  
MIR4713  
LOC100287036  
MLH3  
MIR4509-3  
MIR1538  
ATP5S  
MIR4712  
MIR1972-1  
KCNH5  
TMC05B  
MIR1910  
CIDEB  
MYZAP  
SNORA70D  
PRO1768  
MIR3182  
CHMP4A  
MIR1972-2  
STXBP6  
LOC100505865  
GPR132  
LOC100506083  
POMT2  
LOC100506172  
STRN3  
C16orf95  
SLC39A2  
CKLF-CMTM1  
ERO1L  
MIR4720  
COQ6  
MIR4722  
FAM158A  
MIR4719  
ATL1  
FCF1  
RDH11  
SERPINA10  
NIN  
GLRX5  
ZNF219  
COX16

GMPR2  
SLC22A17  
DACT1  
ATP6V1D  
EVL  
C14orf129  
JKAMP  
CINP  
MBIP  
DHRS7  
C14orf166  
ASB2  
SIX4  
ZFYVE1  
CPSF2  
KCNK10  
GNG2  
KLHL28  
C14orf101  
HAUS4  
PPP2R3C  
PRPF39  
C14orf119  
FBXO34  
CDCA4  
C14orf102  
RNF31  
ATG2B  
RBM23  
UBR7  
DNAAF2  
C14orf105  
EXD2  
VRTN  
MIS18BP1  
SYNJ2BP  
SLC39A9  
MEG3  
C14orf167  
G2E3  
FLVCR2  
OSGEP  
C14orf118  
SMEK1  
ARHGEF40  
BTBD7  
MUDENG

TDP1  
ZNF839  
SPATA7  
EAPP  
ACTR10  
YLPM1  
METTL3  
LTB4R2  
KCNK13  
C14orf162  
SDR39U1  
C14orf132  
DDX24  
RPGRIP1  
ADCK1  
TMEM63C  
PELI2  
RHOJ  
NDRG2  
GALNTL1  
PLEKHH1  
NYNRIN  
TXNDC16  
TRMT5  
UNC79  
HOMEZ  
BEGAIN  
CHD8  
FANCM  
PPP4R4  
CCNB1IP1  
ZNF410  
NGB  
RBM25  
SNX6  
SAV1  
C14orf93  
ABHD4  
C14orf133  
NPAS3  
SMOC1  
MOAP1  
DIO3OS  
EDDM3B  
IRF2BPL  
MPP5  
CDH24

INF2  
C14orf135  
GPR135  
METTL17  
IL25  
GNPNAT1  
BCL11B  
OTUB2  
ZFYVE21  
MEG8  
THTPA  
OR4K5  
OR11H2  
WDR25  
OR4K1  
METTL21D  
LINC00341  
ZC2HC1C  
C14orf169  
IPO4  
CLMN  
CATSPERB  
ZC3H14  
RIN3  
L2HGDH  
C14orf159  
C14orf45  
NUBPL  
DCAF11  
TMEM121  
DDHD1  
OR4K15  
SGPP1  
TMX1  
AMN  
SLIRP  
DNAL1  
RPS6KL1  
SYT16  
IFI27L2  
FSCB  
SETD3  
BRMS1L  
APOPT1  
HHIPL1  
JPH4  
C14orf142

RNASE7  
INSM2  
ARHGAP5-AS1  
RAB2B  
AJUBA  
STON2  
ZFHX2  
KIAA1737  
RPPH1  
SLC25A21  
PAPLN  
FAM181A  
BTBD6  
EFCAB11  
LRRC16B  
PPP1R3E  
TMEM55B  
CHURC1  
C14orf43  
LIN52  
NEK9  
EXOC3L4  
WDR20  
TTC5  
MAPK1IP1L  
EGLN3  
C14orf126  
IFT43  
WDR89  
C14orf149  
AHNAK2  
TRIM9  
TRMT61A  
DHRS1  
CMTM5  
MIA2  
TDRD9  
ANKRD9  
AK7  
IFI27L1  
C14orf28  
TRAPPC6B  
C14orf79  
PLD4  
ADSSL1  
RNASE11  
TPPP2

RNASE8  
MRPL52  
PSMB11  
OR4K14  
OR4L1  
OR11H6  
LRR1  
KLHDC1  
FRMD6  
SOCS4  
NAA30  
GPHB5  
NOXRED1  
JDP2  
ISCA2  
ACOT4  
TTC8  
TC2N  
SLC24A4  
SLC25A29  
DEGS2  
KLHL33  
RPL10L  
LINC00239  
LOC145216  
RDH12  
ADAM21P1  
GSC  
SERPINA12  
PRIMA1  
MIPOL1  
PPP1R36  
SLC38A6  
C14orf37  
FRMD6-AS1  
ABHD12B  
LOC145474  
PTGR2  
FAM161B  
C14orf166B  
ISM2  
CEP128  
MDP1  
TTC7B  
LRFN5  
FAM71D  
TMEM229B

C14orf49  
CLEC14A  
FITM1  
REM2  
TMEM30B  
MDGA2  
SAMD15  
C14orf21  
EML5  
SPTSSA  
MGC23270  
ADCY4  
C14orf183  
RALGAPA1  
SFTA3  
FBXO33  
NUDT14  
LINC00521  
SERPINA11  
IGBP1P1  
LOC283547  
C14orf182  
LOC283553  
GPR137C  
PROX2  
ZDHHC22  
TMED8  
C14orf178  
LOC283585  
LOC283587  
FAM181A-AS1  
SNHG10  
C14orf177  
SLC25A47  
LINC00523  
LOC283624  
TSSK4  
FAM177A1  
KIAA0284  
C14orf80  
DHRS4L2  
C14orf55  
C14orf39  
CCDC85C  
ITPK1-AS1  
SNORD8  
SNORD56B

SERPINA9  
LINC00226  
LINC00221  
RNASE10  
VSX2  
OR6S1  
SLC35F4  
COX8C  
ASPG  
RAB15  
FLJ31306  
TBPL2  
C14orf23  
TOMM20L  
SERPINA13  
C14orf64  
RTL1  
TMEM179  
OR4N2  
OR4K2  
OR4K13  
OR4K17  
OR4N5  
OR11G2  
OR11H4  
RNASE9  
OR5AU1  
HEATR4  
FLJ22447  
PLEKHD1  
LOC400236  
LOC400238  
DICER1-AS1  
C14orf180  
POTEG  
MIR127  
MIR134  
MIR136  
MIR154  
MIR203  
MIR208A  
MIR299  
C14orf165  
OR11H12  
RNASE13  
LINC00238  
CCDC88C

OR4Q3  
OR4M1  
TEX21P  
MIR323A  
MIR337  
MIR345  
MIR376C  
MIR369  
RNASE12  
MIR376A1  
MIR377  
MIR379  
MIR380  
MIR381  
MIR382  
MIR433  
MIR431  
MIR329-1  
MIR329-2  
MIR323B  
MIR409  
MIR412  
MIR410  
MIR376B  
MIR485  
MIR493  
MIR432  
MIR494  
MIR495  
MIR496  
MIR487A  
ACOT1  
ACOT6  
POTEM  
LOC642426  
ECRP  
C14orf176  
CBLN3  
LOC645431  
RPL13AP3  
LINC00520  
FLJ43390  
SYNDIG1L  
TEX22  
MIR539  
MIR376A2  
MIR487B

SCARNA13  
SNORA28  
SNORA79  
SNORD9  
MIR411  
MIR624  
MIR654  
MIR655  
MIR656  
DHRS4L1  
C14orf38  
LOC731223  
SNORD113-1  
SNORD113-2  
SNORD113-4  
SNORD113-5  
SNORD113-6  
SNORD113-7  
SNORD113-9  
SNORD114-1  
SNORD114-2  
SNORD114-3  
SNORD114-4  
SNORD114-5  
SNORD114-6  
SNORD114-7  
SNORD114-8  
SNORD114-9  
SNORD114-10  
SNORD114-11  
SNORD114-12  
SNORD114-13  
SNORD114-14  
SNORD114-15  
SNORD114-16  
SNORD114-17  
SNORD114-18  
SNORD114-19  
SNORD114-20  
SNORD114-21  
SNORD114-22  
SNORD114-23  
SNORD114-24  
SNORD114-25  
SNORD114-26  
SNORD114-27  
SNORD114-28

SNORD114-29  
SNORD114-30  
SNORD114-31  
MIR758  
MIR668  
MIR770  
SNORD127  
SNORD126  
SNORA11B  
MIR300  
MIR541  
MIR665  
MIR543  
MIR208B  
MIR889  
ZBTB42  
KTN1-AS1  
LOC100129345  
LOC100129794  
LOC100131366  
LOC100288846  
LOC100289511  
MIR1247  
MIR1185-1  
MIR1185-2  
MIR1260A  
MIR1197  
OTX2OS1  
MIR1193  
MIR4309  
MIR3173  
MIR4308  
MIR4307  
MIR548Y  
LOC100505967  
LOC100506071  
LOC100506321  
LOC100506433  
LOC100507043  
NEDD8-MDP1  
BCL2L2-PABPN1  
SYNJ2BP-COX16  
CHURC1-FNTB  
MIR4505  
MIR3545  
MIR4708  
MIR4709

MIR4503  
MIR4710  
MIR548AI  
MIR4707  
MIR4706  
MIR2392  
LOC100628307  
HIF1A-AS2

















































































| KIRP           |           | PAAD          |           |     |            | PC            |           |             |
|----------------|-----------|---------------|-----------|-----|------------|---------------|-----------|-------------|
| Type A         | Subtype B |               | Subtype A |     | Subtype B  |               | Subtype A |             |
| Del            | Amp       | Del           | Amp       | Del | Amp        | Del           | Amp       | Del         |
| hsa-mir-551a   |           | CDKN2A        |           |     | [GATA6]    | CDKN2A        | MAML3     | NF1         |
| LINC00290      |           | hsa-mir-3133  |           |     | [PCAT1]    | SMAD4         | SLC4A1    | MAN1A2      |
| hsa-mir-4301   |           | hsa-mir-1976  |           |     | RPS16      | SFN           | S100A1    | hsa-mir-320 |
| hsa-mir-1910   |           | DDX10         |           |     | RUSC2      | hsa-mir-14    | UBTF      | RBMS3       |
| CDKN2A         |           | CRIP1         |           |     | TRRAP      | hsa-mir-74    | S100A2    | hsa-mir-551 |
| hsa-mir-3133   |           | LRP1B         |           |     | NOTCH2     | XRCC4         | RUNDC3A   | NAALADL2    |
| hsa-mir-637    |           | hsa-mir-1303  |           |     | ERBB2      | ACR           | S100A3    | hsa-mir-429 |
| hsa-mir-3201   |           | hsa-mir-4273  |           |     | hsa-mir-12 | FOXF2         | S100A4    | hsa-mir-130 |
| hsa-mir-133b   |           | hsa-mir-1913  |           |     | BCAT1      | ARHGAP8       | S100A5    | ATP1B2      |
| hsa-mir-3171   |           | hsa-mir-147b  |           |     | BAG4       | TMEM132C      | S100A6    | PTPRD       |
| LRP1B          |           | hsa-mir-548g  |           |     | SLC47A1    | ANG           | S100A13   | FUT9        |
| hsa-mir-605    |           | hsa-mir-1234  |           |     | hsa-mir-57 | hsa-mir-59    | CHTOP     | hsa-mir-340 |
| ADARB1         |           | CDKN2B        |           |     | SLC26A8    | hsa-mir-131   | S100A14   | MMRN1       |
| hsa-mir-4251   |           | hsa-mir-149   |           |     | PLK1S1     | hsa-mir-43    | S100A16   | hsa-mir-321 |
| hsa-mir-34c    |           | hsa-mir-3115  |           |     | ZMAT4      | SMARCA4       |           | hsa-mir-311 |
| hsa-mir-3182   |           | EXPH5         |           |     | hsa-mir-14 | hsa-mir-302e  |           | hsa-mir-121 |
| CDKN2B         |           | CRIP2         |           |     | MECOM      | CLEC3A        |           | hsa-mir-211 |
| hsa-mir-149    |           | hsa-mir-3141  |           |     | COL4A4     | hsa-mir-147b  |           | OMG         |
| DAPK3          |           | hsa-mir-1324  |           |     | SUPT5H     | ADARB2        |           | FAM19A5     |
| ACR            |           | hsa-mir-1202  |           |     | UNC13B     | hsa-mir-1274b |           | hsa-mir-421 |
| CRISP1         |           | hsa-mir-1282  |           |     | ARPC1B     | hsa-mir-548x  |           | MIR4789     |
| hsa-mir-4307   |           | hsa-mir-3139  |           |     | GRB7       | AJAP1         |           | hsa-mir-301 |
| LOC647012      |           | hsa-mir-939   |           |     | CPM        | LPAR6         |           | hsa-mir-421 |
| PRKG1          |           | MTAP          |           |     | LRMP       | PARK2         |           | CD68        |
| PTTG1IP        |           | hsa-mir-4269  |           |     | DDHD2      | LIPF          |           | C9orf123    |
| hsa-mir-429    |           | hsa-mir-4253  |           |     | SNORA59B   | hsa-mir-3133  |           | hsa-mir-121 |
| ACAT1          |           | KDELC2        |           |     | ATP5I      | COL15A1       |           | FAM190A     |
| AFG3L1P        |           | ELK2AP        |           |     | C1R        | C9orf53       |           | hsa-mir-131 |
| MTAP           |           | hsa-mir-1294  |           |     | CLDN11     | ARID1A        |           | hsa-mir-311 |
| hsa-mir-4269   |           | hsa-mir-1284  |           |     | ACSL3      | LPO           |           | hsa-mir-541 |
| EEF2           |           | hsa-mir-1273c |           |     | ZFP36      | MAP2K4        |           | hsa-mir-291 |
| ARSA           |           | hsa-mir-627   |           |     | ATP8B5P    | SCARNA18      |           | MIR4733     |
| GCLC           |           | LRBA          |           |     | ARPC1A     | ARSA          |           | LOC284933   |
| hsa-mir-208b   |           | hsa-mir-661   |           |     | NEUROD2    | FOXC1         |           | hsa-mir-421 |
| CSTF2T         |           | C9orf53       |           |     | IFNG       | PRR5          |           | hsa-mir-481 |
| COL6A1         |           | AGXT          |           |     | C12orf77   | FLJ37505      |           | hsa-mir-541 |
| hsa-mir-1302-2 |           | hsa-mir-1256  |           |     | SNORA59A   | HNRNPC        |           | EFNB3       |
| APOA1          |           | BRF1          |           |     | CTBP1      | hsa-mir-153-2 |           | hsa-mir-421 |
| APRT           |           | hsa-mir-378   |           |     | C1S        | hsa-mir-4276  |           | hsa-mir-311 |
| C9orf53        |           | hsa-mir-3136  |           |     | PRKCI      | hsa-mir-1909  |           | hsa-mir-151 |
| hsa-mir-562    |           | hsa-mir-3145  |           |     | IRS1       | C19orf52      |           | hsa-mir-541 |
| SNORD37        |           | hsa-mir-4310  |           |     | GMFG       | hsa-mir-483   |           | hsa-mir-631 |
| CHKB           |           | CLGN          |           |     | FAM166B    | WWOX          |           | MIR3201     |

|                |                |          |                 |             |
|----------------|----------------|----------|-----------------|-------------|
| GSTA1          | hsa-mir-937    | SMURF1   | hsa-mir-1282    | hsa-mir-131 |
| hsa-mir-1201   | CDKN2B-AS1     | PNMT     | KLF6            | hsa-mir-671 |
| MIR605         | KIF1A          | LYZ      | hsa-mir-935     | hsa-mir-191 |
| COL6A2         | hsa-mir-1290   | DGKQ     | hsa-mir-125b-2  | EIF4A1      |
| CDK11B         | JAG2           | CACNA1C  | MIR4417         | hsa-mir-127 |
| APOA4          | hsa-mir-145    | SKIL     | RNLS            | ADCY7       |
| C16orf3        | hsa-mir-4272   | PAX3     | hsa-mir-149     | hsa-mir-111 |
| CDKN2B-AS1     | hsa-mir-548a-2 | PAF1     | TGFBR1          | hsa-mir-191 |
| hsa-mir-1471   | hsa-mir-626    | MYH16    | PIGV            | hsa-mir-361 |
| PIAS4          | EDNRA          | TCAP     | MPO             | MIR4535     |
| CPT1B          | hsa-mir-1302-7 | MDM2     | MIR744          | CDK11B      |
| GSTA2          | BOK            | FGFR3    | CHKB            | hsa-mir-421 |
| ANG            | hsa-mir-1273d  | CCND2    | FOXQ1           | hsa-mir-314 |
| PRMT2          | ADAM6          | TERC     | PRR5-ARHGAP8    | SHBG        |
| DFFB           | hsa-mir-584    | SERPINE2 | MIR3612         | hsa-mir-581 |
| APOC3          | hsa-mir-135a-1 | SAMD4B   | RNASE1          | AGRP        |
| CA5A           | hsa-mir-588    | TMEM130  | hsa-mir-671     | ACTA1       |
| hsa-mir-1244-1 | hsa-mir-1233-2 | STARD3   | hsa-mir-548t    | hsa-mir-561 |
| MIR637         | ELF2           | CNOT2    | hsa-mir-3187    | ACACA       |
| TYMP           | hsa-mir-151    | GAK      | hsa-mir-675     | DFFB        |
| GSTA3          | COL6A3         | CD4      | hsa-mir-627     | hsa-mir-211 |
| APEX1          | hsa-mir-34a    | SEC62    | IDI1            | AGA         |
| ITGB2          | MTA1           | SCG2     | hsa-mir-373     | SOX15       |
| DVL1           | hsa-mir-874    | MED29    | hsa-let-7c      | hsa-mir-211 |
| ARCN1          | hsa-mir-566    | KPNA7    | ANKRD22         | AMFR        |
| CBFA2T3        | hsa-mir-3144   | IKZF3    | hsa-mir-4269    | ACTN2       |
| hsa-mir-4268   | hsa-mir-1233-1 | PTPRB    | GALNT12         | hsa-mir-561 |
| MAPK11         | GAB1           | IDUA     | ZDHHC18         | ACCN1       |
| GSTA4          | hsa-mir-30d    | CD9      | SEPT4           | DVL1        |
| BCL2L2         | DTYMK          | GPR160   | CPT1B           | ADM         |
| LSS            | hsa-mir-4252   | CUL3     | RNASE2          | SLC25A4     |
| MEGF6          | KIAA0125       | PLEKHG2  | hsa-mir-1975    | TP53        |
| ATM            | hsa-mir-886    | MIR3609  | hsa-mir-1979    | hsa-mir-101 |
| CDH13          | hsa-mir-4271   | PPP1R1B  | hsa-mir-1302-11 | BBS2        |
| hsa-mir-3132   | hsa-mir-548b   | RAP1B    | hsa-mir-4298    | ADSS        |
| MAPK12         | hsa-mir-211    | LETM1    | hsa-mir-4310    | hsa-mir-421 |
| HCRTR2         | GYPA           | CD27     | PFKP            | ACLY        |
| CEBPE          | hsa-mir-1208   | MYNN     | hsa-mir-1283-2  | MEGF6       |
| PCNT           | GBX2           | FARSB    | hsa-mir-3118-5  | AP2A2       |
| GABRD          | hsa-mir-551a   | MIR4530  | LIPJ            | ANXA2P1     |
| FXD2           | PACS2          | MIEN1    | hsa-mir-562     | FXR2        |
| CDH15          | hsa-mir-1289-2 | YEATS4   | ALG2            | hsa-mir-141 |
| hsa-mir-153-1  | hsa-mir-191    | MYL5     | SRSF1           | CA7         |
| SBF1           | hsa-mir-587    | CHD4     | TYMP            | AGT         |
| IL17A          | hsa-mir-1268   | SLC7A14  | RNASE3          | hsa-mir-131 |
| CMA1           | GYPB           | KCNE4    | hsa-mir-548f-4  | AP2B1       |
| S100B          | hsa-mir-1207   | PGAP3    | AGA             | GABRD       |

|                |                |           |                |             |
|----------------|----------------|-----------|----------------|-------------|
| GNB1           | GPC1           | CCT2      | AMH            | AMPD3       |
| CXCR5          | hsa-mir-4251   | PDE6B     | hsa-mir-210    | CASP3       |
| COX4I1         | GPR132         | ATN1      | hsa-mir-626    | MPDU1       |
| hsa-mir-3131   | hsa-mir-1244-2 | LRRC31    | PITRM1         | hsa-mir-314 |
| PPP6R2         | hsa-mir-711    | DOCK10    | hsa-mir-643    | CBFB        |
| MCM3           | hsa-mir-2113   | MIR4728   | hsa-mir-3156-3 | ARF1        |
| LTB4R          | hsa-mir-3118-6 | FRS2      | LIPM           | hsa-mir-124 |
| SLC19A1        | GYPE           | WHSC1     | hsa-mir-1471   | AOC2        |
| PEX10          | hsa-mir-1205   | ENO2      | ANKS6          | GNB1        |
| CASP1          | GPR35          | PHC3      | SUPT4H1        | APBB1       |
| CYBA           | hsa-mir-429    | WDFY1     | MAPK11         | CLCN3       |
| hsa-mir-26b    | TMEM121        | CPSF6     | RNASE4         | SNORA67     |
| ZBED4          | hsa-mir-548f-3 | ZNF141    | hsa-mir-490    | hsa-mir-131 |
| MUT            | hsa-mir-2115   | FGF6      | SLC25A4        | CBLN1       |
| CTSG           | hsa-mir-4282   | ARPM1     | ATP5D          | CHML        |
| MCM3AP         | hsa-mir-3118-4 | NYAP2     | AP2A2          | hsa-mir-312 |
| PRKCZ          | IL15           | KCNMB4    | hsa-mir-1233-2 | ARL4D       |
| CASP4          | hsa-mir-1204   | SLBP      | ZMYND11        | PEX10       |
| DPEP1          | HDLBP          | FKBP4     | hsa-mir-125a   | RHOG        |
| hsa-mir-548f-2 | hsa-mir-1302-2 | LRRC34    | BAGE           | CPE         |
| SCO2           | BTBD6          | MRPL44    | LIPK           | WRAP53      |
| PGK2           | hsa-mir-548p   | IL22      | hsa-mir-1244-1 | hsa-mir-313 |
| DAD1           | hsa-mir-1226   | MAEA      | VEZF1          | CDH5        |
| FTCD           | hsa-mir-30a    | FOXM1     | MAPK12         | LYST        |
| SCNN1D         | ACTC1          | LRRIQ4    | RNASE6         | hsa-mir-425 |
| CASP5          | SMAD1          | FAM124B   | hsa-mir-29b-1  | ATP6V0A1    |
| FANCA          | hsa-mir-548d-1 | SLC35E3   | CASP3          | PRKCZ       |
| hsa-mir-1302-4 | NDUFA10        | PCGF3     | AZU1           | ART1        |
| RABL2B         | ALPL           | GAPDH     | APBB1          | CTSO        |
| PKHD1          | NUDT14         | SAMD7     | hsa-mir-1233-1 | SAT2        |
| FOXG1          | hsa-mir-583    | RHBDD1    | WDR37          | hsa-mir-124 |
| DIP2A          | hsa-mir-564    | IL26      | hsa-mir-150    | CDH8        |
| SKI            | hsa-mir-30c-2  | SPON2     | CXADR          | CHRM3       |
| CD3D           | APBA2          | GNB3      | LIPN           | hsa-mir-131 |
| FOXF1          | MGST2          | LOC100128 | hsa-mir-4268   | BRCA1       |
| hsa-mir-2355   | hsa-mir-2053   | MOGAT1    | EPX            | SCNN1D      |
| MLC1           | SEPT2          | MDM1      | SBF1           | ASCL2       |
| RHAG           | RERE           | TACC3     | SALL2          | DCTD        |
| GZMH           | C14orf80       | KCNA1     | hsa-mir-335    | SNORA48     |
| POFUT2         | ADRB2          | AP1S3     | CLCN3          | hsa-mir-374 |
| TP73           | hsa-mir-138-1  | NUP107    | HCN2           | CDH11       |
| CD3E           | hsa-mir-548u   | CPLX1     | RHOG           | FH          |
| FOXL1          | B2M            | KCNA5     | hsa-mir-211    | ACY1        |
| hsa-mir-3130-4 | NR3C2          | SGPP2     | DIP2C          | CACNB1      |
| MAPK8IP2       | hsa-mir-548a-3 | RAB3IP    | hsa-mir-4324   | SKI         |
| TFAP2B         | PDCD1          | SLC26A1   | NCAM2          | CARS        |
| GZMB           | C1QA           | KCNA6     | hsa-mir-3132   | ETFDH       |

|          |               |           |                |             |
|----------|---------------|-----------|----------------|-------------|
| PCBP3    | LINC00226     | CCDC140   | MTMR4          | SNORD10     |
| TNFRSF4  | ANXA6         | BEST3     | PPP6R2         | hsa-mir-141 |
| CD3G     | ACVR2B        | FGFRL1    | TOX4           | CDH16       |
| FOXC2    | hsa-mir-133b  | LAG3      | hsa-mir-183    | GALNT2      |
| AAMP     | NBEAP1        | LOC646736 | CPE            | ADCY5       |
| PLXNB2   | NDUFC1        | LRRC10    | BSG            | CDC6        |
| CRISP2   | hsa-mir-3151  | PIGG      | ART1           | TP73        |
| HNRNPC   | PPP1R7        | LTBR      | hsa-mir-1268   | CCKBR       |
| C21orf58 | C1QB          | MIR4439   | LARP4B         | F11         |
| MMP23B   | LINC00221     | MIR1279   | hsa-mir-220c   | hsa-mir-584 |
| CRYAB    | APC           | KIAA1530  | TMPRSS15       | CES1        |
| GALNS    | ACY1          | NDUFA9    | hsa-mir-153-1  | GNG4        |
| ACADL    | hsa-mir-586   | SNORA70G  | BZRAP1         | ADPRH       |
| BRD1     | BUB1B         | ABCA11P   | ZBED4          | CCR7        |
| GCM1     | POU4F2        | NINJ2     | EDDM3A         | TNFRSF4     |
| MMP14    | hsa-mir-1273  | MIR3913-2 | hsa-mir-129-1  | CD81        |
| YBEY     | SPP2          | MFSD7     | DCTD           | ACSL1       |
| MMP23A   | C1QC          | NOP2      | CDC34          | hsa-mir-874 |
| DDX6     | TEX22         | MIR3913-1 | ASCL2          | CETP        |
| GAS8     | ATOX1         | TMEM175   | hsa-mir-3118-6 | GUK1        |
| AGXT     | ALAS1         | NTF3      | GTPBP4         | ALAS1       |
| FAM19A5  | hsa-mir-1275  | LOC100507 | hsa-mir-3191   | CNP         |
| TRAM2    | CAPN3         | C4orf42   | HSPA13         | MMP23B      |
| MYH6     | ABCE1         | PTMS      | hsa-mir-3131   | CD151       |
| COL18A1  | hsa-mir-875   | TMEM129   | OR4D1          | FAT1        |
| TNFRSF14 | PER2          | PTPN6     | SCO2           | hsa-mir-881 |
| DDX10    | CA6           | ZNF595    | SUPT16H        | CNGB1       |
| GCSH     | ALDH7A1       | PEX5      | hsa-mir-593    | HNRNPU      |
| ALPI     | AMT           | FAM53A    | ETFDH          | ALCAM       |
| NCAPH2   | hsa-mir-219-1 | RAD52     | CIRBP          | CSF3        |
| CRISP3   | CHRM5         | ZNF721    | CARS           | MMP23A      |
| MYH7     | RPS3A         | KDM5A     | hsa-mir-3118-4 | CDKN1C      |
| C21orf56 | hsa-mir-3150  | ZNF718    | IDI2-AS1       | FGA         |
| TNFRSF18 | LRRFIP1       | SCNN1A    | hsa-mir-320e   | hsa-mir-121 |
| DLAT     | CAPZB         | CRIPAK    | TPTE           | CSNK2A2     |
| HSBP1    | CAMK4         | SLC6A12   | hsa-mir-26b    | KCNK1       |
| ALPP     | APEH          | RNF212    | RNF43          | ARF4        |
| MOV10L1  | hsa-mir-1236  | SLC6A13   | RABL2B         | DHX8        |
| ICK      | CHRNA7        | ZNF876P   | OR10G3         | TNFRSF14    |
| NEDD8    | UCP1          | VAMP1     | hsa-mir-592    | TPP1        |
| C21orf67 | hsa-mir-3149  | ZNF732    | F11            | FGB         |
| ISG15    | HDAC4         | TEAD4     | CNN2           | hsa-mir-124 |
| DRD2     | CASP9         | LOC100125 | CCKBR          | CTRL        |
| HSD17B2  | CAMK2A        | TNFRSF1A  | ACTC1          | LGALS8      |
| ALPPL2   | ARF4          | LOC100130 | IDI2           | ATP6V1A     |
| MIOX     | hsa-mir-877   | TPI1      | A1BG           | DUSP3       |
| CD2AP    | CKMT1B        | TMED11P   | NRIP1          | TNFRSF18    |

|             |                |          |                |                |
|-------------|----------------|----------|----------------|----------------|
| NFATC4      | SMARCA5        | TULP3    | hsa-mir-548f-2 | CNGA4          |
| FAM207A     | hsa-mir-2052   | VWF      | MKS1           | FGG            |
| PLCH2       | FARP2          | FGF23    | MLC1           | hsa-mir-548f-2 |
| FDX1        | RUNX3          | USP5     | OR10G2         | CYLD           |
| IRF8        | CAMLG          | MLF2     | ABP1           | MTR            |
| ATIC        | RHOA           | DYRK4    | ACSL1          | C3orf51        |
| PANX2       | hsa-mir-3143   | CD163    | CSNK1G2        | ERBB2          |
| FBXO9       | DUT            | CLSTN3   | CD81           | ISG15          |
| NOVA1       | INPP4B         | NCAPD2   | APBA2          | CTSD           |
| MCM3AP-AS1  | hsa-mir-124-2  | LPCAT3   | LOC282980      | FRG1           |
| CEP104      | ARL4C          | LRRC23   | AP2A1          | hsa-mir-548f-2 |
| GRIA4       | TNFRSF8        | EMG1     | BTG3           | DYNC1LI2       |
| MAF         | CAST           | LEPREL2  | hsa-mir-1302-4 | NID1           |
| KIF1A       | C3orf51        | AKAP3    | MSX2P1         | CACNA1D        |
| ALG12       | hsa-mir-548a-1 | RAD51AP1 | MAPK8IP2       | ETV4           |
| TNFRSF21    | EPB42          | TSPAN9   | OR4E2          | PLCH2          |
| PNP         | SNORD73A       | PHB2     | AKR1B1         | DRD4           |
| LINC00315   | hsa-mir-486    | ERC1     | FAT1           | GK3P           |
| SLC35E2     | RAMP1          | IFFO1    | CFD            | hsa-mir-548f-2 |
| GUCY1A2     | CDA            | GALNT8   | CD151          | E2F4           |
| MC1R        | CD14           | GPR162   | B2M            | RAB4A          |
| BARD1       | CACNA1D        | COPS7A   | LOC338588      | CASR           |
| CRELD2      | ABCF1          | ING4     | KLK3           | EZH1           |
| TINAG       | FBN1           | MRPL51   | USP25          | CEP104         |
| NRL         | ANAPC10        | C1RL     | hsa-mir-2355   | DUSP8          |
| LINC00162   | hsa-mir-3148   | TAPBP    | HSF5           | GLRB           |
| RER1        | STK25          | PLEKHG6  | PLXNB2         | hsa-mir-221    |
| HSPB2       | CDK11B         | ITFG2    | SLC39A2        | GNAO1          |
| MVD         | CD74           | PRMT8    | ARF5           | RGS7           |
| BCS1L       | SLC25A20       | PARP11   | FRG1           | CBLB           |
| ADM2        | ACAT2          | ANO2     | ARID3A         | GAST           |
| TMEM14A     | GABRA5         | C12orf4  | CDKN1C         | SLC35E2        |
| OXA1L       | MAB21L2        | C12orf5  | NBEAP1         | EIF4G2         |
| COL18A1-AS1 | hsa-mir-4288   | LPAR5    | TUBB8          | GPM6A          |
| NOC2L       | COPS8          | WNK1     | BAX            | hsa-mir-9-2    |
| HTR3A       | CDC42          | ADIPOR2  | RBM11          | GOT2           |
| CHMP1A      | CDC25C         | WNT5B    | hsa-mir-3130-4 | RYR2           |
| BMPR2       | CAMP           | CDCA3    | OR4D2          | CD80           |
| TRABD       | CRISP1         | C12orf32 | BRD1           | FZD2           |
| HMGCLL1     | GABRB3         | NRIP2    | ZNF219         | RER1           |
| PCK2        | LSM6           | RBP5     | OPN1SW         | HBB            |
| LOC642852   | hsa-mir-4287   | CCDC77   | GK3P           | GRIA2          |
| OR4F3       | CAPN10         | ACRBP    | EFNA2          | hsa-mir-4287   |
| IL10RA      | CD52           | SPSB2    | TPP1           | HSD11B2        |
| PLCG2       | CDO1           | EFCAB4B  | BUB1B          | TARBP1         |
| BOK         | CCK            | CACNA2D4 | LINC00200      | CD86           |
| SELO        | AGER           | C12orf57 | BCAT2          | G6PC           |

|              |                |           |              |             |
|--------------|----------------|-----------|--------------|-------------|
| CENPQ        | GABRG3         | FBXL14    | CHODL-AS1    | NOC2L       |
| PSMB5        | TBC1D9         | ZNF384    | AAMP         | HBBP1       |
| LINC00163    | hsa-mir-548h-4 | DSTNP2    | DYNLL2       | GUCY1A3     |
| ARHGEF16     | PASK           | C12orf53  | NCAPH2       | hsa-mir-58: |
| IL18         | RCC1           | DCP1B     | ARHGEF40     | HSF4        |
| RPL13        | CDX1           | MATL2963  | BPGM         | TBCE        |
| CASP8        | ENTPD3         | CD163L1   | GLRB         | CD47        |
| HDAC10       | AIF1           | RPL13P5   | ELANE        | KAT2A       |
| LRRC1        | GANC           | B4GALNT3  | CNGA4        | OR4F3       |
| PSME1        | SLC7A11        | LOC28344C | CAPN3        | HBD         |
| SSR4P1       | hsa-mir-320a   | ACSM4     | LOC399708    | GUCY1B3     |
| SSU72        | ATG4B          | MIR141    | C5AR1        | hsa-mir-44: |
| MLL          | CLCN6          | MIR200C   | C21orf15     | KIFC3       |
| SPG7         | CHD1           | IQSEC3    | ACADL        | GPR137B     |
| CASP10       | CDC25A         | LOC57453E | C17orf47     | CISH        |
| SHANK3       | AIM1           | LRTM2     | MOV10L1      | GFAP        |
| ELOVL5       | GATM           | SCARNA12  | METTL3       | ARHGEF16    |
| PSME2        | CCRN4L         | SCARNA11  | BRAF         | HBE1        |
| LOC100129027 | hsa-mir-548v   | FAM138D   | GPM6A        | HMGB2       |
| WRAP73       | SH3BP4         | LOC67865E | GAMT         | hsa-mir-58: |
| NCAM1        | CLCNKA         | SCARNA10  | CTSD         | LCAT        |
| GAN          | AP3S1          | LOC100271 | CHRM5        | TSNAX       |
| CD28         | CISH           | LOC10028E | C10orf108    | COL8A1      |
| TUBGCP6      | AMD1           | LOC100292 | CA11         | CCR10       |
| TFAP2D       | GCHFR          | MIR3649   | LINC00308    | SSU72       |
| RABGGTA      | ZNF330         | LOC100507 | AGXT         | HBG1        |
| LOC100505746 | hsa-mir-383    | LOC100652 | MIR142       | HPGD        |
| SDF4         | SNED1          |           | MIOX         | ADRA1B      |
| NNMT         | CLCNKB         |           | RPGRIP1      | MMP2        |
| SLC7A5       | CSF1R          |           | CALD1        | ZNF124      |
| CHRND        | CCR1           |           | GRIA2        | CPOX        |
| LOC90834     | ARG1           |           | GNG7         | GRB7        |
| PAQR8        | PDIA3          |           | DRD4         | WRAP73      |
| RNASE1       | PCDH18         |           | CHRNA7       | HBG2        |
| MXRA8        | hsa-mir-598    |           | ADARB2-AS1   | HSP90AA4F   |
| NPAT         | TRAF3IP1       |           | CALM3        | ADRB2       |
| CDK10        | CNR2           |           | C21orf91     | MMP15       |
| CHRNA7       | CSF2           |           | ALPI         | HIST3H3     |
| LMF2         | CCR3           |           | LOC100506779 | CSTA        |
| MLIP         | ATP6V1G2       |           | PANX2        | GRN         |
| RNASE2       | IPW            |           | NDRG2        | SDF4        |
| CPSF3L       | OTUD4          |           | CALU         | HPX         |
| PAFAH1B2     | hsa-mir-1322   |           | HMGB2        | ING2        |
| MBTPS1       | ANO7           |           | MKNK2        | ANXA6       |
| COL4A3       | CORT           |           | DUSP8        | MT1A        |
| KLHDC7B      | CSNK1A1        |           | CKMT1B       | GNPAT       |
| IL17F        | CCR5           |           | LOC100216001 | DNASE1L3    |

|            |                |              |          |
|------------|----------------|--------------|----------|
| RNASE3     | BAI3           | CD33         | HCRT     |
| C1orf159   | ITPKA          | SAMSN1       | MXRA8    |
| POU2AF1    | MAML3          | ALPP         | HRAS     |
| TAF1C      | hsa-mir-4286   | MIR4736      | IRF2     |
| COL4A4     | PRLH           | ALG12        | APC      |
| LOC284933  | DDOST          | CHD8         | MT1B     |
| EFHC1      | CSNK1G3        | CASP2        | KMO      |
| RNASE4     | CCR8           | HPGD         | DOCK3    |
| AURKAIP1   | BAK1           | GPX4         | HSD17B1  |
| PPP2R1B    | IVD            | HBB          | CPSF3L   |
| USP10      | TMEM184C       | EPB42        | IGF2     |
| COL6A3     | hsa-mir-124-1  | LOC100507034 | KLKB1    |
| RPL23AP82  | THAP4          | SIGLEC6      | TRIM23   |
| C6orf141   | DFFA           | BAGE5        | MT1E     |
| RNASE6     | CTNNA1         | ALPPL2       | EXO1     |
| MRPL20     | CCBP2          | CRELD2       | DRD3     |
| PTS        | BCKDHB         | EDDM3B       | IFI35    |
| C16orf7    | LTK            | CDK5         | C1orf159 |
| CPS1       | RNF150         | HSP90AA4P    | ILK      |
| C22orf34   | hsa-mir-597    | GZMM         | MTNR1A   |
| GSTA5      | ANKMY1         | HBBP1        | ARSB     |
| SALL2      | DFFB           | GABRA5       | MT1F     |
| ATAD3A     | DMXL1          | CD37         | GGPS1    |
| RDX        | COL7A1         | BAGE4        | DUSP7    |
| KIAA0513   | CFB            | ATIC         | IGFBP4   |
| CREB1      | MAP1A          | ADM2         | AURKAIP1 |
| CHKB-CPT1B | PCDH10         | METTL17      | INS      |
| OPN5       | hsa-mir-548i-3 | CHRM2        | NEK1     |
| TEP1       | SCLY           | ING2         | ATOX1    |
| PANK4      | DVL1           | GADD45B      | MT1G     |
| SCN2B      | DIAPH1         | HBD          | TOMM20   |
| PIEZO1     | CTNNB1         | GABRB3       | EPHA3    |
| CRYBA2     | PRDM1          | CGB          | ITGA2B   |
| IL17REL    | MEIS2          | BAGE3        | MRPL20   |
| GPR115     | SCOC           | KIF1A        | IRF7     |
| TGM1       | hsa-mir-596    | TRABD        | NPY1R    |
| TP73-AS1   | ASB1           | RNASE7       | ALDH7A1  |
| SCN4B      | E2F2           | CLCN1        | MT1H     |
| ATP2C2     | DPYSL3         | IRF2         | URB2     |
| CRYGA      | CX3CR1         | OAZ1         | FHIT     |
| FAM116B    | BMP5           | HBE1         | JUP      |
| FAM83B     | MFAP1          | GABRG3       | ATAD3A   |
| PABPN1     | HHIP           | AP2S1        | KCNQ1    |
| LRRC47     | NAT1           | BAGE2        | NPY2R    |
| SDHD       | UGT1A10        | BARD1        | BHMT     |
| CLEC3A     | ECE1           | SELO         | MT1JP    |
| CRYGB      | SLC26A2        | RAB2B        | CEP170   |

|              |          |              |          |
|--------------|----------|--------------|----------|
| PIM3         | CYP8B1   | CPA1         | FLNB     |
| GPR111       | BMP6     | KLKB1        | KRT9     |
| AP1G2        | TRPM1    | PALM         | PANK4    |
| HES4         | ARHGAP10 | HBG1         | LMO1     |
| SLN          | NAT2     | GANC         | NPY5R    |
| MPHOSPH6     | UGT1A8   | CRX          | BNIP1    |
| CRYGC        | MEGF6    | CHODL        | MT1M     |
| ODF3B        | HBEGF    | BCS1L        | AKT3     |
| DEFB110      | DAG1     | HDAC10       | GAP43    |
| SLC7A7       | DST      | TPPP2        | KRT10    |
| PRDM16       | NDN      | CPA2         | AJAP1    |
| TAGLN        | NAA15    | MTNR1A       | LSP1     |
| COX4NB       | ADCY8    | POLR2E       | PET112   |
| CRYGD        | UGT1A7   | HBG2         | BTF3     |
| SYCE3        | EPHA2    | GATM         | MT1L     |
| DEFB112      | EBF1     | DBP          | ZNF238   |
| CPNE6        | DNASE1L3 | ANKRD30BP2   | GATA2    |
| VWA1         | BTN1A1   | BMPR2        | KRT12    |
| UPK2         | OCA2     | SHANK3       | TP73-AS1 |
| TUBB3        | SETD7    | RNASE8       | MUC2     |
| CTLA4        | ADRA1A   | DPP6         | PLRG1    |
| LOC100128946 | UGT1A6   | NEK1         | CAMK4    |
| DEFB113      | ENO1     | POLRMT       | MT1X     |
| TOX4         | EFNA5    | HPX          | SPHAR    |
| NADK         | DOCK3    | GCHFR        | GBE1     |
| ZBTB16       | BYSL     | EMP3         | KRT13    |
| PRDM7        | PLCB2    | LIPI         | LRRC47   |
| CYP27A1      | RAB33B   | BOK          | MUC6     |
| LOC100144603 | ADRB3    | TUBGCP6      | PPID     |
| DEFB114      | UGT1A5   | LOC283624    | CAMK2A   |
| REC8         | EPB41    | EN2          | MT2A     |
| MMEL1        | EGR1     | NPY1R        | CAPN9    |
| CUL5         | DUSP7    | PRTN3        | GOLGB1   |
| MON1B        | C2       | HRAS         | KRT14    |
| DES          | RAD51    | PDIA3        | HES4     |
| MIR3201      | TTC29    | ETFB         | NAP1L4   |
| GLYATL3      | ANGPT1   | ABCC13       | RPS3A    |
| PARP2        | UGT1A9   | CD28         | CAMLG    |
| OR4F5        | EPHA8    | LOC90834     | MT3      |
| ZNF259       | ETF1     | SNORD8       | SDCCAG8  |
| TCF25        | CELSR3   | EPHA1        | GP9      |
| DTYMK        | C4A      | NPY5R        | KRT15    |
| MIR4535      | RYR3     | PTBP1        | PRDM16   |
| GFRAL        | SLC10A7  | IGF2         | NUP98    |
| DHRS2        | ANGPT2   | IPW          | MSMO1    |
| LINC00115    | UGT1A4   | FCAR         | CANX     |
| PCSK7        | EPHB2    | C21orf91-OT1 | NFATC3   |

|           |          |            |           |
|-----------|----------|------------|-----------|
| ZCCHC14   | FAT2     | CHRNA      | COG2      |
| EEF1B2    | FHIT     | LMF2       | GPR15     |
| KLHL31    | C4B      | OR6S1      | KRT16     |
| EFS       | SCG5     | EPHB6      | VWA1      |
| MORN1     | USP38    | PPID       | SLC22A18  |
| HTR3B     | ANK1     | RPS15      | SFRP2     |
| KIAA0182  | UGT1A1   | ILK        | CAST      |
| EPHA4     | EXTL1    | ITPKA      | POLR2C    |
| DEFB133   | FBN2     | FCGRT      | RBM34     |
| IRF9      | FLNB     | D21S2088E  | GPR27     |
| GLTPD1    | DDR1     | CHRNA      | KRT17     |
| ZW10      | SLC12A1  | KLHDC7B    | NADK      |
| ATMIN     | C4orf49  | OR5AU1     | SLC22A18A |
| ERBB4     | ANXA13   | EZH2       | TDO2      |
| MIR206    | UGT1A3   | MSMO1      | CCNB1     |
| PRMT5     | EYA3     | SGTA       | PSKH1     |
| OR4F16    | FER      | INS        | ABCB10    |
| UBE4A     | GNAI2    | IVD        | GRM2      |
| COTL1     | RUNX2    | FKBP1AP1   | KRT19     |
| ACSL3     | SNRPN    | POTED      | MMEL1     |
| PTCHD4    | PRMT10   | COL4A3     | POLR2L    |
| TM9SF1    | ASAH1    | RPL23AP82  | TLL1      |
| CCNL2     | USP40    | RNASE13    | CCNG1     |
| RBM7      | FGR      | FLNC       | PSMB10    |
| MLYCD     | FGF1     | TLL1       | OPN3      |
| FN1       | GNAT1    | STK11      | GSK3B     |
| MIR133B   | CCNC     | IRF7       | KRT31     |
| EDDM3A    | SORD     | LTK        | OR4F5     |
| TAS1R3    | PABPC4L  | FLT3LG     | PSMD13    |
| MPZL2     | ASPH     | LINC00317  | TLR2      |
| CPNE7     | HJURP    | COL4A4     | CCNH      |
| GBX2      | MTOR     | C22orf34   | RBL2      |
| RPS16P5   | GDF9     | ECRP       | TRIM58    |
| DHRS4     | XCR1     | GBX1       | GTF2E1    |
| ATAD3B    | CCND3    | TLR3       | KRT32     |
| ATP5L     | SPINT1   | TCF3       | LINC00115 |
| IL17C     | ZNF827   | KCNQ1      | RNH1      |
| GPC1      | ATP6V1B2 | MAP1A      | TLR3      |
| LOC730101 | HES6     | FPR1       | CD14      |
| RIPK3     | FUCA1    | LINC00320  | RRAD      |
| PLEKHN1   | GFRA3    | COL6A3     | AHCTF1    |
| TREH      | GPR27    | CHKB-CPT1B | HCLS1     |
| ANKRD11   | CDC5L    | C14orf176  | KRT33A    |
| GPR1      | SRP14    | GRM8       | MORN1     |
| GSTA7P    | DCLK2    | VEGFC      | MRPL23    |
| SUPT16H   | ATP6V1C1 | THOP1      | VEGFC     |
| C1orf170  | CXCR7    | LMO1       | CD74      |

|           |           |             |          |
|-----------|-----------|-------------|----------|
| CEP164    | IFI6      | MEIS2       | SALL1    |
| OSGIN1    | GLRA1     | FPR2        | OR1C1    |
| GPR35     | GPX1      | LOC388813   | HGD      |
| ACIN1     | CDKN1A    | CPS1        | KRT33B   |
| KIAA1751  | THBS1     | IL17REL     | GLTPD1   |
| EXPH5     | FREM3     | SNORD9      | RPL27A   |
| GINS2     | BAI1      | MNX1        | GLRA3    |
| HDLBP     | RNPEPL1   | GLRA3       | CDC25C   |
| KHNYN     | GABRD     | MADCAM1     | CCL17    |
| LOC115110 | GLRX      | LSP1        | OR2M4    |
| PHLDB1    | GRM2      | MFAP1       | HTR1F    |
| TRAPPC2L  | CDSN      | FPR3        | KRT34    |
| AGFG1     | TJP1      | LINC00478   | OR4F16   |
| SLC7A8    | MMAA      | CREB1       | RPLP2    |
| ACAP3     | BLK       | FAM116B     | SORBS2   |
| SIK2      | GAL3ST2   | HTR5A       | CDK7     |
| WWOX      | GALE      | SORBS2      | CCL22    |
| DNAJB2    | GM2A      | SF3A2       | OR2L2    |
| NGDN      | HYAL1     | MUC2        | ITGB5    |
| UBE2J2    | CGA       | TRPM1       | KRT35    |
| SIK3      | TP53BP1   | FTL         | CCNL2    |
| BCMO1     | ELMOD2    | ANKRD20A11P | RRM1     |
| HTR2B     | BMP1      | CRYBA2      | SAP30    |
| LRP10     | RAB17     | PIM3        | CDO1     |
| PUSL1     | GNB1      | IMPDH1      | CX3CL1   |
| BACE1     | GPX3      | SAP30       | OR2L1P   |
| NECAB2    | IMPDH2    | PPAP2C      | ITIH1    |
| IDH1      | CLIC1     | MUC6        | LASP1    |
| TINF2     | TYRO3     | NDN         | TAS1R3   |
| B3GALT6   | GUSBP5    | FUT1        | SCT      |
| CADM1     | POLR3D    | MIRLET7C    | SNORD73A |
| KLHDC4    | TRPM8     | CRYGA       | CDX1     |
| SP110     | SFN       | ODF3B       | SLC6A2   |
| OR10G3    | GRIA1     | INSIG1      | OR2T1    |
| TPRG1L    | ITIH1     | HAND2       | ITIH3    |
| REXO2     | CLPS      | AP3D1       | LHX1     |
| DEF8      | UBE3A     | NAP1L4      | ATAD3B   |
| IGFBP2    | LOC641364 | OCA2        | SMPD1    |
| OR10G2    | BNIP3L    | FUT2        | LRAT     |
| FAM213B   | MLPH      | MIR125B2    | CETN3    |
| TIMM8B    | GPR3      | CRYGB       | SLC9A5   |
| BANP      | NR3C1     | SYCE3       | TAF5L    |
| IGFBP5    | ITIH3     | IRF5        | ITIH4    |
| OR4E2     | CCR6      | RAPGEF2     | LIG3     |
| ACTRT2    | MKRN3     | MED16       | PLEKHN1  |
| SIDT2     | LOC641365 | NUP98       | TRIM21   |
| ZDHHC7    | OSGIN2    | PLCB2       | HAND2    |

|           |               |              |           |
|-----------|---------------|--------------|-----------|
| IHH       | IQCA1         | GPR32        | CHD1      |
| CIDEB     | ZBTB48        | MIR99A       | SLC12A3   |
| MIB2      | HARS          | CRYGC        | DISC2     |
| FXYD6     | ITIH4         | LOC100128946 | KPNA1     |
| CENPN     | CNR1          | KCNH2        | NBR1      |
| CXCR1     | SLC30A4       | MFAP3L       | C1orf170  |
| CHMP4A    | LOC646576     | FSTL3        | ST5       |
| SAMD11    | CA1           | SLC22A18     | RAPGEF2   |
| C11orf71  | C2orf54       | RAD51        | CKMT2     |
| C16orf61  | HMGN2         | GRIN2D       | SLC12A4   |
| CXCR2     | HINT1         | TEKT4P2      | DISC1     |
| STXBP6    | LAMB2         | CRYGD        | LSAMP     |
| LOC148413 | COL9A1        | LOC100144603 | ADAM11    |
| SLC35F2   | PAR5          | KEL          | KIAA1751  |
| JPH3      | C4orf51       | ADAM29       | STIM1     |
| CXCR2P1   | CA2           | APC2         | MFAP3L    |
| SLC39A2   | ILKAP         | SLC22A18AS   | ERCC8     |
| CCDC27    | HMGCL         | RYR3         | TK2       |
| RAB39A    | HSD17B4       | ARHGAP35     | PPPDE1    |
| VAT1L     | RPSA          | MIR3156-3    | MCM2      |
| INHA      | COL10A1       | CTLA4        | MEOX1     |
| FAM158A   | EIF3J         | MIR4535      | LOC115110 |
| CALML6    | LOC100129858  | LEP          | TAF10     |
| BTG4      | CA3           | ANXA10       | ADAM29    |
| KIAA1609  | ING5          | ABCA7        | AP3S1     |
| INPP5D    | HSPG2         | POLR2L       | TRADD     |
| ZNF219    | HSPA4         | SCG5         | SCCPDH    |
| C1orf86   | LTF           | GYS1         | MITF      |
| FAM55D    | COL11A2       | MIR3687      | MLLT6     |
| WFDC1     | JMJD7-PLA2G4B | CYP27A1      | ACAP3     |
| IRS1      | LOC100505545  | MEST         | TALDO1    |
| GMPR2     | CA8           | KLHL2        | ANXA10    |
| ATAD3C    | MGC16025      | UQCR11       | CLTB      |
| TTC12     | HTR1D         | PSMD13       | CES2      |
| MTHFSD    | HSPA9         | SNRPN        | TRIM17    |
| KCNJ13    | MAP4          | HAS1         | CD200     |
| SLC22A17  | COL12A1       | MIR3648      | MPP2      |
| LOC254099 | SNAP23        | DES          | UBE2J2    |
| C11orf57  | MIR4799       | MKLN1        | TH        |
| DBNDD1    | CALB1         | SCRG1        | KLHL2     |
| MAP2      | AGAP1         | SBNO2        | COX7C     |
| HAUS4     | HTR6          | RNH1         | NAE1      |
| TTLL10    | NDST1         | SORD         | ARID4B    |
| ELMOD1    | MITF          | HRC          | MYLK      |
| KLHL36    | COL19A1       | C21orf37     | MPP3      |
| MYL1      | HERC2         | DTYMK        | PUSL1     |
| C14orf119 | RUNX1T1       | NDUFB2       | TSPAN4    |

|           |           |         |          |
|-----------|-----------|---------|----------|
| FAM41C    | TWIST2    | DUX4    | SCRG1    |
| TEX12     | ID3       | HMHA1   | CRHBP    |
| FBXO31    | HTR4      | MRPL23  | NOL3     |
| NCL       | MOBP      | SPINT1  | EGLN1    |
| RNF31     | COX7A2    | PRMT1   | NDUFB4   |
| C1orf174  | SNURF     | EEF1B2  | MYO1D    |
| TMPRSS4   | CDH17     | NOS3    | B3GALT6  |
| CMIP      | NEU4      | PALLD   | TNNI2    |
| NDUFA10   | TNFRSF9   | SHC2    | DUX4     |
| RBM23     | IK        | RPL27A  | HAPLN1   |
| KLHL17    | MST1      | SRP14   | SLC7A6   |
| IFT46     | ATF6B     | IL11    | KIAA1383 |
| CDT1      | SLC28A2   | EPHA4   | CNTN3    |
| NDUFS1    | CEBPD     | CNOT4   | NAGLU    |
| C14orf167 | MTERFD2   | ANP32C  | TPRG1L   |
| TMEM240   | STMN1     | TIMM13  | TNNT3    |
| DSCAML1   | IL3       | RPLP2   | PALLD    |
| MAP1LC3B  | MST1R     | THBS1   | CSF1R    |
| SEPT2     | MAPK14    | IRF3    | ATP6V0D1 |
| OSGEP     | TGM5      | ERBB4   | KIF26B   |
| TMEM52    | CHRNA2    | NRF1    | PDHB     |
| ARHGAP20  | UBE2F     | FAM149A | NEUROD2  |
| DYNLRB2   | MATN1     | DAZAP1  | FAM213B  |
| NEU2      | IL4       | RRM1    | TRPC2    |
| ARHGEF40  | MYD88     | TJP1    | KIAA0922 |
| AGRN      | CSNK2B    | KCNA7   | CSF2     |
| USP28     | PPIP5K1   | ACSL3   | GPR56    |
| HSDL1     | CHRNA3    | PAX4    | HEATR1   |
| NPPC      | OTOS      | FBXO8   | PLXNA1   |
| METTL3    | MFAP2     | FGF22   | PEX12    |
| FAM132A   | IL5       | SCT     | ACTRT2   |
| CARD18    | MYL3      | TP53BP1 | PHLDA2   |
| CRISPLD2  | CTGF      | KCNC3   | TRIM2    |
| PAX3      | AQR       | FN1     | CSNK1A1  |
| LTB4R2    | CLU       | PIP     | N4BP1    |
| HES5      | MYEOV2    | DUX2    | ZNF692   |
| AASDHPPT  | MTHFR     | SLC39A3 | POU1F1   |
| SPIRE2    | IL9       | SMPD1   | PNMT     |
| PDCD1     | NKTR      | TYRO3   | MIB2     |
| SDR39U1   | CYP21A2   | KCNJ14  | TUB      |
| LOC388588 | ARHGAP11A | GBX2    | ANP32C   |
| C11orf1   | COX6C     | PODXL   | CSNK1G3  |
| ZNF469    | OR6B3     | PDLIM3  | NUP93    |
| PDE6D     | NBL1      | THEG    | NUP133   |
| RPGRIP1   | IL13      | TRIM21  | PRKCD    |
| RNF223    | CNTN3     | UBE3A   | MED1     |
| DYNC2H1   | CYP21A1P  | KIR2DL1 | SAMD11   |

|           |           |               |           |
|-----------|-----------|---------------|-----------|
| CNTNAP4   | LCMT2     | GPC1          | WEE1      |
| SERPINE2  | CRH       | PRSS1         | FAM149A   |
| NDRG2     | LOC150935 | SPOCK3        | VCAN      |
| MIR200A   | NPPA      | LSM7          | HERPUD1   |
| ALG9      | IRF1      | ST5           | ERO1LB    |
| CENPBD1   | PDHB      | MKRN3         | PROS1     |
| PPP1R7    | DAXX      | KIR2DL3       | PPY       |
| NYNRIN    | SLC12A6   | GPR1          | LOC148413 |
| MIR200B   | CTSB      | PRSS2         | ZNF143    |
| PDGFD     | LOC151171 | AADAT         | FBXO8     |
| ZNF276    | NPPB      | MBD3          | NKX2-5    |
| PSMD1     | ITK       | STIM1         | NUTF2     |
| HOMEZ     | PFKFB4    | SLC30A4       | FMN2      |
| FLJ42875  | DNAH8     | KIR2DL4       | PTPRG     |
| TMPRSS5   | RASGRP1   | GPR35         | PSMB3     |
| KCNG4     | CYC1      | TAS2R38       | CCDC27    |
| PTH2R     | LOC151174 | FAM198B       | ZNF195    |
| CHD8      | OPRD1     | MIER2         | DUX2      |
| ANKRD65   | KCNN2     | TAF10         | CTNNA1    |
| BCO2      | PLXNB1    | PAR5          | IRX5      |
| SDR42E1   | DOM3Z     | KIR2DS4       | ZNF695    |
| PTMA      | SERF2     | HDLBP         | RHO       |
| CCNB1IP1  | CYP7A1    | PTN           | PYY       |
| MIR429    | MSL3P1    | GALNT7        | CALML6    |
| TMPRSS13  | PAFAH2    | PCSK4         | ZNF214    |
| PKD1L2    | LECT2     | TALDO1        | ARFIP1    |
| PTPRN     | PRKAR2A   | EIF3J         | DBN1      |
| C14orf93  | DSP       | KIR3DL1       | KATNB1    |
| FAM138F   | GPR176    | AGFG1         | GJC2      |
| KIAA1826  | CYP11B1   | PTPRN2        | ROBO1     |
| RNF166    | LOC200772 | CLDN22        | PSMD3     |
| SNORD20   | PAX7      | C19orf24      | C1orf86   |
| ABHD4     | LMNB1     | TH            | ZNF215    |
| LOC643837 | PRKCD     | JMJD7-PLA2G4B | PDLIM3    |
| BUD13     | E2F3      | KIR3DL2       | DMXL1     |
| C16orf46  | CHP       | DNAJB2        | CTCF      |
| RPE       | CYP11B2   | RARRES2       | SIPA1L2   |
| EDDM3B    | CXXC11    | C4orf27       | ROBO2     |
| TMEM88B   | PEX10     | PLEKHJ1       | PSMD11    |
| TMEM25    | LNPEP     | TSPAN4        | ATAD3C    |
| DNAAF1    | PTH1R     | SNAP23        | RASSF7    |
| RPL37A    | EDN1      | KLK1          | SPOCK3    |
| CDH24     | OIP5      | HTR2B         | DHFR      |
| C1orf233  | ADAM3A    | RHEB          | NUDT21    |
| DIXDC1    | DUSP28    | MARCH1        | ZP4       |
| SPATA2L   | PEX14     | BTBD2         | RPL24     |
| SAG       | LOX       | TNNI2         | RAB5C     |

|              |          |           |           |
|--------------|----------|-----------|-----------|
| METTL17      | PTPRG    | HERC2     | LOC254099 |
| FAM138A      | EEF1A1   | KLK2      | PPFIBP2   |
| ZC3H12C      | BAHD1    | IDH1      | AADAT     |
| C16orf55     | DECR1    | SHH       | DIAPH1    |
| CCL20        | ESPNL    | NEIL3     | CNOT1     |
| IL25         | PGD      | RNF126    | RHOU      |
| WASH7P       | SMAD5    | TNNT3     | RPL29     |
| ALKBH8       | QARS     | SNURF     | RAD51D    |
| ZC3H18       | SLC29A1  | LAIR1     | TTLL10    |
| SLC4A3       | FAN1     | SP110     | IFITM1    |
| THTPA        | DEFA1    | SLC4A2    | FAM198B   |
| MIR551A      | RBM44    | TMEM144   | DOCK2     |
| FDXACB1      | PIK3CD   | SPPL2B    | ZNF423    |
| CDYL2        | MAN2A1   | TRPC2     | TFB2M     |
| SLC11A1      | SNORA62  | SLC28A2   | RPN1      |
| OR4K5        | EPB41L2  | LAIR2     | RARA      |
| CDK11A       | MAPKBP1  | IGFBP2    | FAM41C    |
| C11orf52     | DEFA3    | SMARCD3   | OR6A2     |
| SLC38A8      | AQP12A   | C4orf43   | ACCN5     |
| SP100        | PLA2G2A  | WDR18     | DPYSL3    |
| OR11H2       | MCC      | PHLDA2    | RPGRIP1L  |
| SLC35E2B     | ROBO1    | TGM5      | GREM2     |
| CARD16       | EPHA7    | LHB       | ATXN7     |
| SLC22A31     | GOLGA8A  | IGFBP5    | RPL19     |
| SPP2         | DEFA4    | SMO       | LOC284661 |
| OR4K1        | KLHL30   | UFSP2     | DCHS1     |
| LOC728716    | PLA2G5   | REXO1     | GALNT7    |
| APOA5        | MFAP3    | TUB       | DRD1      |
| FLJ30679     | ROBO2    | PPIP5K1   | CES3      |
| TNP1         | EYA4     | LIG1      | SMYD3     |
| IPO4         | RTF1     | IHH       | SLC15A2   |
| LOC729737    | DEFA5    | AKR1D1    | RPL27     |
| C11orf93     | OR6B2    | DDX60     | C1orf174  |
| LOC146513    | PLOD1    | LPPR3     | EIF3F     |
| TNS1         | NDUFA2   | ZNF195    | CLDN22    |
| DCAF11       | RPL29    | AQR       | SLC26A2   |
| OR4F29       | ESR1     | LIM2      | ARL2BP    |
| PIH1D2       | CYFIP1   | CXCR1     | ARV1      |
| ZFPM1        | DEFA6    | SSBP1     | NEK4      |
| TUBA4A       | ASB18    | CDKN2AIP  | CCL1      |
| OR4K15       | EXOSC10  | ZNF556    | KLHL17    |
| LOC100129534 | NEUROG1  | ZNF214    | BRSK2     |
| FAM55A       | ATXN7    | ARHGAP11A | DKFZP434I |
| ADAD2        | F13A1    | MYBPC2    | HBEGF     |
| SUMO1        | MGA      | CXCR2     | EDC4      |
| JPH4         | DEFB1    | TBXAS1    | C1orf35   |
| LOC100130417 | FLJ43879 | ODZ3      | TKT       |

|              |           |          |           |
|--------------|-----------|----------|-----------|
| FAM55B       | PPP1R8    | OR4F17   | CCL2      |
| ADAMTS18     | NPY6R     | ZNF215   | TMEM240   |
| VIL1         | SCN5A     | LCMT2    | CTR9      |
| RNASE7       | FABP7     | NDUFA3   | DCHS2     |
| LOC100132062 | VPS39     | CXCR2P1  | DUSP1     |
| AMICA1       | DEFB4A    | UBE2H    | PLA2G15   |
| MGC23284     | MIR149    | LRP2BP   | TTC13     |
| WNT6         | PRKCZ     | FAM108A1 | TMF1      |
| RAB2B        | PAM       | RASSF7   | CCL3      |
| LOC100132287 | SCN10A    | SLC12A6  | TMEM52    |
| KBTBD3       | FANCE     | NKG7     | TRIM66    |
| LINC00311    | FAM189A1  | INHA     | C4orf27   |
| XRCC5        | DPYS      | VIPR2    | EBF1      |
| AJUBA        | DNAJB3    | PDGFC    | PLEKHG4   |
| LOC100133331 | PTAFR     | KLF16    | PGBD5     |
| CWF19L2      | PCDH1     | PPFIBP2  | TNNC1     |
| ZNF778       | SEMA3F    | RASGRP1  | CCL3L1    |
| ZNF142       | FKBP5     | CNOT3    | AGRN      |
| ZFHX2        | CCNDBP1   | INPP5D   | TSPAN32   |
| LOC100133445 | DPYSL2    | XRCC2    | MARCH1    |
| KDELC2       | LOC643387 | FSTL5    | EFNA5     |
| ACSF3        | RAP1GAP   | DOT1L    | DKFZP434H |
| FZD5         | PCDHGC3   | IFITM1   | ZNF669    |
| RPPH1        | SMARCC1   | SERF2    | TRH       |
| LOC100133612 | FOXO3     | NPAS1    | CCL4      |
| LAYN         | C15orf2   | IRS1     | FAM132A   |
| LINC00304    | DUSP4     | ZYX      | TSSC4     |
| SCG2         | PRR21     | STOX2    | NEIL3     |
| LRRC16B      | RHCE      | KISS1R   | EGR1      |
| DDX11L1      | PCSK1     | OR6A2    | LRRC29    |
| TTC36        | NEK4      | GPR176   | ZNF672    |
| NUDT7        | FRK       | NTF4     | UPK1B     |
| FZD7         | C15orf63  | KCNJ13   | CCL5      |
| PPP1R3E      | E2F5      | ARHGEF5  | HES5      |
| TTC34        | AQP12B    | KIAA1430 | MRVI1     |
| C11orf65     | RHD       | LMNB2    | FBXW7     |
| SNAI3        | PDE6A     | DCHS1    | ETF1      |
| CUL3         | TCTA      | CHP      | TOX3      |
| TMEM55B      | FUCA2     | NUCB1    | PCNXL2    |
| LOC100288069 | TMEM87A   | MAP2     | UMPS      |
| MPZL3        | EEF1D     | ZNF212   | CCL7      |
| FAM92B       | D2HGDH    | FNIP2    | LOC388588 |
| DGKD         | RPA2      | MUM1     | TRIM22    |
| TTC5         | PDGFRB    | EIF3F    | TMEM144   |
| MIR4251      | TDGF1     | OIP5     | F2R       |
| ANKK1        | FYN       | PEG3     | CCDC113   |
| CTU2         | RPAP1     | MYL1     | SH3BP5L   |

|              |              |           |          |
|--------------|--------------|-----------|----------|
| STK16        | EGR3         | ZNF282    | WNT5A    |
| DHRS1        | LOC728323    | SH3RF1    | CCL8     |
| RNF214       | RPL11        | MIDN      | RNF223   |
| PABPN1L      | PFDN1        | BRSK2     | IFITM3   |
| KLF7         | TGM4         | BAHD1     | C4orf43  |
| CMTM5        | GABBR1       | POLD1     | F2RL1    |
| LOC283143    | DKFZP434L187 | NCL       | TMEM208  |
| LOC400548    | EIF4EBP1     | CUL1      | OR2G3    |
| ADAM23       | PP14571      | RXFP1     | CNBP     |
| RNASE11      | RPL22        | R3HDM4    | CCL11    |
| BCL9L        | PGGT1B       | TRIM66    | MIR200A  |
| LOC400550    | TKT          | FAN1      | DEAF1    |
| NRP2         | GABRR1       | PPP2R1A   | UFSP2    |
| TPPP2        | PLDN         | NDUFA10   | F2RL2    |
| FOXR1        | EPB49        | TRIM24    | C16orf80 |
| LOC400558    | LOC100286922 | SPCS3     | OR2G2    |
| CFLAR        | RPS6KA1      | C19orf6   | ZNF80    |
| RNASE8       | PITX1        | TSPAN32   | CCL13    |
| C11orf53     | TMF1         | MAPKBP1   | MIR200B  |
| C16orf74     | GABRR2       | PRKCG     | IPO7     |
| PER2         | GREM1        | NDUFS1    | DDX60    |
| MRPL52       | EPHX2        | MGAM      | F12      |
| C11orf34     | BOK-AS1      | TRAPPC11  | FHOD1    |
| SNORD68      | RSC1A1       | TPGS1     | OR2C3    |
| CDK5R2       | POU4F3       | TSSC4     | ZNF148   |
| PSMB11       | CLEC3B       | GOLGA8A   | CCL14    |
| C11orf87     | GCNT2        | PRRG2     | FLJ42875 |
| LOC727710    | RPUSD2       | SEPT2     | IFITM2   |
| RQCD1        | CLN8         | DGKI      | CDKN2AIP |
| OR4K14       | MIR4269      | MLF1IP    | FABP6    |
| C11orf92     | SCNN1D       | REEP6     | BRD7     |
| LOC732275    | PPIC         | TRIM22    | TRIM11   |
| LRRFIP1      | TNNC1        | RTF1      | MAPKAPK3 |
| OR4L1        | GJA1         | KLK7      | CCL15    |
| C11orf88     | TUBGCP4      | NEU2      | ANKRD65  |
| LOC100128881 | EXT1         | ATP6V1F   | TRIM3    |
| GPR55        | UBE2F-SCLY   | NBLA00301 | ODZ3     |
| OR11H6       | SDHB         | IZUMO4    | FAT2     |
| MIR34B       | PPP2CA       | IFITM3    | ZDHHC1   |
| LOC100129617 | UBA7         | CYFIP1    | C1orf124 |
| TRIP12       | GCLC         | KLK6      | SLMAP    |
| KLHL33       | EHD4         | NPPC      | CCL16    |
| MIR34C       | EXTL3        | ACCN3     | MIR429   |
| LOC100130015 | MIR2467      | WWC2      | OR7E12P  |
| ECEL1        | SRSF4        | SCAMP4    | LRP2BP   |
| MDP1         | PPP2R2B      | DEAF1     | FBN2     |
| DDI1         | USP4         | MGA       | PARD6A   |

|                |          |          |           |
|----------------|----------|----------|-----------|
| SYCE1L         | GLO1     | KLK10    | OBSCN     |
| EIF4E2         | DUOX2    | PAX3     | MANF      |
| FITM1          | EYA1     | PDIA4    | CCL18     |
| CARD17         | MIR4440  | CEP44    | FAM138F   |
| LOC100287036   | SKI      | ADAT3    | LYVE1     |
| TTLL4          | PURA     | IFITM2   | PDGFC     |
| REM2           | UQCRC1   | VPS39    | FER       |
| LOC643733      | GLP1R    | PTGIR    | PLLP      |
| MIR1910        | MYEF2    | PDCD1    | NTPCR     |
| HDAC4          | FABP4    | UBE3C    | RAB7A     |
| C14orf21       | MIR4786  | SNX25    | CCL23     |
| LOC643923      | SLC2A5   | ZNF554   | LOC643837 |
| MIR3182        | RPS14    | TRIM3    | KCNQ1OT1  |
| FARP2          | VIPR1    | FAM189A1 | FSTL5     |
| ADCY4          | GMPR     | PTPRH    | FGF1      |
| CLDN25         | NDUFAF1  | PDE6D    | CKLF      |
| C16orf95       | FABP5    | FAM131B  | EFCAB2    |
| FARSB          | MIR4441  | TKTL2    | ACOX2     |
| LOC283624      | SLC9A1   | GRIN3B   | SH3GL1P1  |
| RPL23AP64      | SGCD     | OR7E12P  | TMEM88B   |
| MIR4720        | WNT5A    | CCNDBP1  | PKP3      |
| ABCB6          | GNL1     | RPL18    | STOX2     |
| TSSK4          | NUSAP1   | SERPINE2 | FGFR4     |
| LOC100132078   | PTK2B    | FAM115A  | FAM96B    |
| MIR4722        | SRM      | CBR4     | KIAA1804  |
| ARPC2          | SKP1     | ZNF57    | BAP1      |
| DHRS4L2        | ZNF35    | KCNQ1OT1 | SLC4A1    |
| LOC100288346   | GPLD1    | C15orf2  | C1orf233  |
| MIR4719        | TMEM85   | RPL28    | SWAP70    |
| ARL4C          | FDFT1    | PPP1R7   | KIAA1430  |
| SNORD8         | TAF12    | DNAJB6   | FOXD1     |
| BACE1-AS       | SLC6A7   | MGC45800 | TPPP3     |
| ABI2           | IFRD2    | JSRP1    | ZNF496    |
| RNASE10        | GPR6     | PKP3     | CGGBP1    |
| MIR4301        | SPTBN5   | C15orf63 | SMARCE1   |
| RAMP1          | FGFR1    | RPS5     | FAM138A   |
| OR6S1          | TCEA3    | PSMD1    | DENND5A   |
| CASP12         | SLC12A2  | ABCF2    | FNIP2     |
| SPEG           | MAPKAPK3 | DDX60L   | FOXI1     |
| C14orf23       | GPR31    | MOB3A    | CES1P1    |
| LOC100526771   | CTDSPL2  | DENND5A  | C1orf198  |
| LANCL1         | FGL1     | TMEM87A  | RUVBL1    |
| OR4N2          | TCEB3    | RPS9     | STAT3     |
| HSPB2-C11orf52 | SLC22A4  | PTH2R    | WASH7P    |
| NMUR1          | SEMA3B   | FASTK    | RRP8      |
| OR4K2          | GPX5     | NAF1     | SH3RF1    |
| FXVD6-FXYD2    | KLF13    | C19orf21 | FLT4      |

|              |          |              |           |
|--------------|----------|--------------|-----------|
| STK25        | FNTA     | RRP8         | PRMT7     |
| OR4K13       | TNFRSF1B | RPAP1        | HIST3H2A  |
| MIR4491      | SLC22A5  | RPS11        | CADPS     |
| COPS8        | SLMAP    | PTMA         | STAT5A    |
| OR4K17       | GRIK2    | ABCB8        | MIR551A   |
| MIR4492      | DUOX1    | WDR17        | SIRT3     |
| CAPN10       | ADAM2    | PLK5         | RXFP1     |
| OR4N5        | TP73     | SIRT3        | GABRA1    |
| MIR4693      | SNX2     | DKFZP434L187 | DUS2L     |
| SP140        | MANF     | RRAS         | ZNF670    |
| OR11G2       | GRM1     | PTPRN        | B4GALT4   |
| LOC100652768 | MAGEL2   | PAXIP1       | STAT5B    |
| IKZF2        | GATA4    | ZFP42        | CDK11A    |
| OR11H4       | TNFRSF4  | C2CD4C       | OR52A1    |
| FASTKD2      | SPARC    | OR52A1       | SPCS3     |
| RNASE9       | ACOX2    | PLDN         | GABRA6    |
| PASK         | GRM4     | CLEC11A      | LPCAT2    |
| OR5AU1       | DLL4     | SNORD20      | NLRP3     |
| ATG4B        | GEM      | KLHDC10      | SNX4      |
| POTEG        | ZBTB17   | SPATA4       | TADA2A    |
| OBSL1        | SPINK1   | CIRBP-AS1    | SLC35E2B  |
| MIR208A      | BAP1     | ARFIP2       | ARFIP2    |
| DNPEP        | GSTA1    | GREM1        | TRAPPC11  |
| C14orf165    | INO80    | SEPW1        | GABRB2    |
| SH3BP4       | GFRA2    | RPE          | HEATR3    |
| OR11H12      | SLC30A2  | SSPO         | FAM36A    |
| KCNE4        | SPOCK1   | ENPP6        | SUCLG2    |
| RNASE13      | HYAL3    | C19orf25     | HNF1B     |
| NGEF         | GSTA2    | OR5E1P       | LOC728716 |
| OR4Q3        | PPP1R14D | RPUSD2       | OR5E1P    |
| SNORD82      | GLI4     | SLC1A5       | MLF1IP    |
| OR4M1        | LUZP1    | RPL37A       | GABRG2    |
| PNKD         | SRP19    | NUP205       | SLC38A7   |
| RNASE12      | CADPS    | ASB5         | C1orf96   |
| SNED1        | GSTA3    | ATP8B3       | HESX1     |
| POTEM        | MTMR10   | OR10A3       | MLX       |
| GIGYF2       | GML      | TUBGCP4      | LOC729737 |
| LOC642426    | PRDM2    | SLC8A2       | OR10A3    |
| TRAF3IP1     | TAF7     | SAG          | NBLA00301 |
| ECRP         | HYAL2    | AHCYL2       | GABRP     |
| ABCA12       | GSTA4    | C4orf38      | OGFOD1    |
| C14orf176    | ZNF770   | DIRAS1       | OR2M5     |
| SNORD51      | GNRH1    | FXC1         | NR1I2     |
| CBLN3        | LAPTM5   | EHD4         | THRA      |
| CNPPD1       | TCF7     | SNRNP70      | OR4F29    |
| SNORD9       | SUCLG2   | CCL20        | FXC1      |
| STK36        | GTF2H4   | TNPO3        | MAP9      |

|               |          |             |           |
|---------------|----------|-------------|-----------|
| DHRS4L1       | HAUS2    | C4orf39     | GDF9      |
| CPS1-IT1      | NPBWR1   | ZNF555      | LRRC36    |
| SNORD126      | ARID1A   | RBMXL2      | OR2M3     |
| ICOS          | TCOF1    | DUOX2       | MBD4      |
| MIR208B       | HESX1    | SPIB        | TOP2A     |
| GMPPA         | GUCA1A   | SLC4A3      | LOC100129 |
| MIR4307       | FAM82A2  | CLEC5A      | RBMXL2    |
| SMARCA1       | GPR20    | C4orf45     | WWC2      |
| LOC100505967  | SNHG3    | C19orf26    | GFRA3     |
| ANO7          | TGFBI    | PGAP2       | FBXL8     |
| NEDD8-MDP1    | BSN      | NDUFAF1     | OR2T12    |
| PRLH          | GUCA1B   | AURKC       | H1FX      |
| BCL2L2-PABPN1 | DNAJC17  | SLC11A1     | DNAJC7    |
| THAP4         | GPT      | MKRN1       | LOC100130 |
| MIR4707       | NR0B2    | TRIM60      | PGAP2     |
| ANKMY1        | UBE2B    | CSNK1G2-AS1 | CEP44     |
| SCLY          | LIMD1    | C11orf21    | GLRA1     |
| NOP58         | HIST1H1C | NUSAP1      | DOK4      |
| ASB1          | NOP10    | SULT2B1     | OR14C36   |
| CAB39         | GRINA    | SP100       | KALRN     |
| PRKAG3        | MMP23B   | CNTNAP2     | TUBG1     |
| UGT1A10       | UBE2D2   | C4orf46     | LOC100132 |
| UGT1A8        | CCRL2    | ODF3L2      | C11orf21  |
| UGT1A7        | HIST1H1D | TRPM5       | SNX25     |
| UGT1A6        | NDNL2    | TMEM85      | GLRX      |
| UGT1A5        | GSR      | SULT2A1     | DDX28     |
| UGT1A9        | MMP23A   | SPP2        | OR2T34    |
| UGT1A4        | VDAC1    | GIMAP2      | UBA3      |
| UGT1A1        | UBA3     | TMEM192     | UBTF      |
| UGT1A3        | HIST1H1E | ADAMTSL5    | LOC100132 |
| FEV           | C15orf24 | UBQLN3      | TRPM5     |
| INO80D        | GTF2E2   | SPTBN5      | MND1      |
| PID1          | KCNAB2   | SYT5        | GM2A      |
| ATG16L1       | WNT8A    | TNP1        | TSNAXIP1  |
| ANKZF1        | RPL14    | OR2F1       | OR2T10    |
| USP40         | HIST1H1B | RWDD4       | RRP9      |
| HJURP         | PAK6     | TMPRSS9     | PCGF2     |
| STRADB        | HAS2     | IGF2-AS1    | LOC100133 |
| HES6          | FCN3     | CTDSPL2     | UBQLN3    |
| ACCN4         | ST8SIA4  | TNNI3       | TKTL2     |
| DOCK10        | SEC22C   | TNS1        | GRK6      |
| MREG          | HIST1H1T | SLC13A4     | COQ9      |
| WDR12         | CASC5    | CCDC111     | OR2T4     |
| PECR          | NRG1     | NDUFS7      | MAGI1     |
| C2orf83       | AKR7A2   | BET1L       | ZNF207    |
| MFF           | REEP5    | KLF13       | LOC100133 |
| CXCR7         | RRP9     | TNNT1       | RNF141    |

|           |           |           |           |
|-----------|-----------|-----------|-----------|
| RNPEPL1   | HIST1H2AE | TUBA4A    | CBR4      |
| CYP20A1   | AVEN      | COPG2     | GPX3      |
| MARCH4    | HNF4G     | TRIML2    | CIAPIN1   |
| WDFY1     | ALDH4A1   | C19orf35  | OR2T11    |
| NYAP2     | NME5      | CEND1     | STXBP5L   |
| ALS2      | MAGI1     | DUOX1     | TAF15     |
| ZDBF2     | HIST1H2AD | TULP2     | LOC100133 |
| USP37     | ATP10A    | SUMO1     | IGF2-AS1  |
| CTDSP1    | HSF1      | TPK1      | FHDC1     |
| MPP4      | EIF4G3    | CCDC110   | GRIA1     |
| GAL3ST2   | PDLIM4    | WASH5P    | THAP11    |
| TMBIM1    | CACNA2D2  | CYB5R2    | OR2B11    |
| RAB17     | HIST1H2BD | MAGEL2    | GUCA1C    |
| RNF25     | GJD2      | NR1H2     | RND2      |
| COPS7B    | IKBKB     | VIL1      | DDX11L1   |
| RAPH1     | TNFRSF25  | SND1      | BET1L     |
| CDK15     | EIF4EBP3  | CYP4V2    | MGC45800  |
| TMEM237   | SLC22A14  | ONECUT3   | NR3C1     |
| NBEAL1    | HIST1H2BB | TRIM34    | PDP2      |
| CFLAR-AS1 | STARD9    | DLL4      | WDR64     |
| MRPL44    | IL7       | ZNF8      | IQCB1     |
| TRAK2     | TNFRSF14  | WNT6      | PIP4K2B   |
| TRPM8     | PCDHGB4   | SND1-IT1  | TTC34     |
| ATG9A     | SLC22A13  | LOC285441 | CEND1     |
| MLPH      | HIST1H1A  | MEX3D     | DDX60L    |
| FAM134A   | VPS18     | CDHR5     | GRM6      |
| GLB1L     | IMPA1     | INO80     | ZNF319    |
| SPAG16    | TNFRSF18  | ZNF17     | C1orf131  |
| CHPF      | CDC23     | XRCC5     | DZIP3     |
| IQCA1     | VPRBP     | DENND2A   | CNTNAP1   |
| ALS2CR8   | HCRTR2    | LOC285501 | LOC100288 |
| NHEJ1     | SQRDL     | FLJ45445  | CYB5R2    |
| FAM124B   | IDO1      | TOLLIP    | NAF1      |
| TM4SF20   | PER3      | PPP1R14D  | GTF2H2    |
| C2orf54   | ADAM19    | ZNF28     | RANBP10   |
| TUBA4B    | IP6K1     | ZNF142    | EDARADD   |
| ARMC9     | HDAC2     | ZNF777    | VPRBP     |
| EFHD1     | ZFP106    | LOC339975 | TCAP      |
| SPHKAP    | EIF3E     | PRSS57    | MIR4251   |
| WNT10A    | MAP3K6    | TRIM68    | TRIM34    |
| SLC19A3   | HDAC3     | MTMR10    | WDR17     |
| ILKAP     | PSMD6     | MZF1      | GZMA      |
| ITM2C     | HFE       | FZD5      | NOD2      |
| RHBDD1    | SPATA5L1  | TMEM176B  | MRPL55    |
| ING5      | KCNQ3     | TRIML1    | PSMD6     |
| PLCD4     | DHRS3     | FAM138F   | AOC3      |
| MGC16025  | P4HA2     | PIDD      | MIR4417   |

|           |           |              |           |
|-----------|-----------|--------------|-----------|
| TMEM169   | EXOGENOUS | ZNF770       | CDHR5     |
| DNER      | HIVEP1    | ZNF132       | ZFP42     |
| B3GNT7    | CHAC1     | SCG2         | GZMK      |
| SP140L    | KCNS2     | HIPK2        | DPEP2     |
| STK11IP   | VAMP3     | LOC340017    | HIST3H2BB |
| MOGAT1    | ATG12     | LINGO3       | TOMM70A   |
| AGAP1     | XYLB      | KCNQ1DN      | BECN1     |
| TWIST2    | HIVEP2    | HAUS2        | TOLLIP    |
| PARD3B    | C15orf29  | ZNF134       | SPATA4    |
| DIS3L2    | LOXL2     | FZD7         | HARS      |
| NEU4      | C1orf38   | WDR91        | DPEP3     |
| ICA1L     | NREP      | ANKRD37      | SLC35F3   |
| AP1S3     | OXSRI     | FAM138A      | PARP3     |
| SGPP2     | HLA-A     | MMP26        | KRT38     |
| ALS2CR12  | WDR76     | FAM82A2      | TRIM68    |
| SPATA3    | LPL       | ZNF135       | ENPP6     |
| TMEM198   | H6PD      | CUL3         | HEXB      |
| ZFAND2B   | CNOT8     | REPIN1       | PAPD5     |
| CPO       | PARP3     | LOC389247    | B3GALNT2  |
| MDH1B     | HLA-B     | LOC100288123 | COX17     |
| FBXO36    | TMEM62    | AKIP1        | KRT37     |
| MTERFD2   | LY6E      | DNAJC17      | PIDD      |
| UBE2F     | ISG15     | ZNF137P      | ASB5      |
| OTOS      | RAB9BP1   | DGKD         | HINT1     |
| MYEOV2    | ZNF197    | HILPDA       | AKTIP     |
| OR6B3     | HLA-C     | TRIM61       | C1orf150  |
| FAM117B   | SEMA6D    | MIR1909      | CD96      |
| LOC150935 | LY6H      | C11orf16     | KRT36     |
| PKI55     | PLCH2     | NOP10        | KCNQ1DN   |
| C2orf67   | HAND1     | ZNF154       | SH3D19    |
| LOC151171 | RBM6      | STK16        | HK3       |
| LOC151174 | HLA-DMA   | FSCN3        | GIN53     |
| METTTL21A | SPG11     | HELT         | LOC148824 |
| CCNYL1    | LYN       | MIR1227      | TFG       |
| ALS2CR11  | SDC3      | TMEM9B       | CDK5R1    |
| CCDC140   | MED7      | NDNL2        | MMP26     |
| SLC23A3   | RBM5      | ZNF175       | C4orf38   |
| LOC151300 | HLA-DMB   | KLF7         | HMGCR     |
| GPBAR1    | ELL3      | ATP6V0A4     | NDRG4     |
| SLC16A14  | MATN2     | LOC401164    | LOC149134 |
| LOC151475 | CROCC     | MIR3187      | ST3GAL6   |
| LINC00471 | MYOT      | NRIP3        | HAP1      |
| LOC151484 | NME6      | C15orf24     | AKIP1     |
| MSL3P1    | HLA-DOA   | TEAD2        | C4orf39   |
| WDR69     | NIPA2     | ADAM23       | HMMR      |
| C2orf57   | MCM4      | TAS2R3       | ACD       |
| PIKFYVE   | PUM1      | FAM92A3      | EXOC8     |

|              |           |           |          |
|--------------|-----------|-----------|----------|
| LOC200726    | NRG2      | MIR4321   | ARL6IP5  |
| TIGD1        | EIF1B     | ASCL3     | ZNHIT3   |
| LOC200772    | HLA-DOB   | PAK6      | C11orf16 |
| CCDC108      | C15orf48  | PPFIA3    | C4orf45  |
| C2orf72      | MMP16     | NRP2      | HNRNPAB  |
| CXXC11       | CEP104    | TAS2R4    | FTO      |
| UNC80        | CXCL14    | HSP90AA6P | RNF187   |
| RUFY4        | TRAIP     | MIR4745   | POLQ     |
| DUSP28       | HLA-DPA1  | CHRNA10   | EFTUD2   |
| ESPNL        | C15orf41  | CASC5     | TMEM9B   |
| ECEL1P2      | MOS       | PLA2G4C   | TRIM60   |
| LOC348761    | KLHL21    | PER2      | HNRNPH1  |
| C2orf62      | H2AFY     | CPA4      | IRX6     |
| RBM44        | ARIH2     | C4orf47   | CNST     |
| AQP12A       | HLA-DPB1  | PNPLA2    | ALDH1L1  |
| KLHL30       | ZFYVE19   | AVEN      | RPL23    |
| PLEKHM3      | MSR1      | NAPA      | NRIP3    |
| C2orf80      | SLC35E2   | CDK5R2    | RBM46    |
| RESP18       | SMAD5-AS1 | PRKAG2    | HRH2     |
| C2orf82      | ARL6IP5   | DUX4L4    | IRX3     |
| OR6B2        | HLA-DPB2  | PHRF1     | PLD5     |
| DYTN         | FRMD5     | ATP10A    | PDIA5    |
| ASB18        | MSRA      | SIGLEC5   | CCL4L1   |
| FLJ43879     | ZBTB40    | RQCD1     | ASCL3    |
| VWC2L        | RNF14     | ZC3HC1    | C4orf46  |
| MIR149       | NPRL2     | GALNTL6   | HSD17B4  |
| MIR153-1     | HLA-DQA1  | SCUBE2    | FAM65A   |
| MIR26B       | DISP2     | GJD2      | C1orf100 |
| DNAJB3       | MYBL1     | UBE2M     | RPP14    |
| MIR375       | MFN2      | LRRFIP1   | NR1D1    |
| SNORA41      | SNCAIP    | LUC7L2    | CHRNA10  |
| LOC643387    | CXCR6     | FRG2      | TIGD4    |
| PRR21        | HLA-DQA2  | SIGIRR    | HSPA4    |
| LOC646324    | CHRFAM7A  | STARD9    | C16orf57 |
| LOC646736    | MYC       | CYTH2     | IBA57    |
| PRSS56       | PTPRU     | GPR55     | HLA2     |
| AQP12B       | TTC37     | MRPS33    | MED24    |
| SNORA75      | CSPG5     | SLED1     | PNPLA2   |
| SCARNA6      | HLA-DQB1  | RIC8A     | TMEM154  |
| SCARNA5      | ULK4P3    | VPS18     | HSPA9    |
| SNORD11      | NBN       | ZNF264    | ELMO3    |
| SNORD70      | CELA3A    | TRIP12    | OR2T6    |
| D2HGDH       | CLINT1    | NUB1      | FSTL1    |
| LOC728323    | CCR9      | FLJ38576  | HDAC5    |
| DIRC3        | HLA-DQB2  | MRPL17    | PHRF1    |
| SNORD11B     | ULK4P1    | SQRDL     | TMEM192  |
| LOC100129175 | NDUFB9    | NCR1      | NDST1    |

|              |           |           |           |
|--------------|-----------|-----------|-----------|
| PP14571      | WASF2     | ECEL1     | SETD6     |
| LOC100130451 | PCDHGA8   | TAS2R5    | LOC255654 |
| LOC100286922 | USP19     | DUX4L6    | FAM107A   |
| MIR1471      | HLA-DRA   | EPS8L2    | GJC1      |
| MIR1244-1    | ARHGAP11B | ZFP106    | SCUBE2    |
| MIR548F2     | NEFM      | NAPSA     | RWDD4     |
| LOC100329109 | ANGPTL7   | EIF4E2    | HTR1A     |
| BOK-AS1      | PCDHA9    | CHPF2     | ESRP2     |
| MIR1244-3    | SLC38A3   | DUX4L5    | C1orf101  |
| MIR1244-2    | HLA-DRB1  | STK33     | NISCH     |
| MIR3131      | ATPBD4    | SPATA5L1  | PSME3     |
| MIR4268      | NEFL      | KLK4      | ZBED5     |
| MIR3130-1    | HNRNPR    | TTLL4     | CCDC111   |
| MIR3130-2    | MATR3     | NCAPG2    | HTR4      |
| MIR2355      | CYB561D2  | DUX4L3    | FAM192A   |
| MIR3132      | HLA-DRB5  | CHID1     | PGBD2     |
| MIR4269      | C15orf57  | CHAC1     | FILIP1L   |
| LOC100507443 | TONSL     | ZNF432    | EIF1      |
| UBE2F-SCLY   | SRRM1     | HDAC4     | SIGIRR    |
| MIR4439      | KIAA0141  | CHCHD3    | TRIML2    |
| MIR4776-1    | TMEM115   | MIR578    | IK        |
| MIR4777      | HLA-DRB6  | OR51G1    | CENPT     |
| MIR2467      | C15orf23  | C15orf29  | OR2L13    |
| MIR4775      | NKX3-1    | DHX34     | MGLL      |
| MIR4440      | CNKSR1    | FARP2     | NBR2      |
| MIR4786      | JAKMIP2   | WDR60     | RIC8A     |
| MIR4776-2    | RPP14     | LINC00290 | CCDC110   |
| MIR4441      | HLA-E     | OR51B4    | IL3       |
|              | BMF       | WDR76     | CHD9      |
|              | NOV       | SAE1      | OR14A16   |
|              | UBE4B     | FARSB     | TWF2      |
|              | PJA2      | RBM28     | RAMP2     |
|              | FAM107A   | LOC728175 | MRPL17    |
|              | HLA-F     | OR51B2    | CYP4V2    |
|              | SHF       | TMEM62    | IL4       |
|              | ODF1      | TRIM28    | C16orf70  |
|              | MAD2L2    | ABCB6     | HNRNPU-A  |
|              | DDX46     | TMEM140   | COPG      |
|              | WDR6      | DUX4L2    | VAT1      |
|              | HLA-G     | OR52N1    | EPS8L2    |
|              | DUOXA1    | SPG11     | LOC285441 |
|              | TNFRSF11B | ZNF256    | IL5       |
|              | PDPN      | ARPC2     | GFOD2     |
|              | SLC23A1   | GIMAP4    | VN1R5     |
|              | RASSF1    | LOC731424 | MYH15     |
|              | HLA-H     | RIC3      | LEPREL4   |
|              | SNORD107  | ELL3      | STK33     |

|          |              |           |
|----------|--------------|-----------|
| OPRK1    | LILRB2       | LOC285501 |
| GMEB1    | ARL4C        | IL6ST     |
| GNPDA1   | GIMAP5       | C16orf48  |
| NISCH    | CLDN24       | LOC339529 |
| HLA-J    | SLC25A22     | TMCC1     |
| CHST14   | NIPA2        | CCT6B     |
| PCM1     | ZNF211       | CHID1     |
| NUDC     | ABI2         | RNF175    |
| SRA1     | TMEM176A     | IL9       |
| TREX1    | LOC100288255 | SLC7A6OS  |
| HLA-L    | ATHL1        | LOC339535 |
| CASC4    | C15orf48     | PDZRN3    |
| PDE7A    | TRAPPC2P1    | C1QL1     |
| MASP2    | RAMP1        | OR51G1    |
| RAD50    | TRPV6        | LOC339975 |
| SCN11A   | MIR1305      | IL12B     |
| HMGA1    | OR51G2       | NLRC5     |
| TUBGCP5  | C15orf41     | OR6F1     |
| PDGFRL   | ZNF274       | PLXND1    |
| SRSF10   | SPEG         | RUNDC3A   |
| KIF20A   | AGK          | OR51B4    |
| TUSC2    | MIR4276      | TRIML1    |
| HSF2     | OR51E2       | IL13      |
| TGM7     | ZFYVE19      | CCDC135   |
| ENPP2    | ZNF460       | OR2W3     |
| UTS2     | LANCL1       | RAD54L2   |
| G3BP1    | METTL2B      | STARD3    |
| TWF2     | MIR3945      | OR51B2    |
| HSPA1A   | PTDSS2       | LOC340017 |
| CATSPER2 | FRMD5        | IRF1      |
| PENK     | RUUBL2       | CAPNS2    |
| RER1     | NMUR1        | OR2T8     |
| APBB3    | TRPV5        | FRMD4B    |
| TRAK1    | MIR3688-1    | DDX52     |
| HSPA1B   | MOB2         | OR52N1    |
| NIPA1    | DISP2        | PRSS48    |
| PLAG1    | LILRB1       | ISL1      |
| RCAN3    | STK25        | MT4       |
| TNIP1    | ZC3HAV1      | OR2T3     |
| DHX30    | LOC100505989 | STAB1     |
| HSPA1L   | FAM160A2     | DUSP14    |
| PLA2G4E  | CHRFAM7A     | RIC3      |
| PLAT     | KDELRL1      | ANKRD37   |
| MST1P2   | COPS8        | ITGA1     |
| SEC24A   | AKR1B10      | B3GNT9    |
| SACM1L   | LOC100506013 | OR2T29    |
| HSP90AB1 | TRIM5        | FAM208A   |

|           |              |           |
|-----------|--------------|-----------|
| TRIM69    | ULK4P3       | SYNRG     |
| PLEC      | LILRB5       | SLC25A22  |
| MST1P9    | CAPN10       | LOC389247 |
| C5orf4    | ACTR3B       | ITGA2     |
| SCAP      | LOC100506085 | NKD1      |
| HTR1B     | SYT8         | IRF2BP2   |
| PAR1      | ULK4P1       | RYBP      |
| PNOC      | SLC27A5      | CASC3     |
| PADI2     | SP140        | ATHL1     |
| FAM114A2  | KIAA1147     | TRIM61    |
| LAMB2P1   | LOC100506122 | ITK       |
| HTR1E     | PRKCDBP      | RSPRY1    |
| C15orf43  | ARHGAP11B    | FAM89A    |
| PMP2      | LILRB4       | C3orf27   |
| LYPLA2    | IKZF2        | IKZF3     |
| BRD8      | FAM40B       | OR51G2    |
| EXOSC7    | LOC100506229 | HELT      |
| ID4       | ODF3         | KCNMB1    |
| LOC145663 | ATPBD4       | CCDC102A  |
| POLB      | KLK11        | C1orf31   |
| PARK7     | FASTKD2      | ABHD14A   |
| TCERG1    | ESYT2        | GPATCH8   |
| PDZRN3    | MIR3688-2    | OR51E2    |
| IFNGR1    | OSBPL5       | LOC401164 |
| LOC145845 | C15orf57     | KCNN2     |
| POLR2K    | LILRA1       | CMTM1     |
| CTRC      | PASK         | C1orf229  |
| HNRNPA0   | ZNF398       | C3orf17   |
| RAD54L2   | LRRC56       | KCNH4     |
| IGF2R     | C15orf23     | PTDSS2    |
| TMCO5A    | LILRB3       | FAM92A3   |
| POU5F1B   | ATG4B        | KIF2A     |
| ACOT7     | KIAA1549     | NRN1L     |
| SPINK5    | MRGPRE       | OR2M1P    |
| FRMD4B    | BMF          | POC1A     |
| IL17A     | LILRA3       | SUZ12     |
| ZSCAN29   | OBSL1        | MOB2      |
| PPP2CB    | MLL3         | HSP90AA6F |
| DNAJC8    | ART5         | TNPO1     |
| SOX30     | SHF          | CMTM3     |
| STAB1     | LILRA2       | OR11L1    |
| IMPG1     | DNPEP        | ABI3BP    |
| TTBK2     | EXOC4        | FAM215A   |
| PPP2R2A   | TRIM78P      | SBF2      |
| CLSTN1    | DUOXA1       | C4orf47   |
| KIF3A     | KPTN         | LCP2      |
| NBEAL2    | SH3BP4       | C16orf78  |

|           |           |          |
|-----------|-----------|----------|
| ITPR3     | GALNT11   | OR2L8    |
| CDAN1     | TRIM6     | PVRL3    |
| PPP3CC    | SNORD107  | KRT23    |
| AKR7A3    | KLK8      | FAM160A2 |
| SYNPO     | KCNE4     | DUX4L4   |
| FAM208A   | LRRC4     | LECT2    |
| JARID2    | OR52E2    | SNX20    |
| STRC      | CHST14    | OR2AK2   |
| PKIA      | PNKP      | CHMP2B   |
| SPEN      | NGEF      | TMEM98   |
| RHOBTB3   | LMBR1     | TRIM5    |
| KLHL18    | OR52J3    | GALNTL6  |
| KIFC1     | CASC4     | LMNB1    |
| CSNK1A1P1 | U2AF2     | RLTPR    |
| PRKDC     | SNORD82   | OR2L3    |
| KDM1A     | LINC00244 | DNAH1    |
| ABLIM3    | OR51L1    | AATF     |
| LARS2     | TUBGCP5   | SYT8     |
| KIF25     | ATF5      | FRG2     |
| OTUD7A    | PNKD      | LNPEP    |
| PTK2      | NOM1      | KCTD19   |
| WDTC1     | OR51A7    | OR2M2    |
| ELL2      | TGM7      | LRIG1    |
| RYBP      | PPP6R1    | TUBG2    |
| KPNA5     | SNED1     | PRKCDBP  |
| SPRED1    | CCDC136   | SLED1    |
| PVT1      | OR51S1    | LOX      |
| KIAA0090  | CATSPER2  | CMTM4    |
| HMGXB3    | CARD8     | OR2T33   |
| NAT6      | GIGYF2    | ERC2     |
| LAMA2     | PARP12    | NKIRAS2  |
| PGBD4     | OR51F2    | ODF3     |
| PEX2      | NIPA1     | FLJ38576 |
| KIF1B     | ZC3H4     | LTC4S    |
| ARHGAP26  | TRAF3IP1  | CMTM2    |
| ABHD14A   | CREB3L2   | OR2M7    |
| LAMA4     | OR52R1    | APPL1    |
| ADAL      | PLA2G4E   | CCDC56   |
| RAB2A     | RPL13A    | OSBPL5   |
| PLEKHM2   | ABCA12    | DUX4L6   |
| FSTL4     | LRRC61    | CD180    |
| POC1A     | OR52M1    | BEAN1    |
| LPA       | TRIM69    | OR2G6    |
| EXD1      | SYNGR4    | ZBTB20   |
| RAD21     | SNORD51   | PSMC3IP  |
| OTUD3     | C7orf49   | LRRC56   |
| SEPT8     | OR52K2    | DUX4L5   |

|          |           |           |
|----------|-----------|-----------|
| TMEM158  | PAR1      | SMAD5     |
| LTA      | LILRA4    | CPNE2     |
| FSIP1    | CNPPD1    | OR2T2     |
| RP1      | GCC1      | OR5K1     |
| KAZN     | OR5P2     | SOCS7     |
| PPIP5K2  | C15orf43  | MRGPRE    |
| NDUFAF3  | ZIM2      | DUX4L3    |
| LTB      | STK36     | MAN2A1    |
| RHOV     | ZNF767    | GPR114    |
| RPL7     | OR5P3     | OR2T5     |
| CAMTA1   | LOC145663 | OR5H1     |
| ACSL6    | NUP62     | SOST      |
| MYRIP    | CPS1-IT1  | ART5      |
| MARCKS   | TTC26     | MIR578    |
| UBR1     | OR2D3     | MAP1B     |
| RPL8     | LOC145845 | PRSS54    |
| DNAJC16  | HSPBP1    | OR14I1    |
| PHF15    | ICOS      | GNL3      |
| PTPN23   | JHDM1D    | RAPGEFL1  |
| MAK      | OR2D2     | TRIM78P   |
| PATL2    | TMCO5A    | LINC00290 |
| RPL30    | PPP1R15A  | MCC       |
| UBR4     | GMPPA     | CES5A     |
| LARP1    | TMUB1     | OR2T27    |
| DNAH1    | OR52W1    | FAM162A   |
| MAN1A1   | ZSCAN29   | SLC25A39  |
| LPCAT4   | ZNF324    | TRIM6     |
| RPS20    | SMARCA11  | LOC728175 |
| ATP13A2  | SLC37A3   | MEF2C     |
| HARS2    | OR56A4    | GPR97     |
| HIGD1A   | TTBK2     | OR2T35    |
| MAS1     | KLK5      | SEC22A    |
| PLA2G4F  | ANO7      | HIGD1B    |
| SDC2     | KRBA1     | OR52E2    |
| TARDBP   | OR56A1    | DUX4L2    |
| TNFAIP8  | CDAN1     | MAP3K1    |
| LRIG1    | PRKD2     | CNEP1R1   |
| MCM3     | PRLH      | TRIM67    |
| LRRC57   | FAM71F1   | ATP2C1    |
| SDCBP    | SYT9      | CDK12     |
| CELA3B   | STRC      | OR52J3    |
| GEMIN5   | ZNF473    | FAM160A1  |
| ERC2     | THAP4     | MFAP3     |
| MDFI     | SLC35B4   | CCDC79    |
| C15orf55 | OR52B4    | MAP1LC3C  |
| SFRP1    | CSNK1A1P1 | FOXP1     |
| ICMT     | KLK13     | KRT20     |

|           |           |           |
|-----------|-----------|-----------|
| PCDHGA12  | ANKMY1    | OR51L1    |
| APPL1     | TMEM209   | LOC731424 |
| ME1       | C11orf40  | MGAT1     |
| HMGN2P46  | OTUD7A    | CES4A     |
| SFTPC     | CCDC9     | OR2W5     |
| PADI4     | SCLY      | ZBTB11    |
| LRRTM2    | OR6W1P    | NLE1      |
| GNL3      | OR52I2    | OR51A7    |
| MEA1      | SPRED1    | CLDN24    |
| SLC24A5   | PRPF31    | MOC52     |
| ST3GAL1   | NOP58     | EXOC3L1   |
| TMEM50A   | ADCK2     | OR13G1    |
| CCDC69    | OR51E1    | MORC1     |
| FOXP1     | PGBD4     | FNDC8     |
| MAP3K4    | FGF21     | OR51S1    |
| LOC283683 | ASB1      | LOC100288 |
| SLA       | PLXNA4    | MSH3      |
| STX12     | UBQLNL    | LOC283856 |
| PCDHB5    | ADAL      | DUSP5P    |
| SPCS1     | SNORD35A  | SPCS1     |
| MAP3K5    | CAB39     | CWC25     |
| OR4N4     | ZC3HAV1L  | OR51F2    |
| SLC7A2    | LOC143666 | MIR1305   |
| CLIC4     | EXD1      | MSX2      |
| FBXL21    | SNORD34   | LOC283867 |
| SETD2     | PRKAG3    | SNRPD2P2  |
| MEP1A     | LOC93432  | ACAD9     |
| LOC283710 | OR10A5    | SLFN12    |
| SLC18A1   | FSIP1     | OR52R1    |
| SYF2      | SNORD33   | MIR3140   |
| KLHL3     | UGT1A10   | NAIP      |
| PRSS50    | CPA5      | MT1DP     |
| MICB      | OR2AG1    | RPS7P5    |
| FAM98B    | RHOV      | ASTE1     |
| SLC20A2   | SNORD32A  | KLHL11    |
| CHD5      | UGT1A8    | OR52M1    |
| HAVCR1    | CEP41     | MIR4276   |
| RBM15B    | DNHD1     | NDUFA2    |
| MLN       | UBR1      | TEPP      |
| PLA2G4D   | SIGLEC7   | LOC646627 |
| SNAI2     | UGT1A7    | KLF15     |
| C1orf144  | C7orf29   | RHOT1     |
| SNORD63   | SCGB1C1   | OR52K2    |
| GMPPB     | PATL2     | MIR3945   |
| MLLT4     | BBC3      | NDUFS4    |
| HERC2P3   | UGT1A6    | LOC388276 |
| SNTB1     | TSGA13    | SNORA14B  |

|            |           |            |
|------------|-----------|------------|
| LDLRAP1    | C11orf42  | GTPBP8     |
| SNORA74A   | LPCAT4    | C17orf79   |
| ARHGEF3    | DKKL1     | OR5P2      |
| MOCS1      | UGT1A5    | MIR3688-1  |
| GOLGA6L1   | AGAP3     | NEUROG1    |
| SPAG1      | NLRP6     | C16orf86   |
| NOC2L      | PLA2G4F   | LOC731275  |
| CYFIP2     | SIGLEC9   | TAGLN3     |
| ABHD5      | UGT1A9    | UTP6       |
| MOG        | C7orf13   | OR5P3      |
| GOLGA8G    | NS3BP     | LOC100505  |
| SQLE       | LRRC57    | NPM1       |
| FBXO2      | SIGLEC8   | CES1P2     |
| PKD2L2     | UGT1A4    | LOC100130  |
| C3orf18    | OR9A4     | RBM15B     |
| MSH5       | OR56B4    | GSDMB      |
| GOLGA8IP   | C15orf55  | OR2D3      |
| STAR       | GPR77     | LOC100506  |
| FBXO6      | UGT1A1    | NPY6R      |
| UQCRQ      | OR9A2     | MIR138-2   |
| SS18L2     | LOC255512 | LOC100287  |
| MUT        | HMGN2P46  | SEC61A1    |
| SNORD108   | CHMP2A    | ATXN7L3    |
| STC1       | UGT1A3    | OR2D2      |
| PLA2G2D    | C7orf34   | LOC100506  |
| AFF4       | OR52B2    | PAM        |
| SHISA5     | LOC283683 | MIR328     |
| MYB        | DHDH      | LGALS8-AS1 |
| SNORD109A  | FEV       | PIK3R4     |
| STK3       | TMEM139   | PLXDC1     |
| OR4F3      | C11orf35  | OR52W1     |
| IL17B      | OR4N4     | LOC100506  |
| ZDHHC3     | ZNF544    | PCDH1      |
| MYO6       | INO80D    | LOC643714  |
| SNORD109B  | NOBOX     | MIR1182    |
| TACC1      | OR51F1    | PODXL2     |
| RNU11      | LOC283710 | LYZL6      |
| SLC27A6    | UBE2S     | OR56A4     |
| ZMYND10    | PID1      | LOC100506  |
| RPL10A     | OR2A14    | PCDHGC3    |
| SNORD115-1 | OR51B5    | LOC643802  |
| TAF2       | FAM98B    | MIR1537    |
| HSPB7      | SLC6A16   | ARHGEF3    |
| SNX24      | ATG16L1   | ARHGAP23   |
| TEX264     | OR6B1     | OR56A1     |
| NEDD9      | KRT8P41   | MIR4453    |
| WHAMMP3    | PLA2G4D   | PCSK1      |

|           |            |            |
|-----------|------------|------------|
| TCEA1     | TFPT       | CRNDE      |
| ARHGEF16  | ANKZF1     | LINC00184  |
| MRPL22    | OR2F2      | TRAT1      |
| CCDC72    | OR51V1     | FKBP10     |
| NEU1      | HERC2P3    | SYT9       |
| POTEB     | STRN4      | MIR3688-2  |
| TCEB1     | USP40      | PDE4D      |
| AHDC1     | ZNF786     | MT1IP      |
| PCDHB1    | H19        | TSNAX-DISC |
| ZNF589    | GOLGA6L1   | IMPG2      |
| NFKBIE    | CCDC106    | C17orf75   |
| FMN1      | HJURP      | OR52B4     |
| TERF1     | PRSS37     | PDE6A      |
| SMPDL3B   | EFCAB4A    | LOC644649  |
| TMED7     | GOLGA8G    | MIR3123    |
| HEMK1     | EPN1       | C3orf18    |
| NFKBIL1   | STRADB     | WNK4       |
| SNORD64   | KLF14      | C11orf40   |
| TG        | TMEM80     | PDGFRB     |
| PRO0611   | GOLGA8IP   | KIAA0895L  |
| ISOC1     | GLTSCR2    | MIR3124    |
| IP6K2     | HES6       | TIMMDC1    |
| NFYA      | C7orf45    | C17orf53   |
| PAR4      | OR10A4     | OR52I2     |
| KLF10     | SNORD108   | PFDN1      |
| LINC00339 | GLTSCR1    | SNORA46    |
| SAR1B     | ACCN4      | MIR3620    |
| SFMBT1    | SVOPL      | PLA1A      |
| NMBR      | OLFML1     | TMUB2      |
| PAR-SN    | SNORD109A  | OR51E1     |
| TPD52     | EHD2       | PGGT1B     |
| SSU72     | DOCK10     | SNORA50    |
| DCTN4     | MTPN       | MIR3916    |
| NCKIPSD   | LOC283299  | TEX264     |
| NOTCH4    | SNORD109B  | DHX58      |
| LOC348120 | KLK14      | UBQLNL     |
| TRHR      | MREG       | PIK3R1     |
| UBIAD1    | LRGUK      | MIR3935    |
| MZB1      | C11orf36   | LOC100506  |
| PHF7      | SNORD115-1 | HEMK1      |
| NT5E      | KLK12      | MMP28      |
| MRPL42P5  | WDR12      | LOC143666  |
| TRPS1     | ASB10      | PITX1      |
| PADI1     | NLRP10     | LOC100505  |
| PAIP2     | WHAMMP3    | LOC100506  |
| TLR9      | SHANK1     | SFMBT1     |
| OPRM1     | PECR       | DHRS11     |

|          |           |           |
|----------|-----------|-----------|
| C15orf52 | PRSS58    | OR10A5    |
| TSTA3    | NLRP14    | PMCHL2    |
| PLA2G2E  | POTEB     | LOC100505 |
| CDKL3    | NOSIP     | ZNF670-ZN |
| LZTFL1   | C2orf83   | PHF7      |
| PARK2    | RNF32     | DCAKD     |
| GOLGA8E  | ANO9      | OR2AG1    |
| TTPA     | FMN1      | POU4F3    |
| WRAP73   | ZNF580    | CKLF-CMTN |
| PCDH12   | MFF       | MIR4753   |
| P4HTM    | TRY6      | FBXO40    |
| PBX2     | LOC338651 | GGNBP2    |
| OR4M2    | SNORD64   | DNHD1     |
| UBE2V2   | HSD17B14  | PPIC      |
| SLC45A1  | CXCR7     | MIR4666A  |
| FAM13B   | LOC154761 | TLR9      |
| SLC6A20  | B4GALNT4  | MRM1      |
| PCMT1    | PAR4      | SCGB1C1   |
| OR4N3P   | GP6       | PPP2CA    |
| COL14A1  | RNPEPL1   | MIR4677   |
| HP1BP3   | CLEC2L    | SEMA5B    |
| FAM53C   | OR52L1    | PLEKHH3   |
| IL17RD   | PAR-SN    | C11orf42  |
| PDCD2    | VRK3      | PPP2R2B   |
| CTXN2    | CYP20A1   | MIR4671   |
| UQCRB    | C7orf55   | WDR5B     |
| CELA2B   | OR2AG2    | DBF4B     |
| REEP2    | LOC348120 | NLRP6     |
| C3orf75  | ZNF581    | MAPK9     |
| ENPP1    | MARCH4    | MIR4427   |
| HERC2P2  | LOC154822 | PARP14    |
| VDAC3    | OR52B6    | MYO19     |
| ZNF593   | MRPL42P5  | NS3BP     |
| PRR16    | PTOV1     | PROP1     |
| SNRK     | WDFY1     | IL17RD    |
| ENPP3    | TMEM213   | COASY     |
| C15orf53 | OR10A2    | OR56B4    |
| WRN      | C15orf52  | PURA      |
| MECR     | PPP1R12C  | GRAMD1C   |
| COMMD10  | NYAP2     | SRCIN1    |
| QRICH1   | GIMAP8    | LOC255512 |
| PEX6     | OVCH2     | RAD17     |
| C15orf54 | GOLGA8E   | ROPN1     |
| YWHAZ    | TRPM4     | AARSD1    |
| SDF4     | ALS2      | OR52B2    |
| LARS     | CRYGN     | RARS      |
| PXK      | PDDC1     | SIDT1     |

|            |           |           |
|------------|-----------|-----------|
| PEX7       | OR4M2     | KRTAP1-3  |
| DUOXA2     | ZNF586    | C11orf35  |
| ZNF7       | ZDBF2     | RASA1     |
| MRT04      | ZNF425    | PXK       |
| CXXC5      | MRGPRG    | KRTAP1-1  |
| SLC25A38   | OR4N3P    | OR51F1    |
| PGC        | FAM83E    | RASGRF2   |
| MIR211     | USP37     | RG9MTD1   |
| ZNF16      | LOC155060 | KRTAP9-9  |
| YTHDF2     | KRTAP5-1  | OR51B5    |
| RAPGEF6    | HERC2P2   | RPS14     |
| ULK4       | EPS8L1    | SLC41A3   |
| PGK2       | CTDSP1    | KRTAP4-6  |
| NF1P2      | ZNF746    | KRT8P41   |
| FZD3       | KRTAP5-3  | RPS23     |
| PADI3      | C15orf53  | SLC35A5   |
| ERAP1      | RASIP1    | KRTAP2-1  |
| FEZF2      | MPP4      | LOC283104 |
| PGM3       | ATP6V0E2  | SGCD      |
| HERC2P9    | KRTAP5-4  | TMEM45A   |
| TUSC3      | C15orf54  | TTC25     |
| ERRFI1     | TMEM160   | CSNK2A1P  |
| KDM3B      | GAL3ST2   | SKP1      |
| EBLN2      | RBM33     | FEZF2     |
| PHF1       | IFITM5    | KRTAP4-12 |
| WHAMMP2    | DUOXA2    | OR51V1    |
| UBXN8      | PIH1D1    | SLC6A7    |
| WNT4       | TMBIM1    | IFT57     |
| PHAX       | MGC27345  | KRTAP1-5  |
| ANO10      | FAM99A    | H19       |
| PIM1       | MIR211    | SLC12A2   |
| GOLGA8B    | C19orf73  | EBLN2     |
| KAT6A      | RAB17     | KRTAP3-1  |
| FBXO42     | GALNTL5   | EFCAB4A   |
| RBM27      | OR56B1    | SLC34A1   |
| DALRD3     | NF1P2     | SHQ1      |
| PKHD1      | PNMAL1    | KRTAP3-2  |
| EIF2AK4    | RNF25     | TMEM80    |
| PSCA       | GIMAP7    | SLC22A4   |
| RNF186     | GVINP1    | PBRM1     |
| FLJ11235   | HERC2P9   | KRTAP9-2  |
| SHQ1       | TMEM143   | OR10A4    |
| PLAGL1     | COPS7B    | SLC22A5   |
| CATSPER2P1 | ZNF467    | DPPA4     |
| FZD6       | OR52K1    | KRTAP9-3  |
| MXRA8      | WHAMMP2   | OLFML1    |
| PCDHB18    | ZNF444    | SLIT3     |

|           |            |           |
|-----------|------------|-----------|
| PBRM1     | RAPH1      | TMEM39A   |
| PLG       | ZNF800     | KRTAP9-8  |
| LOC503519 | OR52I1     | LOC283299 |
| NSMAF     | GOLGA8B    | SMN1      |
| HES2      | ZNF331     | ZNF654    |
| PCDHB17   | CDK15      | KRTAP17-1 |
| CHDH      | GIMAP1     | C11orf36  |
| PLN       | OR51D1     | SMN2      |
| CKMT1A    | EIF2AK4    | ABHD10    |
| LY6D      | KLK15      | PPP1R1B   |
| GPN2      | TMEM237    | NLRP10    |
| ZCCHC10   | LOC202781  | SNCB      |
| IL17RB    | OR52A5     | CHDH      |
| POLH      | CATSPER2P1 | TBC1D3F   |
| SERINC4   | NLRP2      | NLRP14    |
| RGS20     | NBEAL1     | SNX2      |
| FBLIM1    | C7orf33    | IL17RB    |
| GIN1      | OR51B6     | MIEN1     |
| CACNA2D3  | LOC503519  | ANO9      |
| POU3F2    | ZNF416     | SPARC     |
| C15orf62  | MRPL44     | IFT122    |
| JRK       | FABP5P3    | MRPL45    |
| MED18     | OR51M1     | LOC338651 |
| WDR55     | CKMT1A     | SPINK1    |
| DCP1A     | ZNF446     | TBC1D23   |
| POU5F1    | TRAK2      | VPS25     |
| C15orf56  | UBN2       | B4GALNT4  |
| TNKS      | OR51Q1     | SPOCK1    |
| PQLC2     | SERINC4    | WDR52     |
| ANKHD1    | ZNF701     | TMEM101   |
| GLT8D1    | TRPM8      | OR52L1    |
| PPARD     | TAS2R39    | SRP19     |
| PHGR1     | OR51I1     | CACNA2D3  |
| EIF3H     | C15orf62   | RAB11FIP4 |
| CASZ1     | ZNF83      | OR2AG2    |
| THG1L     | ATG9A      | STK10     |
| ZNF167    | TAS2R40    | DCP1A     |
| PPP1R10   | OR51I2     | GHDC      |
| LOC645212 | C15orf56   | OR52B6    |
| DGAT1     | ZNF415     | TAF7      |
| TRNAU1AP  | MLPH       | GLT8D1    |
| TMCO6     | TAS2R41    | KRTAP4-4  |
| LMOD3     | OR52D1     | OR10A2    |
| PPP2R5D   | PHGR1      | TAF9      |
| CHEK2P2   | CABP5      | EAF2      |
| GPAA1     | FAM134A    | TNS4      |
| CPSF3L    | CNPY1      | OVCH2     |

|           |           |          |
|-----------|-----------|----------|
| TRIM36    | OR52H1    | TBCA     |
| SEMA3G    | LOC645212 | LMOD3    |
| PREP      | SPHK2     | FBXL20   |
| LOC646214 | GLB1L     | PDDC1    |
| ADAM18    | LOC285889 | TCF7     |
| C1orf159  | OR52N4    | CLDND1   |
| GALNT10   | CHEK2P2   | KRTAP9-4 |
| KIF15     | MEIS3     | GALNTL4  |
| PRIM2     | SPAG16    | ZNF354A  |
| CXADRP2   | FLJ40852  | MUC13    |
| ADAM9     | OR52N5    | KRTAP4-1 |
| AURKAIP1  | LOC646214 | MRGPRG   |
| RBM22     | SLC17A7   | TCOF1    |
| ADAMTS9   | CHPF      | SEMA3G   |
| PKIB      | LOC285965 | KRTAP4-5 |
| LOC646278 | OR52N2    | KRTAP5-1 |
| ADAM7     | CXADRP2   | NR2F1    |
| MRPL20    | NAT14     | C3orf37  |
| RIOK2     | IQCA1     | KRTAP4-3 |
| PCBP4     | FAM115C   | KRTAP5-3 |
| MAPK13    | OR52E6    | TGFBI    |
| REREP3    | LOC646278 | NIT2     |
| RIPK2     | VN1R1     | KRTAP4-2 |
| AIM1L     | ALS2CR8   | KRTAP5-4 |
| PCDHGC5   | ZNF775    | THBS4    |
| ABHD6     | OR52E8    | POGLUT1  |
| PRL       | REREP3    | KRTAP3-3 |
| LOC653061 | RCN3      | IFITM5   |
| TNFRSF10D | NHEJ1     | TTC1     |
| TMEM51    | LOC285972 | BBX      |
| PCDHGC4   | OR52E4    | KRTAP2-4 |
| LRTM1     | LOC653061 | FAM99A   |
| PSMB1     | ZNF304    | UBE2B    |
| LOC653075 | FAM124B   | ADAMTS9  |
| TNFRSF10C | ATG9B     | AOC4     |
| XKR8      | OR56A3    | OR56B1   |
| PCDHGB7   | LOC653075 | UBE2D2   |
| C3orf14   | TTYH1     | PCBP4    |
| PSMB8     | TM4SF20   | ZNF830   |
| MIR626    | TPI1P2    | GVINP1   |
| TNFRSF10B | OR56A5    | VDAC1    |
| ARHGEF10L | MIR626    | PCNP     |
| PCDHGB6   | PNMAL2    | SLFN11   |
| KIAA1143  | C2orf54   | OR52K1   |
| PSMB9     | FLJ40288  | WNT8A    |
| MIR627    | OR10A6    | SENP7    |
| TNFRSF10A | MIR627    | RASL10B  |

|             |             |          |
|-------------|-------------|----------|
| VPS13D      | PRR12       | OR521I   |
| PCDHGB5     | TUBA4B      | XRCC4    |
| HHATL       | MESTIT1     | ABHD6    |
| PTK7        | OR51T1      | G6PC3    |
| ANP32AP1    | ANP32AP1    | OR51D1   |
| FGF17       | ZNF471      | ST8SIA4  |
| ATAD3A      | ARMC9       | LRTM1    |
| PCDHGB3     | TAS2R60     | ASB16    |
| WDR48       | OR51A4      | OR52A5   |
| PTPRK       | SNORD116-19 | REEP5    |
| SNORD116-19 | USP29       | C3orf14  |
| GGH         | EFHD1       | PGAP3    |
| TMEM57      | CTAGE6P     | OR51B6   |
| PCDHGB2     | OR51A2      | SERF1A   |
| SELK        | GOLGA6L6    | ISY1     |
| RGL2        | PLEKHA4     | HSPB9    |
| GOLGA6L6    | SPHKAP      | OR51M1   |
| WISP1       | TSPAN33     | NME5     |
| PANK4       | IFITM10     | HEG1     |
| PCDHGB1     | LOC727924   | ORMDL3   |
| PROK2       | ZNF71       | OR51Q1   |
| PRPH2       | WNT10A      | ENC1     |
| LOC727924   | AGBL3       | KIAA1257 |
| CPNE3       | MIR210      | TMEM106A |
| CAMK2N1     | LOC728758   | OR51I1   |
| PCDHGA11    | SCAF1       | AP3B1    |
| RNF123      | SLC19A3     | ARHGAP31 |
| REV3L       | OR6V1       | LRRC37B  |
| LOC728758   | KRTAP5-5    | OR51I2   |
| FOXH1       | OIP5-AS1    | PDLIM4   |
| ASAP3       | CACNG8      | KIAA1407 |
| PCDHGA10    | ILKAP       | NT5C3L   |
| KIF9        | OR2A12      | OR52D1   |
| TRIM27      | KRTAP5-2    | PPAP2A   |
| OIP5-AS1    | GOLGA8C     | KIAA1524 |
| CHRNA6      | CACNG7      | RFFL     |
| PNRC2       | ITM2C       | OR52H1   |
| PCDHGA9     | OR2A1       | STC2     |
| CSRNP1      | KRTAP5-6    | SELK     |
| RHAG        | PWRN1       | ZPBP2    |
| GOLGA8C     | CACNG6      | OR52N4   |
| TRPA1       | RHBDD1      | PDE8B    |
| PIGV        | FAM71F2     | PROK2    |
| PCDHGA7     | TMEM41B     | LSM12    |
| GORASP1     | PWRN2       | OR52N5   |
| RING1       | ZNF350      | EIF4EBP3 |
| PWRN1       | ING5        | EEFSEC   |

|            |              |          |
|------------|--------------|----------|
| DOK2       | STRA8        | CCDC43   |
| NBPF1      | TRIM6-TRIM34 | OR52N2   |
| PCDHGA6    | SNORD116-1   | PCDHGB4  |
| CDCP1      | TSKS         | NSUN3    |
| BRD2       | PLCD4        | CNTD1    |
| PWRN2      | KLRG2        | OR52E6   |
| ASH2L      | MIR483       | CDC23    |
| NECAP2     | SNORD116-2   | POPDC2   |
| PCDHGA5    | ZNF667       | TMEM132E |
| CCDC71     | MGC16025     | OR52E8   |
| RNF5       | WDR86        | ADAM19   |
| SNORD116-1 | SNORA3       | NFKBIZ   |
| MTMR7      | SNORD116-3   | SPACA3   |
| DNAJC11    | ELSPBP1      | OR52E4   |
| PCDHGA4    | TMEM169      | FGF18    |
| NT5DC2     | LOC349160    | ATG3     |
| RNY4       | SNORA52      | GJD3     |
| SNORD116-2 | SNORD116-4   | OR56A3   |
| CCNE2      | LIN7B        | HDAC3    |
| RCC2       | DNER         | CCDC14   |
| PCDHGA3    | GSTK1        | KRT222   |
| SLC26A6    | LOC650368    | OR56A5   |
| ROS1       | SNORD116-5   | SQSTM1   |
| SNORD116-3 | ZNF649       | NT5DC2   |
| EBAG9      | B3GNT7       | KRT40    |
| AJAP1      | KCP          | OR10A6   |
| PCDHGA2    | LOC653486    | P4HA2    |
| CAMKV      | SNORD116-6   | OR5H6    |
| RPS6KA2    | ZSCAN18      | C17orf50 |
| SNORD116-4 | SP140L       | OR51T1   |
| MYOM2      | FLJ43663     | HSPB3    |
| FAM54B     | SNORA45      | OR5H2    |
| PCDHGA1    | SNORD116-7   | SLFN13   |
| LRRC2      | MGC2752      | OR51A4   |
| RPS10      | STK11IP      | ATP6V0E1 |
| SNORD116-5 | FAM180A      | ZXDC     |
| DLGAP2     | SNORA54      | SLC35G3  |
| CTNNBIP1   | SNORD116-8   | OR51A2   |
| PCDHGB8P   | TSEN34       | ATG12    |
| FYCO1      | MOGAT1       | ZBED2    |
| RPS12      | OR2A25       | UNC45B   |
| SNORD116-6 | INS-IGF2     | IFITM10  |
| MSC        | SNORD116-9   | PTTG1    |
| C1orf63    | MBOAT7       | CEP97    |
| PCDHB15    | AGAP1        | CD300LG  |
| CCDC51     | OR2A5        | MIR210   |
| RPS18      | MUC5B        | PDLIM7   |

|             |              |            |
|-------------|--------------|------------|
| SNORD116-7  | SNORD116-10  | HSPBAP1    |
| MFHAS1      | FKRP         | KIF18B     |
| AGTRAP      | TWIST2       | KRTAP5-5   |
| PCDHB14     | PRRT4        | NREP       |
| THOC7       | MIR675       | C3orf52    |
| RREB1       | SNORD116-11  | RUNDC1     |
| SNORD116-8  | ZSCAN5A      | KRTAP5-2   |
| KCNB2       | PARD3B       | CNOT8      |
| PITHD1      | RAB19        | QTRTD1     |
| PCDHB13     | FAM99B       | LOC147093  |
| WDR82       | SNORD116-12  | KRTAP5-6   |
| RXRB        | LENG1        | RAB9BP1    |
| SNORD116-9  | DIS3L2       | CCDC48     |
| RECQL4      | OR2A7        | WIPF2      |
| MAN1C1      | LOC100133161 | TMEM41B    |
| PCDHB12     | SNORD116-13  | HAND1      |
| RTP3        | LILRP2       | NEK11      |
| VPS52       | NEU4         | KRT25      |
| SNORD116-10 | OR2A20P      | LOC440028  |
| CYP7B1      | MRPL23-AS1   | MED7       |
| NIPAL3      | SNORD116-14  | THOC7      |
| PCDHB11     | LILRA6       | TMEM99     |
| ID2B        | ICA1L        | TRIM6-TRIN |
| ATXN1       | LOC401431    | HOMER1     |
| SNORD116-11 | MIR4298      | NAA50      |
| BAG4        | SNORD116-15  | SLFN5      |
| SEPN1       | ZNF329       | MIR483     |
| PCDHB10     | AP1S3        | MYOT       |
| ATRIP       | OR2A42       | ABTB1      |
| SRSF3       | MIR210HG     | NAGS       |
| SNORD116-12 | SNORD116-16  | SNORA3     |
| ENTPD4      | TBC1D17      | ADAMTS2    |
| TP73-AS1    | SGPP2        | WDR82      |
| PCDHB9      | FLJ45340     | FAM134C    |
| NICN1       | MIR4686      | SNORA52    |
| SGK1        | SNORD116-17  | SCAMP1     |
| SNORD116-13 | ZNF419       | OR5AC2     |
| ARHGEF10    | ALS2CR12     | RHBDL3     |
| PLEKHG5     | MIR129-1     | LOC644656  |
| PCDHB8      | MIR4687      | NRG2       |
| MON1A       | SNORD116-18  | PARP9      |
| SIM1        | ISOC2        | KRT28      |
| SNORD116-14 | SPATA3       | LOC650368  |
| MTFR1       | MIR153-2     | CXCL14     |
| LRRC47      | SNORD116-20  | ID2B       |
| PCDHB7      | MYH14        | KRT24      |
| KBTBD8      | TMEM198      | LOC653486  |

|             |             |           |
|-------------|-------------|-----------|
| SKIV2L      | MIR182      | H2AFY     |
| SNORD116-15 | SNORD116-21 | ARL6      |
| LRRC14      | ZNF665      | ZNF385C   |
| PTCHD2      | ZFAND2B     | SNORA23   |
| PCDHB6      | MIR183      | SMAD5-AS1 |
| ABHD14B     | SNORD116-22 | CHCHD6    |
| SLC17A1     | ZNF552      | RDM1      |
| SNORD116-16 | CPO         | SNORA45   |
| TTC35       | MIR29A      | RNF14     |
| KIF17       | SNORD116-23 | C3orf26   |
| PCDHB4      | ZNF671      | GAS2L2    |
| C3orf39     | MDH1B       | SNORA54   |
| SLC22A1     | MIR29B1     | CARTPT    |
| SNORD116-17 | SNORD116-24 | KBTBD8    |
| RIMS2       | ZNF613      | C17orf66  |
| HES4        | FBXO36      | SNORD97   |
| PCDHB3      | MIR96       | SNCAIP    |
| UCN2        | SNORD116-25 | SLC12A8   |
| SLC22A3     | ZNF702P     | C17orf105 |
| SNORD116-18 | MTERFD2     | INS-IGF2  |
| ST18        | LOC407835   | TTC37     |
| GRHL3       | SNORD115-2  | RETNLB    |
| PCDHB2      | ZNF606      | FAM171A2  |
| ZNF502      | UBE2F       | MUC5B     |
| SLC22A2     | AKR1B15     | CLINT1    |
| SNORD116-20 | SNORD116-26 | CCDC54    |
| TOX         | ZNF614      | C17orf104 |
| IL22RA1     | OTOS        | LOC729013 |
| PCDHAC2     | CTAGE15P    | PCDHGA8   |
| RFT1        | SNORD116-27 | ABHD14B   |
| SMPD2       | FUZ         | PIGW      |
| SNORD116-21 | MYEOV2      | MIR675    |
| MTSS1       | OR2A9P      | PCDHA9    |
| MIIP        | SNORD115-3  | MINA      |
| PCDHAC1     | ZNF611      | C17orf78  |
| ZBTB47      | OR6B3       | MRVI1-AS1 |
| SNRPC       | OR2A2       | ZFYVE16   |
| SNORD116-22 | SNORD115-4  | GPR128    |
| PTDSS1      | MED25       | LOC284100 |
| CELA2A      | FAM117B     | FAM99B    |
| PCDHA13     | MIR335      | MATR3     |
| ACTR8       | SNORD115-5  | DIRC2     |
| SOD2        | BCL2L12     | CISD3     |
| SNORD116-23 | LOC150935   | LOC100133 |
| PHYHIP      | ARHGEF35    | MAML1     |
| GPATCH3     | SNORD115-6  | C3orf15   |
| PCDHA12     | GRWD1       | GSDMA     |

|             |             |            |
|-------------|-------------|------------|
| SLC25A26    | PKI55       | MRPL23-AS  |
| SOX4        | GIMAP6      | KIAA0141   |
| SNORD116-24 | SNORD115-7  | PHLDB2     |
| RB1CC1      | ZNF541      | KRT42P     |
| PRDM16      | C2orf67     | MIR4298    |
| PCDHA11     | WEE2        | JAKMIP2    |
| ZNF501      | SNORD115-8  | LOC90246   |
| SRF         | SYT3        | PTRF       |
| SNORD116-25 | LOC151171   | MIR4299    |
| ZNF623      | MIR490      | PJA2       |
| PLA2G2F     | SNORD115-9  | C3orf25    |
| PCDHA10     | AKT1S1      | KLHL10     |
| GPR62       | LOC151174   | MTRNR2L8   |
| SRPK1       | ZNF862      | DDX46      |
| SNORD115-2  | SNORD115-10 | BOC        |
| KIAA0196    | ZNF528      | C17orf65   |
| CEP85       | METTL21A    | MIR210HG   |
| PCDHA8      | LOC645249   | GFPT2      |
| FAM3D       | SNORD115-11 | FAM55C     |
| SSR1        | BRSK1       | MSL1       |
| SNORD116-26 | CCNYL1      | MIR4686    |
| KBTBD11     | LOC646329   | SLC23A1    |
| NMNAT1      | SNORD115-12 | RFT1       |
| PCDHA7      | SNORD35B    | KRT27      |
| LYZL4       | ALS2CR11    | MIR4485    |
| ELOVL4      | C7orf73     | GNPDA1     |
| SNORD116-27 | SNORD115-13 | ACTR8      |
| HLA1        | ZNF347      | SLFN14     |
| VWA1        | CCDC140     | MIR4687    |
| PCDHA6      | ACTR3C      | SRA1       |
| KBTBD5      | SNORD115-14 | TXNRD3     |
| T           | ZNF577      | FLJ43826   |
| SNORD115-3  | SLC23A3     | EDIL3      |
| SORBS3      | MIR592      | OSBPL11    |
| PINK1       | SNORD115-15 | STAC2      |
| PCDHA5      | SUV420H2    | COL4A3BP   |
| TMEM42      | LOC151300   | SLC25A26   |
| TAF11       | MIR593      | CCL14-CCL1 |
| SNORD115-4  | SNORD115-16 | RAD50      |
| TRIB1       | C19orf48    | LRRC58     |
| PRAMEF1     | GPBAR1      | KRT26      |
| PCDHA4      | MIR595      | KIF20A     |
| IQCF1       | SNORD115-17 | GPR62      |
| MAP3K7      | ZBTB45      | CCL4L2     |
| SNORD115-5  | SLC16A14    | G3BP1      |
| HRSP12      | LOC728377   | CCDC58     |
| PRAMEF2     | SNORD115-18 | C17orf98   |

|             |              |           |
|-------------|--------------|-----------|
| PCDHA3      | ZNF587       | LHFPL2    |
| GLYCTK      | LOC151475    | FAM3D     |
| TAP1        | LOC728743    | LOC388387 |
| SNORD115-6  | SNORD115-19  | CWC27     |
| NPM2        | FIZ1         | ZPLD1     |
| NADK        | LINC00471    | CCDC103   |
| PCDHA2      | LOC730441    | APBB3     |
| PPM1M       | SNORD115-20  | CD200R1   |
| TAP2        | GALP         | ARL5C     |
| SNORD115-7  | LOC151484    | CCNO      |
| DLC1        | LUZP6        | DCBLD2    |
| PHACTR4     | SNORD115-21  | KRT39     |
| PCDHA1      | SIGLEC10     | TNIP1     |
| C3orf49     | MSL3P1       | TPRA1     |
| TAPBP       | MIR671       | C17orf102 |
| SNORD115-8  | SNORD115-22  | GNB2L1    |
| NDRG1       | SIGLEC12     | UROC1     |
| C1orf135    | WDR69        | MIR193A   |
| VTRNA1-3    | LOC100124692 | NSA2      |
| SNTN        | SNORD115-23  | NUDT16    |
| TBCC        | ZNF628       | TBC1D3B   |
| SNORD115-9  | C2orf57      | FST       |
| PGCP        | LOC100128264 | COL6A6    |
| EFHD2       | SNORD115-25  | TBC1D3C   |
| VTRNA1-2    | KIR3DX1      | SLU7      |
| SYNPR       | PIKFYVE      | FAM172BP  |
| TBP         | CTAGE4       | CCL3L3    |
| SNORD115-10 | SNORD115-26  | POLR3G    |
| SPAG11B     | ZNF551       | IQCF1     |
| MMEL1       | LOC200726    | LOC440434 |
| VTRNA1-1    | LOC100128822 | RGS14     |
| C3orf45     | SNORD115-29  | GLYCTK    |
| TCF19       | ZNF616       | GPR179    |
| SNORD115-11 | TIGD1        | PLK2      |
| LYPLA1      | LOC100129148 | PPM1M     |
| RSG1        | SNORD115-30  | FBXO47    |
| NMUR2       | ZNF766       | IQGAP2    |
| ASB14       | LOC200772    | C3orf49   |
| TCF21       | LOC100130705 | ARGFXP2   |
| SNORD115-12 | SNORD115-31  | SEC24A    |
| NCOA2       | ZNF468       | SNTN      |
| OR4F5       | CCDC108      | SNORA21   |
| FEM1C       | LOC100130880 | CPLX2     |
| FAM19A4     | SNORD115-32  | SYNPR     |
| TCP1        | ZNF160       | KRTAP4-11 |
| SNORD115-13 | C2orf72      | C5orf4    |
| ARFGEF1     | LOC100131176 | RPL32P3   |

|             |              |           |
|-------------|--------------|-----------|
| MUL1        | SNORD115-33  | TBC1D3G   |
| C5orf15     | CTU1         | FAM114A2  |
| CCDC12      | CXXC11       | H1FOO     |
| TCP10       | LOC100132707 | SNORD7    |
| SNORD115-14 | SNORD115-34  | BRD8      |
| COLEC10     | ZNF835       | ASB14     |
| NOL9        | UNC80        | MIR632    |
| CDC42SE2    | LOC100134229 | TCERG1    |
| PPP4R2      | SNORD115-35  | DTX3L     |
| TCP11       | ZNF765       | KRTAP4-8  |
| SNORD115-15 | RUFY4        | BTNL3     |
| KHDRBS3     | LOC100134713 | FAM19A4   |
| LIN28A      | SNORD115-36  | KRTAP2-2  |
| TRPC7       | NLRP12       | HNRNPA0   |
| CCDC13      | DUSP28       | LOC151658 |
| TCTE3       | LOC100287482 | KRTAP9-1  |
| SNORD115-16 | SNORD115-37  | LMAN2     |
| DCTN6       | MYADM        | DPPA2     |
| AGMAT       | ESPNL        | TBC1D3    |
| ZNF608      | MOXD2P       | SPINK5    |
| XIRP1       | SNORD115-38  | CCDC80    |
| PPP1R11     | ZNF845       | TBC1D3H   |
| SNORD115-17 | ECEL1P2      | SMA4      |
| PNMA2       | ZNF783       | BTLA      |
| LINC00115   | SNORD115-39  | LOC730755 |
| KCTD16      | CCDC114      | SMA5      |
| PRICKLE2    | LOC348761    | PPP4R2    |
| DYNLT1      | MIR548F3     | SNORD124  |
| SNORD115-18 | SNORD115-40  | SOX30     |
| ADAM28      | ACPT         | ROPN1B    |
| MORN1       | C2orf62      | MIR365B   |
| SEMA6A      | MIR548I4     | ESM1      |
| TTC21A      | SNORD115-41  | C3orf22   |
| TEAD3       | CGB5         | LOC100130 |
| SNORD115-19 | RBM44        | KIF3A     |
| POP1        | MIR548F4     | SPICE1    |
| FAM110D     | SNORD115-42  | LOC100131 |
| PCDHB16     | CGB7         | ADAMTS6   |
| C3orf67     | AQP12A       | NUDT16P1  |
| TFAP2A      | MIR548T      | KRTAP4-9  |
| SNORD115-20 | SNORD115-43  | MGAT4B    |
| AP3M2       | LRRC4B       | LOC152225 |
| DHDDS       | KLHL30       | KRTAP4-7  |
| HMHB1       | MTRNR2L6     | B4GALT7   |
| KCTD6       | SNORD115-44  | IGSF11    |
| TFAP2B      | LENG9        | C17orf96  |
| SNORD115-21 | PLEKHM3      | SYNPO     |

|             |               |           |
|-------------|---------------|-----------|
| COPS5       | MIR3907       | C3orf30   |
| GPR157      | SNORD116-28   | LOC100190 |
| EPB41L4A    | CGB8          | RHOBTB3   |
| KLHDC8B     | C2orf80       | PARP15    |
| THBS2       | LOC100505483  | MIR2117   |
| SNORD115-22 | SNORD116-29   | RNF44     |
| RBPMS       | GNG8          | DNAJB8    |
| SPSB1       | RESP18        | MIR2909   |
| ERAP2       | LOC100506585  | ABLIM3    |
| LOC201617   | SNORD115-48   | GPR156    |
| NR2E1       | BIRC8         | LOC100505 |
| SNORD115-23 | C2orf82       | ELL2      |
| WWP1        | LOC100507421  | CHST13    |
| GLTPD1      | SNORD115-24   | LRRC3C    |
| SIL1        | FAM71E1       | SV2C      |
| DNAH12      | OR6B2         | PRICKLE2  |
| TNF         | GIMAP1-GIMAP5 | KRTAP16-1 |
| SNORD115-25 | SNORD115-27   | HMGXB3    |
| STMN2       | RDH13         | KBTBD12   |
| ZNF436      | DYTN          | LOC100505 |
| ARAP3       | MIR4468       | TBC1D9B   |
| PDE12       | SNORD115-28   | ALG1L     |
| TNFAIP3     | PTH2          | AA06      |
| SNORD115-26 | ASB18         | ARHGAP26  |
| PTP4A3      | SNORD115-45   | C3orf67   |
| TAS1R2      | ZIM3          | SLFN12L   |
| FBXL17      | FLJ43879      | FSTL4     |
| FAM116A     | SNORD115-47   | KCTD6     |
| TNXA        | SIGLEC11      | RAD51L3-R |
| SNORD115-29 | VWC2L         | MRPS27    |
| ERLIN2      | MIR147B       | ARL13B    |
| TAS1R1      | CGB1          | MIR4728   |
| YTHDC2      | MIR149        | ATP10B    |
| ZNF620      | LOC100128714  | DHFRL1    |
| TNXB        | CGB2          | MIR4726   |
| SNORD115-30 | MIR153-1      | N4BP3     |
| LZTS1       | LOC100131089  | GABRR3    |
| OR4F16      | LMTK3         | MIR4734   |
| GRAMD3      | MIR26B        | SEPT8     |
| ALS2CL      | ANKRD63       | PTPLB     |
| TPBG        | LENG8         | MIR4724   |
| SNORD115-31 | DNAJB3        | FAF2      |
| PROSC       | HERC2P7       | LOC201617 |
| ACTL8       | KIR3DL3       | MIR4727   |
| PCYOX1L     | MIR375        | PPIP5K2   |
| TMIE        | GOLGA8F       | DNAH12    |
| TPD52L1     | ZNF837        | MIR4725   |

|             |                |           |
|-------------|----------------|-----------|
| SNORD115-32 | SNORA41        | WWC1      |
| RNF139      | GOLGA8DP       | PDE12     |
| CCNL2       | CLDND2         | FBXW11    |
| SH3TC2      | LOC643387      | FAM116A   |
| C3orf64     | JMJD7          | ACSL6     |
| TPMT        | ZNF816         | TIGIT     |
| SNORD115-33 | PRR21          | PHF15     |
| ZHX1        | PLA2G4B        | KIAA2018  |
| SH3BGRL3    | ZNF543         | LARP1     |
| SAP30L      | LOC646324      | CADM2     |
| FBXW12      | ULK4P2         | PPWD1     |
| CRISP2      | COX6B2         | ZDHHC23   |
| SNORD115-34 | LOC646736      | HARS2     |
| PUF60       | LOC100288615   | LOC255025 |
| SESN2       | OSCAR          | OTP       |
| TXNDC15     | PRSS56         | NUP210P1  |
| ENTPD3-AS1  | LOC100288637   | SKIV2L2   |
| TSPYL1      | ZNF813         | COL6A5    |
| SNORD115-35 | AQP12B         | ZNF346    |
| ZHX2        | LOC100289656   | PLCXD2    |
| ESPN        | JOSD2          | SSBP2     |
| MCTP1       | SNORA75        | GCET2     |
| ZNF619      | MIR1233-1      | BHMT2     |
| TTK         | IZUMO2         | LSAMP-AS3 |
| SNORD115-36 | SCARNA6        | TNFAIP8   |
| DENND3      | MIR1282        | C3orf64   |
| TAS1R3      | CPT1C          | PART1     |
| NDFIP1      | SCARNA5        | LOC285205 |
| ZNF621      | MIR1233-2      | GEMIN5    |
| TUBB2A      | ALDH16A1       | EPHA6     |
| SNORD115-37 | SNORD11        | PCDHGA12  |
| XPO7        | MIR4310        | DNAJB8-AS |
| ATAD3B      | NTN5           | LRRTM2    |
| FBXO38      | SNORD70        | C3orf38   |
| CCDC66      | MIR3942        | FAM169A   |
| TULP1       | NLRP13         | RABL3     |
| SNORD115-38 | D2HGDH         | CCDC69    |
| TRIM35      | LOC100505648   | CCDC66    |
| TMEM222     | NLRP8          | PCDHB5    |
| YIPF5       | LOC728323      | SLC9A10   |
| C3orf23     | LOC100507466   | FBXL21    |
| UTRN        | NLRP5          | LOC285359 |
| SNORD115-39 | DIRC3          | KLHL3     |
| ZC3H3       | SERF2-C15ORF63 | LOC285401 |
| PLEKHN1     | ZNF787         | TSPAN17   |
| TIGD6       | SNORD11B       | ILDR1     |
| ZNF660      | MIR4509-1      | OR4F3     |

|             |              |           |
|-------------|--------------|-----------|
| VARS        | ZFP28        | EIF4E3    |
| SNORD115-40 | LOC100129175 | HAVCR1    |
| EFR3A       | MIR4509-2    | RAB43     |
| USP48       | VSIG10L      | SNORD63   |
| SPRY4       | PP14571      | LOC339874 |
| FLJ39534    | MIR4508      | SNORA74A  |
| VEGFA       | LOC147646    | H1FX-AS1  |
| SNORD115-41 | LOC100130451 | RNU5E-1   |
| RRS1        | MIR4510      | LOC344595 |
| NBPF3       | LINC00085    | RNU5D-1   |
| NUDT12      | LOC100286922 | TMPRSS7   |
| LOC285401   | MIR4509-3    | CYFIP2    |
| EZR         | ZNF480       | CD200R1L  |
| SNORD115-42 | MIR1471      | PKD2L2    |
| SULF1       | MIR4715      | LNP1      |
| ZDHHC18     | ZNF534       | UQCRQ     |
| SLC4A9      | MIR1244-1    | CCDC37    |
| EIF4E3      | TMCO5B       | AFF4      |
| VIP         | ZNF578       | SPATA12   |
| SNORD115-43 | MIR548F2     | PRELID1   |
| RHOBTB2     | ERVV-1       | TMEM110   |
| SLC25A33    | LOC100329109 | IL17B     |
| SLC25A2     | LOC147670    | IQCF2     |
| CCDC36      | BOK-AS1      | DIMT1     |
| ZNF76       | C19orf18     | IQCF5     |
| SNORD115-44 | MIR1244-3    | MAT2B     |
| ARC         | ZNF418       | MUSTN1    |
| DDI2        | MIR1244-2    | SLC27A6   |
| SPATA9      | ZNF417       | VGLL3     |
| PRSS42      | MIR3131      | SNX24     |
| ZNF165      | ZNF548       | IQCF3     |
| SNORD116-28 | MIR4268      | MRPL22    |
| BOP1        | TMEM190      | LOC401074 |
| LZIC        | MIR3130-1    | PCDHB1    |
| TSSK1B      | TMC4         | FLJ22763  |
| ZNF445      | MIR3130-2    | DMGDH     |
| TRIM26      | LOC147804    | FLJ25363  |
| SNORD116-29 | MIR2355      | TLX3      |
| DDHD2       | ZNF524       | OR5K2     |
| TRIM63      | MIR3132      | KCNIP1    |
| PCDHB19P    | ZNF784       | OR5H14    |
| SPATA12     | MIR4269      | ZNF354C   |
| ZNF184      | CCDC155      | OR5H15    |
| SNORD115-48 | LOC100507443 | TMED7     |
| KIF13B      | DACT3        | OR5K3     |
| C1orf170    | UBE2F-SCLY   | ISOC1     |
| PCBD2       | NLRP4        | OR5K4     |

|              |           |           |
|--------------|-----------|-----------|
| C3orf77      | MIR4439   | RPL26L1   |
| ZNF187       | ZNF542    | MIRLET7G  |
| SNORD115-24  | MIR4776-1 | SAR1B     |
| PSD3         | ZNF582    | MIR135A1  |
| CROCCP2      | MIR4777   | C5orf45   |
| PSD2         | ZNF583    | MIR198    |
| C3orf62      | MIR2467   | DCTN4     |
| ZNF192       | CDC42EP5  | FAM19A1   |
| SNORD115-27  | MIR4775   | IPO11     |
| ZFPM2        | ZNF836    | STX19     |
| SYTL1        | MIR4440   | MZB1      |
| ANKRD32      | ZNF610    | IQCF6     |
| TMEM110      | MIR4786   | PAIP2     |
| ZNF193       | ZNF600    | C3orf78   |
| SNORD115-28  | MIR4776-2 | CDKL3     |
| HEY1         | ZNF320    | LOC440970 |
| IGSF21       | MIR4441   | PCDH12    |
| C5orf32      | ZNF497    | ARGFX     |
| PRSS45       | ZNF550    | GCNT4     |
| ZNF204P      | ZNF579    | TMEM30C   |
| SNORD115-45  | ZNF114    | FAM13B    |
| TRAM1        | ZNF525    | ALG1L2    |
| SNHG12       | SPACA4    | FAM53C    |
| MEGF10       | NLRP7     | TXNRD3NB  |
| AMIGO3       | C19orf76  | REEP2     |
| PTP4A1       | ZNF584    | COL6A4P2  |
| SNORD115-47  | ZSCAN4    | PRR16     |
| LEPROTL1     | NLRP11    | FLJ20518  |
| KIAA1751     | TMEM86B   | COMMD10   |
| SPINK7       | PRR24     | LOC653712 |
| ZNF662       | ZNF549    | POLK      |
| DEK          | NAPSB     | LINC00488 |
| MIR147B      | IL4I1     | DDX41     |
| SCRIB        | SSC5D     | SNORA7B   |
| KIAA2013     | ZNF547    | NOP16     |
| HAVCR2       | ZIK1      | SNORD19   |
| CDHR4        | ZNF776    | LARS      |
| ALDH5A1      | ZSCAN1    | FAM86DP   |
| LOC100128714 | TPRX1     | CXXC5     |
| KIAA0146     | MAMSTR    | SNORD69   |
| THAP3        | IZUMO1    | HMP19     |
| C5orf62      | C19orf63  | MIR548A2  |
| FAM212A      | MGC45922  | UIMC1     |
| PRRC2A       | KLK9      | MIR548A3  |
| LOC100131089 | SIGLECP3  | RAPGEF6   |
| SLC39A14     | C19orf75  | MIR567    |
| C1orf201     | ZNF615    | ERAP1     |

|              |           |            |
|--------------|-----------|------------|
| TSLP         | ZNF841    | MIR568     |
| IQCF2        | LOC284379 | KDM3B      |
| BAG6         | VSTM1     | GXYLT2     |
| ANKRD63      | TMEM150B  | PHAX       |
| LRRC6        | FAM71E2   | FAM86HP    |
| UBXN11       | VN1R2     | RAB24      |
| FCHSD1       | VN1R4     | ESRG       |
| IQCF5        | NLRP9     | PELO       |
| GPANK1       | C19orf81  | LOC100009  |
| HERC2P7      | ZNF677    | RBM27      |
| LY96         | RFPL4A    | SNORD19B   |
| C1orf158     | ZSCAN5B   | NEURL1B    |
| C5orf30      | ZSCAN22   | LOC100125  |
| MUSTN1       | ZNF530    | DHX29      |
| DDX39B       | C19orf51  | C3orf74    |
| GOLGA8F      | LILRA5    | FLJ11235   |
| SGK3         | ZNF773    | LOC100129  |
| FBXO44       | LOC386758 | DDX4       |
| LYRM7        | ZNF808    | ZBTB20-AS1 |
| IQCF3        | ZNF761    | FAM193B    |
| ABHD16A      | TMEM238   | ZNF717     |
| GOLGA8DP     | ZNF470    | SGTB       |
| RAD54B       | ZNF749    | LOC100287  |
| ATPIF1       | ZNF324B   | ARL15      |
| SLC25A46     | ZNF805    | FRG2C      |
| LOC401074    | ZNF321P   | PCDHB18    |
| SLC39A7      | SIGLEC16  | MIR1284    |
| JMJD7        | FLJ26850  | PCDHB17    |
| DCAF13       | ZNF880    | MIR1280    |
| CROCCP3      | ZNF772    | TMED9      |
| CDKN2AIPNL   | IGLON5    | MIR548I1   |
| MIRLET7G     | MIRLET7E  | ZCCHC10    |
| HSD17B8      | MIR125A   | MIR1324    |
| PLA2G4B      | MIR150    | CDHR2      |
| RNF19A       | MIR99B    | LOC100302  |
| FHAD1        | TARM1     | GIN1       |
| TIMD4        | MIR371A   | MIR548G    |
| MIR135A1     | MIR372    | WDR55      |
| OR2H2        | MIR373    | MIR3136    |
| ULK4P2       | A1BG-AS1  | ANKHD1     |
| GPR124       | DPRX      | MIR4272    |
| LOC115110    | DUXA      | CCDC99     |
| ZNF300       | ASPDH     | MIR4273    |
| MIR138-1     | MIR512-1  | THG1L      |
| RDBP         | MIR512-2  | MIR3921    |
| LOC100288615 | MIR498    | AGGF1      |
| KIAA1429     | MIR520E   | MIR3938    |

|              |           |            |
|--------------|-----------|------------|
| RAB42        | MIR515-1  | WDR41      |
| MYOZ3        | MIR519E   | PVRL3-AS1  |
| MIR191       | MIR520F   | TMCO6      |
| LST1         | MIR515-2  | IGSF11-AS1 |
| LOC100288637 | MIR519C   | TRIM36     |
| C8orf71      | MIR520A   | MYLK-AS1   |
| FAM46B       | MIR526B   | GALNT10    |
| PRDM6        | MIR519B   | IQCF4      |
| FAM19A1      | MIR525    | NHP2       |
| PLA2G7       | MIR523    | LOC100506  |
| LOC100289656 | MIR518F   | RBM22      |
| RGS22        | MIR520B   | LOC100507  |
| RBP7         | MIR518B   | RIOK2      |
| FTMT         | MIR526A1  | LOC100507  |
| FLJ33065     | MIR520C   | DEPDC1B    |
| TFEB         | MIR518C   | ADAMTS9-1  |
| MIR1233-1    | MIR524    | BDP1       |
| FBXL6        | MIR517A   | ABHD14A-1  |
| ACAP3        | MIR519D   | RNF130     |
| FNIP1        | MIR521-2  | TMEM110-1  |
| TMEM89       | MIR520D   | ERBB2IP    |
| STL          | MIR517B   | ISY1-RAB43 |
| MIR1282      | MIR520G   | PCDHGC5    |
| PTTG3P       | MIR516B2  | MIR4787    |
| UBE2J2       | MIR526A2  | PCDHGC4    |
| SLC35A4      | MIR518E   | MIR4795    |
| IQCF6        | MIR518A1  | PCDHGB7    |
| EPM2A        | MIR518D   | MIR4796    |
| MIR1233-2    | MIR516B1  | PCDHGB6    |
| FBXO25       | MIR518A2  | MIR4444-1  |
| C1orf172     | MIR517C   | PCDHGB5    |
| EPB41L4A-AS1 | MIR520H   | MIR4446    |
| C3orf78      | MIR521-1  | PCDHGB3    |
| HIST1H4I     | MIR522    | LOC100652  |
| MIR4310      | MIR519A1  | PCDHGB2    |
| FGF20        | MIR527    | PCDHGB1    |
| LRRC38       | MIR516A1  | PCDHGA11   |
| MARCH3       | MIR516A2  | PCDHGA10   |
| MIR425       | MIR519A2  | PCDHGA9    |
| HIST1H2AI    | KLKP1     | PCDHGA7    |
| MIR3942      | LOC646508 | PCDHGA6    |
| SNORA72      | SBK2      | PCDHGA5    |
| AADACL3      | LOC646862 | PCDHGA4    |
| LEAP2        | SEC1      | PCDHGA3    |
| SNORA6       | SNORD23   | PCDHGA2    |
| HIST1H2AK    | SNORD88A  | PCDHGA1    |
| LOC100505648 | SNORD88B  | PCDHGB8P   |

|                |              |          |
|----------------|--------------|----------|
| SNORD54        | SNORD88C     | PCDHB15  |
| PUSL1          | MIR643       | PCDHB14  |
| SCGB3A2        | RPL13AP5     | PCDHB13  |
| LOC644714      | CEACAM18     | PCDHB12  |
| HIST1H2AJ      | SHISA7       | PCDHB11  |
| LOC100507466   | FLJ30403     | PCDHB10  |
| OPLAH          | ZNF814       | PCDHB9   |
| B3GALT6        | SIGLEC14     | PCDHB8   |
| SLCO6A1        | MIMT1        | PCDHB7   |
| SPINK8         | MIR935       | PCDHB6   |
| HIST1H2AL      | SNAR-G1      | PCDHB4   |
| SERF2-C15ORF63 | SNAR-F       | PCDHB3   |
| PABPC1         | SNAR-A1      | PCDHB2   |
| IFFO2          | SNAR-A2      | PCDHAC2  |
| PPARGC1B       | SNAR-A12     | PCDHAC1  |
| C3orf71        | LOC100128252 | PCDHA13  |
| HIST1H2AC      | LOC100128398 | PCDHA12  |
| MIR4509-1      | LOC100129083 | PCDHA11  |
| KCNV1          | SGK110       | PCDHA10  |
| TPRG1L         | BSPH1        | PCDHA8   |
| PRRC1          | LOC100131691 | PCDHA7   |
| LOC646498      | PEG3-AS1     | PCDHA6   |
| HIST1H2AB      | SNAR-A3      | PCDHA5   |
| MIR4509-2      | SNAR-A5      | PCDHA4   |
| STAU2          | SNAR-A7      | PCDHA3   |
| FAM213B        | SNAR-A11     | PCDHA2   |
| ZNF474         | SNAR-A9      | PCDHA1   |
| FLJ20518       | SNAR-A4      | VTRNA1-3 |
| HIST1H2AM      | SNAR-A6      | VTRNA1-2 |
| MIR4508        | SNAR-A8      | VTRNA1-1 |
| MTBP           | SNAR-A13     | NMUR2    |
| MYOM3          | SNAR-A10     | FEM1C    |
| POU5F2         | SNAR-B2      | C5orf15  |
| SNORD19        | SNAR-C2      | CDC42SE2 |
| HIST1H2BG      | SNAR-C4      | TRPC7    |
| MIR4510        | SNAR-E       | KIAA1191 |
| DKK4           | SNAR-C5      | ERGIC1   |
| KLHDC7A        | SNAR-B1      | CLK4     |
| AFAP1L1        | SNAR-C1      | ODZ2     |
| FAM86DP        | SNAR-C3      | CNOT6    |
| HIST1H2BL      | SNAR-D       | NLN      |
| MIR4509-3      | SNAR-G2      | ZNF608   |
| EIF2C2         | SNAR-A14     | KCTD16   |
| VWA5B1         | ERVV-2       | SEMA6A   |
| GRPEL2         | ZNF587B      | ARRDC3   |
| SNORD69        | MIR1283-2    | ZSWIM6   |
| HIST1H2BN      | MIR1323      | PCDHB16  |

|              |                |          |
|--------------|----------------|----------|
| MIR4715      | MIR1283-1      | ANKRA2   |
| LSM1         | MIR3191        | HMHBB1   |
| UBXN10       | MIR3190        | C5orf54  |
| LSM11        | MIR320E        | MCCC2    |
| MIR548A2     | MIR4324        | EPB41L4A |
| HIST1H2BM    | LOC100505681   | CENPK    |
| TMC05B       | LOC100505812   | ERAP2    |
| ADAMDEC1     | LOC100506012   | RGNEF    |
| ARHGEF19     | LOC100506033   | NSD1     |
| GPR151       | LOC100506068   | SIL1     |
| MIR564       | LOC100507003   | GMCL1P1  |
| HIST1H2BF    | ZNF865         | ARAP3    |
| BHLHE22      | ZNF816-ZNF321P | RMND5B   |
| ACTRT2       | MIR4754        | FBXL17   |
| STARD4       | MIR4752        | YTHDC2   |
| GXYLT2       | MIR371B        | RANBP17  |
| HIST1H2BE    | MIR4749        | SLC30A5  |
| MRPS28       | MIR4750        | CENPH    |
| MIB2         | MIR4751        | GPBP1    |
| WDR36        |                | GRAMD3   |
| FAM198A      |                | PCYOX1L  |
| HIST1H2BH    |                | CCNJL    |
| COMMD5       |                | SH3TC2   |
| C1orf127     |                | PANK3    |
| ZNF300P1     |                | PARP8    |
| CCR2         |                | SAP30L   |
| HIST1H2BI    |                | ANKRD55  |
| MRPL13       |                | TXNDC15  |
| SAMD11       |                | MCTP1    |
| SOWAHA       |                | PTCD2    |
| ESRG         |                | BTNL8    |
| HIST1H2BC    |                | DOK3     |
| ATAD2        |                | ELOVL7   |
| LOC148413    |                | C5orf44  |
| SHROOM1      |                | ZFP2     |
| SNORD19B     |                | RUFY1    |
| HIST1H2BO    |                | CPEB4    |
| ASAP1-IT1    |                | PRR7     |
| PHF13        |                | NDFIP1   |
| C5orf24      |                | OR4F16   |
| C3orf74      |                | FBXO38   |
| HIST1H3A     |                | YIPF5    |
| MRPL15       |                | TRIM7    |
| CCDC27       |                | TIGD6    |
| C5orf20      |                | SPRY4    |
| LOC100128640 |                | MXD3     |
| HIST1H3D     |                | NUDT12   |

CNOT7  
C1orf213  
SLC36A2  
NRADDP  
HIST1H3C  
CPSF1  
PDIK1L  
SPINK13  
ZNF717  
HIST1H3E  
PURG  
C1orf64  
CEP120  
LOC100132146  
HIST1H3I  
LRP12  
SLC2A7  
SLC25A48  
BSN-AS2  
HIST1H3G  
RRM2B  
CALML6  
SRFBP1  
PRSS46  
HIST1H3J  
CYHR1  
IL28RA  
LOC153469  
LOC100287879  
HIST1H3H  
ASAP1  
FAM43B  
ZMAT2  
FRG2C  
HIST1H3B  
MTERFD1  
PAQR7  
ARSK  
MIR1284  
HIST1H4A  
PI15  
FAM76A  
FAM81B  
MIR1324  
HIST1H4D  
FAM135B  
TMEM201

SLC4A9  
ATG10  
SLC25A2  
SPATA9  
TSSK1B  
FAM172A  
PCDHB19P  
GPR98  
PCBD2  
UTP15  
ZCCHC9  
PSD2  
ANKRD32  
THOC3  
ZBED3  
GFM2  
C5orf32  
MEGF10  
SPINK7  
SPZ1  
TRIM52  
HAVCR2  
AGXT2L2  
C5orf62  
TSLP  
FCHSD1  
UNC5A  
C5orf30  
LYRM7  
TRIM41  
SLC25A46  
BOD1  
CDKN2AIPN  
COL23A1  
TIMD4  
NDUFAF2  
ZNF300  
MYOZ3  
UBTD2  
MRPS36  
ATP6AP1L  
SCGB3A1  
PRDM6  
FTMT  
SFXN1  
FNIP1  
SNX18

CCDC112  
MIR1226  
HIST1H4F  
ZC2HC1A  
C1orf86  
PPP1R2P3  
MIR711  
HIST1H4K  
PHF20L1  
C1orf126  
FAM71B  
MIR3136  
HIST1H4J  
LACTB2  
ATAD3C  
PRELID2  
MIR4272  
HIST1H4C  
FAM82B  
AKR7L  
SH3RF2  
MIR4271  
HIST1H4H  
ZNF706  
LOC254099  
PLAC8L1  
MIR4273  
HIST1H4B  
GOLGA7  
TTLL10  
DCP2  
MIR3938  
HIST1H4E  
VPS28  
TMCO4  
LIX1  
KRBOX1  
HIST1H4L  
ZDHHC2  
ZNF683  
ADAMTS19  
IQCF4  
HIST1H4G  
FAM203A  
MDS2  
SPATA24  
LOC100506994

SLC35A4  
GPRIN1  
PWWP2A  
C1QTNF2  
EPB41L4A-  
MARCH3  
FCHO2  
RAB3C  
LYSMD3  
LEAP2  
SCGB3A2  
ZNF354B  
C5orf35  
IL31RA  
EMB  
SLCO6A1  
C5orf47  
PPARGC1B  
PRRC1  
JMY  
C5orf58  
ZNF474  
OR2Y1  
POU5F2  
AFAP1L1  
GRPEL2  
TMEM171  
TMEM174  
LSM11  
POC5  
GPR151  
STARD4  
WDR36  
ZNF300P1  
NUDCD2  
UBLCP1  
ACOT12  
SOWAHA  
SHROOM1  
C5orf24  
SREK1  
C5orf20  
SLC38A9  
SLC36A2  
SPINK13  
C5orf41  
CEP120

STX7  
KCNK9  
NPHP4  
DNAJC18  
LOC100507062  
CMAHP  
SLC25A37  
FAM41C  
C5orf27  
ADAMTS9-AS2  
DHX16  
C8orf55  
LOC284632  
STK32A  
ABHD14A-ACY1  
SUPT3H  
UBR5  
LOC284661  
AQPEP  
TMEM110-MUSTN1  
PEX3  
SCARA3  
SLC25A34  
SLC36A1  
MIR4793  
GCM1  
FAM49B  
ESPNP  
KIAA0825  
MIR4787  
DDO  
AZIN1  
C1orf174  
GPR150  
MIR4444-1  
RNASET2  
ATP6V1H  
KLHL17  
DTWD2  
MIR4443  
KCNK5  
OTUD6B  
TMEM240  
RELL2  
LOC100652759  
STX11  
TMEM66

SLC25A48  
TMEM167A  
MBLAC2  
TMEM161E  
SRFBP1  
LOC153469  
ZMAT2  
MARVELD2  
BTNL9  
ARSK  
FAM81B  
CCDC112  
PPP1R2P3  
FAM71B  
PRELID2  
SH3RF2  
PLAC8L1  
RNF145  
MIER3  
CDC20B  
PAPD4  
DCP2  
LIX1  
ZNF366  
FAM151B  
S100Z  
ADAMTS19  
HIGD2A  
SPATA24  
DNAJC18  
FAM153B  
LOC202181  
CCDC125  
C5orf27  
GAPT  
CMYA5  
STK32A  
AQPEP  
SLC36A1  
EIF4E1B  
RASGEF1C  
ANKRD31  
SERINC5  
LOC257358  
LOC257396  
EFCAB9  
SH3PXD2B

TMEM52  
SLC36A3  
LUST  
B3GALT4  
CHRA1  
LOC339505  
KIF4B  
SNX3  
SNTG1  
AADACL4  
RGMB  
RNGTT  
GDAP1  
PRAMEF5  
RFESD  
CD164  
EXOSC4  
HNRNPCL1  
CHSY3  
SYNGAP1  
PDP1  
PRAMEF9  
TMEM173  
WISP3  
CNGB3  
PRAMEF10  
FAM170A  
STK19  
LY6K  
FAM131C  
LOC340073  
IER3  
KCTD9  
PADI6  
LOC340074  
SYNJ2  
ESRP1  
C1orf187  
ARSI  
VNN2  
WHSC1L1  
SPATA21  
IRGM  
VNN1  
IMPAD1  
AGRN  
FAM174A

LOC285593  
FAM153A  
ARL10  
KIAA0825  
GPR150  
DTWD2  
RELL2  
NBPF22P  
LOC285626  
LOC285627  
LOC285629  
SLC36A3  
KIF4B  
OR2V2  
C5orf64  
RNF180  
SREK1IP1  
ZNF454  
C5orf60  
RGMB  
RFESD  
CHSY3  
LOC340037  
TMEM173  
FAM170A  
LOC340073  
LOC340074  
ARSI  
ANKRD34B  
PFN3  
ZNF879  
IRGM  
FBLL1  
IDAS  
ACTBL2  
FAM174A  
MTX3  
CATSPER3  
NIPAL4  
HCN1  
SLCO4C1  
TICAM2  
DND1  
MAST4  
C5orf25  
RNF138P1  
FLJ38109

PRPF4B  
TMEM70  
APITD1  
CATSPER3  
WASF1  
PINX1  
CATSPER4  
NIPAL4  
HIST1H3F  
TRMT12  
GPR153  
SLCO4C1  
HIST1H2AG  
OXR1  
FAM132A  
TICAM2  
HIST1H2BJ  
WDYHV1  
HES5  
DND1  
RNF8  
PIWIL2  
LOC388588  
FLJ38109  
TAAR5  
ELP3  
RNF207  
C5orf48  
MAP7  
THAP1  
TMEM82  
LOC389332  
TBX18  
ARMC1  
TRNP1  
C5orf65  
LATS1  
INTS10  
CD164L2  
C5orf46  
GCM2  
CCDC25  
HES3  
ARHGEF37  
WDR46  
UBE2W  
PRAMEF12

C5orf48  
LOC389332  
C5orf65  
C5orf46  
ARHGEF37  
RGS7BP  
C5orf63  
SPINK6  
ANKHD1-EI  
MIR103A1  
MIR143  
MIR145  
MIR146A  
MIR218-2  
MIR9-2  
SPINK14  
FNDC9  
CRSP8P  
FLJ42709  
C5orf56  
FLJ16171  
MIR340  
IGIP  
GPX8  
TIFAB  
FLJ35946  
LOC553103  
MIR449A  
CTXN3  
SNORD95  
SNORD96A  
ECSCR  
LOC642366  
TMEM232  
C5orf43  
LOC643201  
GRXCR2  
SPINK9  
ZFP62  
LOC644100  
FLJ33630  
LOC644936  
CCNI2  
LINC00461  
CBY3  
LOC647859  
GUSBP3

C5orf63  
ZBTB22  
BRF2  
PRAMEF21  
SPINK6  
TAAR2  
AGPAT5  
PRAMEF8  
ANKHD1-EIF4EBP3  
TAAR3  
LAPTM4B  
PRAMEF18  
MIR143  
CD83  
C8orf39  
PRAMEF17  
MIR145  
HMGN3  
TMEM55A  
PLA2G2C  
SPINK14  
PPT2  
SLC39A4  
TMEM200B  
FNDC9  
CDYL  
CHD7  
PRAMEF4  
C5orf56  
NCR2  
SYBU  
PRAMEF13  
IGIP  
MED23  
INTS8  
SH2D5  
TIFAB  
QKI  
INTS9  
C1orf130  
FLJ35946  
LY86  
CSGALNACT1  
RNF223  
LOC553103  
FHL5  
HR

GTF2H2B  
FAM153C  
SNORA13  
SCARNA18  
SNORA47  
SNORA74B  
MIR449B  
MIR581  
MIR583  
MIR585  
SNHG4  
MIR143HG  
GTF2H2C  
LOC728342  
SERF1B  
LOC728554  
LOC728723  
LOC729080  
AACSP1  
LOC729678  
OR4F29  
GTF2H2D  
GUSBP9  
VTRNA2-1  
MIR874  
LOC100129  
LRRC70  
LOC100131  
FAM196B  
LOC100132  
LOC100132  
FAM159B  
LOC100133  
LOC100133  
LOC100170  
C5orf52  
LOC100268  
LOC100272  
LOC100289  
LOC100289  
MIR1289-2  
MIR1229  
MIR103B1  
MIR1244-1  
TMED7-TIC  
NCRUPAR  
LOC100303

PRAMEF3  
CTXN3  
AKAP7  
PAG1  
LDLRAD2  
ECSCR  
ATG5  
PBK  
MIR200A  
TMEM232  
MED20  
ZNF395  
MIR200B  
GRXCR2  
SLC25A27  
DEFB103B  
MIR34A  
SPINK9  
TBPL1  
BIN3  
FLJ42875  
LOC644100  
EEF1E1  
TEX15  
PRAMEF11  
FLJ33630  
BAG2  
GSDMC  
PRAMEF6  
CCNI2  
POLR1C  
C8orf44  
LOC440563  
SNORA13  
MAD2L1BP  
JPH1  
UQCRHL  
MIR583  
WTAP  
C8orf4  
MINOS1  
SNHG4  
AKAP12  
ENY2  
ANKRD65  
MIR143HG  
MDC1

MIR2277  
MIR449C  
MIR1244-3  
MIR1244-2  
MIR4280  
MIR3142  
MIR3141  
MIR4281  
MTRNR2L2  
MIR3607  
MIR3655  
MIR3660  
MIR3912  
MIR3936  
MIR3661  
LOC100505  
LOC100505  
LOC100505  
LOC100505  
OCLN  
LOC100507  
MIR4804  
MIR4633  
MIR4634  
MIR4461  
MIR3977  
MIR4460  
MIR4638  
MIR4803  
MIR378E  
LOC100859

CPA6  
PRAMEF7  
LOC728342  
TRAM2  
SLURP1  
MIR429  
LOC729080  
KIAA0408  
SLC45A4  
FAM138F  
VTRNA2-1  
PHACTR2  
MTUS1  
LOC643837  
MIR874  
FAM65B  
KIAA1456  
TMEM88B  
LOC100133050  
ZSCAN12  
ZFAT  
C1orf233  
C5orf52  
BCLAF1  
KIAA1967  
LOC644961  
LOC100289230  
CUL7  
ZNF250  
C1orf200  
LOC100289673  
ZBTB24  
PLEKHA2  
PRAMEF19  
MIR1289-2  
KIAA0319  
SH2D4A  
PRAMEF20  
MIR1244-1  
SNAP91  
PRDM14  
FAM138A  
TMED7-TICAM2  
FIG4  
SNX16  
LOC646471  
MIR1244-3

NUP153  
NECAB1  
LOC649330  
MIR1244-2  
CASP8AP2  
PDLIM2  
LOC653566  
MIR3141  
RANBP9  
SOX17  
PRAMEF22  
MIR3655  
SLC17A4  
CSMD1  
PRAMEF15  
MIR3936  
UST  
EBF2  
WASH7P  
MIR3661  
TRIM10  
FAM160B2  
PRAMEF16  
LOC100505658  
FLOT1  
DEPTOR  
SCARNA1  
LOC100505678  
RCAN2  
PYCRL  
SNORA44  
LOC100505841  
SLC17A2  
C8orf33  
SNORA61  
MIR4633  
HCG9  
ZBTB10  
SNORA59B  
MIR4461  
PRSS16  
LYNX1  
SNORA59A  
MIR4460  
CRISP3  
MTMR9  
SNORA16A

TRDN  
DUSP26  
SNORD85  
CITED2  
C8orf51  
SNORD99  
BTN3A3  
DSCC1  
SNORD103A  
BTN2A2  
DERL1  
SNORD103B  
ECI2  
CHCHD7  
MIR551A  
PFDN6  
GPR172A  
CDK11A  
HMGN4  
HMBOX1  
SLC35E2B  
TRIM38  
EFCAB1  
LOC728716  
CAP2  
MCPH1  
LOC729059  
SYNCRIP  
PPP1R3B  
PRAMEF14  
UBD  
PLEKHF2  
FLJ37453  
AGPAT1  
ZMAT4  
LOC729737  
SLC35A1  
ZFAND1  
OR4F29  
SCGN  
ZFHX4  
LOC100129196  
C6orf108  
GSDMD  
LOC100129534  
C6orf10  
NIPAL2

LOC100130417  
FARS2  
RNF122  
LOC100132062  
FUT9  
CSPP1  
LOC100132287  
CNPY3  
BAALC  
LOC100133331  
TRAF3IP2  
NUDT18  
LOC100133445  
HBS1L  
ZNF696  
LOC100133612  
SLC17A3  
GRHL2  
DDX11L1  
RPP40  
DOCK5  
TTC34  
FRS3  
FLJ14107  
LOC100288069  
PDE10A  
VCPIP1  
MIR1976  
SLC22A7  
ZNF703  
NPPA-AS1  
HCP5  
TTI2  
MIR3115  
EHMT2  
RAB11FIP1  
MIR4253  
SMPDL3A  
PREX2  
MIR4251  
APOBEC2  
REEP4  
MIR4252  
PNRC1  
ARHGAP39  
MIR3917  
ASCC3

ZNF34  
MIR3675  
RAB32  
SLC25A32  
ENO1-AS1  
TRIM31  
TM7SF4  
LOC100506730  
KATNA1  
STMN4  
LOC100506801  
FGFR1OP  
RNF170  
LOC100506963  
BTN3A2  
SLCO5A1  
APITD1-CORT  
BTN3A1  
SHARPIN  
C1orf151-NBL1  
BTN2A1  
EPPK1  
MIR4695  
CAPN11  
SCRT1  
MIR4420  
BVES  
SOX7  
MIR4684  
NUDT3  
FAM167A  
MIR4689  
SEC63  
SLC35G5  
MIR4632  
NRM  
LINC00208  
MIR4417  
STK38  
C8orf12  
MIR378F  
SCAF8  
CRISPLD1  
RCAN3AS  
KIAA1009  
TRAPPC9  
ICK

TM2D2  
ENPP4  
TATDN1  
ANKRD6  
NACAP1  
RIMS1  
NCALD  
DOPEY1  
SGK196  
ZNF292  
MAF1  
FTSJD2  
UTP23  
CDK19  
GINS4  
CUL9  
HOOK3  
TAB2  
PPAPDC1B  
MDN1  
MAK16  
TSPYL4  
TRIM55  
ANKS1A  
FUT10  
UBR2  
PARP10  
SASH1  
C8orf76  
SYNE1  
TIGD5  
UFL1  
NUDCD1  
SIRT5  
FAM83A  
PHF3  
PPP1R16A  
HEY2  
FAM86B1  
DAAM2  
LRRCC1  
KIAA0240  
TSPYL5  
DDAH2  
DNAJC5B  
HEBP2  
PSKH2

ORC3  
FAM110B  
CD2AP  
MED30  
BRD7P3  
ERI1  
MTCH1  
ZNF251  
ZNF318  
KIFC2  
SPDEF  
TMEM67  
MTO1  
LONRF1  
ASF1A  
CHMP7  
YIPF3  
MTDH  
USP49  
CHMP4C  
CCDC28A  
PKHD1L1  
MTHFD1L  
NAPRT1  
PNISR  
WDR67  
IBTK  
HPYR1  
MOXD1  
RP1L1  
IPCEF1  
TP53INP1  
ZNF451  
TGS1  
SENP6  
MFSD3  
OR2B6  
MAL2  
TIAM2  
XKR4  
FBXL4  
CSMD3  
C6orf123  
RHPN1  
FAM50B  
FBXO32  
FBXO9

C8orf40  
FBXO5  
SLC26A7  
SLC17A5  
PCMTD1  
OR12D2  
CTHRC1  
OR11A1  
OSR2  
RGS17  
C8orf34  
OR2W1  
TOP1MT  
OR2J2  
CLDN23  
OR2H1  
ZNF572  
SNORD52  
GOT1L1  
SNORD50A  
FAM92A1  
SNORD48  
VPS37A  
PDE7B  
C8orf38  
FILIP1  
TMEM68  
BRPF3  
ABRA  
GNMT  
LYPD2  
TNFRSF21  
NKX2-6  
SESN1  
TMEM71  
TINAG  
SGCZ  
DLL1  
ADHFE1  
OSTM1  
UBXN2B  
MRPS18B  
PXDNL  
TMEM14A  
AGPAT6  
MRPL18  
UNC5D

NDUFAF4  
LETM2  
C6orf15  
DCAF4L2  
MYLIP  
RALYL  
ABT1  
HGSNAT  
DSE  
DEFB104A  
PRICKLE4  
LOC157273  
PACSIN1  
SGK223  
ZNRD1  
PEBP4  
CLDN20  
CDCA2  
NOX3  
TMEM65  
DEF6  
LOC157381  
C6orf48  
RDH10  
SLC35B3  
C8orf56  
HDDC2  
ANKRD46  
GMNN  
ESCO2  
MRPL2  
FBXO16  
TFB1M  
LOC157627  
CYB5R4  
FAM84B  
TUBE1  
C8orf37  
C6orf203  
VPS13B  
TBC1D7  
C8orf42  
NRN1  
ERICH1  
CYP39A1  
SLC7A13  
CDC40

TDH  
RWDD1  
TMEM74  
AIG1  
FAM91A1  
NOL7  
C8orf48  
SNX9  
C8orf45  
FAM8A1  
CLVS1  
UBE2J1  
NKX6-3  
DCDC2  
KCNU1  
ETV7  
C8orf84  
TMEM14C  
CNBD1  
VTA1  
SLC30A8  
LGSN  
COL22A1  
TDP2  
SNX31  
CUTA  
TMEM64  
PPIL1  
ZNF596  
BRP44L  
IDO2  
HECA  
DEFT1P  
RAB23  
SDR16C5  
COQ3  
ADCK5  
CLIC5  
TSNARE1  
IL20RA  
R3HCC1  
TREM2  
PRSS55  
TREM1  
C8orf74  
UNC93A  
HTRA4

HCG4  
ADAM32  
GFOD1  
C8orf47  
HMGCLL1  
LGI3  
MTRF1L  
MAPK15  
CCHCR1  
DEFB105A  
GTPBP2  
DEFB106A  
BTN2A3P  
DEFB107A  
AHI1  
DEFB109P1  
UHRF1BP1  
DEFB130  
ELOVL2  
ATP6V0D2  
CDKAL1  
NEIL2  
PAK1IP1  
YTHDF3  
RMND1  
C8orf46  
PHIP  
LOC254896  
SOBP  
REXO1L1  
AKIRIN2  
ADAM5P  
CENPQ  
FLJ10661  
MRPS18A  
XKR6  
MRPS10  
NSMCE2  
LRRC1  
LOC286059  
PHF10  
ZNF707  
QRSL1  
BREA2  
VNN3  
FAM83H  
TMEM63B

LOC286083  
AKIRIN2-AS1  
LOC286094  
DDX43  
EFHA2  
FAM46A  
ZNF252  
LRRC16A  
TMED10P1  
TBC1D22B  
C8orf77  
TMEM30A  
LOC286114  
SAYSD1  
C8orf31  
C6orf70  
ZFP41  
LMBRD1  
SCARA5  
TRERF1  
LOC286135  
ACOT13  
RNF5P1  
ECHDC1  
C8orf83  
APOM  
DPY19L4  
BTNL2  
FBXO43  
KCNQ5  
LOC286177  
TRIM39  
NKAIN3  
AGPAT4  
LOC286184  
TULP4  
LOC286186  
RARS2  
PPP1R42  
HYMAI  
LOC286189  
PDSS2  
LOC286190  
GOPC  
GPIHBP1  
LYRM4  
LOC340357

C6orf162  
KLHL38  
VAR2  
NRBP2  
GPR126  
ZNF517  
KIAA1244  
KIAA1875  
NHSL1  
C8ORFK29  
LYRM2  
RSPO2  
SNX14  
POTEA  
MRS2  
SLC10A5  
PLEKHG1  
LOC349196  
ARID1B  
SPATC1  
LRFN2  
USP17L2  
AARS2  
CA13  
XPO5  
XKR5  
SERINC1  
FAM90A25P  
HACE1  
LOC389641  
FAM135A  
C8orf80  
TMEM181  
C8orf86  
ZBTB2  
FAM150A  
BEND3  
XKR9  
KIAA1586  
LOC389676  
CPNE5  
RBM12B  
LSM2  
FLJ43860  
C6orf47  
MAFA  
LY6G5B

LOC392196  
C6orf115  
LOC392232  
RRAGD  
GDF6  
LY6G6D  
LOC401463  
ENPP5  
C8orf59  
PRDM13  
SAMD12  
PBOV1  
MIR124-1  
BACH2  
MIR124-2  
ELOVL5  
MIR30B  
TRMT11  
MIR30D  
SMAP1  
MIR320A  
ZFAND3  
DEFB103A  
SLC22A23  
C8orf82  
C6orf164  
FER1L6-AS1  
MUTED  
OR4F21  
CCDC90A  
FAM90A13  
GPSM3  
FAM90A5  
FKBPL  
FAM90A7  
KIF13A  
FAM90A8  
PERP  
FAM90A18  
SMOC2  
FAM90A9  
POPDC3  
FAM90A10  
ZNF323  
FLJ39080  
ALDH8A1  
FLJ46284

C6orf106  
FLJ42969  
MICAL1  
C8orf85  
MRPL14  
LRRC24  
DLK2  
DEFA10P  
LY6G6E  
C8orf22  
ULBP3  
MIR383  
OR2A4  
LINC00293  
C6orf211  
DEFB107B  
OGFRL1  
DEFB104B  
FAM184A  
DEFB106B  
ZDHHC14  
DEFB105B  
ZNF322  
C8orf58  
MANEA  
LINC00251  
ADGB  
SAMD12-AS1  
TREML2  
ZFAT-AS1  
RPP21  
HAS2-AS1  
LINC00472  
DEFB135  
ATAT1  
DEFB136  
FRMD1  
DEFB134  
AGPAT4-IT1  
ZNF704  
C6orf208  
C8orf69  
C6orf97  
C8orf75  
MYCT1  
MBOAT4  
ZKSCAN3

LINC00051  
ULBP2  
MIR486  
ULBP1  
DEFB109P1B  
ZSCAN16  
SNHG6  
LPAL2  
SNORD87  
RNF39  
C8orf73  
SLC44A4  
SCXB  
VWA7  
LINC00535  
C6orf25  
UG0898H09  
LY6G6C  
RPL23AP53  
LY6G5C  
RAD21-AS1  
PRR3  
FAM90A14  
KHDC1  
FABP9  
ZNRD1-AS1  
FABP12  
PRRT1  
FAM86B2  
EGFL8  
SPAG11A  
HCG4B  
FER1L6  
GPR63  
MIR596  
TXNDC5  
MIR597  
COL21A1  
MIR598  
C6orf62  
MIR599  
OR5V1  
MIR661  
OR2B2  
LOC727677  
PPP1R14C  
HEATR7A

OR12D3  
LOC728024  
SPACA1  
DEFA1B  
RNF146  
FAM90A20  
TMEM14B  
LOC728724  
SF3B5  
FAM90A19  
TAAR8  
ZNF705D  
SH3BGRL2  
OC90  
RIOK1  
LOC731779  
TFAP2D  
MIR875  
KCNK16  
MIR937  
RSPH3  
MIR939  
TTLL2  
LOC100127983  
DTNBP1  
LOC100128126  
ARMC2  
LOC100128338  
FBXO30  
LOC100128750  
RPF2  
FAM66B  
MNF1  
LOC100128993  
L3MBTL3  
TCF24  
FAM120B  
SCXA  
MCHR2  
LOC100130155  
PGBD1  
LOC100130231  
FAXC  
CCDC166  
FNDC1  
LOC100130298  
TTBK1

LOC100130301  
GJA10  
LRRC69  
RTN4IP1  
LOC100130964  
ADTRP  
LOC100131726  
RSPO3  
ZNF705G  
LRP11  
FAM66E  
LTV1  
LOC100132396  
SERAC1  
LOC100132891  
USP45  
FAM66D  
REPS1  
FAM66A  
HIST1H2AH  
SBF1P1  
HIST1H2BK  
LOC100133267  
PPIL4  
LOC100133669  
PAQR8  
LOC100192378  
SLC22A16  
LOC100287015  
RRP36  
DEFT1P2  
C6orf7  
LOC100287846  
KCNK17  
LOC100288181  
ABCC10  
REXO1L2P  
TRIM15  
LOC100288748  
KLC4  
DEFB4B  
UBE2CBP  
MIR1205  
MLIP  
MIR1322  
LINC00473  
MIR1206

KIAA1919  
MIR1207  
TJAP1  
MIR1204  
ARHGAP18  
MIR548I3  
POM121L2  
MIR1234  
SYTL3  
MIR2053  
GTF3C6  
MIR2052  
MRAP2  
MIR1208  
RWDD2A  
MIR4287  
IL17F  
MIR3148  
FAM54A  
MIR4288  
SFT2D1  
MIR3150A  
EFHC1  
MIR3151  
BTBD9  
LOC100499183  
KLHL32  
LOC100500773  
TMEM200A  
MIR3926-2  
SCAND3  
MIR3622A  
MB21D1  
MIR3926-1  
FOXP4  
MIR3622B  
KLHDC3  
MIR3150B  
NUS1  
MIR3610  
C6orf72  
LOC100505659  
SLC26A8  
LOC100505676  
IL22RA2  
LOC100505718  
MAS1L

LOC100506990  
C6orf192  
LOC100507117  
SLC16A10  
LOC100507156  
IP6K3  
LOC100507341  
TAGAP  
LOC100507632  
TAF8  
LOC100507651  
ADAT2  
C8orf44-SGK3  
RIPPLY2  
ZHX1-C8ORF76  
IRAK1BP1  
MIR4469  
CLVS2  
MIR378D2  
TAAR9  
MIR548O2  
TAAR1  
MIR4661  
STXBP5  
MIR4663  
NCOA7  
MIR4472-1  
HINT3  
MIR4664  
PACRG  
MIR4659A  
B3GAT2  
MIR4660  
C6orf57  
MIR4659B  
CD109  
MIR4471  
RAET1E  
MIR4470  
PM20D2  
LOC100616530  
SRSF12  
LOC100652791  
C6orf141  
PCAT1  
TRIM40  
LINC00536

DPCR1  
FSBP  
NRSN1  
LOC153910  
ZC2HC1B  
SNRNP48  
CNKSR3  
RAET1L  
SAMD3  
MGC34034  
SLC2A12  
LOC154092  
MBOAT1  
HDGFL1  
PNLDC1  
RNF217  
NKAIN2  
C6orf221  
C6orf165  
BVES-AS1  
LOC154449  
CCDC167  
PRSS35  
LCA5  
OLIG3  
TXLNB  
DACT2  
C6orf118  
PSORS1C1  
PSORS1C2  
PPP1R18  
PTCRA  
OSTCP1  
TCTE1  
KHDRBS2  
TRIM39-RPP21  
TUBB  
C6orf163  
PIP5K1P1  
CCDC162P  
AKD1  
NT5DC1  
FAM26D  
ZUFSP  
FAM162B  
C6orf170  
BEND6

GSTA5  
OPN5  
GPR115  
GPR116  
TDRD6  
SPATS1  
C6orf223  
RSPH9  
LRRC73  
TREML2P1  
LOC221442  
C6orf130  
KIF6  
TMEM217  
FGD2  
PI16  
C6orf89  
ARMC12  
C6orf1  
LEMD2  
ZBTB9  
ZBTB12  
C6orf136  
ZSCAN12P1  
HIST1H2AA  
KDM1B  
RBM24  
RNF182  
PHACTR1  
C6orf228  
SYCP2L  
LINC00518  
PXDC1  
HS3ST5  
GPRC6A  
RFX6  
SLC35F1  
FAM83B  
GPR111  
TSPO2  
UNC5CL  
KCTD20  
PXT1  
LHFPL5  
SCUBE3  
ZSCAN23  
NKAPL

TOB2P1  
FAM217A  
VGLL2  
DEFB110  
DEFB112  
DEFB113  
DEFB114  
LACE1  
HCG27  
C6orf191  
MMS22L  
WDR27  
FAM26E  
MCM9  
RNF144B  
HIST1H2BA  
SCML4  
GPX6  
SHPRH  
NCR3  
LY6G6F  
MDGA1  
GPR110  
ZNF311  
LINC00326  
LOC285740  
CEP57L1  
PPIL6  
LOC285758  
FLJ34503  
DCBLD1  
LOC285762  
LY86-AS1  
CAGE1  
LOC285796  
PRR18  
LOC285819  
HLA-F-AS1  
HCG22  
LOC285847  
PNPLA1  
TREML4  
RPL7L1  
RNF5P1  
TAAR6  
SLC35D3  
ZC3H12D

DPPA5  
IFITM4P  
CLPSL1  
TREML1  
TREML3  
RSPH4A  
ECT2L  
EYS  
ZNF391  
ZFP57  
TUBB2B  
SLC35B2  
C6orf52  
NUP43  
HCG26  
C6orf58  
RAET1G  
KAAG1  
GUSBP4  
GJB7  
NHLRC1  
ZKSCAN4  
GUSBP2  
HMGA1P7  
SNHG5  
SUMO4  
C6orf147  
CENPW  
C6orf174  
LINC00222  
CEP85L  
C6orf120  
VN1R10P  
HIST1H2APS1  
THEMIS  
PSMG4  
SFTA2  
CLPSL2  
C6orf222  
GLYATL3  
GFRAL  
LIN28B  
SAMD5  
IYD  
MUC21  
FLJ23152  
LINC00340

LOC401242  
MCCD1  
SAPCD1  
LINC00336  
FLJ41649  
CRIP3  
KLHL31  
DKFZp451B082  
TCP10L2  
LINC00242  
DEFB133  
C6orf201  
GTF2H5  
ERVFRD-1  
MIR206  
MIR219-1  
MIR30A  
MIR30C2  
HCG23  
HCG25  
HCG18  
C6orf226  
TMEM151B  
OOEP  
FAM26F  
FLJ46906  
LOC441177  
OR2B3  
OR2J3  
OR14J1  
OR10C1  
ATP6V0CP3  
PTCHD4  
MCART3P  
GSTM2P1  
RFPL4B  
MIR133B  
GGNBP1  
HCG11  
LOC554223  
SNORD101  
SNORD100  
SNORA33  
C6orf225  
TSG1  
LOC643623  
TRAF3IP2-AS1

CTAGE9  
LOC645434  
RAET1K  
C6orf132  
RPS16P5  
PPP1R3G  
MLLT4-AS1  
SNORA20  
SNORA29  
SNORA38  
SNORD50B  
SNORD32B  
SNORD84  
SNORD117  
MIR548A1  
MIR548B  
MIR586  
LOC728012  
TPI1P3  
C6orf186  
HULC  
LOC729176  
LOC729177  
LOC729178  
TMEM242  
LOC729603  
LOC730101  
GSTA7P  
TDRG1  
TMEM170B  
SCARNA27  
MIR877  
HGC6.3  
LOC100128176  
BET3L  
KHDC1L  
LOC100129518  
LOC100129636  
LOC100130275  
LOC100130357  
PSORS1C3  
LOC100130890  
C6orf99  
LOC100131047  
LOC100131289  
LINC00271  
LOC100132354

LOC100132735  
LINC00240  
TOMM6  
LOC100270746  
LOC100287632  
LOC100287718  
LOC100288198  
LOC100289495  
LOC100293534  
LOC100294145  
NHEG1  
MIR1275  
MIR1913  
MIR2113  
MIR1236  
MIR548H3  
LOC100422737  
MIR3143  
MIR3145  
MIR4282  
MIR3918  
MIR3939  
MIR3668  
MIR3662  
MIR3925  
MIR3692  
MIR3691  
LOC100506207  
LOC100506409  
LOC100506804  
LOC100507173  
LOC100507194  
LOC100507203  
LOC100507254  
LOC100507362  
MICA  
LOC100507462  
LOC100507463  
LOC100507489  
LOC100507547  
LOC100507557  
LOC100507584  
MUC22  
CAHM  
MUTED-TXNDC5  
EEF1E1-MUTED  
RPS10-NUDT3

MSH5-SAPCD1  
ATP6V1G2-DDX39B  
PPT2-EGFL8  
MIR4464  
MIR4647  
MIR4466  
MIR4643  
MIR4641  
MIR4465  
MIR4646  
MIR4640  
MIR4639  
MIR4642  
MIR4462  
MIR4644  
LOC100652739

| PG   | SARC      |     |             |            | SKCM       |                 |           |            |
|------|-----------|-----|-------------|------------|------------|-----------------|-----------|------------|
|      | Subtype B |     | Subtype A   |            | Subtype B  |                 | Subtype A |            |
|      | Amp       | Del | Amp         | Del        | Amp        | Del             | Amp       | Del        |
|      |           |     | CPM         | CDKN2A     | CPM        | RB1             | NOTCH2    | CDKN2A     |
|      |           |     | hsa-mir-191 | MGC45800   | PRRC2C     | hsa-mir-31      | GAB2      | PTEN       |
| 01   |           |     | hsa-mir-42  | hsa-mir-19 | VGLL3      | CDKN2A          | ADAM30    | APLP2      |
|      |           |     | GPI         | hsa-mir-12 | JUN        | ATP1B2          | REG4      | MGC45800   |
| 1a   |           |     | hsa-mir-65  | EPHA3      | UST        | ZMYND11         | NBPF7     | RPL22      |
|      |           |     | hsa-mir-12  | hsa-mir-54 | CCNE1      | hsa-mir-1305    |           | hsa-mir-42 |
| 99   |           |     | MDM2        | CDKN2B     | ATP4B      | FBXO25          |           | hsa-mir-14 |
| 05   |           |     | FASLG       | LINC00290  | hsa-mir-11 | hsa-mir-551a    | STX2      | CDK4       |
|      |           |     | NDUFS6      | EVI2A      | DNAH5      | ZNF135          | GPR31     | hsa-mir-12 |
|      |           |     | UBA2        | hsa-mir-54 | BIRC2      | hsa-mir-1302-11 |           | hsa-mir-63 |
|      |           |     | BCR         | HTR1F      | SPRR1B     | IGSF9B          |           | hsa-mir-21 |
| 0    |           |     | hsa-mir-12  | hsa-mir-12 | EMR1       | hsa-mir-595     |           | hsa-mir-12 |
|      |           |     | PIGC        | MTAP       | CAPG       | HRAS            |           | hsa-mir-34 |
| 8    |           |     | SLC6A3      | EVI2B      | hsa-mir-13 | EVI2A           |           | C10orf91   |
| 24   |           |     | PDCD2L      | hsa-mir-54 | [KCNJ2]    | RPL29P2         |           | hsa-mir-62 |
| 80   |           |     | GNAZ        | POU1F1     | FGFR1      | FOXK2           |           | hsa-mir-18 |
| 17   |           |     | hsa-mir-12  | hsa-let-7c | TFEC       | hsa-mir-602     |           | hsa-mir-15 |
|      |           |     | DNM3        | C9orf53    | USP25      | PTEN            |           | hsa-mir-34 |
|      |           |     | IRX4        | NF1        | GNB2L1     | ACP1            |           | hsa-mir-19 |
| 51   |           |     | VPREB1      | hsa-mir-19 | BYSL       | OR2G3           |           | hsa-mir-31 |
|      |           |     | hsa-mir-12  | PROS1      | hsa-mir-10 | CYP2E1          |           | hsa-mir-15 |
| 2e   |           |     | C1orf9      | hsa-mir-31 | hsa-mir-31 | NFATC1          |           | hsa-mir-19 |
| 76   |           |     | MRPL36      | CDKN2B-A   | MDM2       | COL12A1         |           | hsa-mir-10 |
|      |           |     | TOP3B       | OMG        | MYSM1      | COL6A2          |           | hsa-mir-43 |
|      |           |     | hsa-mir-54  | hsa-mir-56 | LOC100128  | hsa-mir-1302-9  |           | C9orf53    |
| 29   |           |     | C1orf105    | CGGBP1     | F7         | hsa-mir-4269    |           | KLLN       |
|      |           |     | LPCAT1      | hsa-mir-31 | hsa-mir-33 | IRF4            |           | NFRKB      |
| 8-2  |           |     | RAB36       | RAB11FIP4  | TRIO       | hsa-mir-3201    |           | LINC00290  |
| 23   |           |     | ANXA13      | hsa-mir-56 | BIRC3      | ZNF423          |           | KCNAB2     |
| 8i-1 |           |     | MIR199A2    | CHMP2B     | SPRR2A     | CASP1           |           | NDUFS6     |
| 09   |           |     | SDHAP3      | BAGE       | INSR       | hsa-mir-135a-1  |           | GPC1       |
|      |           |     | PPM1F       | MIR193A    | CD8A       | hsa-mir-4277    |           | RAN        |
| ;    |           |     | HAS2        | AADAC      | hsa-mir-14 | CDKN2C          |           | KIF25      |
| 9    |           |     | MIR214      | ZNF654     | STAR       | ALG10           |           | hsa-mir-43 |
| 3    |           |     | LOC728613   | CXADR      | MDFIC      | ZFP36L1         |           | hsa-mir-42 |
| 8t   |           |     | PRAME       | MIR4724    | BTNL3      | hsa-mir-570     |           | hsa-mir-12 |
|      |           |     | MYC         | ACPP       | CCND3      | hsa-mir-613     |           | hsa-mir-12 |
| 81   |           |     | MIR3120     | ARL13B     | MLANA      | hsa-mir-340     |           | PWWP2B     |
| 81   |           |     | MIR4277     | TMPRSS15   | hsa-mir-62 | hsa-mir-647     |           | ITPKA      |
| 37   |           |     | POM121L1    | MIR4733    | LOC100131  | hsa-mir-569     |           | hsa-mir-43 |
| 4b   |           |     | NDUFB9      | ADCY5      | F10        | COL4A1          |           | hsa-mir-31 |
| 2    |           |     | DNM3OS      | DHFRL1     | ALDH3A1    | hsa-mir-1268    |           | hsa-mir-12 |
|      |           |     | FBXW4P1     | HSPA13     | MMP7       | hsa-mir-1234    |           | hsa-mir-31 |

|        |            |            |            |                |            |             |
|--------|------------|------------|------------|----------------|------------|-------------|
| 02-2   | POU5F1B    | ADPRH      | SPRR2B     | ADCYAP1        | hsa-mir-31 | L3MBTL2     |
| 5      | RTDR1      | CADM2      | ZNF557     | GOLGA3         | hsa-mir-11 | ADAM30      |
| 79     | PVT1       | TPTE       | CD8B       | LPAR6          | hsa-mir-12 | TFB2M       |
|        | GGTLC2     | AGTR1      | ALDH1A3    | BOK            | hsa-mir-13 | METTL1      |
| 71     | SQLE       | C3orf38    | TACC1      | CDKN2B         | hsa-mir-32 | hsa-mir-66  |
|        | LOC96610   | NRIP1      | FOXP2      | TP53           | ST14       | F13A1       |
| 82     | MTSS1      | ALCAM      | OR4F3      | TUBB8          | CHD5       | EYS         |
| 8      | ZNF280A    | VGLL3      | GUCA1A     | SLC25A4        | SLC6A3     | hsa-mir-31  |
| 5-2    | KIAA0196   | BTG3       | GLDC       | C8orf42        | CAPN10     | ACTB        |
|        | ZNF280B    | ATP1B3     | hsa-mir-31 | hsa-mir-4251   | PIWIL1     | hsa-mir-43  |
|        | TRIB1      | STX19      | GAS6       | ZSCAN18        | MLLT4      | MRPS33      |
| 98     | ZDHHC8P1   | USP25      | ALDH3A2    | PPAP2C         | hsa-mir-19 | ETFA        |
| 40     | RNF139     | ATP6V1A    | MMP20      | LOC283174      | hsa-mir-30 | hsa-mir-92  |
|        | LOC648691  | LOC440970  | SPRR2D     | hsa-mir-153-2  | hsa-mir-21 | EZH2        |
| 5      | ZHX1       | RBM11      | MBD3L2     | PSMD13         | CANX       | RCAN3       |
|        | CES5AP1    | ATR        | DNAH6      | EVI2B          | LTK        | CD72        |
|        | ZHX2       | MIR4795    | IGF1R      | DNAH2          | hsa-mir-13 | JAK2        |
| 8      | MIR650     | CHODL-AS1  | ASH2L      | ABCA2          | hsa-mir-62 | CHADL       |
|        | ATAD2      | FOXL2      | MIR3666    | KLLN           | hsa-mir-42 | PHGDH       |
|        | IGLL5      | C21orf15   | BTNL8      | SH3YL1         | AFG3L1P    | SMYD3       |
| 0      | TRMT12     | CASR       | GUCA1B     | OR2G2          | hsa-mir-31 | TSPAN31     |
|        | WDYHV1     | C21orf91   | INSL4      | ECHS1          | hsa-mir-32 | hsa-mir-93  |
|        | GSDMC      | CBLB       | hsa-mir-43 | CTDP1          | hsa-mir-12 | GCNT2       |
| 8-2    | DERL1      | SAMSN1     | LAMP1      | COX7A2         | DMRT1      | hsa-mir-31  |
|        | TATDN1     | CD80       | DRG2       | FTCD           | hsa-mir-49 | GNA12       |
|        | C8orf76    | BAGE5      | YAP1       | DMRT1          | BARX2      | hsa-mir-63  |
| 7      | FAM83A     | CD86       | SPRR2E     | NDUFA10        | RNF207     | ADCK2       |
|        | WDR67      | BAGE4      | MBD3L5     | EXOC2          | IRX4       | PTPN9       |
|        | FBXO32     | CD47       | GGCX       | ACR            | ANKMY1     | hsa-mir-42  |
|        | ZNF572     | BAGE3      | MEF2A      | C16orf78       | FZD10      | ZNF212      |
|        | TMEM65     | CP         | BAG4       | CASP4          | TCP10      | CLIC4       |
|        | LOC157381  | BAGE2      | OR4F16     | hsa-mir-566    | hsa-mir-31 | CLTA        |
| 3-1-as | FAM84B     | CPA3       | PGC        | NDUFS6         | hsa-mir-30 | RLN1        |
|        | FAM91A1    | CHODL      | JAK2       | FAF1           | ACTC1      | REG4        |
|        | NSMCE2     | CPB1       | ARHGAP5    | ALG10B         | FLT4       | LOC149134   |
| 73     | KLHL38     | ANKRD30B   | GRK1       | RAD51B         | TYRO3      | TSFM        |
|        | FER1L6-AS1 | CSTA       | FOXO3B     | APOD           | hsa-mir-12 | hsa-mir-13  |
|        | HAS2-AS1   | LIPI       | KIAA1377   | CDKN1B         | hsa-mir-43 | HIVEP1      |
|        | FER1L6     | DRD3       | SPRR2F     | hsa-mir-1229   | hsa-mir-12 | hsa-mir-9-3 |
|        | LOC727677  | ABCC13     | EMR4P      | NPBWR2         | APRT       | GPFR        |
|        | LOC728724  | EPHB1      | MAT2A      | hsa-mir-551b   | hsa-mir-94 | AANAT       |
| 6a     | LOC100130  | C21orf91-C | PCSK6      | COL4A2         | ACTA1      | LOC100134   |
|        | LOC100131  | GAP43      | DDHD2      | hsa-mir-3118-6 | hsa-mir-31 | RCN2        |
|        | MIR1205    | POTED      | TRIM7      | hsa-mir-939    | FOXD4      | hsa-mir-19  |
| 24     | MIR1206    | GATA2      | TFEB       | CETN1          | hsa-mir-12 | ZNF282      |
|        | MIR1207    | LOC388815  | RLN1       | POLE           | ARHGAP32   | NIPAL3      |
|        | MIR1204    | GOLGB1     | CFL2       | DTYMK          | MRPL36     | NPR2        |

|      |           |           |          |                |            |             |
|------|-----------|-----------|----------|----------------|------------|-------------|
|      | MIR1208   | LINC00478 | TFDP1    | C9orf53        | RNPEPL1    | RLN2        |
|      | ZHX1-C8OF | GP9       | FLII     | C10orf108      | RIMBP2     | NBPF7       |
|      | MIR4663   | ANKRD20A  | MMP27    | CASP3          | THBS2      | CNST        |
| 42   | PCAT1     | GSK3B     | FLJ25758 | ERICH1         | AES        | METTTL21B   |
|      |           | MIRLET7C  | SFTPB    | hsa-mir-429    | BAI3       | hsa-mir-15  |
|      |           | GTF2E1    | SNRPA1   | ZNF606         | APBA2      | MAK         |
| 84   |           | MIR125B2  | LSM1     | THEG           | GRM6       | hsa-mir-7-2 |
|      |           | GYG1      | TRIM52   | LOC100128239   | MAPKBP1    | ICA1        |
|      |           | MIR99A    | MED20    | PTPRN2         | hsa-mir-33 | ACOX1       |
|      |           | HCLS1     | RLN2     | RNH1           | RCBTB2     | TYRO3P      |
|      |           | TEKT4P2   | COCH     | NF1            | hsa-mir-58 | hsa-mir-55  |
|      |           | HGD       | CUL4A    | CACNA1B        | C16orf3    | CUL1        |
| 03   |           | MIR3156-3 | LLGL1    | FAM150B        | hsa-mir-32 | GRHL3       |
|      |           | ITGB5     | C11orf70 | OR2C3          | ACTN2      | RMRP        |
|      |           | MIR3687   | MBD3L4   | DUX4           | hsa-mir-54 | SLC1A1      |
| 36   |           | KPNA1     | RNF103   | TXNL4A         | MLANA      | LOC255654   |
|      |           | MIR3648   | NR2F2    | HTR1B          | hsa-mir-21 | MARCH9      |
|      |           | LSAMP     | WHSC1L1  | C21orf56       | ADAMTS8    | hsa-mir-30  |
|      |           | C21orf37  | TRIM41   | FOXD4          | LPCAT1     | NEDD9       |
|      |           | TM4SF1    | FRS3     | HDAC4          | OTOS       | ACAN        |
|      |           | MBNL1     | SLC1A1   | DUSP22         | TMEM132I   | LFNG        |
| 41   |           | MCM2      | FOXG1    | ARSA           | C6orf123   | ACTG1       |
|      |           | CD200     | PROZ     | CASP5          | AMH        | PSTPIP1     |
|      |           | MYLK      | MFAP4    | hsa-mir-4271   | BCKDHB     | hsa-mir-42  |
| 72   |           | NCK1      | TMEM123  | SDHA           | CHRM5      | PDIA4       |
|      |           | NDUFB4    | MBD3L3   | DMRTA2         | HNRNPAB    | C1orf201    |
|      |           | P2RY1     | VAMP8    | CPNE8          | RTF1       | TESK1       |
|      |           | PCCB      | CHSY1    | MUC4           | hsa-mir-49 | RCL1        |
|      |           | PFN2      | PPAPDC1B | APOLD1         | CPB2       | AGAP2       |
|      |           | PIK3CB    | BTNL9    | hsa-mir-4281   | hsa-mir-21 | ADCY8       |
| 94   |           | PLOD2     | USP49    | MYT1           | CA5A       | RREB1       |
|      |           | PLS1      | RCL1     | hsa-mir-720    | hsa-mir-42 | ALDH1A3     |
|      |           | PLSCR1    | GPR33    | hsa-mir-3118-4 | PARP1      | NUDT1       |
| 5a-1 |           | PLXNA1    | RASA3    | CYC1           | hsa-mir-58 | BIRC5       |
|      |           | PPP2R3A   | MAPK7    | TYMS           | GLDC       | SNUPN       |
|      |           | RAP2B     | SUCLG1   | PXMP2          | hsa-mir-22 | ADAR        |
|      |           | RASA2     | SYNM     | SEPT2          | ZBTB44     | SSPO        |
|      |           | RBP1      | LETM2    | CDKN2B-AS1     | CLPTM1L    | IL28RA      |
|      |           | RBP2      | OR2V2    | DCTD           | DUSP28     | TLN1        |
| 8    |           | RHO       | PRICKLE4 | ZNF596         | FLJ31485   | INSL6       |
|      |           | RPN1      | INSL6    | hsa-mir-1302-2 | UNC93A     | BAI1        |
|      |           | RYK       | FOXA1    | ZSCAN1         | ATP5D      | SSR1        |
|      |           | SIAH2     | ATP11A   | MIER2          | CGA        | ANPEP       |
|      |           | SLC15A2   | PRPSAP2  | MIR4697        | CHRNA7     | PDGFA       |
|      |           | SLCO2A1   | ST3GAL5  | VIPR2          | HNRNPH1    | ARHGDI      |
|      |           | HLTF      | OR4F4    | IFITM1         | MGA        | TSPAN3      |
|      |           | TF        | RNF5P1   | OMG            | hsa-mir-61 | ARNT        |

|      |         |           |              |            |           |
|------|---------|-----------|--------------|------------|-----------|
| 5    | TFDP2   | SNORD95   | ENTPD2       | ELF1       | CNTNAP2   |
|      | TM4SF4  | MRPS10    | FAM110C      | hsa-mir-10 | LOC284632 |
|      | TRH     | KDM4C     | C1orf150     | CBFA2T3    | TPM2      |
|      | TRPC1   | NFKBIA    | DUX2         | hsa-mir-19 | CD274     |
| 4    | UPK1B   | MCF2L     | ADNP2        | AGT        | CYC1      |
|      | UMPS    | SHMT1     | IMPG1        | ACAT2      | TFAP2A    |
|      | CLRN1   | TMSB10    | DMRT2        | INSL4      | BLM       |
|      | ZIC1    | LINS      | MGC16025     | hsa-mir-31 | PMS2      |
| 4    | CNBP    | C8orf86   | FOXQ1        | PRDM10     | CD7       |
|      | ZNF80   | SNORD96A  | CHKB         | SDHAP3     | HMG20A    |
|      | ZNF148  | TRERF1    | CARD18       | MIR149     | BGLAP     |
|      | RAB7A   | RANBP6    | hsa-mir-191  | LOC10019C  | ZNF777    |
| 4    | SOX14   | PAX9      | SLC6A3       | SMOC2      | C1orf130  |
|      | BFSP2   | TMCO3     | SYT10        | AZU1       | RECK      |
|      | RUVBL1  | SREBF1    | PCYT1A       | CNR1       | AK3       |
|      | B4GALT4 | GNLY      | MIR613       | GABRA5     | CYP11B1   |
| 6    | SNX4    | SELS      | hsa-mir-1271 | LTC4S      | GCM2      |
|      | NR1I2   | ZFP62     | OPRL1        | RPAP1      | CHD2      |
|      | MBD4    | TAF8      | hsa-mir-1263 | hsa-mir-61 | PRKAR1B   |
|      | H1FX    | CD274     | APBA2        | ESD        | CDK3      |
| 6    | KALRN   | PRKD1     | GPT          | hsa-mir-14 | SIN3A     |
|      | COPB2   | DCUN1D2   | YES1         | CDH13      | CHRNB2    |
|      | CHST2   | TOP3A     | ZNF10        | hsa-mir-55 | ZNF398    |
|      | STXBP5L | TGOLN2    | PDCD1        | ARF1       | RCAN3AS   |
| 89-2 | RNF7    | TTC23     | F11          | ARG1       | RGP1      |
|      | GUCA1C  | LOC729678 | OR4F21       | JAK2       | C9orf68   |
|      | IQCB1   | C6orf132  | CDK11B       | ABR        | CYP11B2   |
|      | DZIP3   | AK3       | LOC100128398 | TMEM45B    | CDYL      |
| 44-2 | TSC22D2 | PSMA6     | OR4F17       | LOC728613  | FES       |
|      | P2RY14  | PCID2     | NCAPG2       | PP14571    | RAC1      |
|      | COX17   | RNF112    | IFITM3       | FRMD1      | CSNK1D    |
|      | CD96    | USP39     | MIR4733      | CIRBP      | FBXO22    |
| 89-2 | STAG1   | LRRK1     | FUT7         | COL9A1     | CKS1B     |
|      | POLQ    | OR4F29    | LOC148824    | GABRB3     | ZNF767    |
|      | ALDH1L1 | TOMM6     | MTG1         | MGAT1      | MELK      |
|      | PDIA5   | C9orf68   | KCNG2        | MIR626     | CDC37L1   |
| 44-2 | TOPBP1  | SRP54     | MYO6         | hsa-mir-12 | EEF1D     |
|      | HHLA2   | GRTP1     | KANK1        | FOXO1      | LY86      |
|      | FSTL1   | ULK2      | TWIST2       | hsa-mir-31 | IDH2      |
|      | MRPL3   | VAMP5     | HUS1B        | CDH15      | RPA3      |
| 44-2 | RNF13   | TM2D3     | CPT1B        | hsa-mir-13 | SLC25A10  |
|      | MGLL    | LOC100132 | CARD16       | CAPN2      | SCAPER    |
|      | MRAS    | CDC37L1   | hsa-mir-711  | CCR6       | CLK2      |
|      | COPG    | SSTR1     | SLC9A3       | PTPRD      | KRBA1     |
| 44-2 | MYH15   | ADPRHL1   | PPP1R2       | ACADVL     | RUSC2     |
|      | TMCC1   | PEMT      | hsa-mir-585  | ADAMTS15   | C9orf46   |
|      | PLXND1  | IMMT      | PTK6         | MIR4277    | GLI4      |

|      |         |           |               |             |           |
|------|---------|-----------|---------------|-------------|-----------|
| 8f-3 | DNAJC13 | ARRDC4    | hsa-mir-16-2  | TTLL2       | EEF1E1    |
|      | U2SURP  | LOC100132 | NBEAP1        | CNN2        | IGF1R     |
|      | C3orf27 | C9orf46   | GRINA         | COL12A1     | FSCN1     |
| 8p   | ANAPC13 | NKX2-1    | USP14         | GABRG3      | EVPL      |
|      | ARMC8   | FAM70B    | ZNF26         | MAPK9       | IMP3      |
|      | C3orf17 | FBXW10    | FARP2         | JMJD7       | CTSK      |
|      | WWTR1   | POLR1A    | ACSL1         | APAF1       | ZNF786    |
|      | PVRL3   | LOC91948  | RPL23AP53     | MLNR        | GNE       |
|      | ZBTB20  | LOC100133 | DFFB          | hsa-mir-130 | PDCD1LG2  |
|      | FAM162A | KIAA1432  | C2CD4C        | COX4I1      | GML       |
|      | PCOLCE2 | AKAP6     | WDR60         | hsa-mir-76  | FARS2     |
|      | SEC22A  | FLJ44054  | IFITM2        | LYST        | ISG20     |
| 3    | NPHP3   | RAI1      | GRIN1         | CTGF        | ZNF12     |
|      | ATP2C1  | RNF181    | OR2W5         | RFX3        | FASN      |
|      | MORC1   | TARSL2    | SYCE1         | ALOX12      | ISL2      |
|      | SERP1   | MIR4638   | RBFA          | SNX19       | CTSS      |
|      | ACAD9   | ERMP1     | SENP6         | DACT2       | ZNF425    |
|      | ASTE1   | KIAA0391  | CBWD1         | CSNK1G2     | CREB3     |
| 77   | KLF15   | FLJ41484  | OR6B3         | COL19A1     | GLIS3     |
|      | GTPBP8  | GRAP      | LOC285768     | IPW         | GPR20     |
|      | TAGLN3  | MRPL35    | TYMP          | PROP1       | RPP40     |
|      | GPR171  | LRRC28    | CARD17        | ARL1        | MAN2A2    |
|      | SEC61A1 | LOC100859 | hsa-mir-2115  | GTF2F2      | AIMP2     |
|      | PIK3R4  | PDCD1LG2  | TERT          | hsa-mir-31  | FDXR      |
|      | PODXL2  | AP4S1     | TFRC          | CYBA        | PEAK1     |
|      | TRAT1   | LINC00552 | hsa-mir-218-2 | hsa-mir-18  | ECM1      |
|      | COMMD2  | AKAP10    | SRMS          | CHRM3       | LOC155060 |
| !    | A4GNT   | CHMP3     | AADAC         | EPB41L2     | UNC13B    |
|      | DBR1    | ASB7      | GABRA5        | RLN1        | PPAPDC2   |
|      | CLDN18  | TPD52L3   | HSF1          | ALOX12B     | GPT       |
|      | TIMMDC1 | BAZ1A     | THOC1         | LINC00167   | SLC35B3   |
|      | PLA1A   | MCF2L-AS1 | ZNF84         | TCP10L2     | MEF2A     |
|      | AMOTL2  | EPN2      | STK25         | DAPK3       | MAFK      |
| 80   | CCRL1   | RETSAT    | FAT1          | COX7A2      | FOXJ1     |
|      | RAB6B   | LYSMD4    | DVL1          | MEIS2       | C15orf5   |
|      | SELT    | IL33      | WASH5P        | ZNF354A     | EFNA1     |
|      | FBXO40  | SCFD1     | ESYT2         | ASCL1       | ZNF746    |
|      | P2RY13  | LOC100506 | PKP3          | GUCY1B2     | SPAG8     |
|      | IL20RB  | USP22     | SSNA1         | hsa-mir-121 | MIR101-2  |
|      | GPR87   | PTCD3     | PRAP1         | DPEP1       | GRINA     |
|      | SEMA5B  | PGPEP1L   | PQLC1         | hsa-mir-122 | NRN1      |
|      | XRN1    | UHRF2     | FILIP1        | EPHX1       | MFGE8     |
|      | WDR5B   | HECTD1    | DMRT3         | EYA4        | MAD1L1    |
|      | PARP14  | B9D1      | LOC150935     | RLN2        | GAA       |
|      | GRAMD1C | KDM3A     | MAPK11        | ALOX12P2    | LINGO1    |
|      | ROPN1   | LOC145820 | LOC643733     | MLLT4-AS1   | EFNA3     |
|      | SIDT1   | KIAA2026  | hsa-mir-1226  | CFD         | ATP6V0E2  |

2

9c

1

,

|          |           |                  |            |           |
|----------|-----------|------------------|------------|-----------|
| SLC41A3  | HEATR5A   | TRIP13           | EEF1A1     | SIT1      |
| SLC35A5  | FAM18B1   | TNK2             | TRPM1      | HSF1      |
| IFT57    | KCMF1     | hsa-mir-103-1-as | SQSTM1     | TMEM14C   |
| MSL2     | SPATA8    | TCEA2            | ATP2B1     | NTRK3     |
| FAIM     | GLIS3     | AGTR1            | HTR2A      | EIF3B     |
| SLC25A36 | NKX2-8    | GABRB3           | hsa-mir-37 | GALK1     |
| DPPA4    | MYO15A    | TONSL            | FANCA      | UBE2Q2    |
| TMEM39A  | RMND5A    | NDC80            | hsa-mir-31 | EFNA4     |
| ABHD10   | ADAMTS17  | ZNF140           | GALNT2     | ZNF467    |
| CDV3     | PPAPDC2   | ATG4B            | ESR1       | TMEM8B    |
| IFT122   | STRN3     | FRG1             | SLC1A1     | KCNQ3     |
| WDR52    | RASD1     | MEGF6            | ALOX15     | ELOVL2    |
| EAF2     | REEP1     | FLJ45445         | HGC6.3     | FURIN     |
| MUC13    | DNM1P46   | LOC154822        | ARID3A     | CYTH3     |
| SUCNR1   | MIR101-2  | SIRT3            | EPHA7      | GCGR      |
| C3orf37  | MBIP      | CLIC3            | NDN        | C15orf27  |
| MRPS22   | ALKBH5    | PAOX             | ADAMTS2    | ENSA      |
| POGLUT1  | TCF7L1    | PARD6G           | BTG1       | C7orf33   |
| BBX      | CERS3     | PHIP             | KPNA3      | OR2S2     |
| PLSCR2   | MIR4665   | DOCK8            | hsa-mir-14 | LY6E      |
| PLSCR4   | PPP2R3C   | OR6B2            | FOXF1      | PAK1IP1   |
| ISY1     | MED9      | MAPK12           | hsa-mir-10 | PCSK6     |
| HEG1     | ELMOD3    | ACY1             | GNG4       | KIAA0415  |
| KIAA1257 | FAM169B   | PDCD6            | FUCA2      | UTS2R     |
| ARHGAP31 | G2E3      | ACAP2            | SMARCA2    | NRG4      |
| KIAA1407 | SLC47A1   | hsa-mir-146a     | ALOX15B    | FDPS      |
| KIAA1524 | ATOH8     | TPD52L2          | EEF2       | LOC401431 |
| SRPRB    | WASH3P    | BCHE             | GABRR1     | GBA2      |
| BPESC1   | EAPP      | GABRG3           | OCA2       | LY6H      |
| EEFSEC   | C17orf39  | RPL8             | MAML1      | LYRM4     |
| CLSTN2   | LOC90784  | SMCHD1           | CRY1       | PLIN1     |
| POPDC2   | FLJ42289  | ZNF268           | LCP1       | KDELRL2   |
| ATG3     | SNX6      | THAP4            | hsa-mir-58 | GPS1      |
| CCDC14   | FAM106A   | HSP90AA4P        | FOXL1      | ODF3L1    |
| P2RY12   | C2orf89   | GABRD            | hsa-mir-31 | FLG       |
| TMEM108  | OR4F6     | FAM138F          | GUK1       | ZNF862    |
| ZXDC     | NPAS3     | MIR153-2         | GPR31      | HINT2     |
| ZBED2    | LRRC48    | BET1L            | TYRP1      | TONSL     |
| HSPBAP1  | TMEM150   | TUBB4B           | ARRB2      | MUTED     |
| C3orf52  | OR4F15    | C10orf125        | EFNA2      | POLG      |
| QTRTD1   | NUBPL     | ATP9B            | GABRR2     | ADAP1     |
| CCDC48   | ATPAF2    | TMEM30A          | RYR3       | GRB2      |
| NEK11    | SH2D6     | C9orf66          | GFPT2      | LOC253044 |
| UBA5     | FAM138E   | FLJ43879         | DCN        | GBA       |
| C3orf36  | BRMS1L    | SBF1             | MAB21L1    | ZNF783    |
| NAA50    | SPECC1    | ALAS1            | hsa-mir-87 | C9orf100  |
| CEP63    | LOC28495C | SLC12A7          | FOXC2      | PLEC      |

|           |           |              |            |           |
|-----------|-----------|--------------|------------|-----------|
| CEP70     | GPCRLTM7  | UBXN7        | ABCA4      | TXNDC5    |
| ABTB1     | INSM2     | hsa-mir-3142 | H3F3A      | RLBP1     |
| TMEM22    | SMCR7     | TNFRSF6B     | GRM1       | IQCE      |
| PARP9     | FUNDC2P2  | CP           | VLDLR      | GRIN2C    |
| ESYT3     | DDX11L1   | IPW          | ASGR1      | SNX33     |
| EIF2A     | ARHGAP5   | ZNF7         | ELANE      | GBAP1     |
| ZIC4      | SLC5A10   | CLUL1        | HTR1B      | MIR548F3  |
| ACAD11    | C2orf68   | P2RX2        | SCG5       | FP588     |
| CHCHD6    | DDX11L9   | GAL3ST2      | GNB2L1     | PTK2      |
| HPS3      | SLC25A21  | ING2         | EPYC       | TMEM14B   |
| SLC12A8   | SMCR5     | GNB1         | SMAD9      | SNRPA1    |
| RETNLB    | SNORD94   | FAM138A      | hsa-mir-88 | SUN1      |
| CCDC54    | MIR1469   | MIR595       | GALNS      | H3F3B     |
| DIRC2     | EGLN3     | SIGIRR       | ACADM      | LOC645752 |
| C3orf15   | SMCR8     | NOXA1        | ITPKB      | IL6R      |
| PHLDB2    | RNF103    | CHSPRNP1     | HIVEP2     | MIR548I4  |
| LOC90246  | LOC100507 | HSBP1L1      | KIAA0020   | RNF38     |
| C3orf25   | C14orf126 | IRAK1BP1     | ASGR2      | RPL8      |
| BOC       | TOM1L2    | FAM138C      | GAMT       | RIOK1     |
| SPSB4     | MIR4779   | PRR21        | HTR1E      | NR2F2     |
| ACPL2     | MIR4714   | PPP6R2       | SNRPN      | WIP12     |
| TXNRD3    | MIPOL1    | AMT          | BTNL3      | ICT1      |
| OSBPL11   | SLC47A2   | TPPP         | DUSP6      | FBXO22-AS |
| LRRC58    | LOC100630 | TM4SF19      | RB1        | ILF2      |
| TM4SF18   | CLEC14A   | hsa-mir-1303 | hsa-mir-12 | MIR548F4  |
| MED12L    | TRIM16L   | ARFRP1       | GAS8       | GLIPR2    |
| CLRN1-AS1 | SPTSSA    | CPA3         | ADORA3     | ST3GAL1   |
| CPNE4     | USP32P2   | NDN          | KCNK1      | ADTRP     |
| CCDC58    | RALGAPA1  | ZNF16        | IFNGR1     | ST8SIA2   |
| CD200R1   | TBC1D28   | ENOSF1       | RCL1       | INTS1     |
| TPRA1     | SFTA3     | ANKLE2       | ASPA       | FOXK2     |
| UROC1     | CDRT15L2  | ING5         | GNA11      | DNM1P35   |
| FAM194A   | IGBP1P1   | IRF2         | IMPG1      | IVL       |
| NUDT16    | CCDC144B  | PEX10        | TJP1       | MIR548T   |
| COL6A6    | FAM177A1  | LOC100506585 | MGAT4B     | LOC158376 |
| GRK7      | LGALS9B   | RIC8A        | ELK3       | SLA       |
| RPL32P3   | C14orf23  | MAN1B1       | RFC3       | SNRNP48   |
| H1FOO     | CCDC144N  | FRG2B        | hsa-mir-12 | PEX11A    |
| PISRT1    | MIR624    | LOC100130522 | GCSH       | EIF2AK1   |
| DTX3L     | LOC339240 | LOC100506804 | AGL        | ITGB4     |
| LOC151658 | LOC100129 | WASH1        | LBR        | MIR4313   |
| DPPA2     | CCDC144C  | MIR4269      | IGF2R      | KCNN3     |
| CCDC80    | MIR4307   | ZBED4        | DMRT2      | ATP8B5P   |
| BTLA      | GRAPL     | APEH         | ATP1B2     | TG        |
| ROPN1B    | LOC100505 | EXOC3        | GNA15      | PIP5K1P1  |
| C3orf22   | FAM83G    | ZDHHC19      | ME1        | IQGAP1    |
| SPICE1    | LOC100506 | hsa-mir-3141 | UBE3A      | SNX8      |

|            |          |              |         |           |
|------------|----------|--------------|---------|-----------|
| NUDT16P1   | KRT16P3  | RGS19        | B4GALT7 | LGALS3BP  |
| IGSF11     | MIR4503  | CPB1         | HAL     | LMNA      |
| C3orf30    | EVPLL    | OCA2         | RFXAP   | CCDC107   |
| PARP15     | MIR548AI | DGAT1        | ADRA1B  | TSTA3     |
| DNAJB8     | LGALS9C  | LINC00470    | HSBP1   | C6orf228  |
| GPR156     | SNORA59B | GALNT9       | AK4     | PRC1      |
| CHST13     | SNORA59A | NEU4         | LGALS8  | FTSJ2     |
| KBTBD12    | MIR33B   | KLKB1        | KIF25   | LLGL2     |
| DZIP1L     | ZNF286B  | PRKCZ        | INSL6   | LOR       |
| ALG1L      | MIR1180  | ATHL1        | ATP2A3  | C9orf128  |
| PTPLB      |          | COBRA1       | GNG7    | ZNF7      |
| TIGIT      |          | SPRN         | MYO6    | SYCP2L    |
| LOC201651  |          | MIR2467      | PAR5    | SV2B      |
| C3orf58    |          | SCO2         | TBC1D9B | NXPH1     |
| KIAA2018   |          | ARF4         | IGF1    | MAFG      |
| ZBTB38     |          | PP7080       | TPT1    | MCL1      |
| ZDHHC23    |          | OSTalpha     | ADRB2   | OR13J1    |
| NUP210P1   |          | hsa-mir-1294 | HSD17B2 | ZNF16     |
| COL6A5     |          | PRPF6        | ALX3    | LINC00518 |
| GK5        |          | ECT2         | MTR     | AP3S2     |
| PLCXD2     |          | SNRPN        | LAMA2   | GET4      |
| GCET2      |          | GPAA1        | KDM4C   | NPTX1     |
| LSAMP-AS3  |          | METTL4       | C1QBP   | SMCP      |
| SLC9A9     |          | CHFR         | MKNK2   | HRCT1     |
| LOC285205  |          | CXXC11       | NT5E    | PSCA      |
| DNAJB8-AS1 |          | MTNR1A       | HERC2   | LY86-AS1  |
| RABL3      |          | SCNN1D       | N4BP3   | SEMA4B    |
| IGSF10     |          | PTDSS2       | LTA4H   | CCZ1      |
| SLC9A10    |          | NELF         | TRPC4   | P4HB      |
| ILDR1      |          | LOC619207    | ANXA6   | MEF2D     |
| TRIM42     |          | MIR4440      | IRF8    | MSMP      |
| RAB43      |          | RABL2B       | AMPD1   | LY6D      |
| KY         |          | RHOA         | NID1    | CAGE1     |
| LOC339874  |          | IRX4         | LPA     | CIB1      |
| H1FX-AS1   |          | MUC20        | KANK1   | MIOS      |
| LOC344595  |          | hsa-mir-378  | CD68    | PDE6G     |
| AADACL2    |          | GMEB2        | GPX4    | MTX1      |
| TMPRSS7    |          | MECOM        | PGM3    | FAM166B   |
| CD200R1L   |          | TJP1         | SNURF   | JRK       |
| PAQR9      |          | FOXH1        | OR4F3   | C6orf52   |
| NME9       |          | COLEC12      | LUM     | ABHD2     |
| CCDC37     |          | FBRSL1       | TNFSF11 | RNF216    |
| NPHP3-AS1  |          | D2HGDH       | ATOX1   | PRPSAP1   |
| NMNAT3     |          | TLR3         | MAF     | MUC1      |
| PRR23B     |          | SKI          | AMPD2   | MIR4667   |
| PRR23C     |          | ODF3         | NVL     | DGAT1     |
| PLSCR5     |          | NDOR1        | MAS1    | ERVFRD-1  |

|              |             |          |           |
|--------------|-------------|----------|-----------|
| ANKUB1       | DUX4L7      | RANBP6   | CHSY1     |
| FLJ22763     | MIR4786     | CHD3     | ZNF853    |
| FLJ25363     | MLC1        | MATK     | PYCR1     |
| C3orf72      | C3orf51     | RNY4     | NPR1      |
| LOC401093    | CEP72       | AQR      | GPAA1     |
| MIR198       | TCTEX1D2    | ZNF354C  | PPP1R3G   |
| ARGFX        | hsa-mir-145 | KITLG    | SYNM      |
| ALG1L2       | STMN3       | SUCLA2   | CYP2W1    |
| TXNRD3NB     | GHSR        | ALDH7A1  | PCYT2     |
| TMEM14E      | UBE3A       | MC1R     | PI4KB     |
| COL6A4P2     | RECQL4      | AMY1A    | WISP1     |
| LOC646903    | C18orf56    | PSEN2    | HULC      |
| LOC653712    | NOC4L       | MAP3K4   | GABARAPL1 |
| LINC00488    | LOC728323   | CD274    | HEATR2    |
| SNORA7B      | SORBS2      | CHRN1    | RAC3      |
| SNORA58      | TP73        | GADD45B  | PKLR      |
| MIR567       | SCGB1C1     | ELOVL4   | FOXH1     |
| MIR568       | ANAPC2      | ARHGAP11 | TMEM170E  |
| FAM86HP      | DUX4L6      | C5orf45  | VPS33B    |
| PRR23A       | MIR4441     | MYBPC1   | ZDHHC4    |
| LOC100125556 | MAPK8IP2    | DLEU2    | RFNG      |
| WWTR1-AS1    | CACNA1D     | BNIP1    | PSMB4     |
| LOC100129550 | AHRR        | MVD      | RECQL4    |
| ZBTB20-AS1   | SDHAP1      | AMY1B    | SCARNA27  |
| LOC100289361 | hsa-mir-584 | RAB4A    | MRPL46    |
| MIR1280      | RTEL1       | MAP3K5   | CHST12    |
| MIR548I1     | GYG1        | AK3      | MRPL12    |
| LOC100302640 | MKRN3       | CHRNE    | PSMD4     |
| MIR548H2     | LRRC14      | NFIC     | LRRC14    |
| PVRL3-AS1    | CBX3P2      | MAP3K7   | LOC100130 |
| IGSF11-AS1   | PGAM5       | SLC12A6  | OR4F4     |
| MYLK-AS1     | BOK-AS1     | TMED9    | RADIL     |
| LOC100507032 | DUX4        | MYF5     | SEC14L1   |
| LOC100507389 | TNFRSF4     | TSC22D1  | RAB13     |
| NPHP3-ACAD11 | NLRP6       | CAMK2A   | ZNF623    |
| ISY1-RAB43   | DPP7        | CHMP1A   | MIR3691   |
| MIR4796      | DUX4L5      | AMY1C    | SLCO3A1   |
| MIR4788      | PLXNB2      | RYR2     | PAPOLB    |
| MIR4446      | SLC25A20    | MLLT4    | SECTM1    |
|              | MRPL36      | C9orf68  | RFX5      |
|              | LOC401109   | CLDN7    | HHLA1     |
|              | ADRA1B      | OAZ1     | LOC100506 |
|              | SOX18       | TPBG     | NGRN      |
|              | IL12A       | FAN1     | C1GALT1   |
|              | PAR5        | NHP2     | SRSF2     |
|              | BOP1        | MYF6     | RIT1      |
|              | ROCK1P1     | CCNA1    | NDRG1     |

|                  |          |           |
|------------------|----------|-----------|
| DDX51            | CAMLG    | LOC100506 |
| FAM149A          | PLCG2    | RHCG      |
| MMP23B           | AMY2A    | FAM20C    |
| ANO9             | SRP9     | SGSH      |
| C9orf167         | MYB      | RORC      |
| DUX4L3           | CDC37L1  | KHDRBS3   |
| BRD1             | CRK      | MUTED-TX  |
| CAMP             | POLR2E   | DET1      |
| BRD9             | TTK      | RBAK      |
| MIR570           | GOLGA8A  | SUMO2     |
| ADRB2            | RNF130   | RPS27     |
| LIME1            | PPP1R12A | PTP4A3    |
| KPNA4            | DCLK1    | EEF1E1-ML |
| HERC2            | CANX     | LINS      |
| FBXL6            | RPL13    | C7orf26   |
| LOC647589        | AMY2B    | SRP68     |
| DUX2             | TARBP1   | S100A1    |
| MMP23A           | NMBR     | PUF60     |
| B4GALNT4         | C9orf46  | FANCI     |
| EXD3             | CTNS     | MICALL2   |
| DUX4L2           | MAP2K2   | TBCD      |
| TBC1D22A         | RNGTT    | S100A2    |
| CDC25A           | FAM189A1 | DENND3    |
| IRX1             | CLK4     | MCTP2     |
| SDHAP2           | NFYB     | FBXL18    |
| ANXA6            | KL       | TIMP2     |
| UCKL1            | CCNG1    | S100A3    |
| TM4SF1           | SPG7     | ZC3H3     |
| SNURF            | RHOC     | SELS      |
| OPLAH            | TBCE     | TTYH3     |
| LOC100130238     | OPRM1    | TK1       |
| PDLIM3           | CBWD1    | S100A4    |
| TNFRSF14         | DLG4     | EFR3A     |
| IFITM5           | PRTN3    | MESP1     |
| NPDC1            | TBX18    | USP42     |
| MIR3944          | C15orf2  | CBX4      |
| FAM19A5          | CNOT6    | S100A5    |
| CISH             | NTS      | ARC       |
| ZDHHC11          | ITM2B    | UNC45A    |
| TM4SF19-TCTEX1D2 | CD14     | PSMG3     |
| ATOX1            | GAN      | DNAH17    |
| PCMTD2           | ATP1A1   | S100A6    |
| MBNL1            | LEFTY2   | BOP1      |
| CYFIP1           | PARK2    | RGMA      |
| COMMD5           | KIAA1432 | C7orf50   |
| ZNF605           | DPH1     | GALR2     |
| CLDN22           | RPS15    | S100A7    |

|              |           |           |
|--------------|-----------|-----------|
| TNFRSF18     | HMGN3     | SCRIB     |
| LOC653486    | DKFZP434L | WDR93     |
| MRPL41       | GMCL1P1   | CARD11    |
| NCAPH2       | PAH       | SPHK1     |
| COL7A1       | MTRF1     | S100A8    |
| LPCAT1       | CD74      | LRRC6     |
| BNIP1        | SLC7A5    | AEN       |
| SLC2A4RG     | ATP5F1    | TNRC18    |
| MLF1         | TLR5      | SOCS3     |
| FAM189A1     | PCMT1     | S100A9    |
| CPSF1        | DMRT3     | FBXL6     |
| LOC100507055 | DVL2      | CRTC3     |
| UFSP2        | SGTA      | C7orf70   |
| ISG15        | FHL5      | SLC16A5   |
| LOC100133161 | GREM1     | S100A10   |
| EHMT1        | RMND5B    | OPLAH     |
| MOV10L1      | PAWR      | TTC23     |
| DAG1         | LPAR6     | ZFAND2A   |
| CLPTM1L      | CDC25C    | SLC16A3   |
| CAMK2A       | CDK10     | S100A11   |
| ZNF512B      | BCL9      | EIF2C2    |
| MME          | GPR137B   | MRPS11    |
| C15orf2      | PDCD2     | COX19     |
| CYHR1        | ERMP1     | SYNGR2    |
| CDKN2AIP     | EFNB3     | S100A12   |
| PLCH2        | STK11     | COMMD5    |
| C9orf37      | SNAP91    | LRRK1     |
| MIOX         | TMEM85    | GLCCI1    |
| DNASE1L3     | BTNL8     | HGS       |
| NKD2         | CDK17     | S100A13   |
| CANX         | SLC25A15  | ASAP1-IT1 |
| C20orf195    | CDO1      | TM2D3     |
| CLDN11       | MBTPS1    | KIAA1908  |
| DKFZP434L187 | BRDT      | CYTH1     |
| VPS28        | TP53BP2   | SHC1      |
| ODZ3         | ENPP1     | CPSF1     |
| CEP104       | PDCD1LG2  | C15orf42  |
| SAPCD2       | EIF4A1    | GPR146    |
| PANX2        | TBXA2R    | SLC9A3R1  |
| DOCK3        | CASP8AP2  | SPRR1A    |
| C5orf55      | KLF13     | CYHR1     |
| CCNG1        | ZFP2      | RCCD1     |
| DNAJC5       | SLC25A3   | AMZ1      |
| P2RY1        | LHFP      | RECQL5    |
| MAGEL2       | CDX1      | SPRR1B    |
| FAM203A      | TAF1C     | ASAP1     |
| LRP2BP       | CAPZA1    | ARRDC4    |

|          |           |           |
|----------|-----------|-----------|
| SLC35E2  | TSNAX     | TMEM184/  |
| UAP1L1   | ENPP3     | PGS1      |
| CERK     | DOCK8     | SPRR2A    |
| DUSP7    | EIF5A     | FAM135B   |
| CCDC127  | TCF3      | LOC91948  |
| CD74     | SYNCRIP   | BRAT1     |
| ZGPAT    | MTMR10    | AATK      |
| PFN2     | RUFY1     | SPRR2B    |
| NDNL2    | PMCH      | PHF20L1   |
| EXOSC4   | TRIM13    | TARSL2    |
| STOX2    | AP3S1     | SDK1      |
| RER1     | USP10     | KIAA0195  |
| ARRDC1   | CASQ2     | SPRR2C    |
| ALG12    | WNT9A     | VPS28     |
| CELSR3   | PEX7      | LRRC28    |
| PLEKHG4B | GLIS3-AS1 | FOKK1     |
| CDX1     | ENO3      | EIF4A3    |
| PRIC285  | THOP1     | SPRR2D    |
| SERPINI1 | SLC35A1   | FAM203A   |
| ATP10A   | ZNF770    | ASB7      |
| SLC39A4  | OR4F16    | MMD2      |
| KIAA1430 | RFX4      | ALYREF    |
| NOC2L    | MRPS31    | SPRR2E    |
| WDR85    | CLTB      | KCNK9     |
| CRELD2   | C16orf7   | LYSMD4    |
| FHIT     | CD2       | DAGLB     |
| C5orf38  | HIST3H3   | BAIAP2    |
| CLTB     | PLAGL1    | SPRR2F    |
| ZBTB46   | TPD52L3   | C8orf55   |
| SERPINI2 | FGF11     | PGPEP1L   |
| NIPA2    | TLE2      | CCZ1B     |
| ZNF250   | FUT9      | ATP5H     |
| TRAPPC11 | NOP10     | SPRR2G    |
| OR4F3    | TRIM7     | CHRA1     |
| TMEM203  | SNRPF     | LOC145820 |
| ADM2     | DLEU1     | SLC29A4   |
| FLNB     | CSF1R     | ST6GALNA1 |
| IRX2     | KIAA0513  | SPRR3     |
| CSF1R    | CD53      | EXOSC4    |
| SAMD10   | GNPAT     | C15orf32  |
| PLD1     | PLG       | RSPH10B   |
| CHRFAM7A | IL33      | SEPT9     |
| C8orf33  | GP1BA     | SSR2      |
| MLF1IP   | SF3A2     | LY6K      |
| ARHGEF16 | PNRC1     | HAPLN3    |
| ZMYND19  | NDNL2     | TFAMP1    |
| TRABD    | TRIM52    | RAB40B    |

|             |          |           |
|-------------|----------|-----------|
| GNAI2       | SYT1     | VPS72     |
| LOC285577   | POSTN    | SLC39A4   |
| CSNK1A1     | CSF2     | MESP2     |
| ABHD16B     | PIEZO1   | UNCX      |
| PLOD2       | CD58     | TMC6      |
| ULK4P3      | CDC42BPA | THBS3     |
| GPR172A     | PSMB1    | SLURP1    |
| WWC2        | C9orf123 | SPATA8    |
| SSU72       | GPS2     | COL28A1   |
| SLC34A3     | S1PR4    | AZI1      |
| SELO        | KIAA1009 | TCHH      |
| GNAT1       | C15orf24 | SLC45A4   |
| SLC6A19     | AGXT2L2  | ADAMTS17  |
| NKX2-5      | TDG      | LOC389458 |
| LINC00266-1 | WBP4     | GGA3      |
| PLS1        | CSNK1A1  | TPM3      |
| ULK4P1      | ATP2C2   | ZFAT      |
| ARHGAP39    | CHI3L2   | DNM1P46   |
| SNX25       | DEGS1    | ELFN1     |
| WRAP73      | PTPRK    | JMJD6     |
| C9orf142    | UHRF2    | CCT3      |
| HDAC10      | GUCY2D   | ZNF250    |
| GPX1        | AP3D1    | CERS3     |
| SLC6A18     | ANKRD6   | GRID2IP   |
| DBN1        | AVEN     | EXOC7     |
| C20orf201   | TRIM41   | TUFT1     |
| PLSCR1      | TMPO     | PYCRL     |
| ARHGAP11B   | AKAP11   | LOC254559 |
| ZNF34       | CSNK1G3  | ZNF815    |
| ZFP42       | MPHOSPH6 | KCTD2     |
| SDF4        | CLCA1    | DAP3      |
| TPRN        | TAF1A    | C8orf33   |
| SHANK3      | RPS6KA2  | LOC283738 |
| GRM2        | C9orf66  | RNF216P1  |
| LRRC14B     | HIC1     | WBP2      |
| DOCK2       | APBA3    | PIP5K1A   |
| LINC00176   | RIMS1    | LYNX1     |
| PRKCI       | ATP10A   | LOC283761 |
| SNORD107    | COL23A1  | PMS2CL    |
| SHARPIN     | NR2C1    | FSCN2     |
| ENPP6       | EXOSC8   | ANXA9     |
| MXRA8       | NKX2-5   | C8orf51   |
| PNPLA7      | COX4NB   | FAM169B   |
| TUBGCP6     | CNN3     | FLJ44511  |
| HYAL1       | GGPS1    | NAT9      |
| SDHAP3      | RPS12    | ADAM15    |
| DRD1        | KIAA2026 | GPR172A   |

)

|              |          |           |
|--------------|----------|-----------|
| MIR647       | ITGAE    | ZNF774    |
| PTX3         | MED16    | LOC442497 |
| TUBGCP5      | DOPEY1   | NARF      |
| SCRT1        | GJD2     | SELENBP1  |
| C4orf38      | SCGB3A1  | GSDMD     |
| CPSF3L       | HSP90B1  | C15orf38  |
| C9orf169     | FNDC3A   | MIR339    |
| LOC90834     | CTNNA1   | SAP30BP   |
| IMPDH2       | TUBB3    | PRPF3     |
| LOC728613    | COL11A1  | ZNF696    |
| SLC26A2      | TMEM63A  | KIF7      |
| UCKL1-AS1    | SGK1     | ZNF890P   |
| RAP2B        | KCNV2    | NT5C      |
| NIPA1        | MNT      | ARHGEF2   |
| MAF1         | EBI3     | ARHGAP39  |
| RWDD4        | ZNF292   | ZNF710    |
| C1orf159     | C15orf29 | OCM       |
| ENTPD8       | ZNF354B  | CDR2L     |
| LMF2         | TXNRD1   | SLC25A44  |
| ITIH1        | PDS5B    | ZNF34     |
| MIR4277      | DBN1     | HDDC3     |
| DUSP1        | PRDM7    | MIR589    |
| MIR941-1     | CRYZ     | MRPS7     |
| RARRES1      | TOMM20   | SETDB1    |
| PAR1         | SLC22A1  | SHARPIN   |
| PPP1R16A     | GLIS3    | WASH3P    |
| CCDC111      | MYH10    | RSPH10B2  |
| AURKAIP1     | APC2     | HN1       |
| LRRC26       | MDN1     | UBAP2L    |
| KLHDC7B      | C15orf41 | EPPK1     |
| ITIH3        | OR2Y1    | FLJ42289  |
| LOC100506688 | UBE2N    | LOC729852 |
| EBF1         | KIAA0564 | DCXR      |
| MIR941-4     | DMXL1    | SV2A      |
| SHOX2        | TCF25    | SCRT1     |
| LOC283683    | CSF1     | C15orf58  |
| ZNF251       | URB2     | LOC100131 |
| TRIML2       | SLC22A3  | ANAPC11   |
| MRPL20       | LURAP1L  | DENND4B   |
| C9orf139     | MYO1C    | TRAPPC9   |
| LOC284933    | ABCA7    | OR4F6     |
| ITIH4        | UFL1     | LOC100288 |
| MIR4457      | CHRFAM7A | SIRT7     |
| F12          | BTNL9    | SCAMP3    |
| MIR941-2     | ALX1     | MAF1      |
| SI           | ZC3H13   | OR4F15    |
| OR4N4        | DIAPH1   | RBAK-LOC3 |

|                |           |           |
|----------------|-----------|-----------|
| KIFC2          | ZCCHC14   | TMEM104   |
| CCDC110        | CTBS      | SF3B4     |
| ATAD3A         | LEFTY1    | PARP10    |
| FAM166A        | SLC22A2   | FAM174B   |
| RPL23AP82      | FLJ35024  | MIR4648   |
| LAMB2          | NUP88     | CCDC40    |
| MIR4456        | HMG20B    | HAX1      |
| FABP6          | ORC3      | TIGD5     |
| MIR941-3       | ULK4P3    | LOC400456 |
| SIAH2          | LOC202181 | MIR4655   |
| HERC2P3        | EEA1      | NPLOC4    |
| MFSD3          | SPG20     | C1orf61   |
| CYP4V2         | DOCK2     | PPP1R16A  |
| PANK4          | KIAA0182  | MIR7-2    |
| C9orf173       | CTH       | MIR4656   |
| LOC339685      | SPHAR     | ST6GALNA4 |
| MAP4           | SOD2      | SEMA6C    |
| MIR4635        | PPAPDC2   | ZNF251    |
| FAT2           | OR1D2     | MIR9-3    |
| MIR1914        | UQCR11    | WDR45L    |
| SKIL           | MTO1      | PMVK      |
| GOLGA6L1       | ULK4P1    | KIFC2     |
| ADCK5          | RASGEF1C  | TTLL13    |
| LOC285441      | PPFIA2    | CBX8      |
| TP73-AS1       | LRCH1     | FAM189B   |
| NRARP          | DPYSL3    | NAPRT1    |
| C22orf34       | ATMIN     | ASB9P1    |
| MST1           | CYP2J2    | MIF4GD    |
| FGFR4          | CAPN9     | JTB       |
| LOC100505815   | T         | HPYR1     |
| SLC2A2         | MIR101-2  | FAM138E   |
| GOLGA8G        | OR3A1     | CASKIN2   |
| ZNF252         | SBNO2     | MTMR11    |
| LOC339975      | IBTK      | MFSD3     |
| LRRC47         | ARHGAP11  | LOC100144 |
| FLJ40292       | FAM153A   | RPTOR     |
| CHKB-CPT1B     | GALNT4    | MLLT11    |
| MST1R          | INTS6     | RHPN1     |
| FOXI1          | DRD1      | GPCRLTM7  |
| RTEL1-TNFRSF6B | COTL1     | BAHCC1    |
| HLTF           | DBT       | SLC27A3   |
| GOLGA8IP       | COG2      | TOP1MT    |
| TMED10P1       | TBP       | DDX11L1   |
| TRIML1         | FAM138C   | USP36     |
| HES4           | OR3A2     | TDRKH     |
| TUBBP5         | ZFR2      | LYPD2     |
| FLJ46257       | SENP6     | DDX11L9   |

|              |           |            |
|--------------|-----------|------------|
| PDHB         | ATPBD4    | RNF213     |
| FLT4         | OR2V2     | CELF3      |
| SSR3         | CRADD     | TMEM71     |
| SNORD108     | NUFIP1    | MIR1179    |
| C8orf77      | SLC26A2   | TNRC6C     |
| ANKRD37      | MLYCD     | PMF1       |
| PRDM16       | GADD45A   | COL22A1    |
| RNF224       | RBM34     | MIR1469    |
| IL17REL      | TCF21     | SLC25A19   |
| PFKFB4       | WASH1     | VPS45      |
| GABRA1       | P2RX1     | ADCK5      |
| TERC         | PIP5K1C   | MIR3175    |
| SNORD109A    | SLC17A5   | UBE2O      |
| ZNF517       | SNORD107  | KIAA0907   |
| LOC389247    | ZNF454    | TSNARE1    |
| VWA1         | LIN7A     | LOC100507  |
| MIR602       | NBEA      | DUS1L      |
| FAM116B      | HBEGF     | POGZ       |
| PLXNB1       | CPNE7     | MAPK15     |
| GABRA6       | DPYD      | LOC100507  |
| SEC62        | FBXO28    | FN3K       |
| SNORD109B    | TCP1      | SYT11      |
| KIAA1875     | MIR4665   | ZNF707     |
| HELT         | P2RX5     | C15orf38-A |
| NADK         | HMHA1     | ENGASE     |
| RNF208       | SNORD50A  | RPRD2      |
| PIM3         | PAR1      | BREA2      |
| PRKAR2A      | C5orf60   | MIR3529    |
| GABRB2       | SOCS2     | MRPL38     |
| TM4SF4       | C13orf15  | SMG5       |
| SNORD115-1   | DUSP1     | FAM83H     |
| C8ORFK29     | IL17C     | MIR4714    |
| LOC401164    | DR1       | ASPSCR1    |
| MMEL1        | ABCB10    | SNAPIN     |
| LOC100129722 | TCP10     | LOC286094  |
| ODF3B        | PAFAH1B1  | CARD14     |
| PRKCD        | TIMM13    | RUSC1      |
| GABRG2       | FILIP1    | ZNF252     |
| TRPC1        | LOC145845 | MFSD11     |
| WHAMMP3      | ZNF879    | CA14       |
| SPATC1       | RASSF9    | TMED10P1   |
| FAM92A3      | MED4      | C17orf62   |
| OR4F5        | EBF1      | C1orf43    |
| FAM157B      | ANKRD11   | C8orf77    |
| SYCE3        | S1PR1     | ARMC7      |
| PTPRG        | TAF5L     | CHTOP      |
| GABRP        | TCTE3     | C8orf31    |

|              |          |           |
|--------------|----------|-----------|
| CLRN1        | SERPINF1 | CHMP6     |
| POTEB        | DAZAP1   | LCE2B     |
| C8orf82      | NDUFAF4  | ZFP41     |
| C4orf47      | TMCO5A   | RHBDF2    |
| LINC00115    | MIR340   | SLC39A1   |
| LOC100289341 | NUAK1    | GPIHBP1   |
| LOC100128946 | DNAJC15  | FN3KRP    |
| QARS         | EGR1     | LAMTOR2   |
| GLRA1        | OSGIN1   | NRBP2     |
| ZIC1         | CELSR2   | C17orf101 |
| SNORD64      | DISC2    | TMOD4     |
| LRRC24       | DYNLT1   | ZNF517    |
| DUX4L4       | PER1     | ZNF750    |
| MORN1        | SNORD37  | CERS2     |
| MIR3621      | CYB5R4   | KIAA1875  |
| LOC100144603 | CSNK1A1P | NUP85     |
| RPL29        | SNORD95  | CRNN      |
| GM2A         | NR1H4    | C8ORFK29  |
| KCNAB1       | ALG5     | MYO15B    |
| PAR4         | ETF1     | ZBTB7B    |
| SCXB         | GIN52    | SPATC1    |
| FRG2         | EXTL2    | C17orf70  |
| GLTPD1       | DISC1    | APH1A     |
| MIR3201      | THBS2    | FLJ43860  |
| ATXN7        | PFAS     | TSPAN10   |
| GRK6         | TJP3     | PLEKHO1   |
| B3GALNT1     | UBE2J1   | MAFA      |
| PAR-SN       | OTUD7A   | QRICH2    |
| HEATR7A      | SNORD96A | OAZ3      |
| SLED1        | PLXNC1   | MIR30B    |
| OR4F16       | PHF11    | CBX2      |
| MIR4535      | F12      | DPM3      |
| SEMA3F       | TRAPPC2L | MIR30D    |
| GPX3         | F3       | FBF1      |
| TNFSF10      | CNIH4    | MRPS21    |
| LOC348120    | TNFAIP3  | C8orf82   |
| MIR939       | PFN1     | UNK       |
| FLJ38576     | ITGB1BP3 | ADAMTSL4  |
| CCNL2        | PHIP     | LRRC24    |
| SMARCC1      | SPRED1   | TRIM47    |
| GRIA1        | ZFP62    | CRCT1     |
| GMPS         | CKAP4    | ZFAT-AS1  |
| GOLGA8E      | UFM1     | MAFG-AS1  |
| SCXA         | FABP6    | GON4L     |
| DUX4L6       | BCMO1    | LINC00051 |
| TAS1R3       | FCGR1A   | OTOP2     |
| NEK4         | PYCR2    | C1orf56   |

|              |             |           |
|--------------|-------------|-----------|
| GRM6         | TPD52L1     | C8orf73   |
| SLC33A1      | PITPNA      | CYGB      |
| OR4M2        | SLC39A3     | MSTO1     |
| MIR1234      | AKIRIN2     | SCXB      |
| DUX4L5       | PGBD4       | RNF157    |
| ATAD3B       | CBY3        | GOLPH3L   |
| TCTA         | METAP2      | MIR661    |
| HK3          | SOHLH2      | C1QTNF1   |
| CHST2        | FAT2        | YY1AP1    |
| OR4N3P       | NECAB2      | HEATR7A   |
| DUX4L3       | FCGR1B      | PPP1R27   |
| PLEKHN1      | TRIM17      | UBE2Q1    |
| TKT          | UTRN        | OC90      |
| HMMR         | PLD2        | METTL23   |
| TSC22D2      | ZBTB7A      | FAM63A    |
| HERC2P2      | AKIRIN2-AS1 | LOC731779 |
| LOC728175    | LPCAT4      | SLC38A10  |
| C1orf170     | FAM153C     | ASH1L     |
| TNNC1        | KERA        | MIR937    |
| HNRNPAB      | ENOX1       | CANT1     |
| P2RY14       | FBN2        | LENEP     |
| NF1P2        | KLHDC4      | MIR939    |
| DUX4L2       | FMO5        | USH1G     |
| KIAA1751     | ARID4B      | SLC50A1   |
| UBA7         | EZR         | LOC100128 |
| HNRNPH1      | SERPINF2    | TBC1D16   |
| SMC4         | FZR1        | CDC42SE1  |
| HERC2P9      | DDX43       | SCXA      |
| LOC731424    | C15orf55    | AFMID     |
| LOC115110    | LOC728554   | UBQLN4    |
| USP4         | NUDT4       | CCDC166   |
| HRH2         | RCBTB1      | MGAT5B    |
| PDCD10       | FGF1        | OTUD7B    |
| WHAMMP2      | DEF8        | LOC100133 |
| CLDN24       | GBP1        | C17orf56  |
| ACAP3        | EGLN1       | RAB25     |
| UQCRC1       | VIP         | LOC100288 |
| NDST1        | POLR2A      | B3GNTL1   |
| RNF13        | SIRT6       | PGLYRP4   |
| LOC503519    | FAM46A      | MIR1234   |
| LOC100288255 | LOC28371C   | RBFOX3    |
| UBE2J2       | AACSP1      | RHBG      |
| WNT5A        | UHRF1BP1    | LOC100507 |
| HTR4         | NUDT15      | CD300LF   |
| SLITRK3      | FGFR4       | ATP8B2    |
| CHEK2P2      | BANP        | MIR4472-1 |
| MIR1305      | GBP2        | NOTUM     |

|      |              |           |           |
|------|--------------|-----------|-----------|
|      | PUSL1        | KIAA1383  | PBXIP1    |
|      | IFRD2        | STL       | MIR4664   |
|      | IL12B        | PSMB6     | TMC8      |
|      | NLGN1        | PIAS4     | S100A14   |
| 1534 | LOC646214    | TMEM30A   | STRA13    |
|      | MIR3945      | GOLGA8G   | GATAD2B   |
|      | B3GALT6      | LOC729678 | LRRC45    |
|      | MAPKAPK3     | KIAA1033  | CGN       |
|      | ITK          | KIAA1704  | TRIM65    |
|      | PLCH1        | FOXI1     | ZNF687    |
|      | CXADRP2      | ZDHHC7    | UNC13D    |
|      | LOC100506229 | GBP3      | HCN3      |
| 1417 | TPRG1L       | SUSD4     | MYADML2   |
|      | SEMA3B       | EPM2A     | PRUNE     |
|      | KCNMB1       | RPA1      | NPB       |
|      | TNIK         | LSM7      | SEMA4A    |
|      | LOC646278    | LMBRD1    | FADS6     |
|      | FAM213B      | SNORD108  | MRPL9     |
|      | SLMAP        | OR4F29    | C17orf28  |
|      | LCP2         | MGAT4C    | INTS3     |
| 1062 | U2SURP       | FAM48A    | TSEN54    |
|      | REREP3       | FLT4      | SCNM1     |
|      | ACTRT2       | CENPN     | FAM100B   |
|      | MANF         | GFI1      | TNFAIP8L2 |
|      | LTC4S        | HEATR1    | TMEM235   |
|      | WWTR1        | STX7      | C1orf54   |
|      | LOC653061    | RPL26     | CCDC57    |
|      | MIB2         | MBD3      | PAQR6     |
| 1287 | ACOX2        | KCNQ5     | HEXDC     |
|      | MFAP3        | SNORD109  | TRIM46    |
|      | TIPARP       | LOC100132 | SLC26A11  |
|      | LOC653075    | UTP20     | TARS2     |
|      | SAMD11       | CYSLTR2   | ENDOV     |
|      | BAP1         | GABRA1    | FLAD1     |
|      | MGAT1        | C16orf61  | C17orf89  |
|      | ARHGEF26     | GJA5      | SNX27     |
| 1331 | SNORD116-19  | ENAH      | LINC00482 |
|      | LOC148413    | PEX3      | ANP32E    |
|      | HYAL3        | SHBG      | TMEM105   |
|      | MSX2         | PCSK4     | HORMAD1   |
|      | PCOLCE2      | RARS2     | METRNL    |
|      | GOLGA6L6     | SNORD109  | TMEM79    |
|      | CCDC27       | LOC100132 | RAB37     |
|      | CADPS        | MRPL42    | LCE3D     |
| 1445 | NPM1         | SPRYD7    | ENPP7     |
|      | GPR160       | GABRA6    | AQP10     |
|      | LOC727924    | JPH3      | C17orf90  |

612

69

|            |           |           |
|------------|-----------|-----------|
| CALML6     | GJA8      | PYGO2     |
| HYAL2      | NUP133    | CCDC137   |
| PDE6A      | RNASET2   | NUP210L   |
| SERP1      | SLC2A4    | ARL16     |
| GOLGA8C    | C19orf24  | MEX3A     |
| C1orf86    | C6orf162  | OTOP3     |
| HESX1      | SNORD115  | C1orf85   |
| PDGFRB     | LOC100133 | FAM195B   |
| GOLIM4     | CCDC59    | PGLYRP3   |
| PWRN1      | COG6      | ZACN      |
| ATAD3C     | GABRB2    | THEM4     |
| BSN        | KIAA1609  | AATK-AS1  |
| MAPK9      | GCLM      | GABPB2    |
| GPR171     | ERO1LB    | FLJ43681  |
| PWRN2      | STX11     | TCHHL1    |
| LOC254099  | SOX15     | FLJ45079  |
| RRP9       | PLEKHJ1   | RPTN      |
| PROP1      | LYRM2     | TEX19     |
| SCHIP1     | FMN1      | TDRD10    |
| SNORD116-1 | MIR1229   | MXRA7     |
| TTLL10     | HCFC2     | SHE       |
| CACNA2D2   | NAA16     | FLJ90757  |
| RARS       | GABRG2    | DCST2     |
| NMD3       | WFDC1     | MIR338    |
| SNORD116-2 | GNAI3     | C1orf182  |
| FAM41C     | FMN2      | C17orf109 |
| VPRBP      | SYNJ2     | S100A16   |
| RPS14      | VAMP2     | LINC00338 |
| COMMD2     | BTBD2     | CREB3L4   |
| SNORD116-3 | SNX14     | SCARNA16  |
| C1orf174   | SNORD64   | C1orf51   |
| IP6K1      | MIR4638   | SNORD1A   |
| SGCD       | SYCP3     | LELP1     |
| RSRC1      | RNASEH2B  | SNORD1B   |
| SNORD116-4 | GABRP     | DCST1     |
| KLHL17     | MTHFSD    | SNORD1C   |
| PSMD6      | GNAT2     | BNIP1     |
| SLC6A7     | ADCK3     | MIR636    |
| SELT       | VNN2      | SPRR4     |
| SNORD116-5 | TP53      | MIR657    |
| TMEM240    | CCDC94    | LCE4A     |
| PARP3      | FAM135A   | PRCD      |
| SLC34A1    | PAR4      | KRTCAP2   |
| P2RY13     | LOC100855 | C17orf110 |
| SNORD116-6 | CHST11    | CRTC2     |
| TMEM52     | KIAA0226L | LOC100131 |
| RBM6       | GDF9      | LCE5A     |

|             |          |           |
|-------------|----------|-----------|
| SLIT3       | DBNDD1   | TEN1      |
| GPR87       | GNG5     | RIIAD1    |
| SNORD116-7  | GJC2     | C17orf99  |
| AGRN        | VNN1     | THEM5     |
| RBM5        | UBE2G1   | LOC100287 |
| SNCB        | NCLN     | RUSC1-AS1 |
| MYNN        | RRAGD    | LOC100294 |
| SNORD116-8  | PAR-SN   | S100A7A   |
| FAM132A     | CCDC53   | MIR1250   |
| NME6        | PROSER1  | LINGO4    |
| SPARC       | GFRA3    | MIR4316   |
| EIF5A2      | KLHL36   | RXFP4     |
| SNORD116-9  | GSTM1    | MIR3065   |
| HES5        | SIPA1L2  | LCE1A     |
| TRAIP       | TAAR5    | MIR3186   |
| STK10       | TRPV1    | LCE1B     |
| SUCNR1      | SPPL2B   | MIR3678   |
| SNORD116-10 | BACH2    | LCE1C     |
| LOC388588   | MIR211   | MIR3615   |
| ARIH2       | CCDC41   | LCE1D     |
| ZNF354A     | CDADC1   | LOC100507 |
| LXN         | GLRA1    | LCE1E     |
| SNORD116-11 | FBXO31   | LOC100507 |
| RNF223      | GSTM2    | LCE1F     |
| NPRL2       | ZP4      | LOC100507 |
| TCOF1       | MAP7     | LCE2A     |
| CCNL1       | YWHAE    | LOC100507 |
| SNORD116-12 | SHD      | LCE2C     |
| MIR200A     | SMAP1    | TEN1-CDK3 |
| CSPG5       | HERC2P9  | LCE2D     |
| TTC1        | NT5DC3   | MIR4739   |
| PLSCR2      | CAB39L   | LCE3A     |
| SNORD116-13 | GM2A     | MIR4738   |
| MIR200B     | CMIP     | LCE3B     |
| USP19       | GSTM3    | MIR4740   |
| STC2        | RHOU     | LCE3C     |
| PLSCR4      | LATS1    | MIR4730   |
| SNORD116-14 | ZNF232   | LCE3E     |
| FLJ42875    | WDR18    | LOC100653 |
| SLC38A3     | C6orf164 | LYSMD1    |
| ADAM19      | WHAMMP   | HRNR      |
| NCEH1       | PARPBP   | FLG2      |
| SNORD116-15 | COG3     | C1orf189  |
| ANKRD65     | GRK6     | VHLL      |
| CYB561D2    | CDT1     | MIR9-1    |
| FGF18       | GSTM4    | KPRP      |
| IFT80       | ACBD3    | LCE6A     |

|             |           |           |
|-------------|-----------|-----------|
| SNORD116-16 | TAAR2     | PRR9      |
| MIR429      | OR1A1     | LOC645676 |
| TMEM115     | REXO1     | POU5F1P4  |
| SQSTM1      | OGFRL1    | S100A7L2  |
| SLC7A14     | GOLGA8B   | SCARNA4   |
| SNORD116-17 | SLC6A15   | SNORA42   |
| FAM138F     | SETDB2    | MIR554    |
| RPP14       | GPX3      | MIR555    |
| ATP6V0E1    | MAP1LC3B  | MIR92B    |
| MFSD1       | GSTM5     | MIR190B   |
| SNORD116-18 | ARV1      | C1orf68   |
| LOC643837   | TAAR3     | MSTO2P    |
| FAM107A     | OR1D5     | LOC100132 |
| PTTG1       | ZNF77     | C2CD4D    |
| FNDC3B      | MANEA     | MIR4257   |
| SNORD116-20 | LOC503515 | MIR4258   |
| TMEM88B     | RIC8B     | LOC100505 |
| WDR6        | KBTBD7    | PMF1-BGL  |
| PDLIM7      | GRIA1     | TNFAIP8L2 |
| P2RY12      | DYNLRB2   |           |
| SNORD116-21 | GTF2B     |           |
| C1orf233    | AIDA      |           |
| RASSF1      | MED23     |           |
| CNOT8       | OR1E1     |           |
| VEPH1       | C19orf29  |           |
| SNORD116-22 | LINC00472 |           |
| FAM138A     | LOC646278 |           |
| NISCH       | APPL2     |           |
| HAND1       | EBPL      |           |
| ZBBX        | NR3C1     |           |
| SNORD116-23 | HSDL1     |           |
| WASH7P      | HMGCS2    |           |
| TREX1       | JMJD4     |           |
| MED7        | QKI       |           |
| LRRC31      | OR1E2     |           |
| SNORD116-24 | CELF5     |           |
| MIR551A     | KHDC1     |           |
| TUSC2       | LOC653075 |           |
| ADAMTS2     | DRAM1     |           |
| PHC3        | KBTBD6    |           |
| SNORD116-25 | GRM6      |           |
| CDK11A      | CRISPLD2  |           |
| TWF2        | HSD3B1    |           |
| CLINT1      | C1orf35   |           |
| ARL14       | AKAP7     |           |
| SNORD115-2  | OR1G1     |           |
| SLC35E2B    | TLE6      |           |

|              |             |
|--------------|-------------|
| DHX30        | GPR63       |
| MAML1        | ANP32AP1    |
| SPATA16      | STAB2       |
| SNORD116-26  | STARD13     |
| LOC728716    | HARS        |
| SCAP         | SPIRE2      |
| GFPT2        | HSD3B2      |
| EIF2A        | TTC13       |
| SNORD116-27  | TBPL1       |
| LOC729737    | OR3A3       |
| LAMB2P1      | LPPR3       |
| G3BP1        | SPACA1      |
| ZIC4         | SNORD116-19 |
| SNORD115-3   | VEZT        |
| OR4F29       | EPSTI1      |
| RAD54L2      | HINT1       |
| TNIP1        | ZNF469      |
| HPS3         | IGSF3       |
| SNORD115-4   | PGBD5       |
| LOC100129534 | WTAP        |
| STAB1        | SLC25A11    |
| GNB2L1       | ZNF556      |
| ARPM1        | SH3BGRL2    |
| SNORD115-5   | PWRN1       |
| LOC100130417 | GOLGA2P5    |
| FAM208A      | ARL11       |
| SLU7         | HK3         |
| GFM1         | CENPBD1     |
| SNORD115-6   | CYR61       |
| LOC100132062 | HHIPL2      |
| KLHL18       | AKAP12      |
| RGS14        | DOC2B       |
| EGFEM1P      | FAM108A1    |
| SNORD115-7   | GJA10       |
| LOC100132287 | PWRN2       |
| NAT6         | SCYL2       |
| CPLX2        | WDFY2       |
| TM4SF18      | HMMR        |
| SNORD115-8   | ZNF276      |
| LOC100133331 | IL12RB2     |
| ABHD14A      | PCNXL2      |
| C5orf4       | KIAA0408    |
| MED12L       | SCARF1      |
| SNORD115-9   | DOHH        |
| LOC100133445 | C6orf7      |
| POC1A        | SNORD116-1  |
| FAM114A2     | POLR3B      |

|              |            |
|--------------|------------|
| CLRN1-AS1    | LINC00284  |
| SNORD115-10  | HNRNPAB    |
| LOC100133612 | KCNG4      |
| NDUFAF3      | JAK1       |
| BTNL3        | WDR26      |
| OTOL1        | PHACTR2    |
| SNORD115-11  | TNK1       |
| DDX11L1      | KLF16      |
| PTPN23       | UBE2CBP    |
| LMAN2        | SNORD116-2 |
| FAM194A      | FGD6       |
| SNORD115-12  | CSNK1A1L   |
| TTC34        | HNRNPH1    |
| DNAH1        | SDR42E1    |
| SPINK5       | KCNA2      |
| PPM1L        | TRIM11     |
| SNORD115-13  | BCLAF1     |
| LOC100288069 | TNFSF13    |
| ERC2         | DOT1L      |
| SOX30        | MRAP2      |
| WDR49        | SNORD116-3 |
| SNORD115-14  | NDUFA12    |
| MIR4251      | FAM216B    |
| APPL1        | HRH2       |
| MGAT4B       | PKD1L2     |
| LRRC34       | KCNA3      |
| SNORD115-15  | MIXL1      |
| GNL3         | UST        |
| B4GALT7      | TNFSF12    |
| C3orf55      | KISS1R     |
| SNORD115-16  | RWDD2A     |
| SPCS1        | SNORD116-4 |
| SYNPO        | ANKS1B     |
| C3orf79      | LACC1      |
| SNORD115-17  | HSD17B4    |
| SETD2        | RNF166     |
| RNF44        | KCNA10     |
| SPTSSB       | C1orf124   |
| SNORD115-18  | TRDN       |
| RBM15B       | TM4SF5     |
| ABLIM3       | CREB3L3    |
| DHX36        | KLHL32     |
| SNORD115-19  | SNORD116-5 |
| GMPPB        | CHPT1      |
| HMGXB3       | LINC00330  |
| RPL22L1      | HSPA4      |
| SNORD115-20  | C16orf46   |

|             |            |
|-------------|------------|
| ARHGEF3     | KCNC4      |
| TBC1D9B     | OBSCN      |
| LOC201651   | CITED2     |
| SNORD115-21 | USP6       |
| C3orf18     | LMNB2      |
| ATP10B      | MB21D1     |
| C3orf58     | SNORD116-6 |
| SNORD115-22 | TMCC3      |
| SHISA5      | ST13P4     |
| N4BP3       | HSPA9      |
| NAALADL2    | DNAAF1     |
| SNORD115-23 | KCND3      |
| ZMYND10     | NTPCR      |
| FAF2        | HBS1L      |
| SLC9A9      | RABEP1     |
| SNORD115-25 | RAX2       |
| TEX264      | RIPPLY2    |
| WWC1        | SNORD116-7 |
| IGSF10      | NTN4       |
| SNORD115-26 | DGKH       |
| CCDC72      | NDST1      |
| FBXW11      | SPATA2L    |
| C3orf33     | LEPR       |
| SNORD115-29 | KIAA1804   |
| ZNF589      | PDE10A     |
| LARP1       | KCNAB3     |
| TRIM59      | MUM1       |
| SNORD115-30 | IRAK1BP1   |
| HEMK1       | SNORD116-8 |
| ZNF346      | ACTR6      |
| LOC339894   | CCDC122    |
| SNORD115-31 | HTR4       |
| IP6K2       | C16orf55   |
| GEMIN5      | MOV10      |
| LRRIQ4      | C1orf198   |
| SNORD115-32 | RAB32      |
| SFMBT1      | AURKB      |
| CCDC69      | ATCAY      |
| SAMD7       | B3GAT2     |
| SNORD115-33 | SNORD116-9 |
| NCKIPSD     | NUP37      |
| TSPAN17     | STOML3     |
| AADACL2     | IK         |
| SNORD115-34 | ZC3H18     |
| PHF7        | MSH4       |
| OR4F3       | DISP1      |
| GPR149      | KATNA1     |

|             |             |
|-------------|-------------|
| SNORD115-35 | RPH3AL      |
| TLR9        | MIDN        |
| HAVCR1      | C6orf57     |
| PAQR9       | SNORD116-10 |
| SNORD115-36 | GNPTAB      |
| P4HTM       | FAM194B     |
| CYFIP2      | IL3         |
| PLSCR5      | CDYL2       |
| SNORD115-37 | NFIA        |
| IL17RD      | WNT3A       |
| PRELID1     | FGFR1OP     |
| ANKUB1      | FXR2        |
| SNORD115-38 | R3HDM4      |
| C3orf75     | CD109       |
| IL17B       | SNORD116-11 |
| LEKR1       | ACSS3       |
| SNORD115-39 | SPERT       |
| QRICH1      | IL4         |
| MAT2B       | SLC38A8     |
| TMEM212     | NGF         |
| SNORD115-40 | HIST3H2A    |
| PXK         | SCAF8       |
| MRPL22      | MPDU1       |
| LOC401093   | C19orf6     |
| SNORD115-41 | PM20D2      |
| FEZF2       | SNORD116-12 |
| TLX3        | CEP290      |
| C3orf80     | DLEU7       |
| SNORD115-42 | IL5         |
| DALRD3      | SLC22A31    |
| KCNIP1      | NHLH2       |
| MIR15B      | SNAP47      |
| SNORD115-43 | TAB2        |
| PBRM1       | SPAG7       |
| ZNF354C     | REEP6       |
| MIR16-2     | SRSF12      |
| SNORD115-44 | SNORD116-13 |
| CHDH        | MTERFD3     |
| RPL26L1     | FAM124A     |
| TMEM14E     | IL9         |
| SNORD116-28 | FLJ30679    |
| IL17RB      | NOTCH2      |
| C5orf45     | C1orf96     |
| LOC646168   | SASH1       |
| SNORD116-29 | ACAP1       |
| CACNA2D3    | IZUMO4      |
| DCTN4       | C6orf221    |

|              |             |
|--------------|-------------|
| LOC646903    | SNORD116-14 |
| SNORD115-48  | GLT8D2      |
| DCP1A        | CTAGE10P    |
| DDX41        | IL12B       |
| PA2G4P4      | LOC146513   |
| SNORD115-24  | NRAS        |
| GLT8D1       | DNAH14      |
| NOP16        | SYNE1       |
| LOC647107    | KIAA0753    |
| SNORD115-27  | SCAMP4      |
| SEMA3G       | C6orf165    |
| HMP19        | SNORD116-15 |
| IQCJ         | USP44       |
| SNORD115-28  | SLC25A30    |
| ADAMTS9      | IL13        |
| UIMC1        | ZFPM1       |
| SCARNA7      | ROR1        |
| SNORD115-45  | C1orf131    |
| PCBP4        | HEY2        |
| RAB24        | SGSM2       |
| MIR551B      | ADAT3       |
| SNORD115-47  | PRSS35      |
| ABHD6        | SNORD116-16 |
| NEURL1B      | SLC41A2     |
| MIR569       | SUGT1P3     |
| LOC100128714 | IRF1        |
| LRTM1        | ADAD2       |
| FAM193B      | OVGP1       |
| LOC730091    | EDARADD     |
| HERC2P7      | HEBP2       |
| C3orf14      | CLEC10A     |
| TMED9        | ZNF554      |
| WWTR1-AS1    | LCA5        |
| GOLGA8F      | SNORD116-17 |
| SELK         | LRRIQ1      |
| CDHR2        | SIAH3       |
| LOC100128164 | ITK         |
| GOLGA8DP     | MGC23284    |
| RNF123       | PDE4B       |
| CCDC99       | MRPL55      |
| TIPARP-AS1   | CCDC28A     |
| ULK4P2       | MYBBP1A     |
| KIF9         | GRIN3B      |
| THG1L        | C6orf163    |
| LOC100289361 | SNORD116-18 |
| LOC100288637 | C12orf26    |
| CCDC71       | KCNRG       |

|              |             |
|--------------|-------------|
| GALNT10      | KCNMB1      |
| MIR548H2     | LINC00311   |
| LOC100289656 | PDZK1       |
| NT5DC2       | HIST3H2BB   |
| NHP2         | MTHFD1L     |
| LOC100498859 | PRPF8       |
| MIR4509-1    | MRPL54      |
| SLC26A6      | MMS22L      |
| RBM22        | SNORD116-20 |
| MIR3919      | C12orf23    |
| MIR4509-2    | FREM2       |
| CAMKV        | KCNN2       |
| RNF130       | ZNF778      |
| IQCJ-SCHIP1  | PGM1        |
| MIR4508      | BROX        |
| CCDC51       | MOXD1       |
| NMUR2        | KIF1C       |
| LOC100507389 | ZNF57       |
| MIR4509-3    | DPPA5       |
| THOC7        | SNORD116-21 |
| KIAA1191     | C12orf29    |
| ARHGEF26-AS1 | KCTD4       |
| MIR4715      | LCP2        |
| WDR82        | ACSF3       |
| ERGIC1       | PIN1P1      |
| LOC100507537 | SLC35F3     |
| ID2B         | IPCEF1      |
| CLK4         | GABARAP     |
| MIR4789      | JSRP1       |
| ATRIP        | EYS         |
| ODZ2         | SNORD116-22 |
| NICN1        | DEPDC4      |
| CNOT6        | NHLRC3      |
| MON1A        | LECT2       |
| C5orf54      | LINC00304   |
| ABHD14B      | PRKAB2      |
| NSD1         | B3GALNT2    |
| UCN2         | TIAM2       |
| GMCL1P1      | NLRP1       |
| RFT1         | MOB3A       |
| RMND5B       | GJB7        |
| ACTR8        | SNORD116-23 |
| RANBP17      | CCDC38      |
| GPR62        | SERP2       |
| PCYOX1L      | LMNB1       |
| FAM3D        | SNAI3       |
| CCNJL        | PRKACB      |

|     |           |             |
|-----|-----------|-------------|
|     | IQCF1     | CNIH3       |
|     | SH3TC2    | C6orf123    |
|     | GLYCTK    | ARHGEF15    |
|     | PANK3     | MFSD12      |
|     | PPM1M     | SNHG5       |
|     | SAP30L    | SNORD116-24 |
| ;   | C3orf49   | C12orf45    |
|     | BTNL8     | SERTM1      |
|     | SNTN      | LOX         |
|     | DOK3      | FAM92B      |
| 989 | SYNPR     | PKN2        |
|     | ZFP2      | EXOC8       |
|     | C3orf45   | FBXO5       |
| 331 | RUFY1     | RAP1GAP2    |
|     | ASB14     | GIPC3       |
|     | CPEB4     | C6orf147    |
|     | PRICKLE2  | SNORD116-25 |
| 013 | PRR7      | NEDD1       |
|     | C3orf67   | LINC00547   |
|     | OR4F16    | LTC4S       |
| 814 | KCTD6     | CTU2        |
|     | FBXO38    | PSMA5       |
|     | KLHDC8B   | RNF187      |
|     | TRIM7     | RGS17       |
| 085 | DNAH12    | CAMTA2      |
|     | TIGD6     | PLK5        |
|     | PDE12     | MIR30A      |
| 1   | MXD3      | SNORD115-2  |
|     | FAM116A   | SLC9A7P1    |
|     | THOC3     | LINC00548   |
|     | FBXW12    | SMAD5       |
| 122 | SPINK7    | PABPN1L     |
|     | CCDC66    | PTGER3      |
| !   | TRIM52    | C1orf55     |
|     | FLJ39534  | PDE7B       |
|     | HAVCR2    | KDM6B       |
|     | LOC285401 | CIRBP-AS1   |
|     | AGXT2L2   | MIR30C2     |
| 229 | CCDC36    | SNORD116-26 |
|     | C5orf62   | IKBIP       |
| !   | SPATA12   | MIR15A      |
|     | UNC5A     | MFAP3       |
|     | C3orf62   | LOC400548   |
|     | TRIM41    | PTGFR       |
|     | TMEM110   | C1orf65     |
|     | BOD1      | DLL1        |
|     | AMIGO3    | ZZEF1       |

21

)

5795

;

5619

5810

|           |             |
|-----------|-------------|
| COL23A1   | C19orf25    |
| CDHR4     | OOEP        |
| TIMD4     | SNORD116-27 |
| FAM212A   | SPIC        |
| ZNF300    | MIR16-1     |
| IQCF2     | MGAT1       |
| MYOZ3     | LOC400550   |
| IQCF5     | PTGFRN      |
| UBTD2     | IBA57       |
| MUSTN1    | MRPL18      |
| SCGB3A1   | KIAA0664    |
| IQCF3     | ATP8B3      |
| SFXN1     | MCART3P     |
| MIRLET7G  | SNORD115-3  |
| GPRIN1    | ANO4        |
| MIR135A1  | TSC22D1-AS1 |
| PWWP2A    | MSX2        |
| MIR191    | LOC400558   |
| C1QTNF2   | ABCD3       |
| TMEM89    | LIN9        |
| SCGB3A2   | CLDN20      |
| IQCF6     | SMG6        |
| ZNF354B   | DIRAS1      |
| C3orf78   | TSG1        |
| C5orf47   | SNORD115-4  |
| MIR425    | AMDHD1      |
| PPARGC1B  | TTL         |
| SPINK8    | NDUFA2      |
| C5orf58   | C16orf74    |
| C3orf71   | RABGGTB     |
| OR2Y1     | ZNF678      |
| LOC646498 | NOX3        |
| AFAP1L1   | WSCD1       |
| SNORD19   | ZNF555      |
| GRPEL2    | SNORD50B    |
| SNORD69   | SNORD115-5  |
| LSM11     | TSPAN19     |
| MIR548A2  | SERPINE3    |
| ZNF300P1  | NEUROG1     |
| ESRG      | SNORD68     |
| NUDCD2    | RAP1A       |
| SNORD19B  | PRSS38      |
| UBLCP1    | HDDC2       |
| C3orf74   | CTDNEP1     |
| SLC36A2   | ANKRD24     |
| NRADDP    | KHDC1L      |
| SPINK13   | SNORD115-6  |

865  
F695

11

!

|                |              |
|----------------|--------------|
| BSN-AS2        | LOC144481    |
| C5orf41        | SNORA31      |
| LOC100287879   | NPM1         |
| BTNL9          | LOC727710    |
| MIR1226        | SNORD21      |
| PPP1R2P3       | LOC339535    |
| MIR711         | TFB1M        |
| FAM71B         | C17orf81     |
| MIR4271        | C19orf26     |
| RNF145         | LOC100288198 |
| MIR3938        | SNORD115-7   |
| HIGD2A         | LOC144486    |
| IQCF4          | MIR621       |
| FAM153B        | NPY6R        |
| LOC100506994   | LOC732275    |
| LOC202181      | RPE65        |
| LOC100507062   | IRF2BP2      |
| SLC36A1        | AIG1         |
| ADAMTS9-AS2    | SHPK         |
| EIF4E1B        | CSNK1G2-AS1  |
| ABHD14A-ACY1   | MIR2113      |
| RASGEF1C       | SNORD115-8   |
| TMEM110-MUSTN1 | KRT19P2      |
| LOC257358      | CCDC169      |
| MIR4793        | PCDH1        |
| EFCAB9         | LOC100128881 |
| MIR4787        | RPL5         |
| SH3PXD2B       | MIA3         |
| MIR4443        | SNX9         |
| LOC285593      | AIPL1        |
| LOC100652759   | C19orf77     |
| FAM153A        | MIR548H3     |
| LUST           | SNORD115-9   |
| ARL10          | TMTC2        |
| LOC285626      | TPT1-AS1     |
| LOC285627      | PCDHGC3      |
| LOC285629      | LOC100129617 |
| SLC36A3        | SORT1        |
| KIF4B          | C1orf95      |
| OR2V2          | VT A1        |
| ZNF454         | RNF167       |
| C5orf60        | ADAMTSL5     |
| LOC340037      | MIR4282      |
| ARSI           | SNORD115-10  |
| PFN3           | TMTC3        |
| ZNF879         | MIR548F5     |
| IRGM           | PDE6A        |

|              |              |
|--------------|--------------|
| FBLL1        | LOC100130015 |
| NIPAL4       | SARS         |
| C5orf25      | FAM89A       |
| FLJ38109     | BRP44L       |
| C5orf46      | SENP3        |
| ARHGEF37     | TMPRSS9      |
| SPINK6       | LOC100506804 |
| MIR103A1     | SNORD115-11  |
| MIR143       | C12orf50     |
| MIR145       | MIR320D1     |
| MIR146A      | PDGFRB       |
| MIR218-2     | LOC100287036 |
| SPINK14      | SLC16A1      |
| FNDCC9       | CAPN8        |
| FLJ16171     | HECA         |
| MIR340       | OR1A2        |
| SNORD95      | NDUFS7       |
| SNORD96A     | MIR4464      |
| LOC643201    | SNORD115-12  |
| SPINK9       | ALDH1L2      |
| ZFP62        | MIR4305      |
| CBY3         | PFDN1        |
| FAM153C      | MIR1910      |
| SNORA74B     | STXBP3       |
| MIR585       | C1orf31      |
| MIR143HG     | IL20RA       |
| LOC728554    | SNORA67      |
| AACSP1       | C19orf35     |
| LOC729678    | MIR4643      |
| OR4F29       | SNORD115-13  |
| FAM196B      | SLC5A8       |
| LOC100132062 | MIR3613      |
| LOC100132287 | PGGT1B       |
| LOC100133331 | MIR3182      |
| C5orf52      | SYCP1        |
| LOC100268168 | FAM177B      |
| MIR1229      | UNC93A       |
| MIR103B1     | PELP1        |
| MIR3142      | ONECUT3      |
| MIR3141      | SNORD115-14  |
| MIR4281      | FAM71C       |
| MIR3912      | OR7E37P      |
| LOC100507387 | PITX1        |
| MIR4634      | C16orf95     |
| MIR4638      | TAF13        |
| MIR378E      | ZNF847P      |
| LOC100859930 | MTRF1L       |

RANGRF  
MEX3D  
SNORD115-15  
RMST  
SPG20OS  
POU4F3  
MIR4720  
TBX15  
TRIM67  
AHI1  
TIMM22  
C19orf29-AS1  
SNORD115-16  
C12orf12  
LOC100507240  
PPIC  
MIR4722  
TGFB3  
H3F3AP4  
RMND1  
TAX1BP3  
LINGO3  
SNORD115-17  
SLC17A8  
LOC100509894  
PPP2CA  
TSHB  
DUSP5P  
PHF10  
MINK1  
MIR637  
SNORD115-18  
GNN  
CCDC169-SOHLH2  
PPP2R2B  
USP1  
SNRPD2P2  
VNN3  
GEMIN4  
C19orf71  
SNORD115-19  
TCP11L2  
MIR4703  
MAPK9  
VCAM1  
RPS7P5  
C6orf70

MED31  
LOC100288123  
SNORD115-20  
LOC256021  
LOC100616668  
PROP1  
WNT2B  
SNORA14B  
ECHDC1  
DERL2  
MIR1909  
SNORD115-21  
POC1B  
PURA  
CSDE1  
LOC100130093  
AGPAT4  
GLOD4  
MIR1227  
SNORD115-22  
OTOGL  
RARS  
EVI5  
LOC100130331  
TULP4  
YBX2  
MIR3187  
SNORD115-23  
GAS2L3  
RPS14  
CDC7  
LOC100287814  
HYMAI  
ANKFY1  
MIR4321  
SNORD115-25  
LINC00485  
SGCD  
HIST2H2AA3  
LGALS8-AS1  
GPR126  
INPP5K  
SNORD115-26  
LOC338758  
SKP1  
HIST2H2AC  
MIR1182

KIAA1244  
FAM64A  
SNORD115-29  
C12orf74  
SLC6A7  
HIST2H2BE  
MIR1537  
NHSL1  
XAF1  
SNORD115-30  
PTPRQ  
SLC12A2  
HIST2H4A  
LINC00184  
PLEKHG1  
C17orf59  
SNORD115-31  
C12orf42  
SLC34A1  
BCAR3  
TSNAX-DISC1  
ARID1B  
GPR172B  
SNORD115-32  
C12orf75  
SLC22A4  
TTF2  
MIR320B2  
TMEM181  
WRAP53  
SNORD115-33  
MKRN9P  
SLC22A5  
ITGA10  
MIR3620  
ZBTB2  
RNMTL1  
SNORD115-34  
MIR135A2  
SLIT3  
LMO4  
LOC100506795  
C6orf115  
VPS53  
SNORD115-35  
C12orf37  
SNCB

:

CDC14A  
LOC100506810  
PBOV1  
C17orf85  
SNORD115-36  
PLEKHG7  
SNX2  
RTCD1  
MIR4753  
TRMT11  
TSR1  
SNORD115-37  
NUDT4P1  
SPARC  
FPGT  
MIR4666A  
PERP  
DHX33  
SNORD115-38  
MIR331  
SPINK1  
PEX11B  
MIR4671  
SMOC2  
PLSCR3  
SNORD115-39  
EID3  
SPOCK1  
FUBP1  
MIR4427  
ALDH8A1  
NLGN2  
SNORD115-40  
CLU10S  
STK10  
BCL10  
MIR4742  
ULBP3  
ZBTB4  
SNORD115-41  
CLU1  
TAF7  
DIRAS3  
OR2A4  
CXCL16  
SNORD115-42  
MIR492

;

;

v34

;

;

;

TCF7  
SLC16A4  
C6orf211  
TRAPPC1  
SNORD115-43  
LOC643339  
ZNF354A  
SRSF11  
ZDHHC14  
ALOXE3  
SNORD115-44  
LOC643770  
TCOF1  
CD101  
ADGB  
SRR  
SNORD116-28  
SNORA53  
TGFB1  
SEPT15  
FRMD1  
NXN  
SNORD116-29  
MIR617  
TTC1  
ZRANB2  
AGPAT4-IT1  
MIS12  
SNORD115-48  
MIR618  
UBE2B  
ARHGAP29  
C6orf208  
METTL16  
SNORD115-24  
LOC728084  
UBE2D2  
SEC22B  
C6orf97  
PHF23  
SNORD115-27  
C12orf73  
VDAC1  
CHD1L  
MYCT1  
FAM57A  
SNORD115-28

1

;

)

161

LOC100128191  
WNT8A  
CLCA3P  
ULBP2  
CTC1  
SNORD115-45  
LOC100287944  
NME5  
CLCA2  
ULBP1  
NDEL1  
SNORD115-47  
MIR1252  
PDLIM4  
HS2ST1  
LPAL2  
PITPNM3  
LOC100128714  
MIR1827  
STC2  
PDE4DIP  
PPP1R14C  
TMEM93  
GOLGA8F  
MIR1251  
EIF4EBP3  
DNAJC6  
RNF146  
RILP  
ULK4P2  
MIR4303  
PCDHGB4  
LRIG2  
SF3B5  
TEKT1  
LOC100288615  
MIR3685  
CDC23  
LPPR4  
TAAR8  
GSG2  
LOC100288637  
MIR3652  
ADAM19  
SV2A  
RSPH3  
ZMYND15

LOC100289656  
MIR3922  
FGF18  
RBM8A  
TTLL2  
CAMKK1  
MIR1233-1  
LOC100505978  
HDAC3  
INSL5  
FBXO30  
RPAIN  
MIR1233-2  
POC1B-GALNT4  
SQSTM1  
PIGK  
L3MBTL3  
TMEM107  
MIR3942  
MIR4699  
P4HA2  
TSPAN2  
FAM120B  
LSMD1  
LOC100507466  
MIR548AL  
ATP6V0E1  
INADL  
FNDC1  
NEURL4  
MIR4509-1  
ATG12  
SF3B4  
RSPO3  
ZNF594  
MIR4509-2  
PTTG1  
BCAS2  
LRP11  
HES7  
MIR4510  
PDLIM7  
WARS2  
LTV1  
SPATA22  
MIR4509-3  
CNOT8

CEPT1  
SERAC1  
TXNDC17  
MIR4715  
HAND1  
PIAS3  
REPS1  
MIR22HG  
TMCO5B  
MED7  
VAV3  
PPIL4  
TMEM88  
MYOT  
HBXIP  
LINC00473  
SAT2  
ADAMTS2  
IFI44  
ARHGAP18  
SMYD4  
NRG2  
POLR3C  
SYTL3  
CNTROB  
CXCL14  
TXNIP  
FAM54A  
RPL29P2  
H2AFY  
AP4B1  
SFT2D1  
CYB5D1  
SMAD5-AS1  
PHTF1  
TMEM200A  
OVCA2  
RNF14  
AHCYL1  
C6orf72  
KRBA2  
SNCAIP  
WDR3  
IL22RA2  
SLC43A2  
CLINT1  
MAN1A2

}

;

1581

.347

;

C6orf192  
CYB5D2  
PCDHGA8  
IFI44L  
TAGAP  
C17orf49  
PCDHA9  
DNAJB4  
ADAT2  
ZFP3  
MATR3  
ADAM30  
CLVS2  
GGT6  
MAML1  
CD160  
TAAR9  
SPNS2  
KIAA0141  
GLMN  
TAAR1  
WDR81  
JAKMIP2  
HLA3  
STXBP5  
DNAH2  
DDX46  
DDX20  
NCOA7  
RTN4RL1  
GFPT2  
CLCA4  
HINT3  
ODF4  
SLC23A1  
MTF2  
PACRG  
KCTD11  
GNPDA1  
NTNG1  
RAET1E  
TRPV3  
SRA1  
WDR47  
LOC153910  
SLC16A11  
RAD50

|      |                                                                                                                                                                                                                                                                                                                                                                                                                                                                                                   |
|------|---------------------------------------------------------------------------------------------------------------------------------------------------------------------------------------------------------------------------------------------------------------------------------------------------------------------------------------------------------------------------------------------------------------------------------------------------------------------------------------------------|
| 1938 | USP33<br>ZC2HC1B<br>FBXO39<br>KIF20A<br>CLCC1<br>CNKSR3<br>SLC16A13<br>G3BP1<br>SLC35D1<br>RAET1L<br>C17orf74<br>APBB3<br>LPHN2<br>SAMD3<br>SPNS3<br>TNIP1<br>KIAA1107<br>MGC34034<br>C17orf61<br>GNB2L1<br>ITGB3BP<br>SLC2A12<br>BCL6B<br>SLU7<br>SLC35A3<br>LOC154092<br>LOC284009<br>RGS14<br>LRRC8B<br>PNLDC1<br>VMO1<br>SEC24A<br>LPAR3<br>RNF217<br>LOC284023<br>CPLX2<br>DDAH1<br>NKAIN2<br>LINC00324<br>C5orf4<br>NBPf14<br>LOC154449<br>SLC13A5<br>FAM114A2<br>RWDD3<br>OLIG3<br>TMEM102 |
| 1576 |                                                                                                                                                                                                                                                                                                                                                                                                                                                                                                   |
| 1782 |                                                                                                                                                                                                                                                                                                                                                                                                                                                                                                   |
| FFL  |                                                                                                                                                                                                                                                                                                                                                                                                                                                                                                   |
| ,    |                                                                                                                                                                                                                                                                                                                                                                                                                                                                                                   |

;

;

;

1

)

.

BRD8  
ZZZ3  
TXLNB  
TUSC5  
TCERG1  
SERBP1  
DACT2  
LOC339166  
BTNL3  
PTPN22  
C6orf118  
TMEM95  
HNRNPA0  
PHGDH  
OSTCP1  
SMTNL2  
LMAN2  
AK5  
C6orf191  
ALOX15P1  
SPINK5  
SNORA66  
WDR27  
FAM101B  
SOX30  
SNORD45B  
SHPRH  
SPEM1  
KIF3A  
SNORD45A  
LINC00326  
GLTPD2  
MGAT4B  
FOXD3  
LOC285740  
INCA1  
B4GALT7  
CHIA  
LOC285796  
SCIMP  
SYNPO  
RNF115  
PRR18  
C17orf100  
RNF44  
ANGPTL3  
TAAR6

OR3A4P  
ABLIM3  
GPSM2  
SLC35D3  
SLC25A35  
HMGXB3  
ALG6  
ZC3H12D  
C17orf97  
TBC1D9B  
SLC25A24  
ECT2L  
MED11  
ARHGAP26  
DNTTIP2  
NUP43  
MIR132  
FSTL4  
TMED5  
C6orf58  
MIR195  
ATP10B  
BOLA1  
RAET1G  
MIR212  
N4BP3  
TNNI3K  
HMGA1P7  
MIR22  
SEPT8  
SH3GLB1  
SUMO4  
TNFSF12-TNFSF13  
FAF2  
HAO2  
CENPW  
RNASEK  
WWC1  
ACP6  
C6orf174  
MIR324  
FBXW11  
HOOK1  
C6orf120  
MIR497  
ACSL6  
SNX7

THEMIS  
SLC35G6  
PHF15  
GPR89B  
SAMD5  
RNF222  
LARP1  
TRIM33  
IYD  
SNORA48  
HARS2  
DPH5  
DKFZp451B082  
SNORD10  
ZNF346  
GPR88  
TCP10L2  
OR1D4  
TNFAIP8  
CCDC76  
LINC00242  
SCARNA21  
GEMIN5  
L1TD1  
GTF2H5  
SNORD91A  
PCDHGA12  
RSBN1  
FLJ46906  
SNORD91B  
LRRTM2  
ZNHIT6  
LOC441177  
BHLHA9  
CCDC69  
LEPROT  
SNORD101  
TLCD2  
PCDHB5  
GIPC2  
SNORD100  
LOC728392  
FBXL21  
GDAP2  
SNORA33  
LOC100128288  
KLHL3

|      |                 |
|------|-----------------|
|      | FAM46C          |
|      | LOC643623       |
|      | C17orf107       |
|      | TSPAN17         |
|      | PALMD           |
|      | CTAGE9          |
|      | LOC100130950    |
|      | OR4F3           |
| 0676 | FNBP1L          |
|      | LOC645434       |
|      | DBIL5P          |
|      | HAVCR1          |
| 0556 | ST7L            |
|      | RAET1K          |
|      | MIR1253         |
|      | SNORD63         |
| 0550 | PRPF38B         |
|      | MLLT4-AS1       |
| 1    | LOC100306951    |
|      | SNORA74A        |
|      | LRRC8D          |
|      | SNORA20         |
| 0879 | MIR3183         |
|      | CYFIP2          |
|      | PRMT6           |
|      | SNORA29         |
|      | MIR4314         |
|      | PKD2L2          |
|      | RAVER2          |
|      | LOC729176       |
|      | MIR3676         |
|      | UQCRQ           |
|      | FGGY            |
|      | LOC729178       |
| 0640 | LOC100506388    |
|      | AFF4            |
|      | MCOLN3          |
|      | TMEM242         |
|      | LOC100506713    |
|      | PRELID1         |
|      | SLC22A15        |
|      | LOC729603       |
|      | MIR497HG        |
|      | IL17B           |
|      | RNPC3           |
|      | HGC6.3          |
|      | RNASEK-C17ORF49 |

|        |                 |
|--------|-----------------|
|        | MAT2B           |
|        | LRRC40          |
|        | LOC100128176    |
|        | C17orf61-PLSCR3 |
|        | SLC27A6         |
|        | DEPDC1          |
|        | LOC100129518    |
|        | SENK3-EIF4A1    |
|        | SNX24           |
| 994    | LRIF1           |
|        | C6orf99         |
| 032    | P2RX5-TAX1BP3   |
|        | MRPL22          |
| 062    | CTTNBP2NL       |
|        | LINC00271       |
| AS2    | MIR4520A        |
|        | PCDHB1          |
| ACY1   | FAM212B         |
|        | LOC100132735    |
| MUSTN1 | MIR4521         |
|        | TLX3            |
| ;      | GNG12           |
|        | LOC100289495    |
|        | MIR4520B        |
|        | KCNIP1          |
|        | CCBL2           |
|        | NHEG1           |
|        | ZNF354C         |
|        | TMEM167B        |
|        | MIR1913         |
|        | TMED7           |
|        | OLFML3          |
|        | MIR3145         |
| 759    | ISOC1           |
|        | FAM91A2         |
|        | MIR3918         |
|        | RPL26L1         |
|        | AMIGO1          |
|        | MIR3939         |
|        | SAR1B           |
|        | ODF2L           |
|        | MIR3668         |
|        | C5orf45         |
|        | KIAA1324        |
|        | MIR3662         |
|        | DCTN4           |
|        | LRRC7           |

MIR3692  
MZB1  
CACHD1  
LOC100507203  
PAIP2  
MIER1  
LOC100507254  
CDKL3  
PTBP2  
LOC100507462  
PCDH12  
DNASE2B  
LOC100507489  
FAM13B  
ELTD1  
LOC100507557  
FAM53C  
HIAT1  
CAHM  
REEP2  
RBM15  
MIR4466  
PRR16  
DCLRE1B  
MIR4465  
COMMD10  
WDR77  
MIR4644  
DDX41  
DLEU2L  
LOC100652739  
NOP16  
EPS8L3  
LARS  
VTCN1  
CXXC5  
TTLL7  
HMP19  
WDR78  
UIMC1  
RPAP2  
RAPGEF6  
DENND2D  
KDM3B  
WLS  
PHAX  
RPF1

RAB24  
SIKE1  
RBM27  
TRIM45  
NEURL1B  
ANKRD13C  
FAM193B  
VANG1  
PCDHB18  
ST6GALNAC5  
PCDHB17  
GPR61  
TMED9  
TM2D1  
ZCCHC10  
REG4  
CDHR2  
SYDE2  
WDR55  
ZNF644  
ANKHD1  
LRRC8C  
CCDC99  
SGIP1  
THG1L  
POLR3GL  
TMC06  
PROK1  
TRIM36  
EFCAB7  
GALNT10  
PSRC1  
NHP2  
ATP1A1OS  
RBM22  
ATG4C  
RNF130  
FAM40A  
PCDHGC5  
DOCK7  
PCDHGC4  
ZNF697  
PCDHGB7  
NEXN  
PCDHGB6  
DNAJA1P5  
PCDHGB5

VL

HENMT1  
PCDHGB3  
GNRHR2  
PCDHGB2  
GBP4  
PCDHGB1  
GBP5  
PCDHGA11  
SSX2IP  
PCDHGA10  
OLFM3  
PCDHGA9  
WDR63  
PCDHGA7  
MAB21L3  
PCDHGA6  
HIST2H3C  
PCDHGA5  
SLC44A3  
PCDHGA4  
ATXN7L2  
PCDHGA3  
C1orf194  
PCDHGA2  
ASB17  
PCDHGA1  
TYW3  
PCDHGB8P  
C1orf173  
PCDHB15  
LRRIQ3  
PCDHB14  
LRRC39  
PCDHB13  
C1orf87  
PCDHB12  
LIX1L  
PCDHB11  
HSD3BP4  
PCDHB10  
DRAM2  
PCDHB9  
C1orf88  
PCDHB8  
C1orf162  
PCDHB7  
SYT6

AS1

PCDHB6  
SAMD13  
PCDHB4  
C1orf52  
PCDHB3  
TMEM56  
PCDHB2  
NBPF4  
PCDHAC2  
UBE2U  
PCDHAC1  
HFE2  
PCDHA13  
ANKRD35  
PCDHA12  
SLC30A7  
PCDHA11  
MGC27382  
PCDHA10  
IL23R  
PCDHA8  
RP11-165H20.1  
PCDHA7  
DENND2C  
PCDHA6  
GBP6  
PCDHA5  
LPPR5  
PCDHA4  
FNDC7  
PCDHA3  
KANK4  
PCDHA2  
SASS6  
PCDHA1  
PPIAL4A  
VTRNA1-3  
HFM1  
VTRNA1-2  
UBL4B  
VTRNA1-1  
PDIA3P  
NMUR2  
ALG14  
FEM1C  
LINC00466  
C5orf15

|   |            |
|---|------------|
| A | NBPF11     |
|   | CDC42SE2   |
| 3 | NUDT17     |
|   | TRPC7      |
| ) | TCTEX1D1   |
|   | KIAA1191   |
|   | SPAG17     |
|   | ERGIC1     |
|   | HIPK1      |
|   | CLK4       |
|   | SLC44A5    |
|   | ODZ2       |
|   | AKR7A2P1   |
|   | CNOT6      |
|   | EPHX4      |
|   | ZNF608     |
|   | AKNAD1     |
|   | KCTD16     |
|   | MCOLN2     |
|   | SEMA6A     |
|   | COL24A1    |
|   | PCDHB16    |
|   | ST6GALNAC3 |
|   | HMHB1      |
|   | NEGR1      |
|   | C5orf54    |
|   | MAGI3      |
|   | NSD1       |
|   | FAM19A3    |
|   | SIL1       |
|   | NBPF15     |
|   | GMCL1P1    |
|   | FAM102B    |
|   | ARAP3      |
|   | SYPL2      |
|   | RMND5B     |
|   | CYB561D1   |
|   | YTHDC2     |
|   | ANKRD34A   |
|   | RANBP17    |
|   | ZNF326     |
|   | GRAMD3     |
|   | BTBD8      |
| } | PCYOX1L    |
| ; | HIST2H2AB  |
|   | CCNJL      |
|   | PPM1J      |

}

SH3TC2  
HIST2H3A  
PANK3  
HIST2H2BC  
SAP30L  
HIST2H2BA  
TXNDC15  
LOC339524  
BTNL8  
CCDC18  
DOK3  
MYBPHL  
ZFP2  
BARHL2  
RUFY1  
HSP90B3P  
CPEB4  
NBP7  
PRR7  
FAM73A  
NDFIP1  
LOC375010  
OR4F16  
GBP7  
FBXO38  
C1orf146  
YIPF5  
FAM69A  
TRIM7  
SLC6A17  
TIGD6  
NOTCH2NL  
SPRY4  
FLJ39739  
MXD3  
LOC388692  
SLC4A9  
UOX  
SLC25A2  
FRRS1  
PCDHB19P  
C1orf141  
PCBD2  
GBP1P1  
PSD2  
FLJ27354  
THOC3

}

,

}

,

}

}

!

F4EBP3

;

;

.

)

;

)

MIR137HG  
C5orf32  
NBPF9  
MEGF10  
MIR101-1  
SPINK7  
MIR137  
TRIM52  
MIR186  
HAVCR2  
MIR197  
AGXT2L2  
LHX8  
C5orf62  
C1orf180  
FCHSD1  
FLJ31662  
UNC5A  
LOC440600  
LYRM7  
BCL2L15  
TRIM41  
HIST2H2BF  
BOD1  
PGCP1  
CDKN2AIPNL  
GEMIN8P4  
COL23A1  
RBMXL1  
TIMD4  
HIST2H4B  
ZNF300  
SRG7  
MYOZ3  
CYMP  
UBTD2  
LOC643441  
SCGB3A1  
LOC644242  
PRDM6  
PPIAL4G  
FTMT  
PPIAL4D  
SFXN1  
LOC645166  
FNIP1  
LOC646626

|      |            |
|------|------------|
|      | SLC35A4    |
|      | EMBP1      |
|      | GPRIN1     |
|      | SRGAP2P2   |
|      | PWWP2A     |
|      | LOC648740  |
|      | C1QTNF2    |
|      | NBPF6      |
|      | MARCH3     |
|      | PPIAL4B    |
|      | LEAP2      |
|      | LOC653513  |
|      | SCGB3A2    |
| !    | GPR89A     |
|      | ZNF354B    |
| !    | PPIAL4C    |
| !    | C5orf47    |
| )    | HIST2H3D   |
|      | PPARGC1B   |
| !    | FAM72B     |
|      | PRRC1      |
|      | SCARNA2    |
|      | C5orf58    |
|      | SNORD45C   |
|      | ZNF474     |
| !716 | MIR548D1   |
|      | OR2Y1      |
| .067 | MIR553     |
|      | AFAP1L1    |
| !062 | HIST2H2AA4 |
| !287 | GRPEL2     |
|      | FAM72D     |
| !050 | LSM11      |
| !331 | LOC728855  |
| !939 | GPR151     |
|      | LOC728875  |
| !168 | ZNF300P1   |
| !216 | NBPF24     |
| !230 | NUDCD2     |
| !673 | GPR89C     |
|      | UBLCP1     |
|      | NBPF16     |
|      | SOWAHA     |
|      | PDZK1P1    |
| AM2  | SHROOM1    |
|      | PPIAL4F    |
| !749 | C5orf24    |

|      |  |              |
|------|--|--------------|
|      |  | LOC728989    |
|      |  | C5orf20      |
|      |  | LOC729970    |
|      |  | SLC36A2      |
|      |  | LOC729987    |
|      |  | SPINK13      |
|      |  | PPIAL4E      |
|      |  | C5orf41      |
|      |  | PFN1P2       |
|      |  | CEP120       |
|      |  | MIR942       |
|      |  | SLC25A48     |
|      |  | MIR760       |
|      |  | SRFBP1       |
|      |  | LOC100128787 |
| i658 |  | LOC153469    |
| i678 |  | LOC100129046 |
| i841 |  | ZMAT2        |
| i894 |  | LOC100129138 |
|      |  | BTNL9        |
| '387 |  | LOC100129269 |
|      |  | CCDC112      |
|      |  | LOC100129620 |
|      |  | PPP1R2P3     |
|      |  | LOC100130000 |
|      |  | FAM71B       |
|      |  | LOC100131564 |
|      |  | PRELID2      |
|      |  | NBPF10       |
|      |  | SH3RF2       |
| i930 |  | FCGR1C       |
|      |  | PLAC8L1      |
|      |  | ZRANB2-AS1   |
|      |  | RNF145       |
|      |  | LOC100286793 |
|      |  | ADAMTS19     |
|      |  | LOC100287722 |
|      |  | HIGD2A       |
|      |  | LOC100289178 |
|      |  | SPATA24      |
|      |  | LOC100289211 |
|      |  | DNAJC18      |
|      |  | MIR320B1     |
|      |  | FAM153B      |
|      |  | MIR1262      |
|      |  | LOC202181    |
|      |  | MIR3117      |

STK32A  
MIR4256  
AQPEP  
MIR3671  
SLC36A1  
MIR548AA1  
EIF4E1B  
LOC100505768  
RASGEF1C  
LOC100506343  
LOC257358  
FPGT-TNNI3K  
EFCAB9  
TMEM56-RWDD3  
SH3PXD2B  
MIR4794  
LOC285593  
MIR4711  
FAM153A  
MIR2682  
ARL10  
MIR4423  
DTWD2  
NEGR1-IT1  
RELL2  
ZRANB2-AS2  
LOC285626  
LOC285627  
LOC285629  
SLC36A3  
KIF4B  
OR2V2  
ZNF454  
C5orf60  
CHSY3  
LOC340037  
TMEM173  
FAM170A  
LOC340073  
LOC340074  
ARSI  
PFN3  
ZNF879  
IRGM  
FBLL1  
CATSPER3  
NIPAL4

TICAM2  
DND1  
C5orf25  
FLJ38109  
C5orf48  
LOC389332  
C5orf65  
C5orf46  
ARHGEF37  
C5orf63  
SPINK6  
ANKHD1-EIF4EBP3  
MIR103A1  
MIR143  
MIR145  
MIR146A  
MIR218-2  
SPINK14  
FNDC9  
C5orf56  
FLJ16171  
MIR340  
IGIP  
TIFAB  
LOC553103  
CTXN3  
SNORD95  
SNORD96A  
ECSCR  
LOC643201  
GRXCR2  
SPINK9  
ZFP62  
LOC644100  
FLJ33630  
CCNI2  
CBY3  
FAM153C  
SNORA74B  
MIR585  
SNHG4  
MIR143HG  
LOC728342  
LOC728554  
LOC729080  
AACSP1  
LOC729678

OR4F29  
VTRNA2-1  
MIR874  
FAM196B  
LOC100132062  
LOC100132287  
LOC100133331  
C5orf52  
LOC100268168  
MIR1289-2  
MIR1229  
MIR103B1  
MIR1244-1  
TMED7-TICAM2  
MIR1244-3  
MIR1244-2  
MIR3142  
MIR3141  
MIR4281  
MIR3655  
MIR3912  
MIR3936  
MIR3661  
LOC100505658  
LOC100505841  
LOC100507387  
MIR4633  
MIR4634  
MIR4461  
MIR4460  
MIR4638  
MIR378E  
LOC100859930



















































| ype B        |
|--------------|
| Del          |
| CDKN2A       |
| PTEN         |
| PVRL1        |
| LINC00290    |
| AGXT         |
| hsa-mir-760  |
| RPL22        |
| hsa-mir-582  |
| ZMYND11      |
| hsa-mir-378  |
| hsa-mir-202  |
| PARK2        |
| LSAMP-AS3    |
| SPRED1       |
| RBFOX1       |
| FMN1         |
| B2M          |
| hsa-mir-3187 |
| PTPRD        |
| hsa-mir-1267 |
| FBXO25       |
| hsa-mir-1910 |
| hsa-mir-605  |
| hsa-mir-887  |
| GPHN         |
| hsa-mir-203  |
| WWOX         |
| NAALADL2     |
| hsa-mir-943  |
| hsa-mir-3201 |
| PHF2P1       |
| GOLGA3       |
| hsa-mir-3181 |
| hsa-mir-3135 |
| hsa-mir-3183 |
| hsa-mir-148b |
| hsa-mir-587  |
| hsa-mir-3185 |
| C9orf53      |
| KLLN         |
| KIF1A        |
| ABCA4        |
| KCNAB2       |

PDE4D  
TUBB8  
hsa-mir-145  
ADAM8  
EIF3J  
ATP5D  
C9orf123  
ATP4B  
C8orf42  
AFG3L1P  
PRKG1  
hsa-mir-4278  
hsa-mir-4309  
MIR4789  
hsa-mir-571  
hsa-let-7b  
ANKRD20A9P  
POLE  
hsa-mir-1826  
hsa-mir-563  
ABR  
hsa-mir-615  
hsa-mir-2113  
hsa-mir-196a-1  
GPR35  
BRDT  
ACOT7  
PART1  
hsa-mir-584  
UTF1  
CTDSPL2  
AZU1  
COL4A1  
ERICH1  
APRT  
CSTF2T  
hsa-mir-4277  
hsa-mir-1247  
ADD1  
hsa-mir-1249  
LINC00442  
PXMP2  
ADCY7  
hsa-mir-3134  
DOC2B  
hsa-mir-196a-2  
AIM1

hsa-mir-10a  
C2orf54  
CNN3  
ICMT  
ADRB2  
VENTX  
SPG11  
HCN2  
COL4A2  
ZNF596  
C16orf3  
MIR605  
ADCY2  
hsa-mir-656  
ADRA2C  
ACR  
ZNF10  
CBLN1  
hsa-mir-4270  
RPH3AL  
hsa-mir-1293  
AMD1  
hsa-mir-1203  
LOC200772  
DR1  
CHD5  
ANXA6  
KNDC1  
PATL2  
BSG  
EFNB2  
LOC286083  
CA5A  
CTNND2  
hsa-mir-370  
ATP5I  
ARSA  
ZNF26  
CYLD  
hsa-mir-885  
TIMM22  
hsa-mir-1291  
PRDM1  
hsa-mir-152  
AQP12A  
F3  
HES2

ATOX1  
MIR202  
LOC645212  
CDC34  
F7  
OR4F21  
CBFA2T3  
DAP  
hsa-mir-345  
CRMP1  
CHKB  
ZNF84  
MMP2  
ATP2B2  
GEMIN4  
ACCN2  
CCNC  
hsa-mir-4315-1  
AQP12B  
GBP2  
NPHP4  
CAMK2A  
CIRBP  
F10  
RPL23AP53  
CDH15  
DNAH5  
hsa-mir-342  
CTBP1  
CPT1B  
ZNF140  
PHKB  
BTD  
GLOD4  
ACVR1B  
COL10A1  
hsa-mir-2117  
GFI1  
GPR153  
CD14  
CNN2  
GAS6  
COX4I1  
MTRR  
hsa-mir-3173  
DGKQ  
TYMP

ZNF268  
RBL2  
CAV3  
RNMTL1  
ACVRL1  
EPA7  
hsa-mir-2909  
GCLM  
RNF207  
CD74  
CFD  
ING1  
CYBA  
MYO10  
SERPINA3  
EVC  
FBLN1  
P2RX2  
SALL1  
DAZL  
VPS53  
ADCY6  
FOXO3  
hsa-mir-632  
ABCD3  
HES3  
CDX1  
ARID3A  
LAMP1  
DPEP1  
NDUFS6  
AKT1  
FGFR3  
PPARA  
ANKLE2  
SIAH1  
FANCD2  
NXN  
ABCD2  
FRK  
hsa-mir-365-2  
SNORD21  
MIR4689  
CSF1R  
EFNA2  
LIG4  
FANCA

SDHA  
BDKRB1  
GAK  
MAPK11  
CHFR  
N4BP1  
FBLN2  
FAM57A  
AMHR2  
FYN  
hsa-mir-3184  
RPL5  
MIR4417  
CSNK1A1  
ELANE  
GRK1  
FOXF1  
SLC6A3  
BDKRB2  
GRK4  
MAPK12  
FBRSL1  
IRX5  
GRM7  
FAM101B  
AQP2  
GPR6  
hsa-mir-144  
TGFB3  
CTNNA1  
GPX4  
SOX1  
FOXL1  
SLC9A3  
CALM1  
HTT  
SBF1  
PGAM5  
DNAJA2  
HRH1  
C17orf97  
AQP5  
GRIK2  
ACACA  
EVI5  
DIAPH1  
GZMM

TFDP1  
FOXC2  
SRD5A1  
SERPINA6  
HGFAC  
UPK3A  
LOC647589  
ZNF267  
IL5RA  
BHLHA9  
AQP6  
HDAC2  
ACCN1  
CDC7  
DPYSL3  
PALM  
CUL4A  
GALNS  
TERT  
FOXN3  
IDUA  
WNT7B  
ZNF605  
ZNF423  
IRAK2  
DBIL5P  
ARF3  
KPNA5  
ACLY  
BCAR3  
SLC26A2  
POLR2E  
IRS2  
GAS8  
TRIO  
CHGA  
LETM1  
CELSR1  
LOC100507055  
RPGRIP1L  
ITPR1  
MIR3183  
ATF1  
LAMA4  
AP2B1  
ARHGAP29  
HBEGF

POLRMT  
PROZ  
HSBP1  
SEMA5A  
CKB  
LRPAP1  
PPP6R2  
ORC6  
OGG1  
LOC100506388  
ATP5G2  
MARCKS  
ALDOC  
GLMN  
FAT2  
PRTN3  
ARHGEF7  
IRF8  
TRIP13  
CRIP1  
MSX1  
ZBED4  
TP53TG3  
OXTR  
CACNB3  
POU3F2  
AOC2  
MTF2  
FGF1  
PTBP1  
CDC16  
MC1R  
PDCD6  
CRIP2  
MYL5  
SCO2  
TOX3  
PPARG  
CCNT1  
PREP  
ARL4D  
KIAA1107  
GLRA1  
STK11  
TUBGCP3  
MVD  
MARCH6

DIO2  
PDE6B  
PKDREJ  
BRD7  
RAB5A  
CNTN1  
REV3L  
ATP5G1  
LRRC8B  
GM2A  
MADCAM1  
TNFSF13B  
CHMP1A  
BASP1  
DIO3  
RGS12  
NUP50  
HEATR3  
RAF1  
COL2A1  
ROS1  
ATP6V0A1  
RWDD3  
GPX3  
MED16  
RASA3  
RPL13  
SLC12A7  
DYNC1H1  
RNF4  
RABL2B  
VPS35  
RPL32  
EIF4B  
SIM1  
BLMH  
SNORA66  
NR3C1  
FSTL3  
MYO16  
SPG7  
PAPD7  
EIF5  
SH3BP2  
GRAMD4  
NOD2  
SATB1

CELA1  
SMPD2  
BRCA1  
DNTTIP2  
HARS  
ABCA7  
ATP11A  
SLC7A5  
TPPP  
ELK2AP  
WFS1  
MLC1  
PAPD5  
SEC13  
GPD1  
MAP3K7  
FMNL1  
TMED5  
NDST1  
SBNO2  
MCF2L  
CDK10  
EXOC3  
EML1  
WHSC1  
KIAA0930  
AKTIP  
SETMAR  
NCKAP1L  
NR2E1  
CACNB1  
FNBP1L  
HTR4  
HMHA1  
TMCO3  
MBTPS1  
CCT5  
GALC  
WHSC2  
MAPK8IP2  
FTO  
SLC6A1  
NR4A1  
TSPYL1  
CDC6  
LRRC8D  
IK

FGF22  
ARGLU1  
TAF1C  
FBXL7  
GTF2A1  
ZNF141  
PLXNB2  
IRX6  
SLC6A6  
HNRNPA1  
DDO  
CDC27  
RPAP2  
NDUFA2  
C19orf24  
DCUN1D2  
USP10  
KIAA0947  
BRF1  
SLBP  
BRD1  
IRX3  
SLC6A11  
HOXC4  
SNX3  
CCR7  
ZNF644  
PCDH1  
RNF126  
ANKRD10  
C16orf7  
PP7080  
HSP90AA1  
NOP14  
ARHGAP8  
SHCBP1  
SYN2  
HOXC5  
CD164  
CNP  
LRRC8C  
PCDHGC3  
WDR18  
RAB20  
KIAA0513  
IRX4  
IFI27

FAM193A  
TBC1D22A  
CHD9  
TIMP4  
HOXC6  
WISP3  
CPD  
GBP4  
PDE6A  
LPPR3  
CARKD  
PIEZO1  
TAS2R1  
ITPK1  
C4orf6  
ATXN10  
ITFG1  
NR2C2  
HOXC8  
WASF1  
CRHR1  
GBP5  
PDGFRB  
KISS1R  
PCID2  
ATP2C2  
FAM134B  
JAG2  
MFSD10  
FAM19A5  
NETO2  
UBE2E2  
HOXC9  
FHL5  
CRYBA1  
SLC44A3  
PFDN1  
MIDN  
UPF3A  
COX4NB  
FAM105A  
KLC1  
MAEA  
RIBC2  
LONP2  
VHL  
HOXC10

ATG5  
CSF3  
TMEM56  
POU4F3  
R3HDM4  
CARS2  
TUBB3  
NSUN2  
MARK3  
PCGF3  
SMC1B  
CAPNS2  
WNT7A  
HOXC11  
ZBTB24  
DHX8  
GBP6  
PPP2R2B  
C19orf6  
GRTP1  
PRDM7  
CEP72  
ATXN3  
SPON2  
NCAPH2  
GPT2  
XPC  
HOXC12  
FIG4  
DUSP3  
HFM1  
PURA  
TPGS1  
ABHD13  
TCF25  
ANKH  
NDUFB1  
TACC3  
GTSE1  
ABCC11  
BRPF1  
HOXC13  
CASP8AP2  
ERBB2  
ALG14  
RPS14  
GRIN3B

ADPRHL1  
ZCCHC14  
AHRR  
SERPINA5  
MXD4  
MOV10L1  
NKD1  
COLQ  
IGFBP6  
FUT9  
ETV4  
EPHX4  
SLC6A7  
C19orf21  
TEX29  
KIAA0182  
MRPL36  
SERPINA1  
CPLX1  
FAM118A  
MYLK3  
CAMK1  
ITGA5  
TRAF3IP2  
EVI2A  
ZNF326  
SPARC  
CIRBP-AS1  
SPACA7  
COTL1  
BRD9  
SERPINA4  
SLC26A1  
TTC38  
ABCC12  
BHLHE40  
ITGB7  
ASCC3  
EVI2B  
BTBD8  
SPINK1  
C19orf26  
DAOA  
MLYCD  
FASTKD3  
PPP2R5C  
D4S234E

C22orf26  
C16orf78  
KAT2B  
KRT1  
BVES  
EZH1  
CCDC18  
TAF7  
ODF3L2  
DAOA-AS1  
CPNE7  
IRX1  
LGMM  
STX18  
MIOX  
ANKRD26P1  
SH3BP5  
KRT2  
SEC63  
FLOT2  
BARHL2  
TCOF1  
PRSS57  
LINC00346  
IL17C  
ZDHC11  
PSMC1  
FGFRL1  
PRR5  
SNX20  
VGLL4  
KRT3  
ANKRD6  
GAST  
HSP90B3P  
UBE2D2  
MIR3187  
CHAMP1  
ANKRD11  
LPCAT1  
MOK  
CYTL1  
TRMU  
LOC146481  
EDEM1  
KRT4  
CDK19

FZD2  
GBP7  
EIF4EBP3  
MIR4745  
FAM70B  
OSGIN1  
CLPTM1L  
SEL1L  
PIGG  
PANX2  
CNEP1R1  
TBC1D5  
KRT5  
MDN1  
G6PC  
C1orf146  
PCDHGB4  
C13orf35  
GINS2  
ROPN1L  
TNFAIP2  
STK32B  
CERK  
LOC283914  
TATDN2  
KRT6A  
TSPYL4  
KAT2A  
FAM69A  
HDAC3  
FLJ44054  
TRAPPC2L  
MED10  
TRAF3  
LYAR  
ALG12  
SLC6A10P  
SRGAP3  
KRT6B  
UFL1  
GFAP  
GBP1P1  
NRG2  
FLJ41484  
NECAB2  
NKD2  
TSHR

KIAA1530  
CRELD2  
C16orf87  
IQSEC1  
KRT7  
PNISR  
CCR10  
FLJ27354  
RNF14  
LINC00460  
KLHDC4  
FAM105B  
VRK1  
ZFYVE28  
ADM2  
LOC388276  
ARPC4  
KRT8  
FBXL4  
GRB7  
FLJ31662  
PCDHGA8  
FAM155A  
DEF8  
ZNF622  
WARS  
TNIP2  
TRABD  
LOC390705  
TADA3  
KRT18  
SESN1  
GRN  
GEMIN8P4  
PCDHA9  
LINC00552  
BANP  
C5orf55  
XRCC3  
HAUS3  
SELO  
FLJ26245  
ATG7  
KRT81  
OSTM1  
HCRT  
LOC729970

MATR3  
MCF2L-AS1  
ZDHC7  
CCDC127  
YY1  
ABCA11P  
HDAC10  
HERC2P4  
CHL1  
KRT82  
NDUFAF4  
HOXB1  
MIR760  
KIAA0141  
LOC100506394  
JPH3  
UBE2QL1  
GPR68  
MFSD7  
LDOC1L  
UBE2MP1  
CAND2  
KRT83  
DSE  
HOXB2  
LOC100129046  
JAKMIP2  
KIAA1609  
C5orf49  
TCL1A  
TMEM175  
SHANK3  
LOC643714  
RFTN1  
KRT84  
TUBE1  
HOXB3  
LOC100131564  
SLC23A1  
WFDC1  
FAM173B  
GPR65  
TMEM128  
TUBGCP6  
LOC643802  
NUP210  
KRT85

C6orf203  
HOXB4  
TMEM56-RWDD3  
GNPDA1  
MTHFSD  
CMBL  
ADAM6  
C4orf42  
LOC90834  
CRNDE  
PLCL2  
KRT86  
CDC40  
HOXB5  
SRA1  
DBNDD1  
PLEKHG4B  
DLK1  
TMEM129  
LMF2  
LINC00273  
ANKRD28  
LALBA  
RWDD1  
HOXB6  
G3BP1  
KLHL36  
C5orf38  
CCNK  
EVC2  
PHF21B  
TP53TG3C  
CAPN7  
NELL2  
COQ3  
HOXB7  
APBB3  
FBXO31  
IRX2  
MTA1  
OTOP1  
KLHDC7B  
LOC729264  
MKRN2  
NFE2  
SOBP  
HOXB8

TNIP1  
CDT1  
ADAMTS16  
RPS6KA5  
ZNF595  
LOC150381  
TP53TG3B  
THUMPD3  
SLC11A2  
QRSL1  
HOXB9  
TCERG1  
MAP1LC3B  
LOC255167  
TRIP11  
JAKMIP1  
C22orf40  
LOC100130700  
HAACL1  
PCBP2  
PDSS2  
HSD17B1  
SPINK5  
HSDL1  
LOC285577  
NRXN3  
FAM53A  
CN5H6.4  
LOC100505619  
TTLL3  
PDE1B  
GOPC  
IFI35  
SYNPO  
CRISPLD2  
LOC285692  
BAG5  
ZBTB49  
LOC284933  
LOC100507577  
CNTN6  
PFDN5  
LYRM2  
IGFBP4  
ABLIM3  
SPIRE2  
LOC285696

C14orf2  
ZNF721  
RPL23AP82  
MIR548AE2  
LSM3  
PFKM  
HACE1  
ITGA2B  
HMGXB3  
ZNF469  
SLC6A19  
CDC42BPB  
ZNF718  
LOC339685  
LINC00312  
POU6F1  
BEND3  
ITGB3  
ARHGAP26  
CENPBD1  
LOC340094  
TCL1B  
CRIPAK  
C22orf34  
LMCD1  
PPP1R1A  
PRDM13  
JUP  
HARS2  
ZNF276  
SLC6A18  
KIAA0125  
LOC285484  
CHKB-CPT1B  
C3orf32  
PRKAG1  
BACH2  
KCNJ12  
PCDHGA12  
KCNG4  
LRRC14B  
TECPR2  
DOK7  
LINC00207  
TRNT1  
PRPH  
POPDC3

KPNB1  
LRRTM2  
RNF166  
FLJ33360  
GOLGA5  
FLJ35424  
MIRLET7BHG  
CRBN  
TWF1  
MICAL1  
KRT9  
CCDC69  
DNAAF1  
TAG  
FBLN5  
RNF212  
FLJ46257  
C3orf19  
RARG  
MANEA  
KRT10  
PCDHB5  
SPATA2L  
MARCH11  
SIVA1  
C4orf10  
IL17REL  
GHRL  
RNY5  
GPR63  
KRT12  
SNORA74A  
C16orf55  
LOC442132  
CYP46A1  
NAT8L  
MIRLET7A3  
ARL8B  
SCN8A  
ARMC2  
KRT13  
IL17B  
ZC3H18  
ANKRD33B  
PAPOLA  
C4orf44  
MIRLET7B

SETD5  
SMARCD1  
RPF2  
KRT14  
PCDHB1  
SLC38A8  
SDHAP3  
PTPN21  
FAM86EP  
LINC00229  
TMEM40  
SP1  
MCHR2  
KRT15  
DCTN4  
SLC22A31  
LOC728613  
RCOR1  
POLN  
FAM116B  
TMEM111  
TARBP2  
FAXC  
KRT16  
MZB1  
FLJ30679  
LOC729506  
PACS2  
C4orf48  
PIM3  
BRK1  
TMBIM6  
GJA10  
KRT17  
PAIP2  
LOC146513  
SNORD123  
PPP1R13B  
LOC402160  
ODF3B  
RAD18  
TFCP2  
RTN4IP1  
KRT19  
PCDH12  
ZFPM1  
LOC100130744

DICER1  
ZNF876P  
PRR5-ARHGAP8  
LRRN1  
VDR  
USP45  
KRT31  
LARS  
ADAD2  
MIR4277  
FLRT2  
ZNF732  
SYCE3  
CIDEA  
WNT1  
SLC22A16  
KRT32  
CXXC5  
MGC23284  
MIR4278  
KIF26A  
SCARNA22  
LOC730668  
ZFYVE20  
WNT10B  
KIAA1919  
KRT33A  
RBM27  
LINC00311  
LOC100505738  
C14orf109  
MIR943  
LOC100128946  
MTMR14  
MAP3K12  
GTF3C6  
KRT33B  
PCDHB18  
ZNF778  
LOC100505806  
TCL6  
LOC100129917  
LOC100144603  
MRPS25  
TUBA1A  
KLHL32  
KRT34

PCDHB17  
ACSF3  
LOC100506688  
PRO1768  
LOC100130872  
LOC100271722  
CRELD1  
MLL2  
NUS1  
KRT35  
WDR55  
LINC00304  
MIR4458  
GPR132  
LOC100133461  
MIR1249  
TMEM43  
AAAS  
SLC16A10  
LASP1  
ANKHD1  
SNAI3  
MIR4454  
SERPINA10  
TMED11P  
MIR3201  
ZNF385D  
SOAT2  
BVES-AS1  
LGALS9  
TMC06  
FAM92B  
MIR4457  
GLRX5  
LOC100507266  
MIR3619  
HDAC11  
NPFF  
CCDC162P  
LHX1  
RBM22  
CTU2  
MIR4637  
EVL  
MIR378D1  
LOC100506714  
TSEN2

ENDOU  
AKD1  
LIG3  
PCDHGC5  
PABPN1L  
MIR4636  
C14orf129  
MIR4800  
MIR4763  
GRIP2  
KRT75  
NT5DC1  
NBR1  
PCDHGC4  
LOC400548  
MIR4456  
CINP  
HTT-AS1  
MIR4762  
C3orf20  
SCAF11  
FAM26D  
MAPT  
PCDHGB7  
LOC400550  
MIR4635  
ASB2  
MIR4535  
JAGN1  
DDX23  
ZUFSP  
ADAM11  
PCDHGB6  
LOC400558  
CPSF2  
GHRLOS2  
SLC4A8  
FAM162B  
MEOX1  
PCDHGB5  
C16orf74  
KCNK10  
IL17RC  
ESPL1  
HS3ST5  
MLLT6  
PCDHGB3

SNORD68  
CDCA4  
EAF1  
DAZAP2  
GPRC6A  
MPP2  
PCDHGB2  
LOC727710  
C14orf102  
OXNAD1  
TROAP  
RFX6  
MPP3  
PCDHGB1  
LOC732275  
ATG2B  
C3orf24  
YAF2  
VGLL2  
MYL4  
PCDHGA11  
LOC100128881  
UBR7  
GALNTL2  
TUBA1B  
LACE1  
MYO1D  
PCDHGA10  
LOC100130015  
MEG3  
KCNH8  
RAPGEF3  
MMS22L  
NAGLU  
PCDHGA9  
LOC100287036  
SMEK1  
CHCHD4  
MCRS1  
FAM26E  
NEUROD2  
PCDHGA7  
MIR1910  
BTBD7  
METTL6  
ATF7  
SCML4

NF1  
PCDHGA6  
C16orf95  
TDP1  
TAMM41  
GALNT6  
CEP57L1  
NFE2L1  
PCDHGA5  
MIR4722  
ZNF839  
IL17RE  
COPZ1  
PPIL6  
NMT1  
PCDHGA4  
SPATA7  
SGOL1  
FAIM2  
LOC285758  
NOS2  
PCDHGA3  
KCNK13  
PP2D1  
DDN  
FLJ34503  
NSF  
PCDHGA2  
C14orf132  
EFHB  
TENC1  
DCBLD1  
OMG  
PCDHGA1  
DDX24  
CPNE9  
KCNH3  
RSPH4A  
PEX12  
PCDHGB8P  
UNC79  
FGD5  
CBX5  
LINC00222  
PNMT  
PCDHB15  
BEGAIN

CIDECP  
ANP32D  
LIN28B  
MED1  
PCDHB14  
PPP4R4  
CNTN4  
SMUG1  
FAM26F  
PPY  
PCDHB13  
MOAP1  
SUMF1  
PRPF40B  
GSTM2P1  
PSMB3  
PCDHB12  
DIO3OS  
RPU3D3  
METTL7A  
RFPL4B  
PYY  
PCDHB11  
INF2  
PRRT3  
LETMD1  
C6orf225  
PSMD3  
PCDHB10  
BCL11B  
LOC285370  
ZNF385A  
TSG1  
PSMD11  
PCDHB9  
OTUB2  
LOC285375  
RND1  
TRAF3IP2-AS1  
RAB5C  
PCDHB8  
ZFYVE21  
DPH3  
RACGAP1  
LOC728012  
RAD51D  
PCDHB7

MEG8  
LOC339862  
SENP1  
TPI1P3  
RARA  
PCDHB6  
WDR25  
COL6A4P1  
PDZRN4  
C6orf186  
RPL19  
PCDHB4  
LINC00341  
TPRXL  
DHH  
BET3L  
RPL23A  
PCDHB3  
CLMN  
LHFPL4  
PLEKHA8P1  
LOC100130890  
RPL27  
PCDHB2  
CATSPERB  
VENTXP7  
IRAK4  
MIR2113  
CCL1  
PCDHAC2  
ZC3H14  
LOC401052  
FKBP11  
MIR548H3  
CCL2  
PCDHAC1  
RIN3  
LOC440944  
KRT76  
LOC100422737  
CCL3  
PCDHA13  
C14orf159  
SNORA7A  
CSAD  
MIR4464  
CCL3L1

PCDHA12  
TMEM121  
MIR563  
BIN2  
MIR4643  
CCL4  
PCDHA11  
AMN  
MIR885  
LIMA1  
CCL5  
PCDHA10  
IFI27L2  
EGOT  
PPHLN1  
CCL7  
PCDHA8  
SETD3  
GHRLOS  
HDAC7  
CCL8  
PCDHA7  
APOPT1  
LOC100129480  
GPR84  
CCL11  
PCDHA6  
HHIPL1  
LOC100132526  
SLC38A2  
CCL13  
PCDHA5  
C14orf142  
LOC100288428  
PRR13  
CCL14  
PCDHA4  
STON2  
MIR4270  
KANSL2  
CCL15  
PCDHA3  
FAM181A  
MIR3714  
SLC38A4  
CCL16  
PCDHA2

BTBD6  
FGD5-AS1  
KIF21A  
CCL18  
PCDHA1  
EFCAB11  
LOC100505696  
SLC48A1  
CCL23  
VTRNA1-3  
EXOC3L4  
LOC100507582  
LMBR1L  
SDF2  
VTRNA1-2  
WDR20  
ARPC4-TTLL3  
SMAGP  
SH3GL1P1  
VTRNA1-1  
AHNAK2  
MIR4791  
DIP2B  
SH3GL1P2  
NMUR2  
TRMT61A  
MIR4790  
CALCOCO1  
SLC4A1  
KCTD16  
TDRD9  
MIR548AC  
NCKAP5L  
SLC6A4  
PCDHB16  
ANKRD9  
C12orf10  
SMARCE1  
HMHB1  
AK7  
C12orf44  
SP2  
SIL1  
IFI27L1  
SPATS2  
STAT3  
ARAP3

C14orf79  
TMEM106C  
STAT5A  
PCYOX1L  
PLD4  
RPAP3  
STAT5B  
SH3TC2  
ADSSL1  
DNAJC22  
SUPT6H  
NDFIP1  
TTC8  
ADAMTS20  
TADA2A  
FBXO38  
TC2N  
SLC38A1  
HNF1B  
YIPF5  
SLC24A4  
CSRNP2  
MLX  
TIGD6  
SLC25A29  
PUS7L  
THRA  
SPRY4  
DEGS2  
RACGAP1P  
TNFAIP1  
SLC4A9  
LINC00239  
FAM186B  
TOP2A  
SLC25A2  
LOC145216  
TMEM117  
DNAJC7  
PCDHB19P  
GSC  
TUBA1C  
TUBG1  
PSD2  
SERPINA12  
ALG10  
UBTF

C5orf32  
PRIMA1  
SPRYD3  
VTN  
SPINK7  
CEP128  
MFSD5  
WNT3  
C5orf62  
TTC7B  
C12orf62  
WNT9B  
FCHSD1  
C14orf49  
ZCRB1  
PCGF2  
ZNF300  
EML5  
CCDC65  
ZNF207  
MYOZ3  
MGC23270  
LACRT  
TAF15  
SLC35A4  
NUDT14  
FMNL3  
RND2  
SCGB3A2  
LINC00521  
CERS5  
PIP4K2B  
PPARGC1B  
SERPINA11  
FAM113B  
FOXN1  
AFAP1L1  
LOC283585  
KRT71  
CNTNAP1  
GRPEL2  
LOC283587  
LARP4  
TCAP  
GPR151  
FAM181A-AS1  
SLC2A13

SKAP1  
ZNF300P1  
SNHG10  
DCD  
AOC3  
SLC36A2  
C14orf177  
MUCL1  
BECN1  
SPINK13  
SLC25A47  
LRRK2  
KRT38  
LOC153469  
LINC00523  
FAM186A  
KRT37  
ZMAT2  
KIAA0284  
RHEBL1  
KRT36  
PRELID2  
C14orf80  
C12orf54  
KSR1  
SH3RF2  
CCDC85C  
ZNF641  
CDK5R1  
PLAC8L1  
ITPK1-AS1  
OR10AD1  
HAP1  
SPATA24  
SERPINA9  
SP7  
MAP3K14  
DNAJC18  
LINC00226  
GTSF1  
SLC13A2  
STK32A  
LINC00221  
KRT74  
UNC119  
SLC36A1  
COX8C

ASB8  
TIAF1  
RELL2  
ASPG  
KRT72  
ZNHIT3  
SLC36A3  
SERPINA13  
PRICKLE1  
EFTUD2  
TMEM173  
C14orf64  
BCDIN3D  
RPL23  
ARSI  
RTL1  
ALG10B  
NPEPPS  
IRGM  
TMEM179  
CPNE8  
GOSR1  
DND1  
LOC400236  
KRT80  
CCL4L1  
C5orf65  
LOC400238  
GRASP  
GOSR2  
C5orf46  
DICER1-AS1  
KRT78  
NR1D1  
ARHGEF37  
C14orf180  
ANO6  
TRAF4  
SPINK6  
MIR127  
ARID2  
KIAA0100  
ANKHD1-EIF4EBP3  
MIR134  
LOC255411  
TBKBP1  
MIR143

MIR136  
LOC283332  
PLEKHM1  
MIR145  
MIR154  
LOC283335  
MED24  
SPINK14  
MIR203  
ZNF740  
LRRC37A  
IGIP  
MIR299  
LOC283403  
HDAC5  
ECSCR  
CCDC88C  
LOC283404  
GJC1  
GRXCR2  
MIR323A  
C12orf40  
PSME3  
SPINK9  
MIR337  
GXYLT1  
EIF1  
SNHG4  
MIR345  
TMPRSS12  
NBR2  
MIR143HG  
MIR376C  
KRT6C  
CALCOCO2  
LOC729080  
MIR369  
KRT73  
RAMP2  
MIR3655  
MIR376A1  
C1QL4  
HOXB13  
LOC100505658  
MIR377  
KRT79  
VAT1

MIR379  
SYT10  
LEPREL4  
MIR380  
ANKRD33  
HEXIM1  
MIR381  
H1FNT  
SPAG5  
MIR382  
OR8S1  
CCT6B  
MIR433  
AMIGO2  
C1QL1  
MIR431  
KRT77  
RUNDC3A  
MIR329-1  
C12orf68  
STARD3  
MIR329-2  
LOC400027  
CBX1  
MIR323B  
LOC400043  
DDX52  
MIR409  
FIGNL2  
DUSP14  
MIR412  
MIR196A2  
SYNRG  
MIR410  
DBX2  
CASC3  
MIR376B  
FLJ12825  
IKZF3  
MIR485  
MIR148B  
SARM1  
MIR493  
HIGD1C  
GPATCH8  
MIR432  
GLYCAM1

KCNH4  
MIR494  
HNRNPA1P10  
SUZ12  
MIR495  
SNORA2A  
FAM215A  
MIR496  
SNORA2B  
PPY2  
MIR487A  
SNORA34  
PYY2  
TEX22  
MIR615  
KRT23  
MIR539  
HOTAIR  
TMEM98  
MIR376A2  
LOC100233209  
POLDIP2  
MIR487B  
LOC100240734  
TBC1D29  
SCARNA13  
LOC100240735  
WSB1  
SNORA28  
LOC100286844  
ERAL1  
SNORA79  
MIR1293  
AATF  
MIR411  
MIR1291  
SNORD4B  
MIR654  
LOC100335030  
SNORD4A  
MIR655  
MIR4701  
SNORD42B  
MIR656  
MIR3198-2  
SNORD42A  
SNORD113-1

MIR4698  
TUBG2  
SNORD113-2  
LOC100652999  
TMEM97  
SNORD113-4  
NKIRAS2  
SNORD113-5  
CCDC56  
SNORD113-6  
GIT1  
SNORD113-7  
PSMC3IP  
SNORD113-9  
SNX11  
SNORD114-1  
TBX21  
SNORD114-2  
SOCS7  
SNORD114-3  
SOST  
SNORD114-4  
RAPGEFL1  
SNORD114-5  
COPZ2  
SNORD114-6  
PIPOX  
SNORD114-7  
ARL17A  
SNORD114-8  
CRLF3  
SNORD114-9  
SLC25A39  
SNORD114-10  
NLK  
SNORD114-11  
HIGD1B  
SNORD114-12  
CDK12  
SNORD114-13  
KRT20  
SNORD114-14  
NLE1  
SNORD114-15  
FNDC8  
SNORD114-16  
CWC25

SNORD114-17  
LRRC37A4  
SNORD114-18  
SLFN12  
SNORD114-19  
PNPO  
SNORD114-20  
KLHL11  
SNORD114-21  
RHOT1  
SNORD114-22  
C17orf79  
SNORD114-23  
C17orf63  
SNORD114-24  
ADAP2  
SNORD114-25  
UTP6  
SNORD114-26  
GSDMB  
SNORD114-27  
ATXN7L3  
SNORD114-28  
PLXDC1  
SNORD114-29  
LYZL6  
SNORD114-30  
NUFIP2  
SNORD114-31  
TAOK1  
MIR758  
ARHGAP23  
MIR668  
PHF12  
MIR770  
FKBP10  
SNORA11B  
C17orf75  
MIR300  
UBE2Z  
MIR541  
WNK4  
MIR665  
C17orf53  
MIR543  
TMUB2  
MIR889

DHX58  
ZBTB42  
MMP28  
LOC100129345  
DHRS11  
LOC100131366  
PRR15L  
MIR1247  
TEFM  
MIR1185-1  
ACBD4  
MIR1185-2  
DCAKD  
MIR1197  
GGNBP2  
MIR1193  
ATAD5  
MIR4309  
MRM1  
MIR3173  
PLEKHH3  
LOC100507043  
DBF4B  
MIR3545  
MYO19  
MIR4710  
CDK5RAP3  
MIR2392  
SP6  
LOC100628307  
COASY  
SRCIN1  
AARSD1  
KRTAP1-3  
KRTAP1-1  
KRTAP9-9  
KRTAP4-6  
KRTAP2-1  
TTC25  
KRTAP4-12  
RAB34  
KRTAP1-5  
KRTAP3-1  
KRTAP3-2  
KRTAP9-2  
KRTAP9-3  
KRTAP9-8

KRTAP17-1  
NSRP1  
PPP1R1B  
TBC1D3F  
RNF135  
MIEN1  
MRPL45  
VPS25  
TMEM101  
PRAC  
RAB11FIP4  
GHDC  
KRTAP4-4  
CORO6  
TNS4  
FBXL20  
KRTAP9-4  
KRTAP4-1  
KRTAP4-5  
KRTAP4-3  
KRTAP4-2  
KRTAP3-3  
KRTAP2-4  
SSH2  
TP53I13  
IFT20  
LRRC46  
SCRN2  
AOC4  
ZNF830  
SLFN11  
RASL10B  
G6PC3  
ASB16  
PGAP3  
PIGS  
HSPB9  
ORMDL3  
PLCD3  
SLC46A1  
TMEM106A  
LRRC37B  
OSBPL7  
NT5C3L  
ABHD15  
TLCD1  
RFFL

ZPBP2  
C17orf46  
HEXIM2  
LSM12  
CCDC43  
CNTD1  
TMEM132E  
SPACA3  
SGK494  
SEZ6  
ANKRD13B  
C17orf57  
MRPL10  
GJD3  
KRT222  
KRT40  
C17orf50  
SLFN13  
SLC35G3  
UNC45B  
CD300LG  
KIF18B  
RUNDC1  
TMEM199  
PROCA1  
DHRS13  
C17orf69  
LOC147093  
LRRC37BP1  
WIPF2  
KRT25  
TMEM99  
SLFN5  
NAGS  
FAM134C  
RHBDL3  
IMP5  
KRT28  
KRT24  
ARHGAP27  
ZNF385C  
C17orf108  
RDM1  
GAS2L2  
STH  
C17orf66  
KIAA1267

C17orf105  
FAM171A2  
C17orf104  
TTLL6  
KRT18P55  
NEK8  
PIGW  
C17orf78  
LOC284100  
CISD3  
GSDMA  
KRT42P  
PTRF  
FAM27L  
FLJ36000  
KLHL10  
C17orf65  
C17orf51  
MSL1  
KRT27  
SLFN14  
FLJ43826  
STAC2  
CCL14-CCL15  
KRT26  
HOXB13-AS1  
EFCAB5  
TMIGD1  
CCL4L2  
C17orf98  
LOC388387  
CCDC103  
RPRML  
ARL5C  
KRT39  
MYO18A  
C17orf102  
MGC57346  
LOC404266  
MIR10A  
MIR144  
MIR152  
MIR193A  
MIR196A1  
TBC1D3B  
TBC1D3C  
CCL3L3

TBC1D3P5  
SUZ12P  
LOC440434  
GPR179  
LRRC37A2  
FBXO47  
MIR423  
ARGFXP2  
DPRXP4  
MIR451A  
SNORA21  
LOC644172  
LOC644246  
SEBOX  
KRTAP4-11  
MRPL45P2  
TBC1D3G  
SNORD7  
MIR632  
KRTAP4-8  
KRTAP2-2  
KRTAP9-1  
NSFP1  
TBC1D3  
TBC1D3H  
LOC730755  
SNORD124  
MIR365B  
LOC100128977  
LOC100130148  
LOC100130581  
LOC100131347  
KRTAP4-9  
KRTAP4-7  
LOC100133991  
KCNJ18  
C17orf96  
LOC100190938  
MIR1203  
MIR2117  
MIR4315-2  
MIR2909  
MIR3185  
MIR3184  
MIR4315-1  
MTRNR2L1  
LOC100505576

LRRC3C  
KRTAP16-1  
LOC100505782  
ARL17B  
SPAG5-AS1  
AA06  
SLFN12L  
RAD51L3-RFFL  
MIR4523  
MIR4728  
MIR4726  
MIR4734  
MIR4724  
MIR4733  
MIR451B  
MIR4522  
MIR4732  
MIR4723  
MIR4727  
MIR4725  
RAB34

Supplementary Table 5. Immune subtypes in 7 cancer types

| TCGA_type | TCGA_Barcode     | Subtype |
|-----------|------------------|---------|
| COAD      | TCGA-CM-5864-01A | A       |
| COAD      | TCGA-AD-6890-01A | A       |
| COAD      | TCGA-AA-3516-01A | B       |
| COAD      | TCGA-AA-A00K-01A | A       |
| COAD      | TCGA-A6-2679-01A | B       |
| COAD      | TCGA-CM-4747-01A | B       |
| COAD      | TCGA-AA-3833-01A | B       |
| COAD      | TCGA-CM-6675-01A | A       |
| COAD      | TCGA-AA-A00E-01A | B       |
| COAD      | TCGA-AA-3544-01A | B       |
| COAD      | TCGA-AA-3655-01A | A       |
| COAD      | TCGA-DM-A280-01A | A       |
| COAD      | TCGA-AA-3666-01A | A       |
| COAD      | TCGA-AA-3818-01A | A       |
| COAD      | TCGA-F4-6569-01A | B       |
| COAD      | TCGA-AA-3522-01A | B       |
| COAD      | TCGA-AA-3548-01A | B       |
| COAD      | TCGA-CM-5344-01A | A       |
| COAD      | TCGA-D5-6538-01A | A       |
| COAD      | TCGA-AA-3939-01A | B       |
| COAD      | TCGA-D5-6539-01A | B       |
| COAD      | TCGA-CA-5797-01A | A       |
| COAD      | TCGA-AA-3495-01A | B       |
| COAD      | TCGA-G4-6586-01A | A       |
| COAD      | TCGA-AY-A69D-01A | A       |
| COAD      | TCGA-D5-7000-01A | B       |
| COAD      | TCGA-G4-6294-01A | A       |
| COAD      | TCGA-AA-3531-01A | A       |
| COAD      | TCGA-AD-6899-01A | B       |
| COAD      | TCGA-A6-5662-01A | A       |
| COAD      | TCGA-F4-6460-01A | A       |
| COAD      | TCGA-G4-6320-01A | A       |
| COAD      | TCGA-AA-3552-01A | B       |
| COAD      | TCGA-CK-4952-01A | A       |
| COAD      | TCGA-AZ-6605-01A | B       |
| COAD      | TCGA-DM-A0X9-01A | A       |
| COAD      | TCGA-A6-2684-01C | A       |
| COAD      | TCGA-AA-3842-01A | A       |
| COAD      | TCGA-D5-6929-01A | A       |
| COAD      | TCGA-G4-6293-01A | B       |
| COAD      | TCGA-AA-A010-01A | B       |
| COAD      | TCGA-G4-6303-01A | A       |
| COAD      | TCGA-A6-5659-01B | A       |
| COAD      | TCGA-D5-6924-01A | A       |
| COAD      | TCGA-AA-A00Z-01A | A       |

|      |                  |   |
|------|------------------|---|
| COAD | TCGA-AA-3526-01A | B |
| COAD | TCGA-AD-6901-01A | A |
| COAD | TCGA-AA-A00F-01A | B |
| COAD | TCGA-CM-6162-01A | B |
| COAD | TCGA-AA-3989-01A | B |
| COAD | TCGA-AZ-6606-01A | A |
| COAD | TCGA-D5-6928-01A | B |
| COAD | TCGA-G4-6317-01A | A |
| COAD | TCGA-A6-2675-01A | B |
| COAD | TCGA-D5-6531-01A | B |
| COAD | TCGA-AD-6888-01A | A |
| COAD | TCGA-A6-2672-01B | A |
| COAD | TCGA-G4-6297-01A | B |
| COAD | TCGA-AA-3664-01A | A |
| COAD | TCGA-CM-6674-01A | A |
| COAD | TCGA-A6-6137-01A | B |
| COAD | TCGA-AA-3527-01A | A |
| COAD | TCGA-AA-3519-01A | B |
| COAD | TCGA-F4-6856-01A | B |
| COAD | TCGA-AA-3949-01A | B |
| COAD | TCGA-G4-6323-01A | B |
| COAD | TCGA-AY-6196-01A | B |
| COAD | TCGA-AA-3852-01A | B |
| COAD | TCGA-AA-3534-01A | A |
| COAD | TCGA-AA-A01X-01A | A |
| COAD | TCGA-AZ-5403-01A | A |
| COAD | TCGA-A6-A565-01A | B |
| COAD | TCGA-AA-3955-01A | A |
| COAD | TCGA-DM-A28E-01A | A |
| COAD | TCGA-AA-3530-01A | A |
| COAD | TCGA-CM-5868-01A | A |
| COAD | TCGA-AA-3841-01A | B |
| COAD | TCGA-AA-3856-01A | B |
| COAD | TCGA-DM-A1HA-01A | A |
| COAD | TCGA-DM-A0XD-01A | A |
| COAD | TCGA-5M-AAT5-01A | A |
| COAD | TCGA-AZ-6607-01A | B |
| COAD | TCGA-AD-6963-01A | A |
| COAD | TCGA-G4-6304-01A | A |
| COAD | TCGA-AZ-6603-01A | A |
| COAD | TCGA-AA-A00O-01A | A |
| COAD | TCGA-4N-A93T-01A | A |
| COAD | TCGA-5M-AAT4-01A | A |
| COAD | TCGA-AA-3496-01A | B |
| COAD | TCGA-NH-A50V-01A | B |
| COAD | TCGA-A6-6782-01A | A |
| COAD | TCGA-CK-5912-01A | A |

|      |                  |   |
|------|------------------|---|
| COAD | TCGA-AA-3696-01A | A |
| COAD | TCGA-G4-6306-01A | A |
| COAD | TCGA-AA-3844-01A | A |
| COAD | TCGA-AA-A03J-01A | A |
| COAD | TCGA-CA-6719-01A | A |
| COAD | TCGA-AA-3966-01A | A |
| COAD | TCGA-AA-3517-01A | B |
| COAD | TCGA-AA-3553-01A | B |
| COAD | TCGA-QG-A5YV-01A | A |
| COAD | TCGA-AA-3662-01A | B |
| COAD | TCGA-AA-3511-01A | A |
| COAD | TCGA-G4-6317-02A | A |
| COAD | TCGA-AZ-4682-01B | A |
| COAD | TCGA-DM-A1HB-01A | A |
| COAD | TCGA-A6-2680-01A | B |
| COAD | TCGA-AZ-6600-01A | B |
| COAD | TCGA-AA-3697-01A | B |
| COAD | TCGA-A6-6781-01B | B |
| COAD | TCGA-AA-A02R-01A | A |
| COAD | TCGA-F4-6805-01A | B |
| COAD | TCGA-AA-3976-01A | A |
| COAD | TCGA-D5-6532-01A | A |
| COAD | TCGA-AA-A00L-01A | A |
| COAD | TCGA-CM-4743-01A | A |
| COAD | TCGA-4T-AA8H-01A | A |
| COAD | TCGA-AA-3542-01A | A |
| COAD | TCGA-AA-3941-01A | A |
| COAD | TCGA-AA-A024-01A | A |
| COAD | TCGA-AZ-4615-01A | A |
| COAD | TCGA-AA-3970-01A | B |
| COAD | TCGA-CK-4947-01B | B |
| COAD | TCGA-D5-6533-01A | A |
| COAD | TCGA-D5-6535-01A | B |
| COAD | TCGA-NH-A8F7-01A | A |
| COAD | TCGA-G4-6315-01A | A |
| COAD | TCGA-AA-3660-01A | B |
| COAD | TCGA-CA-5254-01A | B |
| COAD | TCGA-D5-5538-01A | B |
| COAD | TCGA-G4-6298-01A | A |
| COAD | TCGA-F4-6570-01A | B |
| COAD | TCGA-3L-AA1B-01A | B |
| COAD | TCGA-AA-3549-01A | A |
| COAD | TCGA-DM-A28G-01A | A |
| COAD | TCGA-A6-3808-01A | B |
| COAD | TCGA-AA-3875-01A | B |
| COAD | TCGA-CM-5341-01A | A |
| COAD | TCGA-DM-A1D8-01A | A |

|      |                  |   |
|------|------------------|---|
| COAD | TCGA-AA-3555-01A | A |
| COAD | TCGA-AA-3982-01A | B |
| COAD | TCGA-A6-3810-01B | A |
| COAD | TCGA-A6-6138-01A | B |
| COAD | TCGA-AY-6386-01A | B |
| COAD | TCGA-D5-6923-01A | A |
| COAD | TCGA-A6-2671-01A | A |
| COAD | TCGA-D5-6920-01A | B |
| COAD | TCGA-CK-6747-01A | A |
| COAD | TCGA-AA-3994-01A | A |
| COAD | TCGA-AA-3510-01A | B |
| COAD | TCGA-AZ-4684-01A | B |
| COAD | TCGA-T9-A92H-01A | A |
| COAD | TCGA-AA-3538-01A | B |
| COAD | TCGA-A6-5664-01A | B |
| COAD | TCGA-AA-3713-01A | B |
| COAD | TCGA-F4-6463-01A | A |
| COAD | TCGA-AA-3867-01A | B |
| COAD | TCGA-AA-3715-01A | B |
| COAD | TCGA-AZ-4308-01A | A |
| COAD | TCGA-AA-3984-01A | B |
| COAD | TCGA-DM-A28M-01A | A |
| COAD | TCGA-AA-A02K-01A | A |
| COAD | TCGA-AA-A01Z-01A | A |
| COAD | TCGA-CM-4752-01A | B |
| COAD | TCGA-F4-6809-01A | A |
| COAD | TCGA-CA-5796-01A | B |
| COAD | TCGA-AU-3779-01A | A |
| COAD | TCGA-AA-3968-01A | B |
| COAD | TCGA-DM-A28K-01A | A |
| COAD | TCGA-AA-3685-01A | B |
| COAD | TCGA-DM-A1DB-01A | A |
| COAD | TCGA-AA-3675-01A | A |
| COAD | TCGA-AD-6964-01A | B |
| COAD | TCGA-AZ-6599-01A | A |
| COAD | TCGA-CA-6718-01A | B |
| COAD | TCGA-AA-3672-01A | B |
| COAD | TCGA-AA-3562-01A | B |
| COAD | TCGA-AZ-4313-01A | A |
| COAD | TCGA-AA-3811-01A | B |
| COAD | TCGA-AA-3861-01A | B |
| COAD | TCGA-AA-A02W-01A | A |
| COAD | TCGA-A6-3807-01A | A |
| COAD | TCGA-CM-6172-01A | B |
| COAD | TCGA-A6-5665-01A | B |
| COAD | TCGA-AA-3979-01A | A |
| COAD | TCGA-AA-A01K-01A | B |

|      |                  |   |
|------|------------------|---|
| COAD | TCGA-AA-3858-01A | B |
| COAD | TCGA-D5-6931-01A | B |
| COAD | TCGA-AD-A5EK-01A | A |
| COAD | TCGA-DM-A1D6-01A | A |
| COAD | TCGA-AA-3869-01A | B |
| COAD | TCGA-AA-3525-01A | B |
| COAD | TCGA-A6-2678-01A | B |
| COAD | TCGA-A6-5661-01B | B |
| COAD | TCGA-AA-3529-01A | A |
| COAD | TCGA-AA-A02F-01A | A |
| COAD | TCGA-CK-6746-01A | A |
| COAD | TCGA-A6-6654-01A | B |
| COAD | TCGA-AA-3972-01A | A |
| COAD | TCGA-G4-6311-01A | B |
| COAD | TCGA-AA-3667-01A | A |
| COAD | TCGA-F4-6854-01A | A |
| COAD | TCGA-A6-6650-01B | A |
| COAD | TCGA-AA-A02E-01A | A |
| COAD | TCGA-CA-6715-01A | A |
| COAD | TCGA-G4-6626-01A | A |
| COAD | TCGA-CM-6164-01A | A |
| COAD | TCGA-AA-3663-01A | A |
| COAD | TCGA-AA-3855-01A | B |
| COAD | TCGA-QL-A97D-01A | B |
| COAD | TCGA-AA-3710-01A | B |
| COAD | TCGA-A6-5657-01A | B |
| COAD | TCGA-A6-2683-01A | A |
| COAD | TCGA-G4-6307-01A | A |
| COAD | TCGA-AA-A01D-01A | B |
| COAD | TCGA-F4-6807-01A | B |
| COAD | TCGA-AA-3973-01A | A |
| COAD | TCGA-AA-3862-01A | B |
| COAD | TCGA-A6-3809-01A | B |
| COAD | TCGA-A6-3809-01A | B |
| COAD | TCGA-AZ-4323-01A | B |
| COAD | TCGA-CK-4950-01A | B |
| COAD | TCGA-A6-2674-01B | B |
| COAD | TCGA-AZ-4614-01A | A |
| COAD | TCGA-AA-A00Q-01A | A |
| COAD | TCGA-NH-A6GB-01A | A |
| COAD | TCGA-CM-6167-01A | B |
| COAD | TCGA-G4-6322-01A | B |
| COAD | TCGA-AA-3514-01A | A |
| COAD | TCGA-CM-6679-01A | A |
| COAD | TCGA-AA-A02J-01A | A |
| COAD | TCGA-AA-3956-01A | B |
| COAD | TCGA-AA-A017-01A | A |

|      |                  |   |
|------|------------------|---|
| COAD | TCGA-F4-6855-01A | B |
| COAD | TCGA-NH-A50U-01A | A |
| COAD | TCGA-D5-6541-01A | B |
| COAD | TCGA-D5-6540-01A | A |
| COAD | TCGA-QG-A5YX-01A | A |
| COAD | TCGA-AY-4071-01A | B |
| COAD | TCGA-AA-3831-01A | B |
| COAD | TCGA-AA-3930-01A | B |
| COAD | TCGA-AA-3488-01A | A |
| COAD | TCGA-A6-6653-01A | A |
| COAD | TCGA-G4-6321-01A | B |
| COAD | TCGA-AA-A01T-01A | A |
| COAD | TCGA-AA-3814-01A | B |
| COAD | TCGA-A6-6648-01A | B |
| COAD | TCGA-AD-6965-01A | A |
| COAD | TCGA-AA-A01V-01A | A |
| COAD | TCGA-AD-5900-01A | B |
| COAD | TCGA-A6-6650-01A | A |
| COAD | TCGA-A6-6650-01A | A |
| COAD | TCGA-A6-5661-01A | B |
| COAD | TCGA-AA-3866-01A | A |
| COAD | TCGA-DM-A28A-01A | A |
| COAD | TCGA-NH-A6GC-01A | B |
| COAD | TCGA-AA-3986-01A | B |
| COAD | TCGA-AA-A01S-01A | A |
| COAD | TCGA-F4-6808-01A | A |
| COAD | TCGA-AA-3837-01A | B |
| COAD | TCGA-AD-6889-01A | A |
| COAD | TCGA-AA-3688-01A | B |
| COAD | TCGA-A6-4107-01A | B |
| COAD | TCGA-CM-4750-01A | B |
| COAD | TCGA-QG-A5Z1-01A | A |
| COAD | TCGA-AA-3845-01A | B |
| COAD | TCGA-AA-3980-01A | A |
| COAD | TCGA-D5-6529-01A | B |
| COAD | TCGA-A6-5666-01A | A |
| COAD | TCGA-G4-6295-01A | B |
| COAD | TCGA-A6-5656-01B | A |
| COAD | TCGA-A6-3810-01A | A |
| COAD | TCGA-A6-3810-01A | A |
| COAD | TCGA-AD-6895-01A | A |
| COAD | TCGA-AA-A00W-01A | A |
| COAD | TCGA-AA-A02H-01A | A |
| COAD | TCGA-CM-5861-01A | A |
| COAD | TCGA-NH-A5IV-01A | B |
| COAD | TCGA-A6-6651-01A | B |
| COAD | TCGA-DM-A28F-01A | A |

|      |                  |   |
|------|------------------|---|
| COAD | TCGA-G4-6627-01A | B |
| COAD | TCGA-D5-6927-01A | B |
| COAD | TCGA-AA-3860-01A | B |
| COAD | TCGA-D5-5537-01A | A |
| COAD | TCGA-CK-5914-01A | A |
| COAD | TCGA-CM-5348-01A | B |
| COAD | TCGA-AA-A020-01A | A |
| COAD | TCGA-CK-5915-01A | A |
| COAD | TCGA-CM-5863-01A | B |
| COAD | TCGA-AD-6548-01A | B |
| COAD | TCGA-AA-3502-01A | B |
| COAD | TCGA-A6-2677-01A | A |
| COAD | TCGA-AA-3673-01A | A |
| COAD | TCGA-A6-6649-01A | B |
| COAD | TCGA-AA-A022-01A | B |
| COAD | TCGA-CM-6163-01A | B |
| COAD | TCGA-WS-AB45-01A | B |
| COAD | TCGA-DM-A1D9-01A | A |
| COAD | TCGA-CM-6168-01A | B |
| COAD | TCGA-DM-A1D0-01A | A |
| COAD | TCGA-AA-3821-01A | A |
| COAD | TCGA-G4-6625-01A | B |
| COAD | TCGA-NH-A50T-01A | A |
| COAD | TCGA-AA-3532-01A | B |
| COAD | TCGA-AA-3819-01A | B |
| COAD | TCGA-D5-6930-01A | B |
| COAD | TCGA-AA-3950-01A | A |
| COAD | TCGA-A6-3809-01B | B |
| COAD | TCGA-D5-6530-01A | B |
| COAD | TCGA-CK-6748-01A | A |
| COAD | TCGA-AA-3848-01A | A |
| COAD | TCGA-AA-3850-01A | B |
| COAD | TCGA-QG-A5YW-01A | B |
| COAD | TCGA-AA-A03F-01A | B |
| COAD | TCGA-A6-2682-01A | B |
| COAD | TCGA-SS-A7HO-01A | A |
| COAD | TCGA-AA-A029-01A | A |
| COAD | TCGA-A6-6781-01A | B |
| COAD | TCGA-A6-6781-01A | B |
| COAD | TCGA-AA-3556-01A | B |
| COAD | TCGA-AU-6004-01A | B |
| COAD | TCGA-A6-6142-01A | A |
| COAD | TCGA-QG-A5Z2-01A | B |
| COAD | TCGA-D5-6922-01A | A |
| COAD | TCGA-AZ-5407-01A | B |
| COAD | TCGA-D5-6898-01A | A |
| COAD | TCGA-AA-3680-01A | B |

|      |                  |   |
|------|------------------|---|
| COAD | TCGA-D5-5540-01A | A |
| COAD | TCGA-A6-4105-01A | B |
| COAD | TCGA-CM-6677-01A | B |
| COAD | TCGA-CM-6676-01A | A |
| COAD | TCGA-AA-3524-01A | A |
| COAD | TCGA-A6-A566-01A | B |
| COAD | TCGA-AY-A8YK-01A | A |
| COAD | TCGA-AA-3692-01A | B |
| COAD | TCGA-CM-6171-01A | A |
| COAD | TCGA-AA-3846-01A | A |
| COAD | TCGA-AA-A00J-01A | A |
| COAD | TCGA-A6-A56B-01A | A |
| COAD | TCGA-A6-6140-01A | A |
| COAD | TCGA-DM-A1D4-01A | A |
| COAD | TCGA-CM-6170-01A | A |
| COAD | TCGA-CM-6165-01A | A |
| COAD | TCGA-AY-6197-01A | A |
| COAD | TCGA-G4-6299-01A | B |
| COAD | TCGA-AA-A01I-01A | A |
| COAD | TCGA-AA-3684-01A | B |
| COAD | TCGA-AY-A54L-01A | A |
| COAD | TCGA-A6-2684-01A | B |
| COAD | TCGA-A6-2684-01A | B |
| COAD | TCGA-AA-3815-01A | B |
| COAD | TCGA-AA-3509-01A | A |
| COAD | TCGA-DM-A0XF-01A | A |
| COAD | TCGA-CM-6166-01A | A |
| COAD | TCGA-AA-3854-01A | B |
| COAD | TCGA-A6-2681-01A | B |
| COAD | TCGA-AA-3977-01A | A |
| COAD | TCGA-AA-A01G-01A | A |
| COAD | TCGA-AA-3520-01A | B |
| COAD | TCGA-CM-5349-01A | A |
| COAD | TCGA-G4-6588-01A | A |
| COAD | TCGA-AY-5543-01A | A |
| COAD | TCGA-5M-AAT6-01A | B |
| COAD | TCGA-A6-A567-01A | A |
| COAD | TCGA-AZ-6598-01A | A |
| COAD | TCGA-RU-A8FL-01A | A |
| COAD | TCGA-AA-3554-01A | B |
| COAD | TCGA-A6-A5ZU-01A | A |
| COAD | TCGA-AZ-4315-01A | A |
| COAD | TCGA-AD-A5EJ-01A | A |
| COAD | TCGA-AA-A00U-01A | A |
| COAD | TCGA-AA-3506-01A | B |
| COAD | TCGA-NH-A8F7-06A | A |
| COAD | TCGA-AA-3947-01A | A |

|      |                  |   |
|------|------------------|---|
| COAD | TCGA-A6-6780-01A | B |
| COAD | TCGA-A6-6780-01A | B |
| COAD | TCGA-A6-5659-01A | A |
| COAD | TCGA-A6-5659-01A | A |
| COAD | TCGA-AZ-4616-01A | A |
| COAD | TCGA-AA-3877-01A | A |
| COAD | TCGA-AA-3543-01A | B |
| COAD | TCGA-AA-3681-01A | B |
| COAD | TCGA-AA-3693-01A | A |
| COAD | TCGA-A6-6780-01B | B |
| COAD | TCGA-DM-A28H-01A | A |
| COAD | TCGA-AA-3518-01A | B |
| COAD | TCGA-AA-3561-01A | A |
| COAD | TCGA-AM-5820-01A | A |
| COAD | TCGA-AA-3872-01A | B |
| COAD | TCGA-G4-6628-01A | B |
| COAD | TCGA-DM-A28C-01A | A |
| COAD | TCGA-AA-A00N-01A | A |
| COAD | TCGA-CK-6751-01A | A |
| COAD | TCGA-NH-A8F8-01A | A |
| COAD | TCGA-F4-6461-01A | B |
| COAD | TCGA-5M-AATA-01A | A |
| COAD | TCGA-CK-4948-01B | A |
| COAD | TCGA-AA-A01C-01A | A |
| COAD | TCGA-AA-A01F-01A | A |
| COAD | TCGA-G4-6314-01A | A |
| COAD | TCGA-DM-A285-01A | A |
| COAD | TCGA-A6-5660-01A | A |
| COAD | TCGA-CA-6717-01A | B |
| COAD | TCGA-CM-6678-01A | A |
| COAD | TCGA-CK-4951-01A | A |
| COAD | TCGA-AY-4070-01A | B |
| COAD | TCGA-A6-5665-01B | A |
| COAD | TCGA-AZ-6601-01A | B |
| COAD | TCGA-D5-5541-01A | A |
| COAD | TCGA-DM-A1D7-01A | A |
| COAD | TCGA-CA-5255-01A | A |
| COAD | TCGA-D5-6932-01A | A |
| COAD | TCGA-AZ-6608-01A | A |
| COAD | TCGA-G4-6309-01A | A |
| COAD | TCGA-F4-6703-01A | B |
| COAD | TCGA-CK-5913-01A | A |
| COAD | TCGA-AA-3521-01A | B |
| COAD | TCGA-G4-6310-01A | A |
| COAD | TCGA-AA-3679-01A | B |
| COAD | TCGA-AA-3492-01A | A |
| COAD | TCGA-CM-4746-01A | A |

|      |                  |   |
|------|------------------|---|
| COAD | TCGA-CM-6169-01A | B |
| COAD | TCGA-AA-A01P-01A | B |
| COAD | TCGA-AA-3489-01A | B |
| COAD | TCGA-DM-A282-01A | A |
| COAD | TCGA-F4-6704-01A | B |
| COAD | TCGA-AA-3560-01A | B |
| COAD | TCGA-AA-A00R-01A | B |
| COAD | TCGA-CM-4751-01A | B |
| COAD | TCGA-A6-2686-01A | B |
| COAD | TCGA-F4-6806-01A | B |
| COAD | TCGA-D5-6537-01A | A |
| COAD | TCGA-A6-2674-01A | B |
| COAD | TCGA-A6-2674-01A | B |
| COAD | TCGA-A6-2677-01B | A |
| COAD | TCGA-CA-5256-01A | A |
| COAD | TCGA-F4-6459-01A | A |
| COAD | TCGA-A6-2685-01A | B |
| COAD | TCGA-AA-A02Y-01A | A |
| COAD | TCGA-A6-2676-01A | A |
| COAD | TCGA-D5-5539-01A | B |
| COAD | TCGA-AA-3952-01A | B |
| COAD | TCGA-AM-5821-01A | A |
| COAD | TCGA-AA-A00D-01A | B |
| COAD | TCGA-AA-3851-01A | B |
| COAD | TCGA-CM-5862-01A | A |
| COAD | TCGA-NH-A6GA-01A | B |
| COAD | TCGA-AA-3870-01A | B |
| COAD | TCGA-D5-6926-01A | A |
| COAD | TCGA-CM-5860-01A | B |
| COAD | TCGA-A6-2672-01A | A |
| COAD | TCGA-AA-A01Q-01A | A |
| COAD | TCGA-DM-A288-01A | A |
| COAD | TCGA-AA-3678-01A | B |
| COAD | TCGA-AA-3812-01A | B |
| COAD | TCGA-CM-4748-01A | B |
| COAD | TCGA-D5-6536-01A | A |
| COAD | TCGA-DM-A1DA-01A | A |
| COAD | TCGA-AA-A004-01A | B |
| COAD | TCGA-CK-5916-01A | B |
| COAD | TCGA-AY-A71X-01A | A |
| COAD | TCGA-CM-4744-01A | A |
| COAD | TCGA-CM-6161-01A | A |
| COAD | TCGA-A6-5656-01A | A |
| COAD | TCGA-A6-5656-01A | A |
| COAD | TCGA-G4-6302-01A | B |
| COAD | TCGA-AA-A01R-01A | A |
| COAD | TCGA-AA-3712-01A | B |

|      |                  |   |
|------|------------------|---|
| COAD | TCGA-CA-6716-01A | A |
| COAD | TCGA-AA-3864-01A | A |
| COAD | TCGA-AA-3975-01A | B |
| COAD | TCGA-D5-6534-01A | B |
| COAD | TCGA-5M-AATE-01A | A |
| COAD | TCGA-A6-5667-01A | A |
| COAD | TCGA-A6-6652-01A | A |
| COAD | TCGA-AA-3971-01A | B |
| COAD | TCGA-CM-6680-01A | B |
| COAD | TCGA-A6-6141-01A | B |
| COAD | TCGA-AA-3494-01A | A |
| COAD | TCGA-AA-A00A-01A | A |
| GBM  | TCGA-27-2521-01A | B |
| GBM  | TCGA-19-0957-02A | A |
| GBM  | TCGA-26-5139-01A | B |
| GBM  | TCGA-19-2620-01A | B |
| GBM  | TCGA-02-2483-01A | B |
| GBM  | TCGA-28-2499-01A | B |
| GBM  | TCGA-14-1034-02B | B |
| GBM  | TCGA-06-0174-01A | A |
| GBM  | TCGA-06-0125-02A | B |
| GBM  | TCGA-06-0238-01A | A |
| GBM  | TCGA-76-4928-01B | B |
| GBM  | TCGA-14-1825-01A | B |
| GBM  | TCGA-76-4927-01A | B |
| GBM  | TCGA-14-1034-01A | B |
| GBM  | TCGA-06-0747-01A | B |
| GBM  | TCGA-06-0130-01A | B |
| GBM  | TCGA-06-0125-01A | B |
| GBM  | TCGA-28-2514-01A | A |
| GBM  | TCGA-06-0158-01A | B |
| GBM  | TCGA-06-0139-01A | B |
| GBM  | TCGA-76-4925-01A | B |
| GBM  | TCGA-19-2629-01A | B |
| GBM  | TCGA-06-0743-01A | B |
| GBM  | TCGA-06-5412-01A | B |
| GBM  | TCGA-28-5207-01A | A |
| GBM  | TCGA-28-5204-01A | B |
| GBM  | TCGA-14-0781-01B | B |
| GBM  | TCGA-27-1832-01A | B |
| GBM  | TCGA-06-5408-01A | B |
| GBM  | TCGA-32-2632-01A | B |
| GBM  | TCGA-06-2557-01A | B |
| GBM  | TCGA-76-4931-01A | B |
| GBM  | TCGA-06-2565-01A | B |
| GBM  | TCGA-19-5960-01A | A |
| GBM  | TCGA-06-5411-01A | A |

|     |                  |   |
|-----|------------------|---|
| GBM | TCGA-06-0745-01A | B |
| GBM | TCGA-41-5651-01A | A |
| GBM | TCGA-41-2571-01A | A |
| GBM | TCGA-28-1753-01A | B |
| GBM | TCGA-27-1830-01A | B |
| GBM | TCGA-12-3653-01A | B |
| GBM | TCGA-28-5218-01A | B |
| GBM | TCGA-19-1389-02A | B |
| GBM | TCGA-06-2559-01A | A |
| GBM | TCGA-26-5133-01A | B |
| GBM | TCGA-06-0168-01A | A |
| GBM | TCGA-19-2619-01A | B |
| GBM | TCGA-26-5132-01A | B |
| GBM | TCGA-06-0686-01A | A |
| GBM | TCGA-28-5215-01A | B |
| GBM | TCGA-06-0210-01A | B |
| GBM | TCGA-06-1804-01A | B |
| GBM | TCGA-06-0190-01A | B |
| GBM | TCGA-14-2554-01A | B |
| GBM | TCGA-06-0882-01A | B |
| GBM | TCGA-41-3915-01A | B |
| GBM | TCGA-32-5222-01A | B |
| GBM | TCGA-14-1402-02A | B |
| GBM | TCGA-06-0184-01A | B |
| GBM | TCGA-26-5134-01A | A |
| GBM | TCGA-06-5859-01A | B |
| GBM | TCGA-27-1831-01A | B |
| GBM | TCGA-02-0047-01A | A |
| GBM | TCGA-06-5413-01A | B |
| GBM | TCGA-28-5213-01A | B |
| GBM | TCGA-06-0649-01B | B |
| GBM | TCGA-14-0790-01B | B |
| GBM | TCGA-26-1442-01A | A |
| GBM | TCGA-06-2569-01A | B |
| GBM | TCGA-06-0132-01A | A |
| GBM | TCGA-28-2509-01A | B |
| GBM | TCGA-14-1829-01A | B |
| GBM | TCGA-06-2561-01A | B |
| GBM | TCGA-28-5209-01A | B |
| GBM | TCGA-27-1835-01A | B |
| GBM | TCGA-28-1747-01C | B |
| GBM | TCGA-26-5135-01A | B |
| GBM | TCGA-32-1982-01A | B |
| GBM | TCGA-06-0129-01A | B |
| GBM | TCGA-14-1823-01A | B |
| GBM | TCGA-76-4932-01A | B |
| GBM | TCGA-27-1837-01A | B |

|     |                  |   |
|-----|------------------|---|
| GBM | TCGA-06-0178-01A | A |
| GBM | TCGA-32-2615-01A | B |
| GBM | TCGA-06-0187-01A | B |
| GBM | TCGA-06-0219-01A | B |
| GBM | TCGA-06-2567-01A | B |
| GBM | TCGA-06-5858-01A | B |
| GBM | TCGA-12-5299-01A | B |
| GBM | TCGA-27-2524-01A | B |
| GBM | TCGA-06-5414-01A | B |
| GBM | TCGA-12-5295-01A | B |
| GBM | TCGA-28-5208-01A | B |
| GBM | TCGA-32-1970-01A | B |
| GBM | TCGA-06-0171-02A | B |
| GBM | TCGA-06-2558-01A | A |
| GBM | TCGA-19-2624-01A | A |
| GBM | TCGA-12-3650-01A | B |
| GBM | TCGA-06-2564-01A | B |
| GBM | TCGA-06-0644-01A | B |
| GBM | TCGA-27-2523-01A | B |
| GBM | TCGA-28-5216-01A | A |
| GBM | TCGA-06-5416-01A | A |
| GBM | TCGA-32-2638-01A | B |
| GBM | TCGA-12-3652-01A | B |
| GBM | TCGA-12-0618-01A | A |
| GBM | TCGA-14-0789-01A | B |
| GBM | TCGA-27-2528-01A | B |
| GBM | TCGA-08-0386-01A | B |
| GBM | TCGA-32-1980-01A | A |
| GBM | TCGA-12-1597-01B | A |
| GBM | TCGA-06-0646-01A | A |
| GBM | TCGA-06-0221-02A | A |
| GBM | TCGA-14-0871-01A | B |
| GBM | TCGA-19-1787-01B | B |
| GBM | TCGA-06-0152-02A | B |
| GBM | TCGA-14-0787-01A | B |
| GBM | TCGA-06-5417-01A | B |
| GBM | TCGA-02-0055-01A | B |
| GBM | TCGA-12-0619-01A | B |
| GBM | TCGA-28-5220-01A | B |
| GBM | TCGA-12-0616-01A | B |
| GBM | TCGA-32-2616-01A | B |
| GBM | TCGA-27-2526-01A | B |
| GBM | TCGA-19-4065-01A | B |
| GBM | TCGA-76-4926-01B | B |
| GBM | TCGA-14-0736-02A | A |
| GBM | TCGA-06-0141-01A | B |
| GBM | TCGA-16-1045-01B | B |

|      |                  |   |
|------|------------------|---|
| GBM  | TCGA-32-2634-01A | A |
| GBM  | TCGA-41-2572-01A | B |
| GBM  | TCGA-28-2510-01A | A |
| GBM  | TCGA-02-2485-01A | B |
| GBM  | TCGA-16-0846-01A | A |
| GBM  | TCGA-06-5856-01A | B |
| GBM  | TCGA-14-0817-01A | B |
| GBM  | TCGA-19-1390-01A | B |
| GBM  | TCGA-06-0157-01A | B |
| GBM  | TCGA-06-0190-02A | B |
| GBM  | TCGA-12-0821-01A | A |
| GBM  | TCGA-06-0750-01A | B |
| GBM  | TCGA-06-0156-01A | B |
| GBM  | TCGA-06-0156-01A | B |
| GBM  | TCGA-28-2513-01A | B |
| GBM  | TCGA-02-2486-01A | B |
| GBM  | TCGA-27-1834-01A | A |
| GBM  | TCGA-06-0744-01A | B |
| GBM  | TCGA-32-4213-01A | B |
| GBM  | TCGA-06-5410-01A | B |
| GBM  | TCGA-06-2563-01A | B |
| GBM  | TCGA-06-0749-01A | A |
| GBM  | TCGA-19-4065-02A | A |
| GBM  | TCGA-19-2625-01A | B |
| GBM  | TCGA-06-5418-01A | B |
| GBM  | TCGA-41-4097-01A | A |
| GBM  | TCGA-06-0211-01B | B |
| GBM  | TCGA-06-0138-01A | A |
| GBM  | TCGA-06-0878-01A | B |
| GBM  | TCGA-06-0645-01A | B |
| GBM  | TCGA-27-2519-01A | B |
| GBM  | TCGA-26-5136-01B | B |
| GBM  | TCGA-06-2570-01A | A |
| GBM  | TCGA-15-0742-01A | B |
| GBM  | TCGA-15-1444-01A | B |
| GBM  | TCGA-06-0211-02A | B |
| GBM  | TCGA-76-4929-01A | B |
| GBM  | TCGA-06-0210-02A | B |
| GBM  | TCGA-06-2562-01A | B |
| GBM  | TCGA-06-0211-01A | B |
| KIRP | TCGA-GL-A4EM-01A | B |
| KIRP | TCGA-A4-7584-01A | A |
| KIRP | TCGA-IZ-8195-01A | A |
| KIRP | TCGA-HE-7129-01A | A |
| KIRP | TCGA-IA-A40U-01A | B |
| KIRP | TCGA-B9-4116-01A | B |
| KIRP | TCGA-B9-4115-01A | A |

|      |                  |   |
|------|------------------|---|
| KIRP | TCGA-P4-A5EA-01A | B |
| KIRP | TCGA-BQ-7062-01A | A |
| KIRP | TCGA-HE-7128-01A | B |
| KIRP | TCGA-B9-4617-01A | A |
| KIRP | TCGA-DW-7839-01A | B |
| KIRP | TCGA-AL-A5DJ-01A | B |
| KIRP | TCGA-UZ-A9PV-01A | A |
| KIRP | TCGA-V9-A7HT-01A | B |
| KIRP | TCGA-AL-3466-01A | B |
| KIRP | TCGA-B9-A69E-01A | B |
| KIRP | TCGA-BQ-5875-01A | B |
| KIRP | TCGA-GL-7966-01A | B |
| KIRP | TCGA-UZ-A9Q0-01A | A |
| KIRP | TCGA-2Z-A9J8-01A | A |
| KIRP | TCGA-5P-A9JW-01A | A |
| KIRP | TCGA-BQ-5887-01A | B |
| KIRP | TCGA-BQ-7050-01A | A |
| KIRP | TCGA-2Z-A9J3-01A | A |
| KIRP | TCGA-A4-A57E-01A | A |
| KIRP | TCGA-B9-A44B-01A | A |
| KIRP | TCGA-UZ-A9PN-01A | B |
| KIRP | TCGA-UZ-A9PM-01A | B |
| KIRP | TCGA-DW-7834-01A | A |
| KIRP | TCGA-DW-5561-01A | A |
| KIRP | TCGA-BQ-7046-01A | A |
| KIRP | TCGA-UN-AAZ9-01A | B |
| KIRP | TCGA-SX-A71R-01A | A |
| KIRP | TCGA-UZ-A9Q1-01A | A |
| KIRP | TCGA-G7-A8LE-01A | B |
| KIRP | TCGA-A4-A5Y0-01A | A |
| KIRP | TCGA-BQ-7045-01A | B |
| KIRP | TCGA-SX-A7SO-01A | A |
| KIRP | TCGA-G7-6796-01A | A |
| KIRP | TCGA-B1-7332-01A | A |
| KIRP | TCGA-IZ-A6M8-01A | A |
| KIRP | TCGA-5P-A9K2-01A | A |
| KIRP | TCGA-5P-A9K4-01A | B |
| KIRP | TCGA-2Z-A9JE-01A | A |
| KIRP | TCGA-UZ-A9PS-05A | A |
| KIRP | TCGA-5P-A9K9-01A | B |
| KIRP | TCGA-B1-A656-01A | B |
| KIRP | TCGA-Y8-A894-01A | A |
| KIRP | TCGA-2Z-A9J2-01A | A |
| KIRP | TCGA-A4-A5Y1-01A | A |
| KIRP | TCGA-AL-3472-01A | A |
| KIRP | TCGA-SX-A7SL-01A | A |
| KIRP | TCGA-DW-7838-01A | B |

|      |                  |   |
|------|------------------|---|
| KIRP | TCGA-B3-4104-01A | B |
| KIRP | TCGA-B1-A47O-01A | B |
| KIRP | TCGA-PJ-A5Z9-01A | A |
| KIRP | TCGA-HE-A5NL-01A | A |
| KIRP | TCGA-DW-7837-01A | A |
| KIRP | TCGA-A4-8311-01A | A |
| KIRP | TCGA-A4-A4ZT-01A | A |
| KIRP | TCGA-EV-5902-01A | A |
| KIRP | TCGA-B9-A5W9-01A | A |
| KIRP | TCGA-IA-A83S-01A | A |
| KIRP | TCGA-DW-7841-01A | B |
| KIRP | TCGA-A4-A6HP-01A | A |
| KIRP | TCGA-B3-3925-01A | B |
| KIRP | TCGA-AL-3467-01A | B |
| KIRP | TCGA-UZ-A9PR-01A | A |
| KIRP | TCGA-F9-A7Q0-01A | B |
| KIRP | TCGA-MH-A55W-01A | A |
| KIRP | TCGA-B9-5155-01A | A |
| KIRP | TCGA-G7-A8LB-01A | A |
| KIRP | TCGA-BQ-5883-01A | B |
| KIRP | TCGA-HE-A5NJ-01A | A |
| KIRP | TCGA-DW-7840-01A | A |
| KIRP | TCGA-SX-A7SM-01A | A |
| KIRP | TCGA-BQ-5889-01A | B |
| KIRP | TCGA-B9-4117-01A | B |
| KIRP | TCGA-Y8-A895-01A | A |
| KIRP | TCGA-Y8-A896-01A | B |
| KIRP | TCGA-5P-A9JV-01A | A |
| KIRP | TCGA-BQ-7044-01A | B |
| KIRP | TCGA-UZ-A9PS-01A | A |
| KIRP | TCGA-GL-6846-01A | A |
| KIRP | TCGA-G7-7502-01A | B |
| KIRP | TCGA-SX-A7SU-01A | A |
| KIRP | TCGA-AL-3468-01A | A |
| KIRP | TCGA-IZ-8196-01A | A |
| KIRP | TCGA-5P-A9K6-01A | A |
| KIRP | TCGA-2Z-A9JS-01A | A |
| KIRP | TCGA-BQ-7053-01A | B |
| KIRP | TCGA-4A-A93X-01A | A |
| KIRP | TCGA-5P-A9KC-01A | A |
| KIRP | TCGA-J7-6720-01A | B |
| KIRP | TCGA-2Z-A9JL-01A | B |
| KIRP | TCGA-AT-A5NU-01A | B |
| KIRP | TCGA-BQ-5890-01A | A |
| KIRP | TCGA-J7-A8I2-01A | B |
| KIRP | TCGA-SX-A71S-01A | A |
| KIRP | TCGA-AL-3471-01A | A |

|      |                  |   |
|------|------------------|---|
| KIRP | TCGA-B1-A47N-01A | A |
| KIRP | TCGA-A4-8516-01A | A |
| KIRP | TCGA-UZ-A9PX-01A | A |
| KIRP | TCGA-B9-5156-01A | A |
| KIRP | TCGA-DW-7836-01A | A |
| KIRP | TCGA-5P-A9KF-01A | A |
| KIRP | TCGA-P4-A5E7-01A | B |
| KIRP | TCGA-IA-A83V-01A | B |
| KIRP | TCGA-BQ-7058-01A | A |
| KIRP | TCGA-A4-8098-01A | A |
| KIRP | TCGA-BQ-5879-01A | B |
| KIRP | TCGA-MH-A855-01A | B |
| KIRP | TCGA-4A-A93W-01A | B |
| KIRP | TCGA-2Z-A9JN-01A | B |
| KIRP | TCGA-SX-A7SS-01A | A |
| KIRP | TCGA-A4-A7UZ-01A | B |
| KIRP | TCGA-Y8-A898-01A | A |
| KIRP | TCGA-IA-A40X-01A | A |
| KIRP | TCGA-HE-A5NK-01A | B |
| KIRP | TCGA-BQ-5882-01A | B |
| KIRP | TCGA-SX-A7SQ-01A | B |
| KIRP | TCGA-P4-AAVL-01A | A |
| KIRP | TCGA-MH-A856-01A | B |
| KIRP | TCGA-B9-A8YI-01A | A |
| KIRP | TCGA-2Z-A9JJ-01A | B |
| KIRP | TCGA-O9-A75Z-01A | A |
| KIRP | TCGA-PJ-A5Z8-01A | B |
| KIRP | TCGA-A4-8312-01A | B |
| KIRP | TCGA-EV-5901-01A | B |
| KIRP | TCGA-5P-A9KA-01A | B |
| KIRP | TCGA-BQ-5893-01A | B |
| KIRP | TCGA-2Z-A9JP-01A | A |
| KIRP | TCGA-5P-A9KH-01A | B |
| KIRP | TCGA-DZ-6135-01A | B |
| KIRP | TCGA-GL-A59R-01A | A |
| KIRP | TCGA-A4-7583-01A | A |
| KIRP | TCGA-KV-A6GD-01A | B |
| KIRP | TCGA-A4-7287-01A | B |
| KIRP | TCGA-B9-A8YH-01A | A |
| KIRP | TCGA-DW-5560-01A | A |
| KIRP | TCGA-2Z-A9JM-01A | A |
| KIRP | TCGA-5P-A9JY-01A | A |
| KIRP | TCGA-P4-AAVO-01A | A |
| KIRP | TCGA-BQ-5880-01A | B |
| KIRP | TCGA-BQ-7061-01A | A |
| KIRP | TCGA-G7-6793-01A | B |
| KIRP | TCGA-A4-7732-01A | A |

|      |                  |   |
|------|------------------|---|
| KIRP | TCGA-B1-A654-01A | B |
| KIRP | TCGA-A4-8517-01A | A |
| KIRP | TCGA-BQ-5888-01A | B |
| KIRP | TCGA-IA-A83T-01A | B |
| KIRP | TCGA-WN-AB4C-01A | A |
| KIRP | TCGA-2Z-A9J1-01A | B |
| KIRP | TCGA-GL-7773-01A | B |
| KIRP | TCGA-5P-A9KE-01A | A |
| KIRP | TCGA-5P-A9K0-01A | A |
| KIRP | TCGA-B1-5398-01A | B |
| KIRP | TCGA-Y8-A897-01A | A |
| KIRP | TCGA-B1-A47M-01A | B |
| KIRP | TCGA-DW-7963-01B | A |
| KIRP | TCGA-B3-8121-01A | B |
| KIRP | TCGA-KV-A6GE-01A | A |
| KIRP | TCGA-P4-AAVK-01A | A |
| KIRP | TCGA-A4-A772-01A | A |
| KIRP | TCGA-UZ-A9PZ-01A | A |
| KIRP | TCGA-HE-A5NF-01A | B |
| KIRP | TCGA-G7-A8LD-01A | B |
| KIRP | TCGA-SX-A7SR-01A | A |
| KIRP | TCGA-A4-8630-01A | A |
| KIRP | TCGA-MH-A562-01A | A |
| KIRP | TCGA-MH-A561-01A | B |
| KIRP | TCGA-B9-A5W7-01A | A |
| KIRP | TCGA-HE-A5NI-01A | A |
| KIRP | TCGA-A4-7996-01A | A |
| KIRP | TCGA-BQ-5876-01A | A |
| KIRP | TCGA-2Z-A9J9-01A | B |
| KIRP | TCGA-2Z-A9JD-01A | A |
| KIRP | TCGA-2Z-A9JQ-01A | A |
| KIRP | TCGA-B3-A6W5-01A | A |
| KIRP | TCGA-BQ-7048-01A | B |
| KIRP | TCGA-WN-A9G9-01A | A |
| KIRP | TCGA-A4-7286-01A | B |
| KIRP | TCGA-MH-A560-01A | A |
| KIRP | TCGA-BQ-7049-01A | B |
| KIRP | TCGA-5P-A9JZ-01A | A |
| KIRP | TCGA-P4-AAVM-01A | A |
| KIRP | TCGA-A4-8310-01A | A |
| KIRP | TCGA-UZ-A9PU-01A | A |
| KIRP | TCGA-A4-7828-01A | B |
| KIRP | TCGA-P4-A5E6-01A | A |
| KIRP | TCGA-BQ-5886-01A | A |
| KIRP | TCGA-SX-A71W-01A | A |
| KIRP | TCGA-BQ-5881-01A | A |
| KIRP | TCGA-UZ-A9PL-01A | A |

|      |                  |   |
|------|------------------|---|
| KIRP | TCGA-A4-8515-01A | A |
| KIRP | TCGA-P4-A5EB-01A | A |
| KIRP | TCGA-BQ-7060-01A | A |
| KIRP | TCGA-UZ-A9PK-01A | A |
| KIRP | TCGA-A4-A5XZ-01A | A |
| KIRP | TCGA-5P-A9K8-01A | B |
| KIRP | TCGA-G7-6795-01A | A |
| KIRP | TCGA-BQ-5878-01A | A |
| KIRP | TCGA-G7-6790-01A | A |
| KIRP | TCGA-SX-A7SN-01A | A |
| KIRP | TCGA-BQ-5885-01A | A |
| KIRP | TCGA-BQ-7055-01A | B |
| KIRP | TCGA-EV-5903-01A | B |
| KIRP | TCGA-F9-A97G-01A | B |
| KIRP | TCGA-MH-A854-01A | B |
| KIRP | TCGA-DZ-6134-01A | B |
| KIRP | TCGA-B9-A5W8-01A | B |
| KIRP | TCGA-GL-A9DC-01A | A |
| KIRP | TCGA-4A-A93Y-01A | B |
| KIRP | TCGA-G7-6789-01A | B |
| KIRP | TCGA-G7-6797-01A | A |
| KIRP | TCGA-SX-A71U-01A | A |
| KIRP | TCGA-P4-A5ED-01A | B |
| KIRP | TCGA-A4-7997-01A | A |
| KIRP | TCGA-G7-A8LC-01A | A |
| KIRP | TCGA-G7-7501-01A | A |
| KIRP | TCGA-B3-4103-01A | A |
| KIRP | TCGA-A4-A5DU-01A | A |
| KIRP | TCGA-DZ-6133-01A | A |
| KIRP | TCGA-KV-A74V-01A | A |
| KIRP | TCGA-A4-7734-01A | B |
| KIRP | TCGA-G7-6792-01A | B |
| KIRP | TCGA-BQ-5892-01A | A |
| KIRP | TCGA-AL-7173-01A | B |
| KIRP | TCGA-BQ-5884-01A | B |
| KIRP | TCGA-IA-A83W-01A | B |
| KIRP | TCGA-Q2-A5QZ-01A | B |
| KIRP | TCGA-BQ-7056-01A | A |
| KIRP | TCGA-A4-A48D-01A | A |
| KIRP | TCGA-GL-A59T-01A | A |
| KIRP | TCGA-UZ-A9PP-01A | A |
| KIRP | TCGA-B1-A657-01A | A |
| KIRP | TCGA-Y8-A8RZ-01A | A |
| KIRP | TCGA-2Z-A9JO-01A | B |
| KIRP | TCGA-5P-A9K3-01A | A |
| KIRP | TCGA-B9-4113-01A | B |
| KIRP | TCGA-G7-A4TM-01A | B |

|      |                  |   |
|------|------------------|---|
| KIRP | TCGA-SX-A7SP-01A | A |
| KIRP | TCGA-BQ-5877-01A | B |
| KIRP | TCGA-F9-A8NY-01A | B |
| KIRP | TCGA-BQ-7059-01A | B |
| KIRP | TCGA-2K-A9WE-01A | B |
| KIRP | TCGA-UZ-A9PQ-01A | A |
| KIRP | TCGA-2Z-A9J5-01A | B |
| KIRP | TCGA-A4-7288-01A | A |
| KIRP | TCGA-Y8-A8S1-01A | B |
| KIRP | TCGA-GL-A9DD-01A | B |
| KIRP | TCGA-B3-3926-01A | A |
| KIRP | TCGA-HE-A5NH-01A | A |
| KIRP | TCGA-UZ-A9PJ-01A | A |
| KIRP | TCGA-F9-A7VF-01A | A |
| KIRP | TCGA-A4-8518-01A | A |
| KIRP | TCGA-HE-7130-01A | B |
| KIRP | TCGA-2Z-A9J7-01A | A |
| KIRP | TCGA-Y8-A8S0-01A | A |
| KIRP | TCGA-A4-7915-01A | B |
| KIRP | TCGA-DZ-6132-01A | B |
| KIRP | TCGA-MH-A55Z-01A | A |
| KIRP | TCGA-DW-7842-01A | A |
| KIRP | TCGA-B9-7268-01A | A |
| KIRP | TCGA-P4-A5E8-01A | B |
| KIRP | TCGA-2Z-A9JT-01A | A |
| KIRP | TCGA-GL-A9DE-01A | A |
| KIRP | TCGA-2Z-A9JR-01A | A |
| KIRP | TCGA-IA-A40Y-01A | B |
| KIRP | TCGA-UZ-A9PO-01A | A |
| KIRP | TCGA-F9-A4JJ-01A | B |
| KIRP | TCGA-2Z-A9JK-01A | B |
| KIRP | TCGA-Y8-A8RY-01A | A |
| KIRP | TCGA-J7-8537-01A | B |
| KIRP | TCGA-BQ-7051-01A | A |
| KIRP | TCGA-5P-A9JU-01A | A |
| KIRP | TCGA-2Z-A9JG-01A | B |
| KIRP | TCGA-AL-3473-01A | A |
| KIRP | TCGA-B1-A655-01A | A |
| KIRP | TCGA-BQ-5894-01A | B |
| KIRP | TCGA-IZ-A6M9-01A | A |
| KIRP | TCGA-A4-7585-01A | B |
| KIRP | TCGA-2Z-A9J6-01A | A |
| KIRP | TCGA-SX-A71V-01A | A |
| KIRP | TCGA-2Z-A9JI-01A | B |
| KIRP | TCGA-MH-A857-01A | B |
| KIRP | TCGA-GL-8500-01A | A |
| KIRP | TCGA-BQ-5891-01A | A |

|      |                  |   |
|------|------------------|---|
| PAAD | TCGA-IB-7646-01A | B |
| PAAD | TCGA-IB-A5SQ-01A | B |
| PAAD | TCGA-S4-A8RP-01A | B |
| PAAD | TCGA-H6-8124-01A | B |
| PAAD | TCGA-HZ-8317-01A | B |
| PAAD | TCGA-F2-A8YN-01A | B |
| PAAD | TCGA-IB-AAUN-01A | B |
| PAAD | TCGA-FB-AAQ0-01A | B |
| PAAD | TCGA-HZ-8638-01A | B |
| PAAD | TCGA-US-A77G-01A | B |
| PAAD | TCGA-HZ-A49I-01A | B |
| PAAD | TCGA-IB-7649-01A | B |
| PAAD | TCGA-IB-A7LX-01A | B |
| PAAD | TCGA-RL-AAAS-01A | B |
| PAAD | TCGA-2J-AABI-01A | B |
| PAAD | TCGA-IB-A6UG-01A | B |
| PAAD | TCGA-IB-7893-01A | B |
| PAAD | TCGA-2L-AAQL-01A | B |
| PAAD | TCGA-FB-AAPY-01A | B |
| PAAD | TCGA-FB-A545-01A | B |
| PAAD | TCGA-IB-A6UF-01A | B |
| PAAD | TCGA-IB-7889-01A | B |
| PAAD | TCGA-3A-A9IC-01A | B |
| PAAD | TCGA-IB-AAUT-01A | B |
| PAAD | TCGA-HV-AA8X-01A | B |
| PAAD | TCGA-IB-7651-01A | B |
| PAAD | TCGA-2J-AABA-01A | B |
| PAAD | TCGA-Z5-AAPL-01A | B |
| PAAD | TCGA-2L-AAQA-01A | B |
| PAAD | TCGA-H6-A45N-01A | B |
| PAAD | TCGA-IB-AAUV-01A | B |
| PAAD | TCGA-3E-AAAY-01A | B |
| PAAD | TCGA-IB-7644-01A | B |
| PAAD | TCGA-YY-A8LH-01A | B |
| PAAD | TCGA-LB-A8F3-01A | B |
| PAAD | TCGA-HZ-8315-01A | B |
| PAAD | TCGA-IB-AAUP-01A | B |
| PAAD | TCGA-FB-A78T-01A | B |
| PAAD | TCGA-IB-AAUU-01A | B |
| PAAD | TCGA-2L-AAQJ-01A | B |
| PAAD | TCGA-M8-A5N4-01A | B |
| PAAD | TCGA-RB-A7B8-01A | B |
| PAAD | TCGA-IB-A5SP-01A | B |
| PAAD | TCGA-S4-A8RO-01A | B |
| PAAD | TCGA-3A-A9IV-01A | A |
| PAAD | TCGA-FB-AAPQ-01A | B |
| PAAD | TCGA-IB-A5SO-01A | B |

|      |                  |   |
|------|------------------|---|
| PAAD | TCGA-IB-7652-01A | B |
| PAAD | TCGA-3A-A9IX-01A | B |
| PAAD | TCGA-HZ-A8P1-01A | B |
| PAAD | TCGA-FB-AAPZ-01A | B |
| PAAD | TCGA-XN-A8T5-01A | B |
| PAAD | TCGA-2J-AAB1-01A | B |
| PAAD | TCGA-IB-7885-01A | B |
| PAAD | TCGA-2J-AABH-01A | B |
| PAAD | TCGA-2J-AABO-01A | B |
| PAAD | TCGA-3A-A9J0-01A | B |
| PAAD | TCGA-IB-7888-01A | B |
| PAAD | TCGA-F2-6880-01A | B |
| PAAD | TCGA-HZ-A49H-01A | B |
| PAAD | TCGA-F2-6879-01A | B |
| PAAD | TCGA-IB-A7M4-01A | B |
| PAAD | TCGA-HZ-8002-01A | B |
| PAAD | TCGA-2J-AAB8-01A | B |
| PAAD | TCGA-FB-AAQ6-01A | B |
| PAAD | TCGA-XN-A8T3-01A | B |
| PAAD | TCGA-2J-AABR-01A | B |
| PAAD | TCGA-FB-AAPS-01A | B |
| PAAD | TCGA-HZ-8519-01A | B |
| PAAD | TCGA-HV-A5A6-01A | B |
| PAAD | TCGA-2J-AABK-01A | B |
| PAAD | TCGA-HZ-A77Q-01A | B |
| PAAD | TCGA-HV-AA8V-01A | B |
| PAAD | TCGA-3A-A9IO-01A | A |
| PAAD | TCGA-HZ-7926-01A | B |
| PAAD | TCGA-HZ-7924-01A | B |
| PAAD | TCGA-2J-AABP-01A | B |
| PAAD | TCGA-US-A774-01A | B |
| PAAD | TCGA-XD-AAUL-01A | B |
| PAAD | TCGA-2L-AAQM-01A | A |
| PAAD | TCGA-FB-A4P6-01A | B |
| PAAD | TCGA-2J-AABV-01A | B |
| PAAD | TCGA-3A-A9IB-01A | B |
| PAAD | TCGA-IB-A5ST-01A | B |
| PAAD | TCGA-FB-A4P5-01A | B |
| PAAD | TCGA-IB-AAUR-01A | B |
| PAAD | TCGA-HZ-7289-01A | B |
| PAAD | TCGA-FB-AAQ1-01A | B |
| PAAD | TCGA-F2-A44G-01A | B |
| PAAD | TCGA-US-A77J-01A | B |
| PAAD | TCGA-IB-7645-01A | B |
| PAAD | TCGA-HV-A7OL-01A | B |
| PAAD | TCGA-FB-AAPU-01A | B |
| PAAD | TCGA-PZ-A5RE-01A | B |

|      |                  |   |
|------|------------------|---|
| PAAD | TCGA-HZ-7920-01A | B |
| PAAD | TCGA-IB-7887-01A | B |
| PAAD | TCGA-HZ-A77P-01A | B |
| PAAD | TCGA-US-A77E-01A | B |
| PAAD | TCGA-2L-AAQI-01A | B |
| PAAD | TCGA-3A-A9I7-01A | B |
| PAAD | TCGA-FB-A5VM-01A | B |
| PAAD | TCGA-2J-AAB6-01A | B |
| PAAD | TCGA-3A-A9IU-01A | B |
| PAAD | TCGA-F2-7276-01A | B |
| PAAD | TCGA-F2-A44H-01A | B |
| PAAD | TCGA-2J-AABE-01A | B |
| PAAD | TCGA-HV-A5A3-01A | B |
| PAAD | TCGA-HZ-8637-01A | B |
| PAAD | TCGA-F2-A7TX-01A | B |
| PAAD | TCGA-IB-7891-01A | B |
| PAAD | TCGA-IB-7897-01A | B |
| PAAD | TCGA-HZ-A9TJ-06A | B |
| PAAD | TCGA-3A-A9IJ-01A | A |
| PAAD | TCGA-IB-AAUS-01A | B |
| PAAD | TCGA-IB-8127-01A | B |
| PAAD | TCGA-HZ-A4BH-01A | B |
| PAAD | TCGA-HZ-8001-01A | B |
| PAAD | TCGA-3A-A9IN-01A | A |
| PAAD | TCGA-3E-AAAZ-01A | B |
| PAAD | TCGA-LB-A9Q5-01A | B |
| PAAD | TCGA-FB-AAPP-01A | B |
| PAAD | TCGA-US-A776-01A | B |
| PAAD | TCGA-HZ-7922-01A | B |
| PAAD | TCGA-3A-A9IZ-01A | B |
| PAAD | TCGA-IB-AAUW-01A | B |
| PAAD | TCGA-HZ-8005-01A | B |
| PAAD | TCGA-2J-AAB4-01A | B |
| PAAD | TCGA-XD-AAUH-01A | B |
| PAAD | TCGA-2J-AABT-01A | B |
| PAAD | TCGA-IB-A5SS-01A | B |
| PAAD | TCGA-S4-A8RM-01A | B |
| PAAD | TCGA-FB-AAQ2-01A | B |
| PAAD | TCGA-F2-7273-01A | B |
| PAAD | TCGA-IB-8126-01A | B |
| PAAD | TCGA-XD-AAUG-01A | B |
| PAAD | TCGA-HV-A7OP-01A | B |
| PAAD | TCGA-XD-AAUI-01A | B |
| PAAD | TCGA-HV-A5A4-01A | B |
| PAAD | TCGA-H8-A6C1-01A | B |
| PAAD | TCGA-HV-A5A5-01A | B |
| PAAD | TCGA-OE-A75W-01A | B |

|      |                  |   |
|------|------------------|---|
| PAAD | TCGA-US-A779-01A | B |
| PAAD | TCGA-RB-AA9M-01A | B |
| PAAD | TCGA-IB-7886-01A | B |
| PAAD | TCGA-IB-AAUO-01A | B |
| PAAD | TCGA-2J-AABU-01A | B |
| PAAD | TCGA-HZ-8636-01A | B |
| PAAD | TCGA-HZ-A9TJ-01A | B |
| PAAD | TCGA-LB-A7SX-01A | B |
| PAAD | TCGA-IB-7890-01A | B |
| PAAD | TCGA-HZ-A49G-01A | B |
| PAAD | TCGA-3A-A9IL-01A | A |
| PAAD | TCGA-YB-A89D-01A | B |
| PAAD | TCGA-HZ-7925-01A | B |
| PAAD | TCGA-3A-A9IS-01A | A |
| PAAD | TCGA-2J-AAB9-01A | B |
| PAAD | TCGA-3A-A9IH-01A | B |
| PAAD | TCGA-IB-7654-01A | B |
| PAAD | TCGA-HZ-8003-01A | B |
| PAAD | TCGA-FB-AAQ3-01A | B |
| PAAD | TCGA-2J-AABF-01A | B |
| PAAD | TCGA-YH-A8SY-01A | B |
| PAAD | TCGA-HZ-A4BK-01A | B |
| PAAD | TCGA-3A-A9I5-01A | B |
| PAAD | TCGA-Q3-A5QY-01A | B |
| PAAD | TCGA-HZ-7918-01A | B |
| PAAD | TCGA-3A-A9I9-01A | B |
| PAAD | TCGA-2L-AAQE-01A | B |
| PAAD | TCGA-HZ-A77O-01A | B |
| PAAD | TCGA-L1-A7W4-01A | B |
| PAAD | TCGA-HZ-7923-01A | B |
| PAAD | TCGA-HZ-7919-01A | B |
| PAAD | TCGA-Q3-AA2A-01A | B |
| PAAD | TCGA-IB-AAUM-01A | B |
| PAAD | TCGA-HZ-A8P0-01A | B |
| PAAD | TCGA-IB-AAUQ-01A | B |
| PAAD | TCGA-FB-A7DR-01A | B |
| PAAD | TCGA-3A-A9IR-01A | A |
| PCPG | TCGA-QR-A7IP-01A | A |
| PCPG | TCGA-QR-A7OI-01A | A |
| PCPG | TCGA-TT-A6YJ-01A | A |
| PCPG | TCGA-W2-A7H7-01A | A |
| PCPG | TCGA-S7-A7WX-01A | A |
| PCPG | TCGA-SR-A6MX-05A | A |
| PCPG | TCGA-SP-A6QF-01A | A |
| PCPG | TCGA-QR-A7OX-01A | B |
| PCPG | TCGA-WB-A80Y-01A | A |
| PCPG | TCGA-WB-A81N-01A | A |

|      |                  |   |
|------|------------------|---|
| PCPG | TCGA-QR-A70C-01A | A |
| PCPG | TCGA-TT-A6YP-01A | A |
| PCPG | TCGA-QT-A5XM-01A | A |
| PCPG | TCGA-PR-A5PG-01A | A |
| PCPG | TCGA-SP-A6QH-01A | A |
| PCPG | TCGA-P7-A5NX-01A | A |
| PCPG | TCGA-SR-A6N0-01A | B |
| PCPG | TCGA-SR-A6MS-01A | A |
| PCPG | TCGA-QR-A705-01A | A |
| PCPG | TCGA-RW-A8AZ-01A | A |
| PCPG | TCGA-RT-A6Y9-01A | A |
| PCPG | TCGA-W2-A7HF-01A | A |
| PCPG | TCGA-SP-A6QI-01A | A |
| PCPG | TCGA-QR-A70R-01A | A |
| PCPG | TCGA-WB-A81W-01A | A |
| PCPG | TCGA-WB-A80V-01A | A |
| PCPG | TCGA-QR-A707-01A | A |
| PCPG | TCGA-QR-A708-01A | A |
| PCPG | TCGA-SR-A6MR-01A | A |
| PCPG | TCGA-SP-A6QK-01A | B |
| PCPG | TCGA-QR-A6ZZ-01A | A |
| PCPG | TCGA-W2-A7HH-01A | A |
| PCPG | TCGA-WB-A818-01A | A |
| PCPG | TCGA-WB-A820-01A | A |
| PCPG | TCGA-RM-A68T-01A | A |
| PCPG | TCGA-SR-A6MU-01A | B |
| PCPG | TCGA-QR-A6GO-01A | A |
| PCPG | TCGA-QR-A6H2-01A | A |
| PCPG | TCGA-WB-A822-01A | A |
| PCPG | TCGA-QR-A6H6-01A | A |
| PCPG | TCGA-QR-A70M-01A | A |
| PCPG | TCGA-QR-A70N-01A | A |
| PCPG | TCGA-RW-A68G-01A | B |
| PCPG | TCGA-WB-A81H-01A | B |
| PCPG | TCGA-P7-A5NY-01A | A |
| PCPG | TCGA-QR-A706-01A | A |
| PCPG | TCGA-SR-A6MV-01A | A |
| PCPG | TCGA-WB-A81T-01A | B |
| PCPG | TCGA-WB-A80M-01A | A |
| PCPG | TCGA-SP-A6QG-01A | A |
| PCPG | TCGA-S7-A7WL-01A | A |
| PCPG | TCGA-WB-A81V-01A | A |
| PCPG | TCGA-WB-A816-01A | B |
| PCPG | TCGA-S7-A7WN-01A | A |
| PCPG | TCGA-W2-A7HD-01A | A |
| PCPG | TCGA-RX-A8JQ-01A | A |
| PCPG | TCGA-QR-A70W-01A | A |

|      |                  |   |
|------|------------------|---|
| PCPG | TCGA-QT-A5XP-01A | A |
| PCPG | TCGA-WB-A81G-01A | A |
| PCPG | TCGA-SR-A6MZ-01A | B |
| PCPG | TCGA-QR-A70H-01A | A |
| PCPG | TCGA-QR-A703-01A | A |
| PCPG | TCGA-S7-A7WV-01A | B |
| PCPG | TCGA-RW-A68A-01A | A |
| PCPG | TCGA-S7-A7WR-01A | A |
| PCPG | TCGA-RW-A68B-01A | A |
| PCPG | TCGA-WB-A80P-01A | A |
| PCPG | TCGA-W2-A7HA-01B | A |
| PCPG | TCGA-WB-A81F-01A | A |
| PCPG | TCGA-RW-A686-01A | A |
| PCPG | TCGA-QT-A5XN-01A | A |
| PCPG | TCGA-W2-A7HB-01A | A |
| PCPG | TCGA-S7-A7WW-01A | B |
| PCPG | TCGA-RW-A685-01A | B |
| PCPG | TCGA-QR-A6H5-01A | A |
| PCPG | TCGA-QR-A6H3-01A | A |
| PCPG | TCGA-QR-A6GY-01A | A |
| PCPG | TCGA-S7-A7X1-01A | A |
| PCPG | TCGA-WB-A819-01A | A |
| PCPG | TCGA-RW-A68F-01A | A |
| PCPG | TCGA-S7-A7X2-01A | A |
| PCPG | TCGA-W2-A7HC-01A | A |
| PCPG | TCGA-RW-A68C-01A | A |
| PCPG | TCGA-RW-A686-06A | A |
| PCPG | TCGA-QR-A6H4-01A | A |
| PCPG | TCGA-WB-A81D-01A | A |
| PCPG | TCGA-QT-A69Q-01A | A |
| PCPG | TCGA-RW-A688-01A | A |
| PCPG | TCGA-WB-A81P-01A | A |
| PCPG | TCGA-SR-A6MQ-01A | A |
| PCPG | TCGA-QR-A6GT-01A | A |
| PCPG | TCGA-SQ-A6I6-01A | A |
| PCPG | TCGA-QT-A5XL-01A | A |
| PCPG | TCGA-RW-A67W-01A | A |
| PCPG | TCGA-QR-A70D-01A | A |
| PCPG | TCGA-QR-A702-01A | A |
| PCPG | TCGA-WB-A81E-01A | A |
| PCPG | TCGA-QT-A7U0-01A | A |
| PCPG | TCGA-QR-A6GS-01A | A |
| PCPG | TCGA-RW-A67X-01A | A |
| PCPG | TCGA-TT-A6YK-01A | A |
| PCPG | TCGA-SQ-A6I4-01A | A |
| PCPG | TCGA-QR-A70T-01A | A |
| PCPG | TCGA-S7-A7WT-01A | A |

|      |                  |   |
|------|------------------|---|
| PCPG | TCGA-S7-A7X0-01A | A |
| PCPG | TCGA-WB-A815-01A | A |
| PCPG | TCGA-QT-A5XK-01A | A |
| PCPG | TCGA-QR-A6GZ-05A | A |
| PCPG | TCGA-P8-A5KC-01A | A |
| PCPG | TCGA-WB-A81A-01A | A |
| PCPG | TCGA-RM-A68W-01A | A |
| PCPG | TCGA-SR-A6MY-01A | A |
| PCPG | TCGA-QR-A70U-01A | A |
| PCPG | TCGA-W2-A7H5-01B | A |
| PCPG | TCGA-WB-A80Q-01A | A |
| PCPG | TCGA-RW-A7CZ-01A | A |
| PCPG | TCGA-RT-A6YA-01A | A |
| PCPG | TCGA-SR-A6MX-06A | A |
| PCPG | TCGA-RW-A7D0-01A | A |
| PCPG | TCGA-WB-A81Q-01A | A |
| PCPG | TCGA-WB-A80O-01A | A |
| PCPG | TCGA-QR-A70G-01B | B |
| PCPG | TCGA-SP-A6QC-01A | A |
| PCPG | TCGA-WB-A81J-01A | A |
| PCPG | TCGA-QR-A6GX-01A | A |
| PCPG | TCGA-P8-A5KD-01A | A |
| PCPG | TCGA-QR-A6GW-01A | A |
| PCPG | TCGA-SR-A6MX-01A | A |
| PCPG | TCGA-SP-A6QJ-01A | A |
| PCPG | TCGA-RT-A6YC-01A | A |
| PCPG | TCGA-WB-A821-01A | A |
| PCPG | TCGA-QR-A700-01A | A |
| PCPG | TCGA-QR-A70V-01A | A |
| PCPG | TCGA-RW-A681-01A | A |
| PCPG | TCGA-WB-A81K-01A | B |
| PCPG | TCGA-RW-A67V-01A | A |
| PCPG | TCGA-QT-A5XJ-01A | A |
| PCPG | TCGA-QR-A70A-01A | A |
| PCPG | TCGA-QR-A70P-01A | A |
| PCPG | TCGA-TT-A6YO-01A | B |
| PCPG | TCGA-QR-A70O-01A | A |
| PCPG | TCGA-XG-A823-01A | B |
| PCPG | TCGA-WB-A80K-01A | A |
| PCPG | TCGA-SR-A6MT-01A | A |
| PCPG | TCGA-RW-A67Y-01A | A |
| PCPG | TCGA-S7-A7WU-01A | A |
| PCPG | TCGA-RW-A68D-01A | A |
| PCPG | TCGA-P8-A6RX-01A | A |
| PCPG | TCGA-PR-A5PF-01A | A |
| PCPG | TCGA-QR-A6H0-01A | A |
| PCPG | TCGA-W2-A7UY-01A | A |

|      |                  |   |
|------|------------------|---|
| PCPG | TCGA-RW-A680-01A | A |
| PCPG | TCGA-QT-A5XO-01A | A |
| PCPG | TCGA-P8-A6RY-01A | A |
| PCPG | TCGA-S7-A7WQ-01A | A |
| PCPG | TCGA-QR-A70E-01A | A |
| PCPG | TCGA-PR-A5PH-01A | A |
| PCPG | TCGA-QR-A70J-01A | A |
| PCPG | TCGA-WB-A814-01A | A |
| PCPG | TCGA-TT-A6YN-01A | A |
| PCPG | TCGA-WB-A81S-01A | A |
| PCPG | TCGA-WB-A81I-01A | A |
| PCPG | TCGA-S7-A7WP-01A | A |
| PCPG | TCGA-QR-A6GR-01A | A |
| PCPG | TCGA-QR-A6GU-01A | A |
| PCPG | TCGA-W2-A7HE-01A | B |
| PCPG | TCGA-WB-A81M-01A | A |
| PCPG | TCGA-QR-A6H1-01A | A |
| PCPG | TCGA-SP-A6QD-01A | A |
| PCPG | TCGA-P7-A5NY-05A | A |
| PCPG | TCGA-RW-A689-01A | A |
| PCPG | TCGA-WB-A817-01A | B |
| PCPG | TCGA-QR-A70Q-01A | A |
| PCPG | TCGA-SA-A6C2-01A | A |
| PCPG | TCGA-S7-A7WM-01A | A |
| PCPG | TCGA-QR-A70K-01A | A |
| PCPG | TCGA-S7-A7WO-01A | B |
| PCPG | TCGA-WB-A80L-01A | A |
| PCPG | TCGA-RW-A684-01A | A |
| PCPG | TCGA-SR-A6MP-01A | A |
| PCPG | TCGA-QR-A7IN-01A | A |
| PCPG | TCGA-WB-A80N-01A | A |
| PCPG | TCGA-WB-A81R-01A | A |
| SARC | TCGA-KD-A5QU-01A | B |
| SARC | TCGA-HS-A5N8-01A | A |
| SARC | TCGA-K1-A42X-02A | B |
| SARC | TCGA-DX-A8BL-01A | B |
| SARC | TCGA-SI-A71P-01A | B |
| SARC | TCGA-WK-A8XS-01A | B |
| SARC | TCGA-DX-AB2Z-01A | B |
| SARC | TCGA-SI-AA8B-01A | B |
| SARC | TCGA-3B-A9HU-01A | B |
| SARC | TCGA-DX-A6YS-01A | B |
| SARC | TCGA-DX-AB2H-01A | A |
| SARC | TCGA-X6-A8C5-01A | B |
| SARC | TCGA-HB-A43Z-01A | B |
| SARC | TCGA-3B-A9HQ-01A | B |
| SARC | TCGA-DX-A6YU-01A | B |

|      |                  |   |
|------|------------------|---|
| SARC | TCGA-DX-A3UE-01A | B |
| SARC | TCGA-DX-A3M1-01A | B |
| SARC | TCGA-DX-AB2P-01A | B |
| SARC | TCGA-DX-A48J-01A | B |
| SARC | TCGA-DX-A7EI-01A | A |
| SARC | TCGA-DX-A6YX-01A | B |
| SARC | TCGA-DX-A6B7-01A | B |
| SARC | TCGA-FX-A3TO-01A | B |
| SARC | TCGA-DX-A8BK-01A | B |
| SARC | TCGA-DX-AB2S-01A | B |
| SARC | TCGA-FX-A8OO-01A | A |
| SARC | TCGA-DX-A1L0-01A | B |
| SARC | TCGA-3B-A9HV-01A | B |
| SARC | TCGA-X9-A973-01A | B |
| SARC | TCGA-DX-A6YR-01A | B |
| SARC | TCGA-QQ-A5VC-01A | B |
| SARC | TCGA-DX-A3UA-01A | B |
| SARC | TCGA-PT-A8TR-01A | A |
| SARC | TCGA-3B-A9HZ-01A | B |
| SARC | TCGA-QQ-A8VF-01A | B |
| SARC | TCGA-FX-A3NJ-01A | B |
| SARC | TCGA-K1-A3PO-01A | B |
| SARC | TCGA-IS-A3K8-01A | B |
| SARC | TCGA-DX-A1L2-01A | B |
| SARC | TCGA-DX-A7EN-01A | B |
| SARC | TCGA-X6-A8C3-01A | B |
| SARC | TCGA-X2-A95T-01A | B |
| SARC | TCGA-X6-A7WA-01A | B |
| SARC | TCGA-DX-A6YZ-01A | B |
| SARC | TCGA-SG-A6Z7-01A | A |
| SARC | TCGA-DX-A6Z0-01A | B |
| SARC | TCGA-DX-A6Z2-01A | B |
| SARC | TCGA-K1-A3PN-02A | B |
| SARC | TCGA-DX-AB2L-01A | B |
| SARC | TCGA-WK-A8Y0-01A | B |
| SARC | TCGA-DX-A23Z-01A | B |
| SARC | TCGA-3B-A9I0-01A | B |
| SARC | TCGA-DX-A1KZ-01A | B |
| SARC | TCGA-HB-A3YV-01A | A |
| SARC | TCGA-DX-A8BO-01A | B |
| SARC | TCGA-MJ-A68H-01A | B |
| SARC | TCGA-DX-AB37-01A | B |
| SARC | TCGA-DX-A7EF-01A | B |
| SARC | TCGA-DX-A7ES-01A | B |
| SARC | TCGA-SI-AA8C-01A | A |
| SARC | TCGA-3R-A8YX-01A | B |
| SARC | TCGA-WK-A8XO-01A | B |

|      |                  |   |
|------|------------------|---|
| SARC | TCGA-PC-A5DP-01A | B |
| SARC | TCGA-WK-A8XX-01A | B |
| SARC | TCGA-QQ-A8VH-01A | A |
| SARC | TCGA-DX-A48R-01A | B |
| SARC | TCGA-FX-A3NK-01A | B |
| SARC | TCGA-DX-AB36-01A | B |
| SARC | TCGA-3B-A9I1-01A | B |
| SARC | TCGA-IW-A3M5-01A | A |
| SARC | TCGA-UE-A6QT-01A | B |
| SARC | TCGA-KD-A5QT-01A | B |
| SARC | TCGA-DX-AB3A-01A | B |
| SARC | TCGA-Z4-AAPG-01A | B |
| SARC | TCGA-DX-A3U6-01A | B |
| SARC | TCGA-MB-A5YA-01A | B |
| SARC | TCGA-QQ-A5VD-01A | B |
| SARC | TCGA-SG-A849-01A | B |
| SARC | TCGA-IE-A4EH-01A | B |
| SARC | TCGA-QC-AA9N-01A | B |
| SARC | TCGA-3B-A9HO-01A | B |
| SARC | TCGA-DX-A7EM-01A | B |
| SARC | TCGA-DX-AB2Q-01A | B |
| SARC | TCGA-IE-A4EK-01A | B |
| SARC | TCGA-DX-AB2V-01A | B |
| SARC | TCGA-DX-A7EU-01A | B |
| SARC | TCGA-DX-A1KX-01A | B |
| SARC | TCGA-DX-A23R-01A | A |
| SARC | TCGA-3B-A9HI-01A | B |
| SARC | TCGA-WK-A8XY-01A | B |
| SARC | TCGA-3B-A9HP-01A | B |
| SARC | TCGA-DX-A1L1-01A | B |
| SARC | TCGA-MB-A5Y9-01A | B |
| SARC | TCGA-DX-A8BN-01A | B |
| SARC | TCGA-K1-A6RT-01A | B |
| SARC | TCGA-DX-AB2X-01A | B |
| SARC | TCGA-QQ-A8VG-01A | B |
| SARC | TCGA-IF-A4AK-01A | B |
| SARC | TCGA-WP-A9GB-01A | B |
| SARC | TCGA-MO-A47P-01A | B |
| SARC | TCGA-3B-A9HS-01A | B |
| SARC | TCGA-IE-A3OV-01A | B |
| SARC | TCGA-DX-A1L3-01A | B |
| SARC | TCGA-DX-A23T-01A | B |
| SARC | TCGA-3B-A9HY-01A | B |
| SARC | TCGA-DX-A3LY-01B | B |
| SARC | TCGA-LI-A9QH-01A | B |
| SARC | TCGA-DX-A48N-01A | B |
| SARC | TCGA-DX-AB32-01A | B |

|      |                  |   |
|------|------------------|---|
| SARC | TCGA-DX-A6B8-01A | B |
| SARC | TCGA-3B-A9HT-01A | B |
| SARC | TCGA-DX-A8BQ-01A | B |
| SARC | TCGA-DX-A23Y-01A | B |
| SARC | TCGA-DX-AB2G-01A | B |
| SARC | TCGA-VT-AB3D-01A | B |
| SARC | TCGA-DX-A8BT-01A | B |
| SARC | TCGA-DX-A8BJ-01A | B |
| SARC | TCGA-DX-A3UC-01A | B |
| SARC | TCGA-MO-A47R-01A | B |
| SARC | TCGA-QQ-A8VB-01A | A |
| SARC | TCGA-K1-A42W-01A | B |
| SARC | TCGA-DX-A8BX-01A | B |
| SARC | TCGA-VT-A80J-02A | B |
| SARC | TCGA-PC-A5DM-01A | B |
| SARC | TCGA-IS-A3KA-01A | B |
| SARC | TCGA-K1-A3PN-01A | B |
| SARC | TCGA-X6-A8C7-01A | A |
| SARC | TCGA-DX-A6YT-01A | B |
| SARC | TCGA-DX-A3LU-01A | B |
| SARC | TCGA-DX-A1KW-01A | B |
| SARC | TCGA-SG-A6Z4-01A | B |
| SARC | TCGA-DX-A23U-01A | B |
| SARC | TCGA-WK-A8XZ-01A | B |
| SARC | TCGA-IS-A3K7-01A | B |
| SARC | TCGA-DX-A8BH-01A | B |
| SARC | TCGA-DX-A2J0-01A | B |
| SARC | TCGA-FX-A48G-01A | B |
| SARC | TCGA-PC-A5DL-01A | B |
| SARC | TCGA-3B-A9HX-01A | B |
| SARC | TCGA-HS-A5N7-01A | B |
| SARC | TCGA-PC-A5DO-01A | B |
| SARC | TCGA-MJ-A68J-01A | B |
| SARC | TCGA-IF-A3RQ-01A | B |
| SARC | TCGA-IS-A3K6-01A | B |
| SARC | TCGA-DX-A8BS-01A | B |
| SARC | TCGA-X6-A7WB-01A | B |
| SARC | TCGA-IE-A4EJ-01A | B |
| SARC | TCGA-DX-A1KU-01A | B |
| SARC | TCGA-HS-A5N9-01A | B |
| SARC | TCGA-QQ-A8VD-01A | B |
| SARC | TCGA-DX-A8BP-01A | B |
| SARC | TCGA-DX-A6YV-01A | B |
| SARC | TCGA-WK-A8XQ-01A | B |
| SARC | TCGA-DX-A3LT-01A | B |
| SARC | TCGA-DX-A3M2-01A | B |
| SARC | TCGA-DX-AB2T-01A | B |

|      |                  |   |
|------|------------------|---|
| SARC | TCGA-VT-A80J-01A | B |
| SARC | TCGA-X6-A8C6-01A | B |
| SARC | TCGA-X6-A7WC-01A | B |
| SARC | TCGA-DX-A8BR-01A | B |
| SARC | TCGA-DX-A48K-01A | B |
| SARC | TCGA-SI-A71Q-01A | A |
| SARC | TCGA-SI-A71O-06A | B |
| SARC | TCGA-VT-A80G-01A | B |
| SARC | TCGA-DX-A240-01A | B |
| SARC | TCGA-K1-A42X-01A | B |
| SARC | TCGA-3B-A9HJ-01A | B |
| SARC | TCGA-QQ-A5VA-01A | B |
| SARC | TCGA-JV-A5VF-01A | A |
| SARC | TCGA-DX-AB2F-01A | B |
| SARC | TCGA-DX-AB35-01A | B |
| SARC | TCGA-KF-A41W-01A | B |
| SARC | TCGA-DX-A48P-01A | B |
| SARC | TCGA-3B-A9I3-01A | B |
| SARC | TCGA-DX-A7EL-01A | B |
| SARC | TCGA-DX-A6YQ-01A | B |
| SARC | TCGA-3B-A9HR-01A | B |
| SARC | TCGA-DX-A2J4-01A | B |
| SARC | TCGA-Z4-AAPF-01A | A |
| SARC | TCGA-HB-A3L4-01A | B |
| SARC | TCGA-FX-A3RE-01A | B |
| SARC | TCGA-N1-A6IA-01A | B |
| SARC | TCGA-HB-A2OT-01A | B |
| SARC | TCGA-DX-AB30-01A | A |
| SARC | TCGA-X6-A7W8-01A | B |
| SARC | TCGA-DX-A3U5-01A | B |
| SARC | TCGA-DX-A3UD-01A | B |
| SARC | TCGA-SI-A71O-01A | B |
| SARC | TCGA-UE-A6QU-01A | B |
| SARC | TCGA-QQ-A5VB-01A | B |
| SARC | TCGA-DX-A8BU-01A | B |
| SARC | TCGA-3B-A9HL-01A | B |
| SARC | TCGA-IW-A3M4-01A | B |
| SARC | TCGA-LI-A67I-01A | B |
| SARC | TCGA-IE-A4EI-01A | B |
| SARC | TCGA-DX-A7ER-01A | A |
| SARC | TCGA-DX-A3UF-01A | B |
| SARC | TCGA-DX-A3U9-01A | B |
| SARC | TCGA-X9-A971-01A | B |
| SARC | TCGA-DX-AB2E-01A | B |
| SARC | TCGA-DX-AB2W-01A | B |
| SARC | TCGA-DX-A7ET-01A | B |
| SARC | TCGA-PC-A5DN-01A | A |

|      |                  |   |
|------|------------------|---|
| SARC | TCGA-DX-A8BV-01A | B |
| SARC | TCGA-X6-A8C2-01A | B |
| SARC | TCGA-DX-A8BG-01A | B |
| SARC | TCGA-DX-A3LS-01A | B |
| SARC | TCGA-JV-A5VE-01A | B |
| SARC | TCGA-X6-A7WD-01A | B |
| SARC | TCGA-Z4-A9VC-01A | B |
| SARC | TCGA-DX-A1KY-01A | A |
| SARC | TCGA-JV-A75J-01A | A |
| SARC | TCGA-HB-A5W3-01A | B |
| SARC | TCGA-DX-AB2J-01A | A |
| SARC | TCGA-FX-A2QS-01A | B |
| SARC | TCGA-Z4-A8JB-01A | B |
| SARC | TCGA-DX-A23V-01A | B |
| SARC | TCGA-DX-A3U7-01A | B |
| SARC | TCGA-DX-A6BG-01A | B |
| SARC | TCGA-WK-A8XT-01A | A |
| SARC | TCGA-MJ-A850-01A | A |
| SARC | TCGA-DX-A48O-01A | B |
| SARC | TCGA-DX-A2IZ-01A | A |
| SARC | TCGA-FX-A76Y-01A | B |
| SARC | TCGA-KD-A5QS-01A | B |
| SARC | TCGA-X6-A8C4-01A | B |
| SARC | TCGA-DX-A3LW-01A | B |
| SARC | TCGA-MB-A8JK-01A | B |
| SARC | TCGA-QC-A6FX-01A | B |
| SARC | TCGA-IW-A3M6-01A | B |
| SARC | TCGA-DX-AB2O-01A | B |
| SARC | TCGA-QC-A7B5-01A | B |
| SARC | TCGA-DX-A6BB-01A | B |
| SARC | TCGA-RN-A68Q-01A | B |
| SARC | TCGA-DX-A7EO-01A | A |
| SARC | TCGA-K1-A6RV-01A | B |
| SARC | TCGA-DX-A8BZ-01A | B |
| SARC | TCGA-IE-A6BZ-01A | B |
| SARC | TCGA-DX-A48L-01A | B |
| SARC | TCGA-IF-A4AJ-01A | B |
| SARC | TCGA-DX-A1L4-01A | B |
| SARC | TCGA-MB-A8JL-01A | B |
| SARC | TCGA-RN-AAAQ-01A | B |
| SARC | TCGA-DX-AATS-01A | B |
| SARC | TCGA-DX-A48U-01A | B |
| SARC | TCGA-DX-A8BM-01A | B |
| SARC | TCGA-PC-A5DK-01A | B |
| SARC | TCGA-HS-A5NA-01A | B |
| SARC | TCGA-K1-A6RU-01A | B |
| SARC | TCGA-DX-A6B9-01A | B |

|      |                  |   |
|------|------------------|---|
| SARC | TCGA-DX-A6BF-01A | B |
| SARC | TCGA-DX-A6BE-01A | B |
| SARC | TCGA-DX-A3U8-01A | B |
| SARC | TCGA-MB-A5Y8-01A | B |
| SARC | TCGA-DX-A6BH-01A | B |
| SARC | TCGA-DX-A7EQ-01A | A |
| SARC | TCGA-QQ-A5V9-01A | B |
| SARC | TCGA-DX-AB3C-01A | A |
| SARC | TCGA-DX-A3UB-01A | B |
| SARC | TCGA-DX-A6BA-01A | B |
| SARC | TCGA-QQ-A5V2-01A | B |
| SARC | TCGA-DX-AB3B-01A | A |
| SARC | TCGA-DX-A2J1-01A | B |
| SKCM | TCGA-YG-AA3N-01A | A |
| SKCM | TCGA-ER-A193-06A | B |
| SKCM | TCGA-ER-A19A-06A | A |
| SKCM | TCGA-FS-A4FC-06A | A |
| SKCM | TCGA-EE-A2MN-06A | B |
| SKCM | TCGA-GN-A4U9-06A | B |
| SKCM | TCGA-EB-A5UN-06A | B |
| SKCM | TCGA-D9-A1JX-06A | B |
| SKCM | TCGA-WE-A8ZX-06A | B |
| SKCM | TCGA-BF-A1PX-01A | A |
| SKCM | TCGA-RP-A694-06A | B |
| SKCM | TCGA-EE-A2ML-06A | B |
| SKCM | TCGA-FS-A1ZR-06A | B |
| SKCM | TCGA-DA-A3F5-06A | B |
| SKCM | TCGA-D3-A5GR-06A | B |
| SKCM | TCGA-EE-A29A-06A | B |
| SKCM | TCGA-EB-A3XC-01A | A |
| SKCM | TCGA-FS-A1ZY-06A | B |
| SKCM | TCGA-EB-A4XL-01A | A |
| SKCM | TCGA-3N-A9WD-06A | B |
| SKCM | TCGA-D3-A51N-06A | B |
| SKCM | TCGA-EE-A2MT-06A | B |
| SKCM | TCGA-WE-A8ZM-06A | B |
| SKCM | TCGA-D3-A51J-06A | B |
| SKCM | TCGA-QB-AA9O-06A | B |
| SKCM | TCGA-FR-A2OS-01A | B |
| SKCM | TCGA-EE-A2GJ-06A | B |
| SKCM | TCGA-D3-A3C8-06A | B |
| SKCM | TCGA-LH-A9QB-06A | B |
| SKCM | TCGA-EE-A3AB-06A | B |
| SKCM | TCGA-EE-A2M5-06A | B |
| SKCM | TCGA-EB-A4OZ-01A | A |
| SKCM | TCGA-D3-A3BZ-06A | B |
| SKCM | TCGA-EE-A2MK-06A | B |

|      |                  |   |
|------|------------------|---|
| SKCM | TCGA-FS-A4F5-06A | B |
| SKCM | TCGA-YG-AA3P-06A | B |
| SKCM | TCGA-GF-A6C8-06A | B |
| SKCM | TCGA-BF-A3DN-01A | B |
| SKCM | TCGA-YD-A89C-06A | B |
| SKCM | TCGA-D3-A5GO-06A | B |
| SKCM | TCGA-D9-A3Z3-06A | B |
| SKCM | TCGA-W3-AA1W-06A | B |
| SKCM | TCGA-EE-A2GL-06A | B |
| SKCM | TCGA-D3-A8GM-06A | B |
| SKCM | TCGA-BF-AAP6-01A | B |
| SKCM | TCGA-ER-A19E-06A | B |
| SKCM | TCGA-EE-A29H-06A | B |
| SKCM | TCGA-EE-A2MQ-06A | B |
| SKCM | TCGA-EE-A2A0-06A | B |
| SKCM | TCGA-EE-A20H-06A | B |
| SKCM | TCGA-EE-A2MP-06A | B |
| SKCM | TCGA-D3-A3C1-06A | B |
| SKCM | TCGA-ER-A194-01A | B |
| SKCM | TCGA-BF-AAOU-01A | B |
| SKCM | TCGA-D3-A2JA-06A | B |
| SKCM | TCGA-EE-A3AF-06A | B |
| SKCM | TCGA-XV-A9W5-01A | A |
| SKCM | TCGA-EB-A3XD-01A | A |
| SKCM | TCGA-ER-A2NH-06A | B |
| SKCM | TCGA-QB-A6FS-06A | B |
| SKCM | TCGA-GN-A266-06A | B |
| SKCM | TCGA-ER-A2ND-06A | B |
| SKCM | TCGA-W3-AA1Q-06A | B |
| SKCM | TCGA-EE-A2GC-06A | B |
| SKCM | TCGA-D3-A1QA-07A | B |
| SKCM | TCGA-BF-A3DL-01A | B |
| SKCM | TCGA-EE-A2MG-06A | B |
| SKCM | TCGA-EB-A5KH-06A | B |
| SKCM | TCGA-EE-A29P-06A | B |
| SKCM | TCGA-GN-A4U4-06A | B |
| SKCM | TCGA-D3-A2JE-06A | B |
| SKCM | TCGA-D3-A3C7-06A | B |
| SKCM | TCGA-FS-A4F4-06A | B |
| SKCM | TCGA-EE-A3J4-06A | B |
| SKCM | TCGA-D3-A51E-06A | B |
| SKCM | TCGA-D3-A5GT-01A | B |
| SKCM | TCGA-RP-A693-06A | B |
| SKCM | TCGA-D9-A149-06A | B |
| SKCM | TCGA-GN-A9SD-06A | B |
| SKCM | TCGA-EB-A6R0-01A | B |
| SKCM | TCGA-FW-A3R5-06A | B |

|      |                  |   |
|------|------------------|---|
| SKCM | TCGA-W3-A825-06A | B |
| SKCM | TCGA-EB-A3XE-01A | A |
| SKCM | TCGA-ER-A2NF-06A | B |
| SKCM | TCGA-FR-A8YE-06A | B |
| SKCM | TCGA-XV-AAZV-01A | A |
| SKCM | TCGA-BF-AAP4-01A | B |
| SKCM | TCGA-IH-A3EA-01A | B |
| SKCM | TCGA-EE-A3AA-06A | B |
| SKCM | TCGA-GN-A263-01A | B |
| SKCM | TCGA-EB-A299-01A | A |
| SKCM | TCGA-GN-A26D-06A | B |
| SKCM | TCGA-D3-A2J7-06A | B |
| SKCM | TCGA-EB-A82C-01A | A |
| SKCM | TCGA-FS-A1ZD-06A | B |
| SKCM | TCGA-D9-A4Z6-06A | B |
| SKCM | TCGA-FS-A1ZH-06A | B |
| SKCM | TCGA-D3-A51F-06A | B |
| SKCM | TCGA-BF-AAP2-01A | A |
| SKCM | TCGA-BF-A9VF-01A | A |
| SKCM | TCGA-W3-AA1O-06A | B |
| SKCM | TCGA-EE-A20B-06A | B |
| SKCM | TCGA-D3-A8GC-06A | B |
| SKCM | TCGA-GN-A4U7-06A | B |
| SKCM | TCGA-EE-A2GI-06A | B |
| SKCM | TCGA-RP-A695-06A | B |
| SKCM | TCGA-DA-A95V-06A | B |
| SKCM | TCGA-GN-A8LN-01A | B |
| SKCM | TCGA-ER-A19D-06A | B |
| SKCM | TCGA-BF-A1PV-01A | B |
| SKCM | TCGA-ER-A19H-06A | B |
| SKCM | TCGA-W3-A828-06A | B |
| SKCM | TCGA-D9-A6EG-06A | B |
| SKCM | TCGA-EB-A82B-01A | B |
| SKCM | TCGA-EB-A5UM-01A | B |
| SKCM | TCGA-EB-A1NK-01A | A |
| SKCM | TCGA-FS-A1ZQ-06A | B |
| SKCM | TCGA-DA-A95Y-06A | B |
| SKCM | TCGA-EE-A29W-06A | B |
| SKCM | TCGA-FS-A1ZW-06A | B |
| SKCM | TCGA-DA-A960-01A | B |
| SKCM | TCGA-D3-A3MO-06A | B |
| SKCM | TCGA-EE-A3J8-06A | B |
| SKCM | TCGA-D9-A1JW-06A | B |
| SKCM | TCGA-EE-A3AG-06A | B |
| SKCM | TCGA-EE-A2A6-06A | B |
| SKCM | TCGA-EB-A4IS-01A | B |
| SKCM | TCGA-GN-A26A-06A | B |

|      |                  |   |
|------|------------------|---|
| SKCM | TCGA-ER-A19M-06A | B |
| SKCM | TCGA-EE-A183-06A | B |
| SKCM | TCGA-EB-A4OY-01A | B |
| SKCM | TCGA-GN-A267-06A | B |
| SKCM | TCGA-FS-A4FB-06A | B |
| SKCM | TCGA-GF-A3OT-06A | B |
| SKCM | TCGA-EE-A2GB-06A | B |
| SKCM | TCGA-D9-A148-06A | B |
| SKCM | TCGA-EE-A2MH-06A | B |
| SKCM | TCGA-FS-A4F9-06A | B |
| SKCM | TCGA-FS-A1Z3-06A | B |
| SKCM | TCGA-D3-A51T-06A | B |
| SKCM | TCGA-EB-A57M-01A | A |
| SKCM | TCGA-D3-A51G-06A | B |
| SKCM | TCGA-EE-A3JI-06A | B |
| SKCM | TCGA-D3-A3C3-06A | B |
| SKCM | TCGA-EE-A2GK-06A | B |
| SKCM | TCGA-Z2-AA3S-06A | B |
| SKCM | TCGA-BF-A1PU-01A | B |
| SKCM | TCGA-ER-A19S-06A | B |
| SKCM | TCGA-EB-A6QZ-01A | B |
| SKCM | TCGA-EB-A550-01A | A |
| SKCM | TCGA-EE-A2GR-06A | B |
| SKCM | TCGA-FS-A1YW-06A | B |
| SKCM | TCGA-D3-A8GK-06A | B |
| SKCM | TCGA-FS-A1ZU-06A | B |
| SKCM | TCGA-EE-A3AH-06A | B |
| SKCM | TCGA-D9-A4Z3-01A | B |
| SKCM | TCGA-EB-A3HV-01A | A |
| SKCM | TCGA-XV-AAZY-01A | B |
| SKCM | TCGA-D3-A1Q3-06A | B |
| SKCM | TCGA-ER-A195-06A | B |
| SKCM | TCGA-EE-A29S-06A | B |
| SKCM | TCGA-EE-A2GM-06B | B |
| SKCM | TCGA-EE-A3JE-06A | B |
| SKCM | TCGA-EE-A2GN-06A | B |
| SKCM | TCGA-D3-A1Q6-06A | B |
| SKCM | TCGA-D3-A8GN-06A | B |
| SKCM | TCGA-ER-A3ET-06A | B |
| SKCM | TCGA-WE-A8K6-06A | B |
| SKCM | TCGA-ER-A198-06A | B |
| SKCM | TCGA-XV-AAZW-01A | A |
| SKCM | TCGA-D9-A4Z5-01A | B |
| SKCM | TCGA-ER-A19L-06A | B |
| SKCM | TCGA-ER-A42H-01A | B |
| SKCM | TCGA-WE-A8JZ-06A | B |
| SKCM | TCGA-EB-A5SF-01A | A |

|      |                  |   |
|------|------------------|---|
| SKCM | TCGA-EE-A2GS-06A | B |
| SKCM | TCGA-ER-A3ES-06A | B |
| SKCM | TCGA-EB-A5VV-06A | B |
| SKCM | TCGA-ER-A19T-06A | B |
| SKCM | TCGA-HR-A2OG-06A | B |
| SKCM | TCGA-D3-A1QA-06A | B |
| SKCM | TCGA-EE-A2MU-06A | B |
| SKCM | TCGA-EB-A97M-01A | B |
| SKCM | TCGA-EB-A553-01A | B |
| SKCM | TCGA-XV-A9VZ-01A | A |
| SKCM | TCGA-D9-A3Z4-01A | B |
| SKCM | TCGA-Z2-A8RT-06A | B |
| SKCM | TCGA-3N-A9WB-06A | A |
| SKCM | TCGA-D9-A4Z2-01A | B |
| SKCM | TCGA-EB-A44P-01A | B |
| SKCM | TCGA-ER-A19G-06A | B |
| SKCM | TCGA-D3-A2JC-06A | B |
| SKCM | TCGA-EB-A44O-01A | A |
| SKCM | TCGA-EE-A29E-06A | B |
| SKCM | TCGA-FR-A44A-06A | B |
| SKCM | TCGA-ER-A42L-06A | B |
| SKCM | TCGA-DA-A95W-06A | B |
| SKCM | TCGA-ER-A19K-01A | A |
| SKCM | TCGA-ER-A3EV-06A | B |
| SKCM | TCGA-FS-A1YX-06A | B |
| SKCM | TCGA-EB-A3XF-01A | A |
| SKCM | TCGA-EE-A2GE-06A | B |
| SKCM | TCGA-WE-A8ZO-06A | B |
| SKCM | TCGA-EE-A29N-06A | B |
| SKCM | TCGA-D3-A3MU-06A | B |
| SKCM | TCGA-EE-A3JH-06A | B |
| SKCM | TCGA-WE-AA9Y-06A | B |
| SKCM | TCGA-D3-A3ML-06A | B |
| SKCM | TCGA-ER-A19Q-06A | B |
| SKCM | TCGA-DA-A1IA-06A | B |
| SKCM | TCGA-ER-A19W-06A | B |
| SKCM | TCGA-BF-A5EQ-01A | B |
| SKCM | TCGA-FS-A1ZG-06A | B |
| SKCM | TCGA-D3-A1Q8-06A | B |
| SKCM | TCGA-ER-A1A1-06A | B |
| SKCM | TCGA-EB-A6L9-06A | B |
| SKCM | TCGA-FR-A7UA-06A | B |
| SKCM | TCGA-EE-A3J7-06A | B |
| SKCM | TCGA-EB-A24C-01A | A |
| SKCM | TCGA-GN-A4U5-01A | A |
| SKCM | TCGA-EE-A2MF-06A | B |
| SKCM | TCGA-EE-A2GU-06A | B |

|      |                  |   |
|------|------------------|---|
| SKCM | TCGA-DA-A1IB-06A | B |
| SKCM | TCGA-FS-A4F8-06A | B |
| SKCM | TCGA-ER-A2NC-06A | B |
| SKCM | TCGA-EE-A3JA-06A | B |
| SKCM | TCGA-D9-A3Z1-06A | B |
| SKCM | TCGA-EB-A44R-06A | B |
| SKCM | TCGA-D3-A1Q4-06A | B |
| SKCM | TCGA-D3-A51K-06A | B |
| SKCM | TCGA-EE-A29T-06A | B |
| SKCM | TCGA-FS-A1ZS-06A | B |
| SKCM | TCGA-FW-A5DY-06A | B |
| SKCM | TCGA-BF-A3DJ-01A | A |
| SKCM | TCGA-D9-A6E9-06A | B |
| SKCM | TCGA-BF-AAP8-01A | B |
| SKCM | TCGA-EE-A29B-06A | B |
| SKCM | TCGA-EE-A3AD-06A | B |
| SKCM | TCGA-EE-A2GO-06A | B |
| SKCM | TCGA-GF-A6C9-06A | B |
| SKCM | TCGA-EB-A5SE-01A | A |
| SKCM | TCGA-YD-A9TA-06A | B |
| SKCM | TCGA-EE-A2MJ-06A | B |
| SKCM | TCGA-D3-A2J8-06A | B |
| SKCM | TCGA-GN-A4U8-06A | B |
| SKCM | TCGA-EE-A2MC-06A | B |
| SKCM | TCGA-FR-A728-01A | B |
| SKCM | TCGA-FS-A4FD-06A | B |
| SKCM | TCGA-EE-A2M8-06A | B |
| SKCM | TCGA-GN-A264-06A | B |
| SKCM | TCGA-FS-A1ZN-01A | A |
| SKCM | TCGA-D9-A6EA-06A | B |
| SKCM | TCGA-FS-A1ZE-06A | B |
| SKCM | TCGA-EB-A5VU-01A | A |
| SKCM | TCGA-D3-A51H-06A | B |
| SKCM | TCGA-ER-A197-06A | B |
| SKCM | TCGA-3N-A9WC-06A | B |
| SKCM | TCGA-GN-A8LL-06A | B |
| SKCM | TCGA-FS-A4F2-06A | B |
| SKCM | TCGA-EE-A3AC-06A | B |
| SKCM | TCGA-FS-A1ZT-06A | B |
| SKCM | TCGA-DA-A1I2-06A | B |
| SKCM | TCGA-WE-A8ZN-06A | B |
| SKCM | TCGA-EE-A17Z-06A | B |
| SKCM | TCGA-WE-A8ZY-06A | B |
| SKCM | TCGA-EE-A20F-06A | B |
| SKCM | TCGA-FS-A1YY-06A | B |
| SKCM | TCGA-RP-A690-06A | B |
| SKCM | TCGA-D3-A3MR-06A | B |

|      |                  |   |
|------|------------------|---|
| SKCM | TCGA-FR-A726-01A | B |
| SKCM | TCGA-D3-A8GQ-06A | B |
| SKCM | TCGA-ER-A19T-01A | B |
| SKCM | TCGA-ER-A19O-06A | B |
| SKCM | TCGA-D3-A2JH-06A | B |
| SKCM | TCGA-EE-A2GD-06A | B |
| SKCM | TCGA-EE-A2MD-06A | B |
| SKCM | TCGA-EE-A2MS-06A | B |
| SKCM | TCGA-EB-A44N-01A | A |
| SKCM | TCGA-W3-A824-06A | B |
| SKCM | TCGA-EB-A41A-01A | B |
| SKCM | TCGA-EE-A2ME-06A | B |
| SKCM | TCGA-EE-A20C-06A | B |
| SKCM | TCGA-D3-A8GR-06A | B |
| SKCM | TCGA-FW-A3TU-06A | B |
| SKCM | TCGA-EE-A29D-06A | B |
| SKCM | TCGA-ER-A2NB-01A | A |
| SKCM | TCGA-D9-A6EC-06A | B |
| SKCM | TCGA-EE-A29M-06A | B |
| SKCM | TCGA-FR-A729-06A | B |
| SKCM | TCGA-FR-A69P-06A | B |
| SKCM | TCGA-FS-A4F0-06A | B |
| SKCM | TCGA-EB-A42Y-01A | B |
| SKCM | TCGA-BF-A5EP-01A | B |
| SKCM | TCGA-FR-A3YO-06A | B |
| SKCM | TCGA-FR-A8YD-06A | B |
| SKCM | TCGA-FR-A7U9-06A | B |
| SKCM | TCGA-GN-A4U3-06A | B |
| SKCM | TCGA-ER-A19J-06A | B |
| SKCM | TCGA-D3-A3CF-06A | B |
| SKCM | TCGA-GN-A265-06A | B |
| SKCM | TCGA-GN-A26C-01A | B |
| SKCM | TCGA-EB-A41B-01A | B |
| SKCM | TCGA-OD-A75X-06A | B |
| SKCM | TCGA-EE-A2M7-06A | B |
| SKCM | TCGA-GF-A769-01A | B |
| SKCM | TCGA-EB-A430-01A | B |
| SKCM | TCGA-W3-AA1R-06A | B |
| SKCM | TCGA-EB-A3Y7-01A | A |
| SKCM | TCGA-EB-A3Y6-01A | B |
| SKCM | TCGA-ER-A199-06A | B |
| SKCM | TCGA-FR-A7U8-06A | B |
| SKCM | TCGA-W3-AA21-06A | B |
| SKCM | TCGA-WE-AAA4-06A | B |
| SKCM | TCGA-EB-A24D-01A | B |
| SKCM | TCGA-D3-A1Q1-06A | B |
| SKCM | TCGA-D3-A2JO-06A | B |

|      |                  |   |
|------|------------------|---|
| SKCM | TCGA-EE-A2MM-06A | B |
| SKCM | TCGA-ER-A19B-06A | B |
| SKCM | TCGA-DA-A1IC-06A | A |
| SKCM | TCGA-D3-A8GL-06A | B |
| SKCM | TCGA-FS-A1ZM-06A | B |
| SKCM | TCGA-D3-A2JG-06A | B |
| SKCM | TCGA-BF-AAOX-01A | A |
| SKCM | TCGA-D3-A3C6-06A | B |
| SKCM | TCGA-EE-A2GT-06A | B |
| SKCM | TCGA-FS-A1ZJ-06A | B |
| SKCM | TCGA-BF-A5EO-01A | A |
| SKCM | TCGA-EE-A2OI-06A | B |
| SKCM | TCGA-BF-A1PZ-01A | B |
| SKCM | TCGA-EE-A2MI-06A | B |
| SKCM | TCGA-EB-A5SG-06A | B |
| SKCM | TCGA-FS-A1ZC-06A | B |
| SKCM | TCGA-D3-A1Q5-06A | B |
| SKCM | TCGA-ER-A19F-06A | B |
| SKCM | TCGA-WE-AAA3-06A | B |
| SKCM | TCGA-ER-A19P-06A | B |
| SKCM | TCGA-RP-A6K9-06A | B |
| SKCM | TCGA-BF-AAP0-06A | B |
| SKCM | TCGA-EB-A4P0-01A | B |
| SKCM | TCGA-D3-A2J9-06A | B |
| SKCM | TCGA-EB-A3XB-01A | B |
| SKCM | TCGA-GN-A8LK-06A | B |
| SKCM | TCGA-FR-A3R1-01A | B |
| SKCM | TCGA-BF-A3DM-01A | B |
| SKCM | TCGA-EE-A2MR-06A | B |
| SKCM | TCGA-FS-A1ZA-06A | B |
| SKCM | TCGA-D3-A2JK-06A | B |
| SKCM | TCGA-WE-A8ZR-06A | B |
| SKCM | TCGA-D3-A2J6-06A | B |
| SKCM | TCGA-EE-A185-06A | A |
| SKCM | TCGA-DA-A1HW-06A | B |
| SKCM | TCGA-D9-A1X3-06A | B |
| SKCM | TCGA-EB-A5UL-06A | B |
| SKCM | TCGA-D3-A8GD-06A | B |
| SKCM | TCGA-D3-A2JD-06A | B |
| SKCM | TCGA-EB-A5SH-06A | B |
| SKCM | TCGA-WE-AAA0-06A | B |
| SKCM | TCGA-WE-A8ZT-06A | B |
| SKCM | TCGA-EB-A5FP-01A | A |
| SKCM | TCGA-D3-A2JN-06A | B |
| SKCM | TCGA-EE-A29Q-06A | B |
| SKCM | TCGA-EB-A44Q-06A | B |
| SKCM | TCGA-EE-A3JD-06A | B |

|      |                  |   |
|------|------------------|---|
| SKCM | TCGA-D3-A1Q9-06A | B |
| SKCM | TCGA-EE-A3JB-06A | B |
| SKCM | TCGA-EE-A182-06A | A |
| SKCM | TCGA-EE-A17X-06A | B |
| SKCM | TCGA-EE-A29L-06A | B |
| SKCM | TCGA-EE-A3J3-06A | B |
| SKCM | TCGA-EB-A85I-01A | B |
| SKCM | TCGA-DA-A95X-06A | B |
| SKCM | TCGA-FR-A3YN-06A | B |
| SKCM | TCGA-D3-A8GE-06A | B |
| SKCM | TCGA-D3-A1Q7-06A | B |
| SKCM | TCGA-WE-A8ZQ-06A | B |
| SKCM | TCGA-EB-A85J-01A | B |
| SKCM | TCGA-D3-A8GP-06A | B |
| SKCM | TCGA-EB-A42Z-01A | B |
| SKCM | TCGA-EB-A4IQ-01A | A |
| SKCM | TCGA-D3-A5GS-06A | B |
| SKCM | TCGA-DA-A1I7-06A | B |
| SKCM | TCGA-FS-A1ZP-06A | B |
| SKCM | TCGA-D3-A3CE-06A | B |
| SKCM | TCGA-ER-A3PL-06A | B |
| SKCM | TCGA-FS-A1Z0-06A | B |
| SKCM | TCGA-DA-A1HV-06A | B |
| SKCM | TCGA-EE-A2GH-06A | B |
| SKCM | TCGA-D3-A51R-06A | B |
| SKCM | TCGA-DA-A1I4-06A | B |
| SKCM | TCGA-GF-A2C7-01A | A |
| SKCM | TCGA-FW-A5DX-01A | B |
| SKCM | TCGA-WE-A8K1-06A | B |
| SKCM | TCGA-EE-A2A2-06A | B |
| SKCM | TCGA-EE-A2GP-06A | B |
| SKCM | TCGA-ER-A19N-06A | B |
| SKCM | TCGA-FS-A1Z4-06A | B |
| SKCM | TCGA-FS-A1ZB-06A | A |
| SKCM | TCGA-GN-A268-06A | B |
| SKCM | TCGA-FS-A1ZZ-06A | B |
| SKCM | TCGA-DA-A95Z-06A | B |
| SKCM | TCGA-EE-A29G-06A | A |
| SKCM | TCGA-EE-A2M6-06A | B |
| SKCM | TCGA-EE-A29X-06A | B |
| SKCM | TCGA-EE-A184-06A | B |
| SKCM | TCGA-BF-A1Q0-01A | B |
| SKCM | TCGA-EB-A6QY-01A | A |
| SKCM | TCGA-D3-A5GL-06A | B |
| SKCM | TCGA-DA-A3F2-06A | B |
| SKCM | TCGA-EE-A17Y-06A | B |
| SKCM | TCGA-D3-A2JL-06A | B |

|      |                  |   |
|------|------------------|---|
| SKCM | TCGA-D3-A8GJ-06A | B |
| SKCM | TCGA-D3-A8GO-06A | B |
| SKCM | TCGA-EE-A2A1-06A | B |
| SKCM | TCGA-GF-A4EO-06A | B |
| SKCM | TCGA-ER-A2NG-06A | B |
| SKCM | TCGA-D3-A5GN-06A | B |
| SKCM | TCGA-D3-A3CC-06A | B |
| SKCM | TCGA-ER-A42K-06A | B |
| SKCM | TCGA-EE-A2A5-06A | B |
| SKCM | TCGA-D3-A8GS-06A | B |
| SKCM | TCGA-GN-A262-06A | B |
| SKCM | TCGA-EE-A181-06A | B |
| SKCM | TCGA-DA-A1HY-06A | B |
| SKCM | TCGA-BF-AAP7-01A | A |
| SKCM | TCGA-EE-A29R-06A | B |
| SKCM | TCGA-HR-A5NC-01A | A |
| SKCM | TCGA-EE-A29C-06A | B |
| SKCM | TCGA-EB-A551-01A | B |
| SKCM | TCGA-EB-A51B-01A | A |
| SKCM | TCGA-ER-A2NE-06A | B |
| SKCM | TCGA-D3-A2JP-06A | B |
| SKCM | TCGA-FR-A8YC-06A | B |
| SKCM | TCGA-D3-A5GU-06A | B |
| SKCM | TCGA-D3-A1QB-06A | B |
| SKCM | TCGA-YG-AA3O-06A | B |
| SKCM | TCGA-D3-A8GI-06A | B |
| SKCM | TCGA-DA-A1I0-06A | B |
| SKCM | TCGA-ER-A19C-06A | B |
| SKCM | TCGA-DA-A1I8-06A | B |
| SKCM | TCGA-ER-A196-01A | A |
| SKCM | TCGA-FS-A1ZK-06A | B |
| SKCM | TCGA-ER-A2NF-01A | B |
| SKCM | TCGA-EB-A431-01A | B |
| SKCM | TCGA-D3-A2JF-06A | B |
| SKCM | TCGA-DA-A3F8-06A | B |
| SKCM | TCGA-D3-A8GV-06A | B |
| SKCM | TCGA-FW-A3TV-06A | B |
| SKCM | TCGA-YD-A9TB-06A | B |
| SKCM | TCGA-Z2-AA3V-06A | B |
| SKCM | TCGA-BF-AAP1-01A | B |
| SKCM | TCGA-WE-A8K5-06A | B |
| SKCM | TCGA-W3-AA1V-06B | B |
| SKCM | TCGA-DA-A1I5-06A | B |
| SKCM | TCGA-D3-A2JB-06A | B |
| SKCM | TCGA-D3-A3MV-06A | B |
| SKCM | TCGA-DA-A1I1-06A | B |
| SKCM | TCGA-WE-A8K4-01A | B |

|      |                  |   |
|------|------------------|---|
| SKCM | TCGA-BF-A5ES-01A | B |
| SKCM | TCGA-EE-A29V-06A | A |
| SKCM | TCGA-D3-A8GB-06A | B |
| SKCM | TCGA-EE-A180-06A | B |
| SKCM | TCGA-XV-A9W2-01A | A |
| SKCM | TCGA-FW-A3I3-06A | A |
| SKCM | TCGA-FS-A1ZF-06A | B |
| SKCM | TCGA-BF-A5ER-01A | A |
| SKCM | TCGA-D3-A3CB-06A | B |
| SKCM | TCGA-HR-A2OH-06A | B |
| SKCM | TCGA-DA-A3F3-06A | B |
| SKCM | TCGA-EE-A3J5-06A | B |
| SKCM | TCGA-XV-AB01-06A | B |
| SKCM | TCGA-FS-A1Z7-06A | B |
